# Supplementary material for: A TRAF-like E3 ubiquitin ligase TrafE coordinates ESCRT and autophagy in endolysosomal damage response and cell-autonomous immunity to Mycobacterium marinum
Source: eLife. 2023 Apr 18;12:e85727. doi: 10.7554/eLife.85727 (PMC10181826; doi:10.7554/eLife.85727)
Supplement: Figure 1—figure supplement 3—source data 1. [file elife-85727-fig1-figsupp3-data1.xlsx]

## Sheet: Sheet1
time (hpi)	strain	nb_infected_cells	nb_GFP_on_MCV
1.5	Dd TrafA	11	0
1.5	Dd TrafA	10	0
1.5	Dd TrafA	5	1
3	Dd TrafA	7	0
3	Dd TrafA	12	1
3	Dd TrafA	7	0
6	Dd TrafA	9	0
6	Dd TrafA	3	0
6	Dd TrafA	5	0
24	Dd TrafA	4	0
24	Dd TrafA	2	0
24	Dd TrafA	3	0
1.5	Dd TrafB	4	0
1.5	Dd TrafB	15	1
1.5	Dd TrafB	6	0
3	Dd TrafB	12	1
3	Dd TrafB	10	1
3	Dd TrafB	8	1
6	Dd TrafB	14	1
6	Dd TrafB	9	1
6	Dd TrafB	6	0
24	Dd TrafB	6	1
24	Dd TrafB	6	1
24	Dd TrafB	4	0
1.5	Dd TrafC	8	4
1.5	Dd TrafC	8	2
1.5	Dd TrafC	12	2
3	Dd TrafC	10	2
3	Dd TrafC	13	3
3	Dd TrafC	12	2
6	Dd TrafC	13	2
6	Dd TrafC	16	3
6	Dd TrafC	16	0
24	Dd TrafC	10	1
24	Dd TrafC	4	0
24	Dd TrafC	21	3
1.5	Dd TrafD	23	1
1.5	Dd TrafD	32	3
1.5	Dd TrafD	35	2
3	Dd TrafD	22	1
3	Dd TrafD	25	2
3	Dd TrafD	18	2
6	Dd TrafD	35	2
6	Dd TrafD	34	3
6	Dd TrafD	23	2
24	Dd TrafD	11	1
24	Dd TrafD	18	5
24	Dd TrafD	17	4
