# Supplementary material for: A TRAF-like E3 ubiquitin ligase TrafE coordinates ESCRT and autophagy in endolysosomal damage response and cell-autonomous immunity to Mycobacterium marinum
Source: eLife. 2023 Apr 18;12:e85727. doi: 10.7554/eLife.85727 (PMC10181826; doi:10.7554/eLife.85727)
Supplement: Figure 1—figure supplement 4—source data 1. [file elife-85727-fig1-figsupp4-data1.xlsx]

## Sheet: raw_data
time	Dd wt			Dd GFP-TrafC			Dd GFP-TrafD			Dd GFP-TrafE
0	69	70	80	68	60	74	63	79	80	71	62	59
1	81	87	83	91	82	90	80	83	90	58	64	73
2	76	83	79	74	68	69	67	73	66	59	56	71
3	66	66	77	73	64	73	63	69	60	53	54	64
4	88	73	86	79	83	89	89	68	81	75	68	78
5	85	72	67	84	69	83	93	80	74	81	59	68
6	71	90	75	73	81	72	64	77	76	60	68	69
7	71	73	73	80	84	82	98	85	83	60	71	65
8	97	109	65	85	84	86	90	81	99	61	71	67
9	83	79	89	79	78	81	99	77	96	60	70	67
10	86	79	98	80	90	102	95	89	88	79	57	72
11	82	78	111	91	84	87	93	113	88	80	70	77
12	94	81	101	92	76	96	109	89	109	65	80	58
13	85	114	101	82	97	119	131	73	89	68	67	71
14	121	112	108	101	96	87	104	115	86	67	65	65
15	97	106	93	93	122	106	114	97	97	69	84	72
16	112	125	118	107	104	116	121	94	126	80	64	81
17	112	95	103	100	101	111	103	95	108	70	74	76
18	106	93	110	107	137	117	129	109	110	86	74	86
19	128	142	112	111	106	124	115	119	122	65	79	77
20	119	114	108	139	121	155	136	122	139	68	74	74
21	109	138	134	149	137	153	155	128	156	83	73	78
22	139	136	152	134	140	154	154	132	145	81	63	65
23	136	144	142	162	145	148	146	133	136	89	70	80
24	137	126	116	146	154	144	164	135	152	106	95	99
25	142	151	139	158	161	156	183	156	145	85	88	105
26	160	185	140	158	169	172	157	163	143	91	85	101
27	166	146	146	167	184	172	181	178	153	95	75	89
28	144	159	140	159	202	167	194	154	182	104	92	98
29	200	140	138	205	172	164	174	190	176	99	120	125
30	199	157	167	191	209	199	195	190	193	98	106	107
31	184	188	186	196	183	193	183	174	191	73	88	117
32	200	179	192	222	199	175	199	183	167	99	107	118
33	177	177	184	222	218	187	182	194	189	99	112	98
34	185	194	195	226	223	223	189	180	190	114	105	119
35	196	184	197	202	197	221	203	184	190	100	102	115
36	232	193	218	242	219	218	218	188	220	125	111	110
37	209	200	226	263	223	219	189	219	184	119	110	118
38	203	188	205	224	222	186	208	218	230	102	94	120
39	206	182	205	246	232	221	226	211	216	114	114	107
40	235	209	207	275	231	216	233	219	208	155	125	116
41	218	219	212	254	230	235	260	252	225	116	105	123
42	249	233	252	273	217	220	223	260	202	105	130	124
43	232	205	227	276	237	238	247	203	235	114	114	124
44	285	204	214	304	264	236	218	228	235	119	129	125
45	245	236	194	280	258	265	238	244	223	155	129	126
46	261	218	247	277	271	267	268	257	228	127	119	132
47	260	233	289	266	256	247	275	242	225	147	148	131
48	244	225	252	294	243	264	293	229	251	144	135	145
49	260	223	262	304	281	258	238	249	262	136	125	136
50	276	236	235	307	261	258	263	252	264	136	143	139
51	288	245	287	293	245	284	259	295	250	135	151	149
52	330	201	273	281	261	286	249	260	263	149	137	144
53	299	247	257	286	245	287	280	254	272	141	159	175
54	339	234	262	308	290	260	265	292	285	143	164	128
55	353	228	255	277	278	255	291	251	247	149	146	123
56	323	236	289	311	294	281	266	258	251	169	168	144
57	345	233	274	308	296	288	335	263	270	157	138	152
58	345	277	289	339	297	349	307	274	253	167	145	148
59	347	244	301	308	307	301	293	290	266	175	170	146
60	303	272	273	301	326	304	291	289	282	173	157	157
61	332	285	312	305	314	298	292	290	268	172	152	127
62	365	295	308	323	313	336	286	271	261	175	145	147
63	341	282	316	309	303	332	311	290	293	205	148	128
64	327	263	318	321	307	342	329	315	276	203	181	169
65	377	307	304	317	304	330	303	297	271	176	140	153
66	400	299	331	355	339	337	312	287	238	190	154	136
67	381	299	327	316	304	302	325	281	299	205	172	152
68	381	288	342	334	348	309	300	280	284	186	161	173
69	365	265	356	329	315	314	275	302	275	205	173	170
70	376	305	351	358	310	328	332	316	269	203	166	172
71	393	311	329	311	338	315	290	284	284	228	206	202
72	352	336	348	325	398	364	293	293	274	192	187	173

## Sheet: baseline_corrected
	Dd wt		Dd GFP-TrafC		Dd GFP-TrafD		Dd GFP-TrafE
	Mean	SEM	Mean	SEM	Mean	SEM	Mean	SEM
0	0.940722	0.0558858	0.888303	0.0719891	0.9991	0.0890392	0.994819	0.0699802
1	1.07818	0.043919	1.15655	0.07311	1.13861	0.0686683	1.01036	0.080014
2	1.02234	0.0441864	0.92788	0.0559573	0.927093	0.0541872	0.963731	0.0819885
3	0.897766	0.0566727	0.923483	0.0638294	0.864086	0.0554089	0.88601	0.0661286
4	1.061	0.0709891	1.10378	0.0710798	1.07111	0.0978899	1.14508	0.0666907
5	0.962199	0.0768356	1.03782	0.0851328	1.11161	0.09328	1.07772	0.10915
6	1.01375	0.0824767	0.993843	0.0656977	0.976598	0.0739708	1.02073	0.0617142
7	0.932131	0.0336058	1.08179	0.0606083	1.19712	0.0864535	1.01554	0.0653694
8	1.16409	0.174021	1.12137	0.061284	1.21512	0.0920311	1.03109	0.0626651
9	1.07818	0.0530523	1.04661	0.0579352	1.22412	0.110676	1.02073	0.0630058
10	1.12973	0.0816185	1.19613	0.106049	1.22412	0.0668706	1.07772	0.110616
11	1.16409	0.139999	1.15215	0.0679635	1.32313	0.12182	1.17617	0.067644
12	1.18557	0.0860762	1.16095	0.102279	1.38164	0.112644	1.05181	0.110172
13	1.28866	0.117035	1.31047	0.158564	1.31863	0.242285	1.06736	0.0486894
14	1.46478	0.071138	1.2489	0.0866411	1.37264	0.132479	1.02073	0.0442295
15	1.27148	0.0664685	1.41161	0.134539	1.38614	0.102325	1.1658	0.0865202
16	1.52491	0.0718911	1.43799	0.0913412	1.53465	0.153835	1.1658	0.0986957
17	1.33162	0.078474	1.37203	0.0876477	1.37714	0.0846757	1.1399	0.0552945
18	1.32732	0.0807052	1.58751	0.144733	1.56616	0.116665	1.27461	0.0821515
19	1.64089	0.125476	1.49956	0.107801	1.60216	0.0831718	1.14508	0.0833328
20	1.46478	0.0654649	1.82498	0.163032	1.78668	0.112576	1.11917	0.0564727
21	1.6366	0.130102	1.93052	0.1224	1.9757	0.1572	1.21244	0.0679857
22	1.83419	0.0899504	1.88215	0.128561	1.93969	0.128351	1.0829	0.0995997
23	1.81271	0.0703663	2.00088	0.128644	1.86769	0.105818	1.23834	0.0999831
24	1.62801	0.0965781	1.95251	0.113291	2.0297	0.151001	1.5544	0.082367
25	1.85567	0.0796379	2.08883	0.114882	2.17822	0.186098	1.44041	0.114242
26	2.08333	0.182788	2.19437	0.131575	2.08371	0.129744	1.43523	0.0944312
27	1.96735	0.109921	2.29991	0.141361	2.30423	0.164677	1.34197	0.10807
28	1.90292	0.099765	2.3219	0.214931	2.38524	0.198172	1.52332	0.0837689
29	2.05326	0.271727	2.37907	0.209871	2.43024	0.137149	1.78238	0.144799
30	2.24656	0.18104	2.63412	0.1585	2.60126	0.129013	1.6114	0.0810406
31	2.39691	0.0848584	2.51539	0.145924	2.46625	0.137879	1.44041	0.20971
32	2.45275	0.116304	2.62093	0.228568	2.47075	0.173851	1.67876	0.111041
33	2.311	0.0859785	2.75726	0.208919	2.54275	0.133207	1.60104	0.0972708
34	2.46564	0.0952083	2.95515	0.160791	2.51575	0.130581	1.7513	0.0974494
35	2.47852	0.101783	2.72647	0.176525	2.59676	0.148106	1.64249	0.100647
36	2.76203	0.175712	2.98593	0.192124	2.81728	0.196462	1.79275	0.10662
37	2.72766	0.136707	3.10026	0.250217	2.66427	0.197053	1.79793	0.0877273
38	2.56014	0.112878	2.77924	0.221914	2.9523	0.168275	1.63731	0.137983
39	2.54725	0.134485	3.07388	0.192076	2.93879	0.155876	1.73575	0.0816203
40	2.79639	0.151679	3.17502	0.290167	2.9703	0.175328	2.05181	0.202622
41	2.7878	0.101168	3.16183	0.196721	3.31683	0.216499	1.78238	0.110764
42	3.15292	0.133612	3.12225	0.29366	3.08281	0.274288	1.8601	0.14092
43	2.85223	0.145961	3.30255	0.246478	3.08281	0.232962	1.82383	0.0926684
44	3.01976	0.34502	3.53562	0.323297	3.06481	0.164337	1.93264	0.0931044
45	2.89948	0.226343	3.53122	0.209755	3.17282	0.176915	2.12435	0.168796
46	3.11856	0.196063	3.58399	0.198095	3.38884	0.23139	1.95855	0.101342
47	3.35911	0.239007	3.38171	0.197152	3.33933	0.257037	2.20725	0.126391
48	3.09708	0.14933	3.52243	0.273132	3.47885	0.305495	2.19689	0.104917
49	3.20017	0.197841	3.70712	0.266649	3.37084	0.18993	2.05699	0.103716
50	3.20876	0.206851	3.63237	0.287334	3.50585	0.179522	2.1658	0.0965255
51	3.52234	0.220033	3.61478	0.276028	3.61836	0.256735	2.25389	0.123027
52	3.45361	0.4958	3.64116	0.221673	3.47435	0.179743	2.22798	0.108328
53	3.44931	0.237902	3.59719	0.267152	3.62736	0.205894	2.46114	0.18453
54	3.58677	0.42341	3.77309	0.275637	3.78938	0.215486	2.25389	0.188019
55	3.59107	0.505124	3.56201	0.217058	3.55086	0.257427	2.1658	0.156906
56	3.64261	0.350043	3.89622	0.240355	3.48785	0.180707	2.49223	0.164793
57	3.65979	0.440473	3.9226	0.226109	3.90639	0.363937	2.31606	0.131648
58	3.91323	0.30253	4.33157	0.315185	3.75338	0.28085	2.38342	0.146779
59	3.83162	0.406459	4.02814	0.22033	3.82088	0.219972	2.54404	0.175617
60	3.64261	0.182477	4.09411	0.245152	3.87939	0.193702	2.52332	0.134801
61	3.99055	0.223923	4.03254	0.227047	3.82538	0.214333	2.33679	0.225013
62	4.15808	0.312641	4.27441	0.247875	3.68137	0.205393	2.41969	0.181791
63	4.03351	0.261363	4.15128	0.253516	4.0234	0.216186	2.49223	0.373616
64	3.90034	0.29142	4.26561	0.267412	4.14041	0.295006	2.86528	0.196254
65	4.24399	0.341079	4.18206	0.247456	3.91989	0.233459	2.43005	0.192989
66	4.4244	0.413841	4.53386	0.257086	3.76688	0.346693	2.48705	0.268074
67	4.3256	0.34482	4.05453	0.227304	4.07291	0.263807	2.74093	0.266504
68	4.34278	0.379	4.35796	0.280165	3.88839	0.207694	2.6943	0.159602
69	4.2354	0.437261	4.21284	0.237213	3.83438	0.223818	2.83938	0.211225
70	4.43299	0.309304	4.37995	0.300874	4.12691	0.325703	2.80311	0.213782
71	4.43729	0.355995	4.23923	0.255272	3.86139	0.191201	3.29534	0.187232
72	4.45017	0.167024	4.78012	0.380266	3.87039	0.208105	2.8601	0.149427
