# Supplementary material for: A TRAF-like E3 ubiquitin ligase TrafE coordinates ESCRT and autophagy in endolysosomal damage response and cell-autonomous immunity to Mycobacterium marinum
Source: eLife. 2023 Apr 18;12:e85727. doi: 10.7554/eLife.85727 (PMC10181826; doi:10.7554/eLife.85727)
Supplement: Figure 1—figure supplement 4—source data 2. [file elife-85727-fig1-figsupp4-data2.xlsx]

## Sheet: raw_data
time	wt			TrafE-GFP KI			trafE KO
0	1031	1038	1095	948	920	918	234	237	250
1	1272	1289	1317	1037	1120	1053	295	234	275
2	1220	1381	1379	1026	1014	1096	242	244	243
3	1343	1313	1401	1039	1093	955	267	250	244
4	1397	1432	1488	1085	1132	1180	254	227	239
5	1431	1542	1557	1206	1175	1150	231	225	226
6	1590	1627	1649	1272	1277	1244	207	211	209
7	1726	1799	1741	1391	1356	1316	232	200	203
8	1740	1788	1894	1426	1401	1395	226	217	237
9	1879	1975	1926	1545	1584	1498	226	204	223
10	2066	2031	2141	1640	1626	1605	254	216	280
11	2167	2205	2137	1728	1790	1729	251	233	227
12	2310	2297	2386	1851	1901	1901	298	234	272
13	2431	2406	2478	2132	2085	1968	297	290	254
14	2579	2609	2622	2177	2208	2113	325	306	308
15	2792	2636	2803	2226	2332	2349	329	289	316
16	2879	2842	2777	2535	2358	2470	334	329	346
17	2987	3031	2975	2562	2609	2524	391	344	419
18	3241	3256	3131	2744	2774	2779	422	371	428
19	3415	3284	3374	2776	2889	2870	442	404	461
20	3395	3472	3425	2925	2879	2993	523	464	451
21	3618	3518	3576	3008	3004	3115	539	490	486
22	3754	3628	3557	3265	3267	3300	642	532	541
23	3867	3619	3826	3439	3420	3358	673	546	606
24	3944	3784	3862	3443	3499	3419	676	606	668
25	4037	3990	3893	3473	3649	3621	726	634	672
26	4145	3921	4103	3590	3673	3624	701	717	724
27	4192	4136	4137	3587	3763	3774	787	710	795
28	4459	4197	4149	3654	3851	3650	851	733	775
29	4316	4218	4359	3742	3897	3843	904	736	843
30	4624	4179	4288	3934	3968	3878	915	716	902
31	4709	4402	4494	4092	4082	3952	917	884	912
32	4845	4622	4520	4122	4190	4136	1000	901	957
33	5060	4682	4721	3992	4336	4099	1002	859	955
34	5035	4697	4710	4138	4144	4211	1083	936	990
35	5141	4753	4997	4275	4315	4187	1039	976	1084
36	5273	4856	5008	4282	4363	4387	1085	1009	1080
37	5423	5045	5111	4151	4337	4404	1061	949	1044
38	5385	5087	5083	4370	4383	4437	1033	1038	1080
39	5441	5151	5168	4322	4415	4378	1131	1022	1119
40	5486	5058	5208	4475	4480	4677	1139	995	1098
41	5594	5181	5149	4359	4585	4463	1118	1092	1150
42	5406	5341	5354	4569	4423	4571	1196	1059	1182
43	5632	5325	5418	4580	4672	4664	1229	1099	1171
44	5734	5377	5373	4594	4752	4760	1172	1108	1191
45	5726	5361	5510	4653	4674	4741	1217	1144	1219
46	5526	5337	5553	4708	4777	4813	1255	1139	1201
47	5902	5500	5341	4796	4740	4796	1268	1200	1251
48	5716	5395	5427	4783	4728	4937	1318	1286	1242
49	5523	5550	5600	4810	4785	4939	1280	1184	1252
50	5933	5492	5519	4787	4785	5025	1373	1254	1317
51	5645	5503	5431	4963	4915	5153	1444	1388	1365
52	5799	5464	5440	4933	4972	5104	1358	1247	1378
53	5644	5695	5640	4965	5000	5137	1423	1302	1496
54	5811	5569	5586	5072	5078	5320	1428	1408	1494
55	5871	5728	5595	5087	5128	5244	1528	1449	1510
56	5820	5872	5438	5168	5241	5398	1528	1451	1571
57	5918	5605	5740	5135	5153	5545	1713	1492	1594
58	5927	5665	5771	4937	5160	5502	1708	1481	1709
59	5810	5669	5620	5113	5245	5612	1781	1623	1728
60	5722	5563	5592	5037	5165	5577	1720	1693	1762
61	5495	5390	5521	4962	5028	5358	1810	1668	1787
62	5763	5460	5353	5034	4949	5470	1965	1626	1809
63	5502	5475	5383	5077	5128	5366	2022	1831	1944
64	5640	5390	5559	4952	5105	5374	2034	1828	2100
65	5648	5298	5275	5088	4952	5477	2081	2015	2089
66	5412	5185	5218	5039	5016	5348	2178	1942	2039
67	5380	5211	5216	4981	4981	5196	2192	2009	2218
68	5359	5265	5131	4886	5055	5338	2335	2044	2276
69	5326	5286	5096	4863	4915	5197	2383	2177	2346
70	5238	4919	5167	4856	5007	5321	2476	2263	2284
71	5102	5116	5086	5036	4911	5274	2553	2384	2435
72	5207	5040	5086	4874	4882	5310	2596	2498	2425

## Sheet: baseline_corrected
time	wt		TrafE-GFP KI
	Mean	SEM	Mean	SEM	Mean	SEM
0	0.815632	0.043501	0.892034	0.0298801	0.965194	0.0286493
1	0.999691	0.0507606	1.02779	0.0408257	1.07631	0.0757358
2	1.02598	0.0656273	1.0041	0.0403091	0.975904	0.0211404
3	1.04583	0.0557343	0.988409	0.0497721	1.01874	0.035304
4	1.11286	0.0590382	1.08767	0.0435049	0.963855	0.0376106
5	1.16777	0.0657251	1.13057	0.0392073	0.912985	0.0210237
6	1.25438	0.0638118	1.21446	0.0398973	0.839357	0.0186582
7	1.3575	0.0696969	1.30091	0.0463463	0.850067	0.0448798
8	1.39771	0.0779326	1.35182	0.0439867	0.910308	0.0303907
9	1.49	0.0771663	1.48149	0.052861	0.874163	0.0334589
10	1.60806	0.0838467	1.55962	0.050598	1.00402	0.0776991
11	1.67792	0.0848549	1.68001	0.0569889	0.951807	0.0354782
12	1.80269	0.0922197	1.81	0.059799	1.07631	0.0781464
13	1.8857	0.0952259	1.98034	0.0785329	1.12584	0.0587332
14	2.0133	0.100648	2.08056	0.0714706	1.25703	0.0363122
15	2.12183	0.113504	2.21151	0.0795111	1.25033	0.0544343
16	2.19066	0.111401	2.35752	0.0899843	1.35074	0.0354435
17	2.31826	0.116086	2.46382	0.0819062	1.54485	0.0939603
18	2.48196	0.127186	2.65657	0.0852133	1.63454	0.0807016
19	2.59667	0.132608	2.73277	0.0932374	1.74967	0.0771224
20	2.65312	0.13313	2.81666	0.0951347	1.92503	0.0981513
21	2.76139	0.139201	2.92232	0.0993612	2.02811	0.0811768
22	2.81991	0.147198	3.14805	0.1008	2.29585	0.149996
23	2.91607	0.156752	3.27132	0.10675	2.44311	0.156421
24	2.98773	0.152877	3.31743	0.108027	2.61044	0.105127
25	3.0728	0.156353	3.43974	0.121407	2.72021	0.122153
26	3.13699	0.164877	3.48585	0.113349	2.86747	0.0675226
27	3.21329	0.160506	3.56173	0.12744	3.06827	0.127313
28	3.30094	0.180336	3.57166	0.130335	3.15797	0.154454
29	3.32362	0.168475	3.67636	0.124896	3.32396	0.209774
30	3.37466	0.197267	3.77177	0.12268	3.3909	0.268264
31	3.50717	0.188134	3.88256	0.13096	3.63186	0.0884078
32	3.60564	0.194132	3.98566	0.128425	3.82597	0.141546
33	3.72835	0.207421	3.97893	0.159919	3.76975	0.18748
34	3.72293	0.204006	4.00006	0.129299	4.02811	0.192997
35	3.83868	0.210102	4.091	0.135194	4.14859	0.154277
36	3.90209	0.215795	4.17264	0.136283	4.249	0.13448
37	4.01603	0.2192	4.12782	0.150166	4.08835	0.165332
38	4.00985	0.213964	4.22323	0.135871	4.21821	0.108773
39	4.06269	0.214791	4.19922	0.136169	4.38019	0.167633
40	4.06063	0.224088	4.36475	0.152926	4.32664	0.195631
41	4.10497	0.232359	4.29271	0.150358	4.49799	0.117972
42	4.1506	0.20707	4.34266	0.14603	4.60107	0.200909
43	4.22123	0.221464	4.45569	0.144622	4.68407	0.181589
44	4.24933	0.230781	4.51652	0.152857	4.64659	0.142043
45	4.27846	0.228088	4.50435	0.145631	4.7925	0.143063
46	4.2318	0.216998	4.578	0.148701	4.81258	0.169859
47	4.3161	0.250553	4.58888	0.14717	4.97858	0.134997
48	4.26325	0.22632	4.62602	0.159041	5.14859	0.141835
49	4.29805	0.214546	4.65356	0.155061	4.97456	0.156769
50	4.36791	0.243732	4.67373	0.167303	5.27979	0.178827
51	4.27382	0.218118	4.81269	0.16835	5.61847	0.153334
52	4.30578	0.232208	4.80565	0.160845	5.33199	0.19989
53	4.37693	0.21819	4.83543	0.161967	5.6506	0.257721
54	4.37358	0.225797	4.95325	0.176116	5.79652	0.162684
55	4.43236	0.228967	4.94973	0.163904	6.00669	0.161071
56	4.41586	0.243851	5.06116	0.173792	6.09103	0.192543
57	4.45014	0.232234	5.06948	0.206279	6.42436	0.291392
58	4.47592	0.230329	4.99456	0.224019	6.55689	0.335686
59	4.40787	0.223678	5.11335	0.21692	6.87015	0.238006
60	4.35064	0.219729	5.05219	0.224391	6.92771	0.169559
61	4.22922	0.212678	4.91419	0.195739	7.04819	0.232941
62	4.27305	0.232833	4.94781	0.220985	7.22892	0.423102
63	4.21736	0.211662	4.98559	0.18029	7.76037	0.278392
64	4.2764	0.220249	4.94077	0.196908	7.98126	0.371151
65	4.18153	0.228014	4.9683	0.218735	8.27979	0.201619
66	4.07687	0.210094	4.9318	0.187662	8.24498	0.327362
67	4.07481	0.207225	4.85336	0.169136	8.59304	0.32247
68	4.0614	0.208438	4.8921	0.200729	8.90897	0.404997
69	4.04929	0.208797	4.79476	0.182286	9.24498	0.323215
70	3.9503	0.21028	4.86168	0.203116	9.40161	0.339202
71	3.94514	0.196392	4.87353	0.18581	9.86881	0.292492
72	3.95262	0.200386	4.8239	0.206679	10.0656	0.294199
