# Supplementary material for: A TRAF-like E3 ubiquitin ligase TrafE coordinates ESCRT and autophagy in endolysosomal damage response and cell-autonomous immunity to Mycobacterium marinum
Source: eLife. 2023 Apr 18;12:e85727. doi: 10.7554/eLife.85727 (PMC10181826; doi:10.7554/eLife.85727)
Supplement: Figure 1—source data 1. [file elife-85727-fig1-data1.xlsx]

## Sheet: Sheet1
vector	hpi	cell nb	infected cell nb	GFP_MCV_coloc	Percentage GFP puncta / Infected
pDM317-trafE	1.5	57	34	14	41.1765
pDM317-trafE	1.5	48	30	12	40
pDM317-trafE	1.5	50	31	11	35.4839
pDM317-trafE	1.5	33	25	8	32
pDM317-trafE	1.5	33	20	7	35
pDM317-trafE	1.5	46	33	16	48.4848
pDM317-trafE	3	43	26	10	38.4615
pDM317-trafE	3	46	36	18	50
pDM317-trafE	3	45	37	16	43.2432
pDM317-trafE	3	45	28	10	35.7143
pDM317-trafE	3	42	23	8	34.7826
pDM317-trafE	3	59	44	14	31.8182
pDM317-trafE	6	51	32	13	40.625
pDM317-trafE	6	55	43	16	37.2093
pDM317-trafE	6	50	39	24	61.5385
pDM317-trafE	6	39	27	9	33.3333
pDM317-trafE	6	49	37	14	37.8378
pDM317-trafE	6	38	31	11	35.4839
pDM317-trafE	24	16	12	7	58.3333
pDM317-trafE	24	12	9	7	77.7778
pDM317-trafE	24	13	13	7	53.8462
pDM317-trafE	24	13	11	7	63.6364
pDM317-trafE	24	18	14	10	71.4286
pDM317-trafE	24	16	12	9	75
