# Supplementary material for: A TRAF-like E3 ubiquitin ligase TrafE coordinates ESCRT and autophagy in endolysosomal damage response and cell-autonomous immunity to Mycobacterium marinum
Source: eLife. 2023 Apr 18;12:e85727. doi: 10.7554/eLife.85727 (PMC10181826; doi:10.7554/eLife.85727)
Supplement: Figure 1—source data 2. [file elife-85727-fig1-data2.xlsx]

## Sheet: Fig1C_trafE_at_Mm_poles
strain	M.m_DdTRAFe_coloc	DdTRAFe_at_M.m_poles	DdTRAFe_at poles_percent
wt (Ax2 (Ka))	21	17	80.9524
wt (Ax2 (Ka))	22	16	72.7273
wt (Ax2 (Ka))	24	19	79.1667
wt (Ax2 (Ka))	20	17	85
wt (Ax2 (Ka))	21	16	76.1905
wt (Ax2 (Ka))	37	28	75.6757
wt (Ax2 (Ka))	11	8	72.7273
wt (Ax2 (Ka))	11	6	54.5455
wt (Ax2 (Ka))	23	15	65.2174
wt (Ax2 (Ka))	17	13	76.4706
