# Supplementary material for: A TRAF-like E3 ubiquitin ligase TrafE coordinates ESCRT and autophagy in endolysosomal damage response and cell-autonomous immunity to Mycobacterium marinum
Source: eLife. 2023 Apr 18;12:e85727. doi: 10.7554/eLife.85727 (PMC10181826; doi:10.7554/eLife.85727)
Supplement: Figure 1—source data 3. [file elife-85727-fig1-data3.xlsx]

## Sheet: Rep_1
well	variable	Cp	gene	dilution	condition	hpi
B1	Cp	18.95	GAPDH	10	ctr	1.5
B2	Cp	18.46	GAPDH	10	ctr	1.5
B3	Cp	18.17	GAPDH	10	ctr	1.5
B4	Cp	18.26	GAPDH	10	mock	1.5
B5	Cp	18.48	GAPDH	10	mock	1.5
B6	Cp	18.01	GAPDH	10	mock	1.5
B7	Cp	19.26	GAPDH	10	infected	1.5
B8	Cp	18.66	GAPDH	10	infected	1.5
B9	Cp	18.74	GAPDH	10	infected	1.5
B10	Cp	18.84	GAPDH	10	mock	6
B11	Cp	18.65	GAPDH	10	mock	6
B12	Cp	18.62	GAPDH	10	mock	6
B13	Cp	18.13	GAPDH	10	infected	6
B14	Cp	18.62	GAPDH	10	infected	6
B15	Cp	18.86	GAPDH	10	infected	6
B16	Cp	18.18	GAPDH	10	mock	12
B17	Cp	18.32	GAPDH	10	mock	12
B18	Cp	18.28	GAPDH	10	mock	12
B19	Cp	17.12	GAPDH	10	infected	12
B20	Cp	18.79	GAPDH	10	infected	12
B21	Cp	18.15	GAPDH	10	infected	12
E1	Cp	23.49	trafE	10	ctr	1.5
E2	Cp	23.18	trafE	10	ctr	1.5
E3	Cp	23.13	trafE	10	ctr	1.5
E4	Cp	23.32	trafE	10	mock	1.5
E5	Cp	23.34	trafE	10	mock	1.5
E6	Cp	23.98	trafE	10	mock	1.5
E7	Cp	22.65	trafE	10	infected	1.5
E8	Cp	22.64	trafE	10	infected	1.5
E9	Cp	21.99	trafE	10	infected	1.5
E10	Cp	23.26	trafE	10	mock	6
E11	Cp	23.66	trafE	10	mock	6
E12	Cp	23.56	trafE	10	mock	6
E13	Cp	22.85	trafE	10	infected	6
E14	Cp	21.99	trafE	10	infected	6
E15	Cp	21.8	trafE	10	infected	6
E16	Cp	22.86	trafE	10	mock	12
E17	Cp	23.03	trafE	10	mock	12
E18	Cp	22.92	trafE	10	mock	12
E19	Cp	22.5	trafE	10	infected	12
E20	Cp	22.47	trafE	10	infected	12
E21	Cp	22.42	trafE	10	infected	12
F1	Cp	23.24	GAPDH	100	ctr	1.5
F2	Cp	21.78	GAPDH	100	ctr	1.5
F3	Cp	21.86	GAPDH	100	ctr	1.5
F4	Cp	21.82	GAPDH	100	mock	1.5
F5	Cp	21.89	GAPDH	100	mock	1.5
F6	Cp	22.03	GAPDH	100	mock	1.5
F7	Cp	21.98	GAPDH	100	infected	1.5
F8	Cp	22.12	GAPDH	100	infected	1.5
F9	Cp	21.62	GAPDH	100	infected	1.5
F10	Cp	22.52	GAPDH	100	mock	6
F11	Cp	21.93	GAPDH	100	mock	6
F12	Cp	22	GAPDH	100	mock	6
F13	Cp	22.47	GAPDH	100	infected	6
F14	Cp	21.96	GAPDH	100	infected	6
F15	Cp	22.16	GAPDH	100	infected	6
F16	Cp	21.49	GAPDH	100	mock	12
F17	Cp	21.67	GAPDH	100	mock	12
F18	Cp	21.74	GAPDH	100	mock	12
F19	Cp	21.42	GAPDH	100	infected	12
F20	Cp	21.56	GAPDH	100	infected	12
F21	Cp	21.55	GAPDH	100	infected	12
I1	Cp	26.82	trafE	100	ctr	1.5
I2	Cp	26.26	trafE	100	ctr	1.5
I3	Cp	26.68	trafE	100	ctr	1.5
I4	Cp	26.87	trafE	100	mock	1.5
I5	Cp	26.69	trafE	100	mock	1.5
I6	Cp	26.8	trafE	100	mock	1.5
I7	Cp	26.63	trafE	100	infected	1.5
I8	Cp	26.07	trafE	100	infected	1.5
I9	Cp	26.33	trafE	100	infected	1.5
I10	Cp	26.53	trafE	100	mock	6
I11	Cp	26.7	trafE	100	mock	6
I12	Cp	26.47	trafE	100	mock	6
I13	Cp	25.59	trafE	100	infected	6
I14	Cp	25.77	trafE	100	infected	6
I15	Cp	25.61	trafE	100	infected	6
I16	Cp	26.23	trafE	100	mock	12
I17	Cp	26.13	trafE	100	mock	12
I18	Cp	26.66	trafE	100	mock	12
I19	Cp	25.71	trafE	100	infected	12
I20	Cp	25.79	trafE	100	infected	12
I21	Cp	25.72	trafE	100	infected	12

## Sheet: Rep_2
well	Cp	gene	dilution	condition	hpi
B1	21.58	GAPDH	10	ctr	1.5
B2	21.23	GAPDH	10	ctr	1.5
B3	21.34	GAPDH	10	ctr	1.5
B4	21.5	GAPDH	10	mock	1.5
B5	21.28	GAPDH	10	mock	1.5
B6	21.18	GAPDH	10	mock	1.5
B7	20.91	GAPDH	10	infected	1.5
B8	20.82	GAPDH	10	infected	1.5
B9	20.87	GAPDH	10	infected	1.5
B10	19.83	GAPDH	10	mock	6
B11	20.08	GAPDH	10	mock	6
B12	20.13	GAPDH	10	mock	6
B13	22.12	GAPDH	10	infected	6
B14	21.99	GAPDH	10	infected	6
B15	22.08	GAPDH	10	infected	6
B16	20.43	GAPDH	10	mock	12
B17	20.68	GAPDH	10	mock	12
B18	20.67	GAPDH	10	mock	12
B19	19.94	GAPDH	10	infected	12
B20	20.04	GAPDH	10	infected	12
B21	20.1	GAPDH	10	infected	12
B22	40	GAPDH	NA	empty	NA
B23	40	GAPDH	NA	empty	NA
B24	40	GAPDH	NA	empty	NA
F1	27.56	trafE	10	ctr	1.5
F2	27.43	trafE	10	ctr	1.5
F3	27.58	trafE	10	ctr	1.5
F4	28.64	trafE	10	mock	1.5
F5	28.55	trafE	10	mock	1.5
F6	28.45	trafE	10	mock	1.5
F7	26.28	trafE	10	infected	1.5
F8	26.26	trafE	10	infected	1.5
F9	26.22	trafE	10	infected	1.5
F10	25.98	trafE	10	mock	6
F11	26.01	trafE	10	mock	6
F12	26.15	trafE	10	mock	6
F13	27.96	trafE	10	infected	6
F14	27.46	trafE	10	infected	6
F15	27.19	trafE	10	infected	6
F16	25.71	trafE	10	mock	12
F17	25.7	trafE	10	mock	12
F18	25.7	trafE	10	mock	12
F19	26.04	trafE	10	infected	12
F20	26.05	trafE	10	infected	12
F21	26.18	trafE	10	infected	12
F22	NA	trafE	NA	empty	NA
F23	40	trafE	NA	empty	NA
F24	40	trafE	NA	empty	NA

## Sheet: Rep_3
well	Cp	gene	condition	hpi
B1	19.29	GAPDH	ctr	1.5
B2	19.29	GAPDH	ctr	1.5
B3	19.24	GAPDH	ctr	1.5
B4	18.14	GAPDH	mock	1.5
B5	18.77	GAPDH	mock	1.5
B6	19.18	GAPDH	mock	1.5
B7	18.57	GAPDH	infected	1.5
B8	18.53	GAPDH	infected	1.5
B9	18.52	GAPDH	infected	1.5
B10	18.29	GAPDH	ctr	6
B11	18.24	GAPDH	ctr	6
B12	18.27	GAPDH	ctr	6
B13	19.19	GAPDH	mock	6
B14	18.71	GAPDH	mock	6
B15	18.84	GAPDH	mock	6
B16	18.45	GAPDH	infected	6
B17	18.44	GAPDH	infected	6
B18	18.73	GAPDH	infected	6
B19	17.66	GAPDH	ctr	12
B20	17.67	GAPDH	ctr	12
B21	17.56	GAPDH	ctr	12
H1	25.16	trafE	ctr	1.5
H2	23.21	trafE	ctr	1.5
H3	23.99	trafE	ctr	1.5
H4	23.5	trafE	mock	1.5
H5	24.48	trafE	mock	1.5
H6	24.65	trafE	mock	1.5
H7	21.23	trafE	infected	1.5
H8	21.43	trafE	infected	1.5
H9	22.21	trafE	infected	1.5
H10	22.18	trafE	ctr	6
H11	22.12	trafE	ctr	6
H12	22.19	trafE	ctr	6
H13	23.26	trafE	mock	6
H14	23.01	trafE	mock	6
H15	23.24	trafE	mock	6
H16	21.64	trafE	infected	6
H17	21.89	trafE	infected	6
H18	21.95	trafE	infected	6
H19	21.83	trafE	ctr	12
H20	21.83	trafE	ctr	12
H21	21.72	trafE	ctr	12
I1	18.26	GAPDH	mock	12
I2	18.14	GAPDH	mock	12
I3	18.58	GAPDH	mock	12
I4	18.72	GAPDH	infected	12
I5	18.71	GAPDH	infected	12
I6	18.63	GAPDH	infected	12
O1	21.95	trafE	mock	12
O2	21.12	trafE	mock	12
O3	21.06	trafE	mock	12
O4	21	trafE	infected	12
O5	21.13	trafE	infected	12
O6	21.1	trafE	infected	12
