# Supplementary material for: A TRAF-like E3 ubiquitin ligase TrafE coordinates ESCRT and autophagy in endolysosomal damage response and cell-autonomous immunity to Mycobacterium marinum
Source: eLife. 2023 Apr 18;12:e85727. doi: 10.7554/eLife.85727 (PMC10181826; doi:10.7554/eLife.85727)
Supplement: Figure 1—source data 4. [file elife-85727-fig1-data4.xlsx]

## Sheet: raw_data
time	wt			trafE OE
0	327	323	327	262	263	289
1	516	527	499	410	440	365
2	562	560	532	446	525	444
3	602	614	637	514	476	501
4	688	620	620	502	503	497
5	653	643	613	526	554	531
6	665	627	671	592	611	578
7	713	725	689	608	557	571
8	727	716	762	559	621	563
9	743	773	792	580	614	589
10	757	762	759	578	617	592
11	812	802	792	627	615	559
12	806	835	848	619	628	637
13	834	855	805	672	707	698
14	927	876	878	641	653	680
15	930	938	954	683	689	696
16	984	956	979	706	717	720
17	977	942	986	701	737	688
18	1049	1069	1045	704	780	747
19	1100	1080	1101	768	825	762
20	1121	1112	1164	785	820	790
21	1246	1154	1189	835	841	852
22	1212	1232	1261	859	846	838
23	1258	1202	1229	883	856	845
24	1262	1307	1298	885	932	923
25	1357	1347	1203	951	995	964
26	1343	1424	1370	980	965	995
27	1351	1330	1367	1038	1055	956
28	1542	1416	1437	1004	1056	1058
29	1511	1493	1514	1099	1051	1021
30	1504	1512	1484	1142	1091	1118
31	1637	1562	1590	1071	1154	1103
32	1640	1657	1599	1155	1175	1159
33	1752	1741	1636	1195	1161	1133
34	1776	1777	1747	1279	1270	1161
35	1782	1768	1746	1220	1252	1248
36	1804	1773	1861	1278	1329	1243
37	1997	1828	1844	1285	1236	1300
38	2006	1957	2060	1303	1332	1293
39	2121	1969	2022	1340	1379	1271
40	2021	2038	2039	1411	1465	1385
41	2234	2125	2152	1383	1396	1393
42	2195	2111	2202	1432	1444	1454
43	2332	2185	2115	1430	1520	1462
44	2305	2283	2281	1554	1526	1540
45	2488	2371	2347	1612	1465	1544
46	2582	2438	2331	1518	1501	1589
47	2585	2513	2485	1669	1600	1604
48	2774	2592	2508	1666	1628	1654
49	2876	2741	2591	1790	1665	1678
50	2960	2857	2789	1809	1687	1700
51	2977	2743	2836	1803	1741	1755
52	3074	2890	2847	1848	1817	1852
53	3210	2977	3014	1877	1871	1791
54	3380	3180	3111	2027	1889	1928
55	3421	3325	3104	2037	2040	1859
56	3678	3494	3279	2040	2020	2061
57	3664	3471	3310	2061	2055	2060
58	3820	3623	3448	2218	2108	2130
59	3984	3608	3499	2344	2158	2189
60	4217	3862	3741	2274	2188	2201
61	4366	4056	3938	2397	2336	2248
62	4470	4248	4018	2499	2418	2419
63	4617	4198	4088	2611	2444	2543
64	4662	4362	4179	2657	2546	2508
65	4947	4518	4239	2706	2611	2553
66	5132	4669	4517	2853	2625	2679
67	5264	4789	4619	2877	2802	2780
68	5483	4891	4634	3011	2764	2727
69	5551	5220	5049	3160	2939	2925
70	5826	5280	5115	3290	3031	3034
71	5981	5413	5219	3405	3104	3102
72	6049	5516	5482	3614	3314	3259

## Sheet: baseline_corrected
time	wt		trafE OE
	Mean	SEM	Mean	SEM		base line corrected: value / mean of the first time point
0	0.614156	0.0649711	0.632282	0.066648
1	0.969324	0.103612	0.943763	0.107381
2	1.03973	0.111417	1.09911	0.126508
3	1.16482	0.124647	1.15815	0.118976
4	1.21197	0.13506	1.16669	0.117041
5	1.20003	0.128863	1.25136	0.127047
6	1.23397	0.133005	1.38341	0.140465
7	1.33706	0.142743	1.34845	0.139753
8	1.3861	0.14884	1.35389	0.143531
9	1.45084	0.155709	1.38496	0.14085
10	1.43198	0.1514	1.38807	0.141669
11	1.51245	0.160251	1.39894	0.148502
12	1.56462	0.167045	1.46341	0.147206
13	1.56776	0.167968	1.61333	0.163574
14	1.68532	0.180909	1.53332	0.156047
15	1.77395	0.187996	1.60634	0.161273
16	1.83493	0.19465	1.6646	0.16717
17	1.82613	0.194692	1.65139	0.169037
18	1.98831	0.21065	1.73295	0.181136
19	2.06248	0.218406	1.82927	0.189256
20	2.1354	0.227752	1.86034	0.188229
21	2.2561	0.243792	1.96365	0.197197
22	2.32902	0.247657	1.9753	0.198536
23	2.31896	0.247026	2.00715	0.202928
24	2.43085	0.25827	2.12832	0.215987
25	2.456	0.276056	2.26037	0.228633
26	2.60058	0.278551	2.28367	0.229825
27	2.54463	0.269751	2.36834	0.247877
28	2.76276	0.301158	2.42194	0.246267
29	2.84008	0.300479	2.4631	0.252535
30	2.82877	0.299441	2.60292	0.26319
31	3.01044	0.320897	2.58506	0.2652
32	3.0777	0.326959	2.71011	0.272061
33	3.22416	0.347884	2.71011	0.274881
34	3.33166	0.352678	2.88178	0.302111
35	3.32914	0.352478	2.88954	0.290624
36	3.41841	0.364613	2.99052	0.305393
37	3.56362	0.390165	2.968	0.300929
38	3.78615	0.404145	3.05111	0.307085
39	3.84209	0.414743	3.09927	0.319294
40	3.83329	0.405367	3.30977	0.336315
41	4.09291	0.437054	3.24064	0.325002
42	4.09102	0.435963	3.36337	0.337502
43	4.16897	0.456902	3.42706	0.349002
44	4.31795	0.456681	3.58863	0.360252
45	4.5298	0.485838	3.58941	0.373201
46	4.62095	0.507365	3.57931	0.364279
47	4.76678	0.507017	3.78515	0.383022
48	4.94971	0.543776	3.84341	0.386186
49	5.15967	0.567086	3.98711	0.410261
50	5.40986	0.579508	4.03604	0.414531
51	5.37843	0.582845	4.11605	0.414945
52	5.53872	0.600036	4.28538	0.430381
53	5.78388	0.62643	4.30247	0.436132
54	6.07933	0.660405	4.53938	0.465028
55	6.19185	0.678048	4.61084	0.482811
56	6.56965	0.72772	4.75454	0.477439
57	6.56588	0.720407	4.79727	0.480944
58	6.84624	0.751548	5.01476	0.508791
59	6.97196	0.787359	5.1973	0.538
60	7.43022	0.830355	5.17555	0.522582
61	7.76968	0.855873	5.42256	0.552872
62	8.00603	0.881368	5.69831	0.574666
63	8.11101	0.909686	5.90182	0.602347
64	8.2996	0.916643	5.98959	0.609423
65	8.61453	0.989975	6.1131	0.621585
66	9.0005	1.01336	6.33603	0.655099
67	9.22303	1.04069	6.57061	0.662245
68	9.43425	1.10422	6.60401	0.693873
69	9.94468	1.08736	7.00948	0.724733
70	10.1968	1.15153	7.26658	0.755436
71	10.4432	1.18516	7.46543	0.784311
72	10.716	1.18452	7.91285	0.833873
