# Supplementary material for: A TRAF-like E3 ubiquitin ligase TrafE coordinates ESCRT and autophagy in endolysosomal damage response and cell-autonomous immunity to Mycobacterium marinum
Source: eLife. 2023 Apr 18;12:e85727. doi: 10.7554/eLife.85727 (PMC10181826; doi:10.7554/eLife.85727)
Supplement: Figure 2—source data 1. [file elife-85727-fig2-data1.xlsx]

## Sheet: raw_data
time	wt			atg1 KO			TrafE KO			TrafE KO TrafE OE
0	97	74	81	151	136	123	142	155	140	74	55	68
1	101	83	81	152	165	151	130	141	144	57	50	76
2	113	86	90	145	139	137	121	125	99	53	59	63
3	119	90	88	111	127	133	123	114	99	58	60	57
4	126	92	102	131	129	122	107	106	103	67	64	50
5	119	98	99	133	106	137	116	106	123	59	56	57
6	109	86	108	135	118	141	123	111	104	51	53	55
7	107	101	95	113	118	120	116	94	102	53	57	47
8	123	107	109	117	115	123	124	92	132	71	55	57
9	116	97	111	140	120	118	119	118	124	55	57	51
10	111	101	124	127	144	134	119	133	138	68	52	56
11	118	112	106	141	143	143	124	123	144	44	49	52
12	115	107	106	153	144	135	155	137	129	53	48	60
13	118	116	111	155	137	149	136	138	157	54	46	47
14	98	119	110	152	149	146	162	155	164	54	53	55
15	127	110	105	140	149	149	151	169	174	55	54	56
16	123	106	104	165	166	172	187	166	177	53	47	55
17	111	126	120	167	157	161	193	183	199	54	58	45
18	130	109	126	167	162	184	205	199	193	53	67	54
19	139	107	126	180	167	185	206	205	227	60	47	52
20	110	118	129	173	172	182	243	212	229	66	47	60
21	116	120	115	185	188	209	252	204	252	57	61	76
22	141	124	125	161	197	204	237	240	260	53	53	45
23	115	128	118	201	211	218	260	238	256	60	53	63
24	118	122	100	203	217	231	259	239	261	71	52	50
25	131	133	116	223	201	204	245	243	263	54	47	51
26	128	133	116	207	199	246	301	264	309	67	41	65
27	138	107	124	243	223	253	292	257	302	65	54	74
28	138	135	127	223	240	240	303	272	318	65	60	59
29	137	126	123	236	260	286	307	306	348	67	64	75
30	139	144	121	248	249	260	316	298	316	66	64	57
31	150	132	123	268	229	281	324	308	338	68	55	54
32	146	128	131	271	246	249	345	312	359	62	61	54
33	125	134	137	287	280	284	357	325	342	70	72	69
34	125	140	144	290	273	317	368	344	334	73	76	64
35	144	118	137	282	284	298	352	342	368	72	68	83
36	159	125	138	282	314	318	374	352	382	77	59	62
37	156	128	150	317	289	353	404	372	383	66	64	75
38	133	145	130	296	306	322	402	373	420	80	63	74
39	163	143	128	336	314	343	423	417	425	74	60	68
40	155	134	145	332	350	347	417	406	499	72	64	81
41	162	137	144	349	342	343	414	414	455	85	65	69
42	154	132	128	342	380	395	458	449	472	73	72	77
43	140	146	145	383	387	394	457	426	484	73	73	71
44	140	146	145	375	402	422	494	467	469	94	72	81
45	155	153	144	411	361	416	489	458	495	91	76	62
46	147	152	140	424	414	415	514	483	476	98	75	92
47	178	160	153	410	407	410	518	466	553	103	76	91
48	166	150	147	462	409	438	539	503	553	88	78	78
49	158	149	143	448	471	480	538	569	578	102	83	90
50	194	145	158	441	460	455	517	522	543	94	81	90
51	158	161	151	469	495	496	545	562	553	97	74	81
52	169	152	146	485	494	498	589	536	601	101	83	81
53	171	152	165	490	500	530	605	566	580	113	86	90
54	156	155	168	491	537	501	592	587	613	119	90	88
55	190	160	179	543	568	530	599	601	608	126	92	102
56	191	186	156	522	533	554	608	602	632	119	98	99
57	191	158	159	546	563	598	617	572	635	109	86	108
58	194	159	155	545	559	623	641	588	694	107	101	95
59	198	176	152	563	578	640	662	612	684	123	107	109
60	196	200	172	586	601	630	689	634	678	116	97	111
61	190	172	170	671	618	651	681	641	682	111	101	124
62	228	164	192	679	660	645	695	656	745	118	112	106
63	210	172	193	681	684	677	721	685	773	115	107	106
64	218	185	181	661	688	700	720	697	731	118	116	111
65	224	176	198	701	703	692	754	719	775	120	115	116
66	220	208	189	741	755	731	795	726	823	130	111	122
67	232	195	190	752	780	795	756	754	847	119	106	124
68	248	181	206	767	793	824	816	771	816	121	115	106
69	219	220	203	767	844	831	847	755	862	155	127	132
70	247	231	226	828	843	870	814	794	862	143	124	143
71	225	247	204	820	807	871	823	781	873	126	125	130
72	265	207	236	869	871	877	863	777	904	125	121	131

## Sheet: baseline_corrected
time	wt		atg1 KO		TrafE KO		TrafE KO TrafE OE
	Mean	SEM	Mean	SEM	Mean	SEM	Mean	SEM		base line corrected: value / mean of the first time point
0	0.885453	0.0808635	0.999025	0.0721962	1.18172	0.0847303	1.08123	0.0953772
1	0.931131	0.0776643	1.14035	0.0576314	1.12223	0.0797129	1.00439	0.129809
2	1.01546	0.098455	1.02583	0.0460137	0.932937	0.0886981	0.960483	0.0523515
3	1.04357	0.114368	0.903996	0.0608942	0.908599	0.081294	0.960483	0.0257326
4	1.12439	0.11641	0.930799	0.0434369	0.854516	0.0555707	0.993414	0.0890126
5	1.11033	0.0859321	0.916179	0.0806662	0.932937	0.0718961	0.944018	0.0254328
6	1.06465	0.0909388	0.960039	0.0641809	0.914008	0.0738232	0.872667	0.027093
7	1.06465	0.0578254	0.855263	0.0385832	0.843699	0.0750866	0.86169	0.0515035
8	1.19115	0.0730165	0.86501	0.0399332	0.941049	0.116008	1.00439	0.0858
9	1.13844	0.0767557	0.921053	0.0639851	0.976203	0.0642875	0.894621	0.0351424
10	1.1806	0.0860131	0.986842	0.0545337	1.05462	0.0817736	0.965971	0.0819886
11	1.1806	0.061689	1.04045	0.0434072	1.05733	0.0875269	0.795829	0.0422596
12	1.15249	0.057071	1.05263	0.0578534	1.13845	0.0959312	0.883644	0.0605428
13	1.21223	0.0555685	1.07456	0.0589968	1.16549	0.092276	0.806806	0.0451162
14	1.14898	0.080329	1.08918	0.0468946	1.3007	0.0861665	0.889133	0.0218429
15	1.20169	0.0865293	1.06725	0.0493806	1.33586	0.102591	0.905598	0.0221714
16	1.17006	0.0804076	1.22563	0.0532629	1.43321	0.104115	0.850714	0.043823
17	1.25439	0.0700144	1.18177	0.0533985	1.55489	0.106505	0.86169	0.0661033
18	1.2825	0.0867318	1.25	0.0710934	1.61439	0.10711	0.954995	0.0771928
19	1.3071	0.112353	1.2963	0.0665256	1.72526	0.124845	0.872667	0.0652569
20	1.25439	0.078494	1.28411	0.0580875	1.84965	0.138961	0.949506	0.0946887
21	1.23331	0.054379	1.41813	0.0806353	1.91455	0.178529	1.06476	0.0980905
22	1.37034	0.0818603	1.3694	0.112715	1.99297	0.140393	0.82876	0.0475805
23	1.26845	0.0676005	1.53509	0.0731445	2.03894	0.141609	0.965971	0.0532562
24	1.19466	0.0872809	1.58626	0.0884051	2.05246	0.143227	0.949506	0.112164
25	1.33521	0.0797474	1.53021	0.0809901	2.03083	0.139882	0.834248	0.0381449
26	1.32467	0.0770684	1.58869	0.124902	2.36344	0.188519	0.949506	0.139135
27	1.29656	0.109123	1.75195	0.0971134	2.30124	0.18427	1.05928	0.0980614
28	1.40548	0.0685652	1.71296	0.082211	2.41482	0.189672	1.00988	0.0378516
29	1.35629	0.0726297	1.90546	0.131826	2.5987	0.200701	1.13063	0.0595594
30	1.41954	0.0948366	1.84454	0.0814671	2.51487	0.168206	1.02634	0.0503347
31	1.42305	0.102917	1.89571	0.138637	2.62304	0.182059	0.97146	0.0772933
32	1.42305	0.0838828	1.86647	0.0964677	2.74743	0.209082	0.97146	0.0466766
33	1.39143	0.0698455	2.07359	0.0872309	2.76906	0.192491	1.15807	0.0294439
34	1.4371	0.0859024	2.14425	0.129117	2.82856	0.198728	1.16905	0.0647535
35	1.40197	0.100946	2.10526	0.094714	2.87182	0.193853	1.22393	0.0786458
36	1.48278	0.12166	2.2271	0.124334	2.99621	0.205163	1.08672	0.0947742
37	1.52495	0.110337	2.33674	0.166488	3.13413	0.21462	1.12514	0.0610082
38	1.43359	0.0773212	2.25146	0.108514	3.23148	0.234817	1.191	0.0860897
39	1.52495	0.124678	2.41959	0.118913	3.42077	0.219874	1.10867	0.0711306
40	1.52495	0.0906151	2.50731	0.111627	3.57491	0.330204	1.191	0.0850335
41	1.55657	0.102265	2.51949	0.105663	3.46944	0.248257	1.20198	0.104059
42	1.45467	0.104941	2.72173	0.161321	3.72904	0.244839	1.21844	0.0368627
43	1.51441	0.0667117	2.83626	0.119905	3.69659	0.272929	1.191	0.028538
44	1.51441	0.0667117	2.92154	0.156774	3.86696	0.257407	1.35565	0.109336
45	1.58819	0.0757985	2.89474	0.175718	3.89941	0.266415	1.25686	0.140644
46	1.54252	0.0746046	3.05312	0.128687	3.98323	0.272042	1.45445	0.117888
47	1.72523	0.106957	2.98977	0.124159	4.1563	0.335929	1.48189	0.13271
48	1.62684	0.0925121	3.18957	0.17329	4.31314	0.301412	1.33919	0.0623673
49	1.58117	0.0809039	3.40887	0.157548	4.55652	0.307834	1.50933	0.0972554
50	1.74631	0.171096	3.30409	0.143142	4.27799	0.281409	1.45445	0.0710019
51	1.65144	0.0762399	3.5575	0.16101	4.48891	0.290141	1.3831	0.116178
52	1.6409	0.100237	3.59893	0.15182	4.66739	0.339909	1.45445	0.109543
53	1.71469	0.0933206	3.7037	0.176899	4.73499	0.316957	1.58617	0.142896
54	1.68306	0.0834419	3.72563	0.18515	4.84586	0.316905	1.63008	0.168823
55	1.85875	0.121074	3.99854	0.184719	4.88913	0.313799	1.75631	0.170593
56	1.8728	0.139617	3.92057	0.176421	4.98107	0.327456	1.73436	0.118968
57	1.78496	0.136751	4.15936	0.205557	4.9324	0.350459	1.66301	0.12894
58	1.78496	0.150668	4.20809	0.247458	5.20011	0.415286	1.66301	0.0678694
59	1.84821	0.1602	4.33967	0.249091	5.29475	0.380494	1.86059	0.0925292
60	1.99578	0.124735	4.42739	0.206396	5.41103	0.372284	1.77827	0.101552
61	1.86929	0.1034	4.7271	0.22619	5.41915	0.363833	1.84413	0.116974
62	2.052	0.213525	4.83431	0.212922	5.66793	0.41874	1.84413	0.0701214
63	2.02038	0.143736	4.97563	0.206801	5.89237	0.430413	1.80022	0.0615176
64	2.052	0.150799	4.99269	0.223487	5.80855	0.380655	1.89352	0.0541185
65	2.10119	0.170921	5.10721	0.213164	6.07896	0.411131	1.92645	0.0494786
66	2.16796	0.131855	5.42641	0.230639	6.33856	0.46836	1.99232	0.100824
67	2.16796	0.166825	5.67008	0.252462	6.37372	0.477945	1.91548	0.0979636
68	2.2312	0.226468	5.80897	0.269253	6.49811	0.43346	1.87706	0.082914
69	2.2558	0.111337	5.95029	0.301846	6.66306	0.505577	2.27223	0.150593
70	2.47365	0.123733	6.19152	0.271939	6.67929	0.457885	2.25027	0.11555
71	2.37526	0.164714	6.08674	0.289921	6.69822	0.480042	2.09111	0.0526474
72	2.4877	0.205245	6.37671	0.264936	6.87939	0.534927	2.06915	0.0662106
