# Supplementary material for: A TRAF-like E3 ubiquitin ligase TrafE coordinates ESCRT and autophagy in endolysosomal damage response and cell-autonomous immunity to Mycobacterium marinum
Source: eLife. 2023 Apr 18;12:e85727. doi: 10.7554/eLife.85727 (PMC10181826; doi:10.7554/eLife.85727)
Supplement: Figure 2—source data 2. [file elife-85727-fig2-data2.xlsx]

## Sheet: 2020.11.26_data_count
infected	Mmarinum_Plin_colocalisation	Strain	Proportion_Mmarinum_Plin_colocalisation	hpi	Percent Plin-positive Mm	Bio Rep
13	1	wt	0.0769231	6	7.69231	1
10	1	wt	0.1	6	10	1
9	2	wt	0.222222	6	22.2222	1
11	5	wt	0.454545	6	45.4545	2
14	2	wt	0.142857	6	14.2857	2
13	3	wt	0.230769	6	23.0769	2
13	4	wt	0.307692	6	30.7692	3
9	2	wt	0.222222	6	22.2222	3
14	1	wt	0.0714286	6	7.14286	3
12	1	wt	0.0833333	6	8.33333	4
16	6	atg1.KO	0.375	6	37.5	1
12	4	atg1.KO	0.333333	6	33.3333	1
10	4	atg1.KO	0.4	6	40	1
14	7	atg1.KO	0.5	6	50	2
9	5	atg1.KO	0.555556	6	55.5556	2
11	4	atg1.KO	0.363636	6	36.3636	2
8	5	atg1.KO	0.625	6	62.5	3
8	3	atg1.KO	0.375	6	37.5	3
13	5	atg1.KO	0.384615	6	38.4615	3
9	6	atg1.KO	0.666667	6	66.6667	4
8	4	TrafE.KO	0.5	6	50	1
4	1	TrafE.KO	0.25	6	25	1
6	3	TrafE.KO	0.5	6	50	1
7	5	TrafE.KO	0.714286	6	71.4286	2
8	3	TrafE.KO	0.375	6	37.5	2
4	2	TrafE.KO	0.5	6	50	2
9	5	TrafE.KO	0.555556	6	55.5556	3
6	3	TrafE.KO	0.5	6	50	3
3	1	wt	0.333333	24	33.3333	1
2	0	wt	0	24	0	1
3	1	wt	0.333333	24	33.3333	1
3	1	wt	0.333333	24	33.3333	2
5	2	wt	0.4	24	40	2
2	0	wt	0	24	0	2
3	0	wt	0	24	0	3
4	2	wt	0.5	24	50	3
5	1	wt	0.2	24	20	3
1	0	wt	0	24	0	4
4	2	atg1.KO	0.5	24	50	1
4	2	atg1.KO	0.5	24	50	1
4	2	atg1.KO	0.5	24	50	1
4	1	atg1.KO	0.25	24	25	2
4	3	atg1.KO	0.75	24	75	2
7	4	atg1.KO	0.571429	24	57.1429	2
2	0	atg1.KO	0	24	0	3
5	1	atg1.KO	0.2	24	20	3
4	1	atg1.KO	0.25	24	25	3
5	3	atg1.KO	0.6	24	60	4
3	2	TrafE.KO	0.666667	24	66.6667	1
6	4	TrafE.KO	0.666667	24	66.6667	1
2	1	TrafE.KO	0.5	24	50	1
5	2	TrafE.KO	0.4	24	40	2
4	2	TrafE.KO	0.5	24	50	2
5	3	TrafE.KO	0.6	24	60	2
4	2	TrafE.KO	0.5	24	50	3
5	2	TrafE.KO	0.4	24	40	3
5	2	TrafE.KO	0.4	24	40	3
6	3	TrafE.KO	0.5	24	50	4
