# Supplementary material for: A TRAF-like E3 ubiquitin ligase TrafE coordinates ESCRT and autophagy in endolysosomal damage response and cell-autonomous immunity to Mycobacterium marinum
Source: eLife. 2023 Apr 18;12:e85727. doi: 10.7554/eLife.85727 (PMC10181826; doi:10.7554/eLife.85727)
Supplement: Figure 2—source data 3. [file elife-85727-fig2-data3.xlsx]

## Sheet: Sheet1
well	time	Dicty_total	Inf_Dicty	NotInf_Dicty	bactInDicty	bactNotInDicty	strain	bio rep
B02	1	8061.32	22.5556	3563.84	213.011	16.1574	wt	1
B02	2	8848.73	23.2222	4400.82	209.759	22.643	wt	1
B02	3	9188.55	23.1111	4813.99	206.816	29.1675	wt	1
B02	4	8839.11	21.4444	4809.95	192.64	58.6675	wt	1
B02	5	9537.09	21.7778	5267.38	200.019	72.661	wt	1
B02	6	10113.9	20.7778	5912.06	200.415	94.9913	wt	1
B02	7	10216.4	21.4444	6017.38	206.36	105.194	wt	1
B02	8	10648	21.5556	6479.61	202.367	144.205	wt	1
B02	9	11133.9	21.6667	6922.33	204.618	166.335	wt	1
B02	10	11625.7	23	7090	210.238	205.765	wt	1
B02	11	12349.9	23.2222	7701.62	200.681	233.28	wt	1
B02	12	12683.2	24	7903.88	214.162	265.497	wt	1
B02	13	13144.2	22.1111	8584.49	206.467	302.243	wt	1
B02	14	13529.5	22.4444	9219.85	201.512	340.339	wt	1
B02	15	14132.1	23.8889	9309.1	199.962	372.792	wt	1
B02	16	14758.2	24.1111	9857.49	211.941	419.598	wt	1
B02	17	16166.1	27.6667	10566.4	237.364	438.799	wt	1
B02	18	16581.2	26.6667	11057	233.682	469.593	wt	1
B02	19	17427.6	27.4444	11532.8	228.139	529.281	wt	1
B02	20	17937	31	11833	257.675	523.092	wt	1
B02	21	18675.7	32.6667	12207.8	266.777	528.47	wt	1
B02	22	19703.7	35	12578	292.157	592.893	wt	1
B02	23	21250	39.2222	13229.1	322.578	637.418	wt	1
B02	24	21397.3	41	12573.8	324.663	683.033	wt	1
B02	25	22799.8	43.4444	13557	347.718	726.982	wt	1
B02	26	23280.4	48.3333	13450.4	355.896	787.023	wt	1
B02	27	23874.1	49.7778	14122.4	373.005	842.844	wt	1
B02	28	25107.5	54.7778	13991.4	409.1	887.272	wt	1
B02	29	25985.5	56.4444	14244.3	410.406	949.418	wt	1
B02	30	25443.7	61.1111	13248.6	434.097	1024.17	wt	1
B02	31	26665.3	61.3333	14433.2	463.141	1037.32	wt	1
B02	32	26927	66.6667	13781.3	468.289	1120.29	wt	1
B02	33	26449.6	68.1111	13490.5	483.52	1233.03	wt	1
B02	34	26568.1	73.1111	12626	499.635	1318.32	wt	1
B02	35	27063.5	77.2222	12642.5	490.819	1404.84	wt	1
B02	36	26346.9	77.3333	11708.8	486.15	1503.35	wt	1
B02	37	26971.7	84.8889	10910.4	526.182	1593.88	wt	1
B02	38	25760.7	78.5556	11193.5	512.966	1680.03	wt	1
B02	39	24071.3	79.3333	9869.57	515.015	1782.03	wt	1
B02	40	22917.6	78.7778	8949.01	455.047	1952.77	wt	1
B03	1	7325.79	21.7778	2640.9	228.551	9.92146	wt	2
B03	2	7735.66	23.4444	3097.24	223.879	13.5911	wt	2
B03	3	7981.54	22.8889	3650.84	213.247	34.9234	wt	2
B03	4	7800.54	20.1111	3982.74	202.812	55.4651	wt	2
B03	5	8384.79	22.1111	4117.22	214.528	68.5008	wt	2
B03	6	8914.67	20.3333	4737.96	199.414	87.7352	wt	2
B03	7	9365.97	22.3333	5055.79	210.278	106.009	wt	2
B03	8	10351	22.5556	5961.16	213.354	119.184	wt	2
B03	9	10546.5	22	6206.08	215.555	146.749	wt	2
B03	10	10825.6	23	6352.94	216.184	191.233	wt	2
B03	11	11808.1	25.8889	6622.88	240.356	188.247	wt	2
B03	12	12345.6	25.1111	7256.37	239.685	212.276	wt	2
B03	13	12084.8	23.3333	7418.35	220.923	240.918	wt	2
B03	14	12530.8	24.5556	7599.88	228.614	269.9	wt	2
B03	15	13481.8	25.3333	8423.01	228.837	276.165	wt	2
B03	16	14267.2	25.5556	9287.93	232.432	302.752	wt	2
B03	17	14925.2	24.8889	9805.55	226.815	330.423	wt	2
B03	18	15789.7	25.5556	10553.6	232.073	347.572	wt	2
B03	19	16811.7	27.5556	11175.2	243.063	361.27	wt	2
B03	20	17584.2	27.5556	11825.7	237.51	357.911	wt	2
B03	21	18489.9	29.8889	12093.8	261.081	353.784	wt	2
B03	22	19183.5	28	13182.7	244.527	376.114	wt	2
B03	23	20355.4	30.6667	13689.6	261.081	362.071	wt	2
B03	24	21850.1	30.4444	15487.1	258.035	379.872	wt	2
B03	25	22056.3	32.4444	15013.4	273.97	384.827	wt	2
B03	26	23110.5	33.8889	15783.7	278.413	408.308	wt	2
B03	27	23569.6	32.4444	16645.6	268.267	423.695	wt	2
B03	28	24867.7	32.5556	17928.5	262.91	421.211	wt	2
B03	29	25623.9	35	18164.7	280.135	416.352	wt	2
B03	30	26291.7	36.8889	18416	286.404	444.366	wt	2
B03	31	26997.1	37.3333	18851.8	295.908	473.011	wt	2
B03	32	28288.7	39.7778	19496	317.597	446.328	wt	2
B03	33	28416.4	41.3333	19611.2	296.776	482.815	wt	2
B03	34	28773.8	43.6667	19407	313.13	513.439	wt	2
B03	35	29658.3	45.6667	19965.6	315.262	528.157	wt	2
B03	36	29646.3	49	19168.6	315.059	537.442	wt	2
B03	37	29382.2	49.3333	19727.7	318.142	572.053	wt	2
B03	38	29439.7	55.2222	18409.2	347.429	594.746	wt	2
B03	39	30326.9	60	18118.1	363.701	629.041	wt	2
B03	40	28990.7	61.6667	16897.6	361.512	672.288	wt	2
B04	1	7637.41	19.2222	3595.82	205.552	9.28547	wt	3
B04	2	8149.56	20.2222	4229.84	195.453	26.3442	wt	3
B04	3	8335.69	20.5556	4403.89	193.099	40.1481	wt	3
B04	4	8151.49	20	4350.42	191.263	54.0684	wt	3
B04	5	9046.48	18.7778	5487.13	178.862	79.5114	wt	3
B04	6	9552.09	20.1111	5670.38	186.248	99.4906	wt	3
B04	7	9859.27	18.7778	6169.76	182.594	108.672	wt	3
B04	8	10533.5	20	6588.84	176.255	124.225	wt	3
B04	9	11223.5	20.4444	7371.91	185.507	157.427	wt	3
B04	10	11525.4	20.8889	7304.6	191.01	169.804	wt	3
B04	11	12339.7	20.7778	8250.09	181.519	203.304	wt	3
B04	12	12741.2	21.3333	8534.25	200.581	220.607	wt	3
B04	13	12920.7	22.1111	8478.46	204.545	258.779	wt	3
B04	14	13651.2	23.3333	9020.34	208.352	288.851	wt	3
B04	15	13998.2	20.6667	9763.55	190.132	331.696	wt	3
B04	16	15069.9	23.8889	10641.7	215.921	331.943	wt	3
B04	17	15598.7	23.4444	10814.2	195.746	357.422	wt	3
B04	18	16471.5	26.4444	11161.7	225.778	383.347	wt	3
B04	19	17559.1	29.5556	11583.9	257.536	375.562	wt	3
B04	20	18471.3	29.6667	12493.5	251.267	405.039	wt	3
B04	21	19487	29.6667	13546.4	253.825	437.695	wt	3
B04	22	20165.7	32.1111	13592.2	270.262	447.781	wt	3
B04	23	20949.1	33.2222	14158.1	264.968	486.187	wt	3
B04	24	21973	35.1111	14574.2	290.94	492.964	wt	3
B04	25	22491.4	36.6667	14652.8	283.877	529.76	wt	3
B04	26	22773.1	36.5556	15245.6	286.061	558.638	wt	3
B04	27	23303.3	38.2222	15683.2	292.453	585.674	wt	3
B04	28	24214.5	40.4444	15790.3	311.035	593.076	wt	3
B04	29	25185.7	40.2222	17140.7	285.815	653.154	wt	3
B04	30	26206.5	46.5556	16566.7	347.186	607.163	wt	3
B04	31	26828.4	46.2222	17417.9	329.698	642.526	wt	3
B04	32	26495.9	47.5556	16697.9	351.094	700.116	wt	3
B04	33	27480.3	51.2222	17072.5	373.225	715.007	wt	3
B04	34	27626.7	53.3333	16878.5	363.112	750.011	wt	3
B04	35	27449.6	56.2222	16448.6	369.929	812.489	wt	3
B04	36	27378.3	58	16090.5	387.045	873.94	wt	3
B04	37	27760.7	56.5556	16804.6	351.164	951.865	wt	3
B04	38	27211	61.3333	15596.8	387.747	995.325	wt	3
B04	39	26187.3	59.8889	14866.3	391.235	1066.1	wt	3
B04	40	26279.6	61.6667	14556.1	376.773	1106.53	wt	3
B04	1	10144	24.4444	4076.66	306.074	14.2894	trafE.KO	1
B04	2	10840	25.6667	4992.65	302.928	26.5038	trafE.KO	1
B04	3	11152.9	25	5718.66	305.821	49.0037	trafE.KO	1
B04	4	11137.6	26.8889	5346.79	322.645	69.851	trafE.KO	1
B04	5	12223.8	28.3333	6169.22	334.447	82.0287	trafE.KO	1
B04	6	12892.3	30.3333	6273.37	352.331	83.0929	trafE.KO	1
B04	7	13536.9	30.6667	6767.1	352.653	111.848	trafE.KO	1
B04	8	14000.5	30.3333	7596.14	331.972	158.684	trafE.KO	1
B04	9	14883.8	31.3333	8212.74	340.589	163.13	trafE.KO	1
B04	10	15946.8	31.7778	9246.48	327.4	211.242	trafE.KO	1
B04	11	16957.6	32.6667	9763.37	334.806	240.978	trafE.KO	1
B04	12	17735.8	35.2222	9889.51	356.205	257.276	trafE.KO	1
B04	13	19014.3	35.2222	11446.1	355.463	281.928	trafE.KO	1
B04	14	19270.4	36	11547.3	354.166	332.285	trafE.KO	1
B04	15	20480.1	38.1111	12403.3	364.382	355.986	trafE.KO	1
B04	16	21930.9	36.7778	13472.8	368.895	373.281	trafE.KO	1
B04	17	22587.2	36.6667	14750	362.68	410.46	trafE.KO	1
B04	18	24381.2	38.1111	15850.5	378.978	422.331	trafE.KO	1
B04	19	25377.8	41.5556	16475	374.748	460.707	trafE.KO	1
B04	20	25868.9	41.7778	16371.3	387.584	468.429	trafE.KO	1
B04	21	26734.4	40.2222	17860.9	371.226	494.081	trafE.KO	1
B04	22	27558.2	42	18266.6	379.812	518.942	trafE.KO	1
B04	23	28309.7	42.7778	19058.8	388.485	525.374	trafE.KO	1
B04	24	28244.7	43.4444	18589.7	375.812	558.515	trafE.KO	1
B04	25	27533.4	39.3333	19003.3	338.75	614.429	trafE.KO	1
B04	26	27509.9	41	18772.5	357.452	625.506	trafE.KO	1
B04	27	27930.1	41.8889	18906.6	350.339	649.895	trafE.KO	1
B04	28	27671.4	41	19433.2	315.142	687.539	trafE.KO	1
B04	29	27712.5	39.2222	19828.6	330.509	667.443	trafE.KO	1
B04	30	27329.1	40.4444	18589.5	289.151	738.744	trafE.KO	1
B04	31	27319	40.5556	19220.3	295.928	770.875	trafE.KO	1
B04	32	25741.4	41.2222	17773.8	302.642	815.805	trafE.KO	1
B04	33	24043.7	42	16365	285.456	844.736	trafE.KO	1
B05	34	23221.6	37.2222	16435	236.489	903.44	trafE.KO	1
B05	35	20236.6	32.6667	14175.4	225.877	952.617	trafE.KO	1
B05	36	18086.8	30.4444	12839.3	214.295	1015.31	trafE.KO	1
B05	37	14857.8	24.2222	10760.2	156.083	1121.83	trafE.KO	1
B05	38	12728.5	22.1111	9178.65	143.144	1143.19	trafE.KO	1
B05	39	10805.4	21.7778	7566.31	146.316	1188.14	trafE.KO	1
B05	40	10007.3	20	7114.34	112.038	1261.17	trafE.KO	1
B05	1	9503.72	21.1111	4541.4	250.489	14.4856	trafE.KO	2
B05	2	9901.43	19.8889	5490.68	230.899	28.8349	trafE.KO	2
B05	3	10062.9	22.2222	5288.25	237.137	26.7599	trafE.KO	2
B05	4	10505.2	21.8889	5627.69	240.636	57.6998	trafE.KO	2
B05	5	11135.1	23.2222	6145.04	256.881	85.7965	trafE.KO	2
B05	6	11790.3	25.1111	6298.74	254.819	88.5034	trafE.KO	2
B05	7	12158.7	24.8889	6845.97	269.424	96.9999	trafE.KO	2
B05	8	12680.3	25.7778	7397.57	264.503	129.948	trafE.KO	2
B05	9	13139.3	27.1111	7685.65	267.063	148.172	trafE.KO	2
B05	10	13869.7	26.1111	8228.09	258.836	189.59	trafE.KO	2
B05	11	14613.3	27.7778	8549.37	265.789	214.212	trafE.KO	2
B05	12	15762.9	28.1111	9831.69	278.12	245.242	trafE.KO	2
B05	13	15965.5	26.7778	10038.8	247.054	299.031	trafE.KO	2
B05	14	17635.9	27.5556	11731.1	264.955	328.258	trafE.KO	2
B05	15	18737.5	31.1111	11958.2	287.052	338.773	trafE.KO	2
B05	16	19402.1	31.8889	12450.7	287.149	369.919	trafE.KO	2
B05	17	20335.1	31.7778	13308.9	285.895	413.712	trafE.KO	2
B05	18	21822	31.8889	14813.2	291.711	418.101	trafE.KO	2
B05	19	22835.8	35.8889	14736	307.434	443.677	trafE.KO	2
B05	20	23813.1	37.5556	15506.2	324.893	469.503	trafE.KO	2
B05	21	23854.9	37.2222	15683.5	317.932	518.397	trafE.KO	2
B05	22	24506.1	37.4444	15971.9	338.83	553.72	trafE.KO	2
B05	23	25472.3	38.5556	17181.4	334.214	609.461	trafE.KO	2
B05	24	26107.3	42.7778	16823.7	358.16	637.368	trafE.KO	2
B05	25	26542.5	46.1111	16641.6	360.551	660.097	trafE.KO	2
B05	26	26156	46.8889	16492.3	355.749	714.734	trafE.KO	2
B05	27	27267.8	48.8889	17038.3	353.388	726.27	trafE.KO	2
B05	28	28063.5	50.4444	17687.7	340.788	778.417	trafE.KO	2
B05	29	26635.4	43.7778	17780.5	324.291	799.69	trafE.KO	2
B05	30	26830.3	47.6667	17183.3	354.037	849.924	trafE.KO	2
B05	31	27292.8	48.6667	17834.8	342.162	877.764	trafE.KO	2
B05	32	28561.7	54.2222	17473.9	372.15	881.778	trafE.KO	2
B05	33	26318.8	51	16776.2	340.984	937.393	trafE.KO	2
B06	34	24626.7	52.2222	15196.5	309.792	1010.69	trafE.KO	2
B06	35	20203.6	42.4444	13330.9	252.564	1104.54	trafE.KO	2
B06	36	16658.4	38.3333	10854.1	239.645	1179.75	trafE.KO	2
B06	37	15258.6	37.1111	9933.1	213.523	1252.69	trafE.KO	2
B06	38	14621.6	37.1111	9279.31	202.712	1337.35	trafE.KO	2
B06	39	14555.8	34	9752.9	188.556	1400.76	trafE.KO	2
B06	40	13922.4	37	8633.39	205.592	1524.55	trafE.KO	2
B06	1	8048.34	19.2222	3395.06	231.328	7.95114	trafE.KO	3
B06	2	8417.76	19.6667	4302.03	227.623	20.9902	trafE.KO	3
B06	3	8839.98	20.8889	4212.99	250.359	34.5381	trafE.KO	3
B06	4	9505.82	21.7778	4675.91	266.428	48.0859	trafE.KO	3
B06	5	9636.86	22.5556	4980.72	251.028	70.5327	trafE.KO	3
B06	6	10320.5	22.1111	5654	251.72	99.2845	trafE.KO	3
B06	7	11125.1	23.5556	6393.75	251.151	116.374	trafE.KO	3
B06	8	11935.7	25.6667	6450.43	282.357	136.147	trafE.KO	3
B06	9	12381.2	26	6999.02	275.706	166.159	trafE.KO	3
B06	10	12950.7	26.1111	7523.29	282.929	185.161	trafE.KO	3
B06	11	13762.7	26.7778	8089.29	292.243	221.378	trafE.KO	3
B06	12	14613.7	28.3333	8768.01	275.307	259.348	trafE.KO	3
B06	13	15007.3	27.4444	9092.59	277.282	290.138	trafE.KO	3
B06	14	16000.9	28.3333	9957.94	272.553	315.837	trafE.KO	3
B06	15	17033.8	31.6667	10346.3	298.904	345.477	trafE.KO	3
B06	16	18529.7	31.4444	11642.9	298.452	367.109	trafE.KO	3
B06	17	19061.8	33.1111	11870.7	302.22	396.809	trafE.KO	3
B06	18	20003.4	35.2222	12168.4	316.143	435.63	trafE.KO	3
B06	19	20798.5	35.1111	12730.7	304.454	469.177	trafE.KO	3
B06	20	22144.1	38.4444	13262.9	332.441	450.135	trafE.KO	3
B06	21	22494.2	35.8889	14570.7	311.045	484.763	trafE.KO	3
B06	22	22659.2	37.1111	14383.6	319.924	503.479	trafE.KO	3
B06	23	24507.7	38.2222	15936.7	336.512	521.333	trafE.KO	3
B06	24	25228.4	41.5556	16486.2	352.331	541.875	trafE.KO	3
B06	25	25528.6	41	16455.6	336.552	595.654	trafE.KO	3
B06	26	25256.7	41.2222	16707.8	330.247	641.043	trafE.KO	3
B06	27	26036.1	43	17207.9	322.305	676.362	trafE.KO	3
B06	28	25828.2	45.1111	16661.1	339.425	718.123	trafE.KO	3
B06	29	27228.7	48.3333	16938.5	345.125	772.441	trafE.KO	3
B06	30	28081.8	50.7778	17472.2	329.335	814.475	trafE.KO	3
B06	31	27210.3	47.7778	17707.1	317.204	856.295	trafE.KO	3
B06	32	26205.3	45.4444	17332.4	301.212	900.051	trafE.KO	3
B06	33	26924.8	50	16949.2	332.388	912.575	trafE.KO	3
B07	34	25912.1	49.3333	16371.5	308.731	958.17	trafE.KO	3
B07	35	25133.6	49.5556	15767.4	313.643	992.333	trafE.KO	3
B07	36	24437.9	50.1111	15105.7	321.797	994.058	trafE.KO	3
B07	37	21410.2	44.5556	13589.2	278.785	1111.23	trafE.KO	3
B07	38	20346	42.2222	13395.8	263.359	1170.4	trafE.KO	3
B07	39	16675.4	37.1111	10899.3	234.088	1284.52	trafE.KO	3
B07	40	14338.4	34.4444	9373.13	209.656	1374.95	trafE.KO	3
