# Supplementary material for: A TRAF-like E3 ubiquitin ligase TrafE coordinates ESCRT and autophagy in endolysosomal damage response and cell-autonomous immunity to Mycobacterium marinum
Source: eLife. 2023 Apr 18;12:e85727. doi: 10.7554/eLife.85727 (PMC10181826; doi:10.7554/eLife.85727)
Supplement: Figure 2—source data 4. [file elife-85727-fig2-data4.xlsx]

## Sheet: Sheet1
well	time	bactNotInDicty	strain	bio rep
C02	1	6.50956	wt	1
C02	2	6.08307	wt	1
C02	3	9.18446	wt	1
C02	4	23.0453	wt	1
C02	5	28.4758	wt	1
C02	6	35.1366	wt	1
C02	7	44.541	wt	1
C02	8	55.3287	wt	1
C02	9	76.1227	wt	1
C02	10	85.3708	wt	1
C02	11	93.4583	wt	1
C02	12	106.065	wt	1
C02	13	109.144	wt	1
C02	14	127.581	wt	1
C02	15	119.872	wt	1
C02	16	127.787	wt	1
C02	17	118.921	wt	1
C02	18	121.093	wt	1
C02	19	117.963	wt	1
C02	20	121.113	wt	1
C02	21	106.604	wt	1
C02	22	118.279	wt	1
C02	23	115.858	wt	1
C02	24	122.074	wt	1
C02	25	115.543	wt	1
C02	26	136.549	wt	1
C02	27	137.737	wt	1
C02	28	144.524	wt	1
C02	29	145.465	wt	1
C02	30	144.57	wt	1
C02	31	125.393	wt	1
C02	32	136.034	wt	1
C02	33	123.956	wt	1
C02	34	116.085	wt	1
C02	35	112.749	wt	1
C02	36	119.453	wt	1
C02	37	117.129	wt	1
C02	38	138.867	wt	1
C02	39	125.925	wt	1
C02	40	133.094	wt	1
C03	1	6.29706	wt	2
C03	2	7.30268	wt	2
C03	3	10.0818	wt	2
C03	4	14.1863	wt	2
C03	5	21.6353	wt	2
C03	6	22.194	wt	2
C03	7	25.5826	wt	2
C03	8	25.9983	wt	2
C03	9	38.0797	wt	2
C03	10	44.9334	wt	2
C03	11	54.8665	wt	2
C03	12	63.3185	wt	2
C03	13	59.8081	wt	2
C03	14	76.0995	wt	2
C03	15	74.4068	wt	2
C03	16	74.204	wt	2
C03	17	75.2216	wt	2
C03	18	80.5389	wt	2
C03	19	85.3176	wt	2
C03	20	81.5233	wt	2
C03	21	81.0245	wt	2
C03	22	84.4696	wt	2
C03	23	78.986	wt	2
C03	24	84.596	wt	2
C03	25	89.2549	wt	2
C03	26	97.3125	wt	2
C03	27	99.9196	wt	2
C03	28	91.6526	wt	2
C03	29	95.0944	wt	2
C03	30	97.941	wt	2
C03	31	100.96	wt	2
C03	32	95.3471	wt	2
C03	33	106.271	wt	2
C03	34	109.859	wt	2
C03	35	92.7333	wt	2
C03	36	85.4107	wt	2
C03	37	101.656	wt	2
C03	38	100.921	wt	2
C03	39	100.385	wt	2
C03	40	106.976	wt	2
C04	1	16.022	wt	3
C04	2	12.7747	wt	3
C04	3	10.6285	wt	3
C04	4	22.6637	wt	3
C04	5	27.486	wt	3
C04	6	27.1456	wt	3
C04	7	41.588	wt	3
C04	8	47.1282	wt	3
C04	9	48.352	wt	3
C04	10	61.0419	wt	3
C04	11	63.1635	wt	3
C04	12	66.5022	wt	3
C04	13	70.4728	wt	3
C04	14	78.7598	wt	3
C04	15	84.9352	wt	3
C04	16	88.5067	wt	3
C04	17	85.5371	wt	3
C04	18	89.5675	wt	3
C04	19	97.2759	wt	3
C04	20	103.667	wt	3
C04	21	100.339	wt	3
C04	22	108.945	wt	3
C04	23	101.37	wt	3
C04	24	97.2061	wt	3
C04	25	110.787	wt	3
C04	26	111.063	wt	3
C04	27	105.949	wt	3
C04	28	99.627	wt	3
C04	29	102.025	wt	3
C04	30	100.066	wt	3
C04	31	100.984	wt	3
C04	32	110.568	wt	3
C04	33	116.081	wt	3
C04	34	113.976	wt	3
C04	35	107.066	wt	3
C04	36	109.823	wt	3
C04	37	130.434	wt	3
C04	38	129.549	wt	3
C04	39	131.046	wt	3
C04	40	121.878	wt	3
C05	1	7.0889	trafE.KO	1
C05	2	14.8036	trafE.KO	1
C05	3	16.8899	trafE.KO	1
C05	4	18.8752	trafE.KO	1
C05	5	22.1042	trafE.KO	1
C05	6	32.5927	trafE.KO	1
C05	7	41.3652	trafE.KO	1
C05	8	53.2869	trafE.KO	1
C05	9	67.3669	trafE.KO	1
C05	10	82.3912	trafE.KO	1
C05	11	87.0901	trafE.KO	1
C05	12	113.684	trafE.KO	1
C05	13	120.664	trafE.KO	1
C05	14	127.168	trafE.KO	1
C05	15	150.074	trafE.KO	1
C05	16	159.542	trafE.KO	1
C05	17	176.016	trafE.KO	1
C05	18	189.471	trafE.KO	1
C05	19	225.302	trafE.KO	1
C05	20	227.397	trafE.KO	1
C05	21	231.694	trafE.KO	1
C05	22	235.555	trafE.KO	1
C05	23	255.501	trafE.KO	1
C05	24	266.757	trafE.KO	1
C05	25	296.3	trafE.KO	1
C05	26	306.786	trafE.KO	1
C05	27	324.776	trafE.KO	1
C05	28	338.404	trafE.KO	1
C05	29	329.867	trafE.KO	1
C05	30	311.139	trafE.KO	1
C05	31	352.883	trafE.KO	1
C05	32	332.658	trafE.KO	1
C05	33	364.682	trafE.KO	1
C05	34	391.388	trafE.KO	1
C05	35	428.906	trafE.KO	1
C05	36	437.399	trafE.KO	1
C05	37	488.854	trafE.KO	1
C05	38	502.315	trafE.KO	1
C05	39	495.368	trafE.KO	1
C05	40	531.286	trafE.KO	1
C06	1	6.42276	trafE.KO	2
C06	2	12.0352	trafE.KO	2
C06	3	15.7539	trafE.KO	2
C06	4	25.0406	trafE.KO	2
C06	5	37.5276	trafE.KO	2
C06	6	39.6293	trafE.KO	2
C06	7	45.3092	trafE.KO	2
C06	8	60.696	trafE.KO	2
C06	9	68.5607	trafE.KO	2
C06	10	85.3376	trafE.KO	2
C06	11	96.0189	trafE.KO	2
C06	12	105.373	trafE.KO	2
C06	13	121.232	trafE.KO	2
C06	14	142.791	trafE.KO	2
C06	15	176.717	trafE.KO	2
C06	16	179.468	trafE.KO	2
C06	17	201.851	trafE.KO	2
C06	18	227.178	trafE.KO	2
C06	19	251.853	trafE.KO	2
C06	20	259.428	trafE.KO	2
C06	21	266.122	trafE.KO	2
C06	22	266.072	trafE.KO	2
C06	23	315.339	trafE.KO	2
C06	24	342.561	trafE.KO	2
C06	25	353.309	trafE.KO	2
C06	26	365.124	trafE.KO	2
C06	27	419.428	trafE.KO	2
C06	28	451.063	trafE.KO	2
C06	29	464.185	trafE.KO	2
C06	30	465.443	trafE.KO	2
C06	31	498.484	trafE.KO	2
C06	32	527.552	trafE.KO	2
C06	33	583.093	trafE.KO	2
C06	34	636.081	trafE.KO	2
C06	35	678.344	trafE.KO	2
C06	36	747.45	trafE.KO	2
C06	37	789.956	trafE.KO	2
C06	38	833.719	trafE.KO	2
C06	39	898.971	trafE.KO	2
C06	40	985.798	trafE.KO	2
C07	1	10.3754	trafE.KO	3
C07	2	7.81745	trafE.KO	3
C07	3	10.5906	trafE.KO	3
C07	4	18.5759	trafE.KO	3
C07	5	23.9399	trafE.KO	3
C07	6	27.8739	trafE.KO	3
C07	7	37.6008	trafE.KO	3
C07	8	39.3633	trafE.KO	3
C07	9	62.8542	trafE.KO	3
C07	10	75.5807	trafE.KO	3
C07	11	89.1884	trafE.KO	3
C07	12	101.958	trafE.KO	3
C07	13	99.1681	trafE.KO	3
C07	14	122.612	trafE.KO	3
C07	15	140.706	trafE.KO	3
C07	16	156.259	trafE.KO	3
C07	17	174.323	trafE.KO	3
C07	18	181.789	trafE.KO	3
C07	19	201.708	trafE.KO	3
C07	20	223.736	trafE.KO	3
C07	21	238.591	trafE.KO	3
C07	22	250.875	trafE.KO	3
C07	23	292.506	trafE.KO	3
C07	24	298.269	trafE.KO	3
C07	25	294.322	trafE.KO	3
C07	26	353.884	trafE.KO	3
C07	27	352.949	trafE.KO	3
C07	28	405.023	trafE.KO	3
C07	29	404.966	trafE.KO	3
C07	30	407.58	trafE.KO	3
C07	31	405.774	trafE.KO	3
C07	32	437.948	trafE.KO	3
C07	33	479.446	trafE.KO	3
C07	34	526.454	trafE.KO	3
C07	35	567.56	trafE.KO	3
C07	36	608.477	trafE.KO	3
C07	37	624.937	trafE.KO	3
C07	38	677.958	trafE.KO	3
C07	39	695.932	trafE.KO	3
C07	40	755.302	trafE.KO	3
