# Supplementary material for: A TRAF-like E3 ubiquitin ligase TrafE coordinates ESCRT and autophagy in endolysosomal damage response and cell-autonomous immunity to Mycobacterium marinum
Source: eLife. 2023 Apr 18;12:e85727. doi: 10.7554/eLife.85727 (PMC10181826; doi:10.7554/eLife.85727)
Supplement: Figure 2—source data 5. [file elife-85727-fig2-data5.xlsx]

## Sheet: Sheet1
Time (hours)	Ax2(ka) infected WT	ΔTrafE infected WT	ΔTrafE complemented infected WT	ΔAtg1 infected WT
0	100	100	100	100
1	100	98.3051	98.1818	100
2	100	96.6102	98.1818	100
3	100	95.7627	98.1818	100
4	100	93.2203	97.2727	100
5	100	88.1356	96.3636	100
6	100	83.8983	96.3636	100
7	100	80.5085	96.3636	100
8	100	77.1186	94.5455	100
9	99.5413	75.4237	94.5455	100
10	99.5413	72.8814	93.6364	99.1304
11	99.5413	72.0339	92.7273	99.1304
12	99.0826	70.339	90.9091	99.1304
13	99.0826	68.6441	88.1818	99.1304
14	99.0826	66.9492	88.1818	99.1304
15	99.0826	64.4068	88.1818	99.1304
16	98.6239	62.7119	87.2727	99.1304
17	97.7064	61.8644	87.2727	99.1304
18	97.7064	61.0169	86.3636	99.1304
19	97.7064	60.1695	85.4545	98.2609
20	96.789	60.1695	85.4545	98.2609
