# Supplementary material for: A TRAF-like E3 ubiquitin ligase TrafE coordinates ESCRT and autophagy in endolysosomal damage response and cell-autonomous immunity to Mycobacterium marinum
Source: eLife. 2023 Apr 18;12:e85727. doi: 10.7554/eLife.85727 (PMC10181826; doi:10.7554/eLife.85727)
Supplement: Figure 3—source data 1. [file elife-85727-fig3-data1.xlsx]

## Sheet: Sheet1
hpi	Mm strain	trafE_Mm colocalization	total_Infected	percent colocalization
1.5	wt	6	8	75
1.5	wt	8	12	66.6667
1.5	wt	3	5	60
1.5	wt	7	10	70
1.5	RD1	1	16	6.25
1.5	RD1	0	9	0
1.5	RD1	0	4	0
1.5	RD1	1	16	6.25
24	wt	7	12	58.3333
24	wt	5	10	50
24	wt	4	11	36.3636
24	wt	9	13	69.2308
24	RD1	0	8	0
24	RD1	1	15	6.66667
24	RD1	1	12	8.33333
24	RD1	0	8	0
