# Supplementary material for: A TRAF-like E3 ubiquitin ligase TrafE coordinates ESCRT and autophagy in endolysosomal damage response and cell-autonomous immunity to Mycobacterium marinum
Source: eLife. 2023 Apr 18;12:e85727. doi: 10.7554/eLife.85727 (PMC10181826; doi:10.7554/eLife.85727)
Supplement: Figure 3—source data 2. [file elife-85727-fig3-data2.xlsx]

## Sheet: raw data
time	wt Mm			wt RD1			TrafE KO RD1
0	267	275	241	219	268	254	300	303	331
1	371	367	360	298	270	289	251	300	274
2	321	303	286	248	234	259	277	291	277
3	290	313	293	270	224	219	314	294	271
4	295	297	297	249	276	257	305	331	329
5	314	302	262	297	276	263	339	320	328
6	315	267	286	261	280	274	316	404	318
7	288	285	261	274	262	274	323	322	402
8	298	249	258	308	272	275	393	395	382
9	286	261	260	274	314	282	322	348	383
10	254	262	271	251	266	277	330	318	372
11	258	272	277	253	249	281	365	378	393
12	261	259	270	227	292	288	331	318	363
13	298	244	276	277	273	296	329	328	334
14	282	261	265	257	240	237	325	362	341
15	302	275	280	238	251	289	270	311	316
16	299	309	284	258	255	251	325	325	304
17	307	294	325	238	244	242	322	288	328
18	328	280	290	237	215	232	310	284	327
19	346	323	317	235	209	215	306	274	282
20	380	313	320	243	210	232	327	271	264
21	343	336	340	230	192	197	291	269	280
22	377	361	342	192	204	257	303	281	276
23	349	339	356	207	222	195	255	279	265
24	378	393	412	199	159	193	250	280	265
25	415	376	366	213	187	200	275	260	304
26	400	408	435	204	205	205	316	261	266
27	404	414	407	210	186	217	281	279	280
28	431	382	388	209	208	209	262	285	230
29	418	361	435	194	182	189	275	249	272
30	481	432	424	209	207	197	260	272	260
31	468	456	396	249	206	205	264	259	264
32	473	419	466	209	214	183	262	250	279
33	478	453	465	204	208	229	238	223	293
34	468	461	449	225	200	211	278	258	267
35	472	436	477	196	209	218	284	258	249
36	501	490	462	207	194	182	244	244	286
37	519	474	490	195	189	210	232	215	308
38	490	526	497	223	195	221	226	221	282
39	589	516	477	202	198	237	262	237	302
40	535	522	509	233	174	238	254	281	274
41	591	510	553	197	201	214	240	231	316
42	546	579	561	215	197	207	252	260	328
43	577	568	522	193	209	253	254	218	326
44	582	563	517	235	227	244	259	281	317
45	566	600	561	237	231	254	299	260	367
46	634	660	575	279	246	275	288	265	348
47	648	647	622	261	228	290	240	296	394
48	700	642	622	255	256	274	255	248	353
49	708	666	662	252	244	271	282	293	386
50	688	703	672	267	252	311	269	297	385
51	722	687	695	318	274	312	282	286	456
52	765	719	710	339	290	350	293	343	477
53	819	720	777	318	292	322	320	321	477
54	778	699	772	333	270	337	281	295	476
55	800	795	725	310	335	358	306	339	522
56	809	805	743	318	310	372	301	354	508
57	862	778	740	320	317	366	256	341	543
58	862	821	745	334	309	351	281	362	554
59	834	836	804	332	383	355	339	357	567
60	880	889	833	362	322	368	330	360	595
61	902	872	838	443	380	412	325	380	546
62	975	923	865	392	403	405	300	373	645
63	907	851	862	345	418	421	264	331	616
64	945	966	882	394	356	427	312	380	579
65	994	911	883	420	415	436	334	356	605
66	944	955	961	422	404	419	314	391	644
67	983	982	924	417	405	452	317	405	677
68	997	1002	947	407	411	372	295	386	640
69	1035	1039	962	390	369	417	302	391	678
70	1077	1100	955	431	384	478	354	414	626
71	1155	967	989	479	420	428	342	396	681
72	1082	1063	977	414	412	448

## Sheet: baseline corrected
Time	wt Mm		wt RD1		TrafE KO RD1
	Mean	SEM	Mean	SEM	Mean	SEM		base line corrected: value / mean of the first time point
0	0.855551	0.0583339	0.966354	0.0651928	1.04991	0.0455895
1	1.19974	0.0676526	1.11763	0.0487867	0.927383	0.0550932
2	0.994318	0.0645343	0.966354	0.0424387	0.949865	0.0322769
3	0.979021	0.0594454	0.929838	0.0704151	0.988085	0.0511319
4	0.971372	0.0541508	1.01982	0.0457717	1.08476	0.0427696
5	0.959353	0.0742346	1.09025	0.0526744	1.10949	0.0377945
6	0.948427	0.069884	1.06286	0.0411219	1.16682	0.103761
7	0.911276	0.0579732	1.05634	0.0379449	1.17693	0.0959501
8	0.879589	0.0695499	1.11502	0.058027	1.3152	0.0413307
9	0.881774	0.0564766	1.13459	0.0605332	1.18368	0.0691751
10	0.859921	0.0505308	1.03547	0.0449137	1.14658	0.0648455
11	0.881774	0.0525339	1.02113	0.0516492	1.27698	0.0466855
12	0.863199	0.0493436	1.05243	0.0892002	1.13759	0.0563221
13	0.893794	0.0715507	1.10329	0.0455402	1.11398	0.0336368
14	0.882867	0.0535134	0.957225	0.0396831	1.15558	0.0498061
15	0.936407	0.0588183	1.01461	0.0684529	1.00832	0.0575293
16	0.97465	0.0592826	0.996348	0.0335555	1.07239	0.0396166
17	1.0118	0.0635945	0.944184	0.0316585	1.05441	0.0523693
18	0.981206	0.0726923	0.892019	0.0391237	1.0353	0.052166
19	1.07736	0.0666375	0.859416	0.0416717	0.968975	0.0433327
20	1.10686	0.0930546	0.893323	0.047907	0.968975	0.0731185
21	1.11342	0.062374	0.807251	0.0536009	0.944245	0.0352626
22	1.18007	0.073622	0.851591	0.0829489	0.966727	0.0400593
23	1.14073	0.0655656	0.813772	0.040532	0.898156	0.0355099
24	1.29261	0.0788919	0.718571	0.0541031	0.89366	0.0394444
25	1.2642	0.0857881	0.782473	0.0389604	0.943121	0.0517645
26	1.35817	0.0832338	0.80073	0.0262354	0.947617	0.0655505
27	1.33851	0.0751864	0.799426	0.0450893	0.944245	0.0280812
28	1.31228	0.0888905	0.81638	0.0267469	0.873426	0.059698
29	1.32649	0.104116	0.736828	0.0276904	0.894784	0.0383629
30	1.46088	0.100163	0.799426	0.0299207	0.890288	0.029658
31	1.44231	0.108553	0.86072	0.0633468	0.884667	0.0268411
32	1.48383	0.0995984	0.790297	0.0456303	0.889164	0.0387401
33	1.52535	0.0881976	0.835942	0.0408461	0.847572	0.076036
34	1.50568	0.0858174	0.829421	0.0392138	0.902653	0.0331285
35	1.51333	0.0943271	0.812467	0.0364834	0.889164	0.0441374
36	1.58763	0.0962737	0.760303	0.0376385	0.870054	0.0538078
37	1.62041	0.100052	0.774648	0.0352073	0.848696	0.0996509
38	1.65319	0.0989169	0.833333	0.0445935	0.819469	0.0702789
39	1.72858	0.144388	0.830725	0.0555671	0.900405	0.0692004
40	1.7111	0.0984348	0.841158	0.0849833	0.909397	0.0383689
41	1.80726	0.126555	0.798122	0.0329424	0.884667	0.094626
42	1.84222	0.107273	0.807251	0.0333587	0.944245	0.0859996
43	1.82146	0.115806	0.854199	0.0755425	0.897032	0.110325
44	1.816	0.119301	0.920709	0.0357327	0.963354	0.0637717
45	1.88702	0.112521	0.941575	0.040934	1.04092	0.109862
46	2.04218	0.140478	1.0433	0.0531074	1.01281	0.0886796
47	2.09462	0.119958	1.01591	0.0775578	1.04541	0.154903
48	2.14598	0.142011	1.02374	0.0412993	0.96223	0.117811
49	2.22465	0.132969	1.00026	0.0453071	1.08026	0.115765
50	2.25415	0.128942	1.08242	0.0777972	1.06902	0.122047
51	2.29895	0.132675	1.17893	0.0662811	1.15108	0.196377
52	2.39729	0.144735	1.27673	0.0833755	1.25112	0.188924
53	2.53059	0.169447	1.21544	0.0541825	1.25674	0.179832
54	2.45739	0.160201	1.22587	0.0938895	1.18255	0.214656
55	2.53497	0.161974	1.30803	0.069085	1.31183	0.229866
56	2.57539	0.159635	1.30412	0.0873162	1.30733	0.21292
57	2.60052	0.186926	1.30803	0.0753719	1.28147	0.289536
58	2.65297	0.185635	1.2963	0.0638492	1.34555	0.275893
59	2.70323	0.154348	1.39541	0.0735762	1.41974	0.250369
60	2.84309	0.16828	1.37194	0.0721535	1.44447	0.28577
61	2.85402	0.170132	1.61059	0.0885486	1.40625	0.227859
62	3.01901	0.197798	1.56495	0.0535964	1.48156	0.35671
63	2.86276	0.169058	1.54408	0.109563	1.36129	0.366153
64	3.05179	0.189052	1.53495	0.0946767	1.42873	0.273457
65	3.04633	0.201812	1.65754	0.0596326	1.45571	0.296215
66	3.125	0.17483	1.62363	0.0574234	1.51641	0.339137
67	3.15669	0.187092	1.66145	0.0774506	1.57262	0.368367
68	3.21897	0.188313	1.5519	0.0701979	1.48494	0.350905
69	3.31731	0.202171	1.53365	0.0739789	1.54114	0.385302
70	3.4222	0.241015	1.68623	0.119648	1.567	0.28209
71	3.39926	0.271455	1.73057	0.0918335	1.5951	0.357781
72	3.41128	0.217524	1.66145	0.0710246
