# Supplementary material for: A TRAF-like E3 ubiquitin ligase TrafE coordinates ESCRT and autophagy in endolysosomal damage response and cell-autonomous immunity to Mycobacterium marinum
Source: eLife. 2023 Apr 18;12:e85727. doi: 10.7554/eLife.85727 (PMC10181826; doi:10.7554/eLife.85727)
Supplement: Figure 3—source data 3. [file elife-85727-fig3-data3.xlsx]

## Sheet: Sheet1
Time (hours)	ΔTrafE infected ΔRD1	ΔTrafE complemented infected ΔRD1	ΔAtg1 infected ΔRD1	Ax2(ka) infected ΔRD1
0	100	100	100	100
1	100	100	100	100
2	100	100	100	100
3	100	100	100	100
4	100	100	100	100
5	100	100	100	100
6	100	100	100	100
7	100	100	100	100
8	100	100	100	100
9	100	100	100	100
10	99.0291	100	100	100
11	99.0291	100	100	100
12	99.0291	100	100	100
13	97.0874	100	100	100
14	97.0874	99.0654	100	99.422
15	94.1748	99.0654	100	98.8439
16	94.1748	99.0654	100	98.2659
17	93.2039	99.0654	100	98.2659
18	93.2039	99.0654	100	97.6879
19	92.233	98.1308	100	97.6879
20	92.233	98.1308	100	97.1098
