# Supplementary material for: A TRAF-like E3 ubiquitin ligase TrafE coordinates ESCRT and autophagy in endolysosomal damage response and cell-autonomous immunity to Mycobacterium marinum
Source: eLife. 2023 Apr 18;12:e85727. doi: 10.7554/eLife.85727 (PMC10181826; doi:10.7554/eLife.85727)
Supplement: Figure 4—source data 1. [file elife-85727-fig4-data1.xlsx]

## Sheet: Sheet1
Strain	Total	Infected	FK2	percentage
wt	8	4	3	75
wt	13	7	4	57,14285714
wt	16	5	2	40
wt	12	3	2	66,66666667
wt	15	7	4	57,14285714
trafE.KO	19	8	5	62,5
trafE.KO	18	9	4	44,44444444
trafE.KO	13	6	3	50
trafE.KO	15	4	2	50
trafE.KO	13	5	4	80
