# Supplementary material for: A TRAF-like E3 ubiquitin ligase TrafE coordinates ESCRT and autophagy in endolysosomal damage response and cell-autonomous immunity to Mycobacterium marinum
Source: eLife. 2023 Apr 18;12:e85727. doi: 10.7554/eLife.85727 (PMC10181826; doi:10.7554/eLife.85727)
Supplement: Figure 4—source data 2. [file elife-85727-fig4-data2.xlsx]

## Sheet: Sheet1
Strain	Total	Infected	K63	percent
wt	21	11	5	45,45454545
wt	23	10	4	40
wt	18	6	5	83,33333333
wt	24	11	9	81,81818182
wt	19	8	4	50
trafE.KO	23	10	3	30
trafE.KO	15	5	1	20
trafE.KO	29	9	2	22,22222222
trafE.KO	24	7	1	14,28571429
trafE.KO	21	14	1	7,142857143
