# Supplementary material for: A TRAF-like E3 ubiquitin ligase TrafE coordinates ESCRT and autophagy in endolysosomal damage response and cell-autonomous immunity to Mycobacterium marinum
Source: eLife. 2023 Apr 18;12:e85727. doi: 10.7554/eLife.85727 (PMC10181826; doi:10.7554/eLife.85727)
Supplement: Figure 5—source data 1. [file elife-85727-fig5-data1.xlsx]

## Sheet: Sheet1
hpi	strain	bio_rep	nb_infected	GFP_pos_MCV	TrafE_positive_MCV
1.5	trafE	1	4	1	25
1.5	trafE	1	7	3	42.8571
1.5	trafE	2	6	3	50
1.5	trafE	2	5	2	40
1.5	trafE	3	5	2	40
1.5	trafE	3	5	2	40
1.5	trafE ∆RING	1	5	0	0
1.5	trafE ∆RING	1	3	0	0
1.5	trafE ∆RING	2	7	0	0
1.5	trafE ∆RING	2	3	0	0
1.5	trafE ∆RING	3	7	0	0
1.5	trafE ∆RING	3	8	0	0
1.5	trafE ∆TRAF	1	7	2	28.5714
1.5	trafE ∆TRAF	1	5	1	20
1.5	trafE ∆TRAF	2	3	1	33.3333
1.5	trafE ∆TRAF	2	5	1	20
1.5	trafE ∆TRAF	3	3	1	33.3333
1.5	trafE ∆TRAF	3	6	1	16.6667
6	trafE	1	3	1	33.3333
6	trafE	1	5	2	40
6	trafE	2	7	3	42.8571
6	trafE	2	6	1	16.6667
6	trafE	3	6	2	33.3333
6	trafE	3	3	2	66.6667
6	trafE ∆RING	1	3	0	0
6	trafE ∆RING	1	4	0	0
6	trafE ∆RING	2	7	0	0
6	trafE ∆RING	2	4	0	0
6	trafE ∆RING	3	5	0	0
6	trafE ∆RING	3	8	0	0
6	trafE ∆TRAF	1	6	1	16.6667
6	trafE ∆TRAF	1	8	0	0
6	trafE ∆TRAF	2	3	0	0
6	trafE ∆TRAF	2	6	2	33.3333
6	trafE ∆TRAF	3	8	2	25
6	trafE ∆TRAF	3	5	2	40
24	trafE	1	6	3	50
24	trafE	1	4	2	50
24	trafE	2	2	1	50
24	trafE	2	5	2	40
24	trafE	3	4	2	50
24	trafE	3	4	2	50
24	trafE ∆RING	1	4	0	0
24	trafE ∆RING	1	6	0	0
24	trafE ∆RING	2	7	0	0
24	trafE ∆RING	2	7	0	0
24	trafE ∆RING	3	9	0	0
24	trafE ∆RING	3	3	0	0
24	trafE ∆TRAF	1	8	3	37.5
24	trafE ∆TRAF	1	6	0	0
24	trafE ∆TRAF	2	5	0	0
24	trafE ∆TRAF	2	5	1	20
24	trafE ∆TRAF	3	5	3	60
24	trafE ∆TRAF	3	10	2	20
