# Supplementary material for: A TRAF-like E3 ubiquitin ligase TrafE coordinates ESCRT and autophagy in endolysosomal damage response and cell-autonomous immunity to Mycobacterium marinum
Source: eLife. 2023 Apr 18;12:e85727. doi: 10.7554/eLife.85727 (PMC10181826; doi:10.7554/eLife.85727)
Supplement: Figure 5—source data 2. [file elife-85727-fig5-data2.xlsx]

## Sheet: raw_data
time	wt			∆RING			∆TRAF			trafE KO
0	291	316	322	145	136	129	154	164	154	176	176	163
1	381	387	397	191	158	144	194	189	194	172	172	200
2	382	399	421	151	152	184	166	171	179	197	261	205
3	398	398	414	173	176	172	175	176	162	261	277	265
4	424	420	405	162	176	187	198	177	201	278	294	274
5	393	459	444	180	183	183	173	197	205	297	327	308
6	459	430	436	173	195	203	195	210	208	312	321	307
7	424	455	435	205	189	197	221	210	208	314	339	309
8	428	473	492	204	224	203	227	213	223	318	368	348
9	464	494	481	228	201	219	240	265	239	378	375	414
10	491	470	548	216	229	236	235	229	256	388	426	414
11	482	474	503	242	267	244	258	240	281	409	452	445
12	487	548	525	283	268	262	281	294	287	447	475	473
13	516	527	521	306	310	288	300	324	328	524	523	494
14	500	510	606	340	330	305	320	345	344	543	538	562
15	542	546	560	330	345	357	378	353	353	600	591	597
16	565	544	555	343	375	360	391	401	395	571	609	576
17	626	568	613	426	423	399	421	441	434	655	662	632
18	581	613	625	446	421	439	431	414	443	652	681	672
19	583	638	587	429	488	443	458	471	464	683	737	707
20	608	657	637	455	466	471	466	518	491	748	754	721
21	633	696	700	471	465	476	501	517	513	777	770	758
22	685	669	679	500	483	497	485	512	516	794	829	791
23	663	712	713	478	490	479	496	562	557	803	829	784
24	746	738	738	531	502	512	545	535	510	878	865	863
25	726	732	759	521	527	518	580	606	544	890	873	861
26	777	768	788	529	548	547	540	590	583	898	870	899
27	712	798	820	572	566	557	568	629	578	895	915	902
28	810	776	837	607	583	565	600	638	589	888	883	919
29	845	803	877	576	588	555	622	594	586	933	903	909
30	795	822	870	593	618	591	637	615	666	920	983	940
31	830	869	882	615	604	608	644	660	600	931	981	952
32	904	848	934	624	629	643	680	715	635	976	977	1011
33	909	878	922	666	670	644	659	670	694	970	1022	1016
34	925	928	989	667	647	670	729	691	696	1056	953	1002
35	968	988	1017	686	645	664	763	705	769	1051	1047	1014
36	1021	1010	1038	700	694	704	720	763	717	1068	1106	1041
37	1028	1063	1085	746	655	749	736	773	778	1089	1080	1044
38	1068	1104	1137	754	741	712	726	765	766	1044	1085	1069
39	1107	1108	1233	759	752	748	776	779	783	1118	1118	1132
40	1150	1132	1199	761	722	777	775	842	818	1167	1149	1143
41	1130	1097	1223	785	749	795	824	835	789	1166	1171	1179
42	1161	1189	1219	843	840	798	813	860	832	1121	1261	1163
43	1190	1224	1293	815	832	844	831	843	920	1187	1225	1213
44	1213	1257	1310	895	870	824	923	877	867	1189	1218	1203
45	1229	1269	1289	830	852	871	857	933	925	1212	1250	1188
46	1246	1292	1342	858	853	945	941	968	928	1270	1232	1309
47	1300	1363	1344	902	926	910	913	947	950	1274	1312	1313
48	1273	1408	1374	894	924	945	984	991	933	1232	1328	1293
49	1327	1371	1398	945	946	943	971	1002	1027	1325	1347	1303
50	1366	1433	1399	971	959	942	976	1017	1026	1341	1353	1388
51	1407	1367	1443	958	982	973	1007	1031	1034	1383	1351	1352
52	1322	1411	1445	1021	968	980	1015	1050	994	1382	1437	1347
53	1366	1468	1502	985	972	992	1031	1030	1068	1410	1379	1374
54	1404	1412	1489	1037	1019	1023	1072	1095	1109	1397	1408	1385
55	1453	1474	1514	1036	1074	1059	1059	1105	1082	1364	1454	1467
56	1455	1441	1529	1099	1046	1099	1115	1128	1150	1413	1444	1426
57	1442	1489	1550	1094	1079	1120	1105	1116	1106	1448	1479	1485
58	1473	1514	1615	1125	1096	1146	1128	1171	1171	1460	1469	1448
59	1533	1510	1558	1140	1125	1141	1150	1190	1191	1469	1591	1463
60	1479	1508	1626	1112	1137	1124	1239	1220	1191	1521	1552	1462
61	1485	1594	1543	1168	1154	1186	1217	1183	1257	1553	1521	1522
62	1587	1532	1699	1181	1165	1156	1208	1263	1194	1568	1660	1545
63	1607	1652	1642	1237	1245	1188	1245	1253	1248	1506	1630	1592
64	1580	1646	1621	1221	1263	1208	1288	1265	1239	1608	1615	1558
65	1638	1688	1653	1228	1190	1220	1276	1314	1333	1629	1699	1639
66	1624	1690	1716	1264	1225	1247	1289	1344	1299	1582	1643	1631
67	1624	1697	1767	1230	1235	1306	1346	1340	1345	1571	1677	1636
68	1663	1740	1731	1259	1259	1254	1324	1401	1359	1617	1734	1671
69	1745	1672	1738	1347	1309	1239	1355	1367	1415	1725	1717	1657
70	1710	1714	1805	1375	1311	1271	1333	1424	1356	1696	1680	1703
71	1747	1756	1798	1291	1349	1317	1333	1398	1430	1667	1744	1727
72	1729	1781	1775	1338	1346	1323	1449	1394	1454	1750	1749	1743

## Sheet: baseline_corrected
time	wt		∆RING		∆TRAF		trafE KO
	Mean	SEM	Mean	SEM	Mean	SEM	Mean	SEM		base line corrected: value / mean of the first time point
0	1	0.0433521	1	0.0479192	1	0.0299622	1	0.0356986
1	1.25404	0.0412902	1.20244	0.109785	1.22246	0.0279822	1.05631	0.0605554
2	1.29386	0.0538717	1.1878	0.0889258	1.09322	0.0333989	1.28738	0.121698
3	1.30248	0.043483	1.27073	0.0439464	1.08686	0.0367649	1.55922	0.048305
4	1.34446	0.0452475	1.28049	0.0684429	1.22034	0.0545082	1.64272	0.0546474
5	1.39505	0.077393	1.33171	0.045713	1.21822	0.0663378	1.80971	0.0684995
6	1.42626	0.0522124	1.39268	0.0808321	1.29873	0.0406244	1.82524	0.0518859
7	1.41442	0.0523312	1.44146	0.0593951	1.35381	0.0385035	1.86796	0.0717314
8	1.49946	0.0766038	1.53902	0.0722766	1.40466	0.039823	2.00777	0.0986526
9	1.54898	0.0551489	1.58049	0.0789996	1.57627	0.0635404	2.26602	0.0927332
10	1.62433	0.0902324	1.66098	0.0707509	1.52542	0.0612465	2.38447	0.0888311
11	1.57051	0.0556557	1.83659	0.0855398	1.65042	0.0831251	2.53592	0.100593
12	1.67922	0.0771269	1.98293	0.0812556	1.82627	0.0454659	2.70874	0.0862275
13	1.68353	0.0526195	2.20488	0.0896243	2.01695	0.0701015	2.99223	0.0948109
14	1.7395	0.12145	2.37805	0.110873	2.13771	0.0689123	3.19029	0.0910983
15	1.77395	0.0571636	2.51707	0.102665	2.29661	0.071923	3.47184	0.0889837
16	1.79117	0.0582955	2.62927	0.111856	2.51483	0.0563909	3.40971	0.110591
17	1.9451	0.0823122	3.0439	0.120607	2.74576	0.069073	3.78447	0.109144
18	1.95802	0.0734912	3.18537	0.120905	2.72881	0.078751	3.8932	0.110228
19	1.94618	0.0826311	3.31707	0.172026	2.95127	0.0669304	4.1301	0.138379
20	2.04736	0.0777748	3.39512	0.120125	3.125	0.11615	4.3165	0.123966
21	2.18407	0.0969118	3.4439	0.11899	3.24364	0.0752081	4.47573	0.117511
22	2.18837	0.0687555	3.60976	0.128179	3.20551	0.0918751	4.68738	0.138017
23	2.24758	0.0871031	3.52927	0.122849	3.42161	0.153097	4.69126	0.140698
24	2.39182	0.0738241	3.76829	0.142043	3.36864	0.0973142	5.06019	0.130637
25	2.38644	0.080161	3.81951	0.13086	3.66525	0.138142	5.09515	0.137636
26	2.5113	0.0792156	3.96098	0.141611	3.62924	0.125629	5.17864	0.141964
27	2.50807	0.131278	4.13415	0.143667	3.76059	0.144087	5.26602	0.137241
28	2.60818	0.0981847	4.28049	0.170178	3.87076	0.125005	5.2233	0.147263
29	2.71798	0.108304	4.19268	0.158624	3.8178	0.106557	5.3301	0.144752
30	2.67707	0.1084	4.39512	0.161919	4.06356	0.12737	5.52039	0.176467
31	2.77826	0.0989895	4.4561	0.152812	4.0339	0.142489	5.56117	0.163817
32	2.89128	0.120327	4.62439	0.162123	4.30085	0.173091	5.75534	0.15999
33	2.91604	0.0988272	4.82927	0.173995	4.28602	0.112068	5.84078	0.175762
34	3.0592	0.115449	4.83902	0.172263	4.48305	0.1215	5.8466	0.227606
35	3.20022	0.108323	4.86585	0.186271	4.73941	0.16403	6.04272	0.167125
36	3.30355	0.104628	5.11707	0.174686	4.66102	0.13664	6.24272	0.192078
37	3.41873	0.117709	5.2439	0.287248	4.84534	0.132762	6.23883	0.176678
38	3.56189	0.126736	5.38293	0.203762	4.78178	0.131416	6.20971	0.171465
39	3.71152	0.176622	5.50976	0.188168	4.95339	0.105733	6.53981	0.167306
40	3.74704	0.131807	5.5122	0.221739	5.1589	0.165721	6.7165	0.174669
41	3.71367	0.166731	5.68049	0.217931	5.18644	0.140869	6.82718	0.173742
42	3.84177	0.129591	6.05122	0.23095	5.3072	0.142023	6.8835	0.297611
43	3.99031	0.156642	6.07561	0.214873	5.49576	0.212048	7.03883	0.189309
44	4.06889	0.154135	6.31463	0.262541	5.65042	0.162304	7.00971	0.183544
45	4.07643	0.13733	6.22683	0.228101	5.75212	0.195796	7.08738	0.207513
46	4.17653	0.156221	6.47805	0.309749	6.01059	0.147725	7.4	0.227288
47	4.31324	0.145301	6.67805	0.232093	5.95339	0.146956	7.57087	0.205218
48	4.36491	0.187195	6.73902	0.252719	6.16102	0.174744	7.48155	0.249728
49	4.40904	0.150771	6.9122	0.234302	6.35593	0.169502	7.71845	0.208411
50	4.51884	0.151954	7.00488	0.245206	6.39619	0.16712	7.92621	0.21628
51	4.53929	0.156163	7.10488	0.24613	6.50847	0.148199	7.93398	0.209414
52	4.49731	0.181741	7.24146	0.272011	6.48093	0.172136	8.08932	0.254908
53	4.66738	0.194637	7.19268	0.247459	6.62924	0.161374	8.0835	0.214332
54	4.63402	0.166844	7.50976	0.257574	6.94068	0.162243	8.13592	0.208985
55	4.78041	0.15752	7.72927	0.274096	6.87712	0.168382	8.32039	0.282314
56	4.76319	0.170565	7.9122	0.297634	7.18856	0.16556	8.3165	0.216361
57	4.82347	0.179042	8.03171	0.285908	7.04873	0.150996	8.56699	0.226332
58	4.95371	0.204023	8.2122	0.29779	7.35169	0.180443	8.49903	0.217445
59	4.95264	0.158281	8.30732	0.28402	7.48093	0.18024	8.78252	0.328881
60	4.96555	0.21034	8.22683	0.283718	7.73305	0.186308	8.80583	0.270285
61	4.97524	0.183302	8.5561	0.29773	7.74788	0.213121	8.92427	0.233435
62	5.18622	0.224616	8.54146	0.294321	7.76483	0.212079	9.26796	0.310833
63	5.27557	0.167613	8.95122	0.330134	7.93644	0.168798	9.18058	0.315209
64	5.21744	0.17158	9.00488	0.328399	8.0339	0.192521	9.2835	0.256605
65	5.35953	0.171117	8.87317	0.312343	8.31144	0.205792	9.64466	0.274744
66	5.41442	0.188061	9.1122	0.319616	8.33051	0.20666	9.42913	0.261657
67	5.47686	0.214384	9.19756	0.359687	8.54025	0.181322	9.4835	0.299371
68	5.52637	0.186708	9.2	0.311971	8.65254	0.23156	9.75146	0.315242
69	5.54898	0.18594	9.5	0.396462	8.76483	0.219218	9.90097	0.279443
70	5.62863	0.199516	9.65122	0.395041	8.71398	0.253445	9.86214	0.252085
71	5.70614	0.182133	9.65122	0.349293	8.81568	0.260349	9.9767	0.286237
72	5.68891	0.182279	9.77317	0.334808	9.10381	0.228312	10.1786	0.257252
