# Supplementary material for: A TRAF-like E3 ubiquitin ligase TrafE coordinates ESCRT and autophagy in endolysosomal damage response and cell-autonomous immunity to Mycobacterium marinum
Source: eLife. 2023 Apr 18;12:e85727. doi: 10.7554/eLife.85727 (PMC10181826; doi:10.7554/eLife.85727)
Supplement: Figure 6—source data 1. [file elife-85727-fig6-data1.xlsx]

## Sheet: Sheet1
time	strain	dot_nb	cell_nb_t0	norma_dot_nb	N										time	strain	dot_nb	cell_nb_t0	norma_dot_nb
0	2019.04.03_trafE.OE_LLOEMat5min.Project Maximum Z_XY1554283129_Z0_T00_C0.tif	2	35	0.0571429	1										0	trafE.KO-GFPtrafE	1	17	0.0588235
1	2019.04.03_trafE.OE_LLOEMat5min.Project Maximum Z_XY1554283129_Z0_T00_C0.tif	4	35	0.114286	1										1	trafE.KO-GFPtrafE	3	17	0.176471
2	2019.04.03_trafE.OE_LLOEMat5min.Project Maximum Z_XY1554283129_Z0_T00_C0.tif	3	35	0.0857143	1										2	trafE.KO-GFPtrafE	4	17	0.235294
3	2019.04.03_trafE.OE_LLOEMat5min.Project Maximum Z_XY1554283129_Z0_T00_C0.tif	3	35	0.0857143	1										3	trafE.KO-GFPtrafE	5	17	0.294118
4	2019.04.03_trafE.OE_LLOEMat5min.Project Maximum Z_XY1554283129_Z0_T00_C0.tif	2	35	0.0571429	1										4	trafE.KO-GFPtrafE	3	17	0.176471
5	2019.04.03_trafE.OE_LLOEMat5min.Project Maximum Z_XY1554283129_Z0_T00_C0.tif	3	35	0.0857143	1										5	trafE.KO-GFPtrafE	4	17	0.235294
6	2019.04.03_trafE.OE_LLOEMat5min.Project Maximum Z_XY1554283129_Z0_T00_C0.tif	9	35	0.257143	1										6	trafE.KO-GFPtrafE	4	17	0.235294
7	2019.04.03_trafE.OE_LLOEMat5min.Project Maximum Z_XY1554283129_Z0_T00_C0.tif	16	35	0.457143	1										7	trafE.KO-GFPtrafE	6	17	0.352941
8	2019.04.03_trafE.OE_LLOEMat5min.Project Maximum Z_XY1554283129_Z0_T00_C0.tif	29	35	0.828571	1										8	trafE.KO-GFPtrafE	6	17	0.352941
9	2019.04.03_trafE.OE_LLOEMat5min.Project Maximum Z_XY1554283129_Z0_T00_C0.tif	48	35	1.37143	1										9	trafE.KO-GFPtrafE	8	17	0.470588
10	2019.04.03_trafE.OE_LLOEMat5min.Project Maximum Z_XY1554283129_Z0_T00_C0.tif	47	35	1.34286	1										10	trafE.KO-GFPtrafE	14	17	0.823529
11	2019.04.03_trafE.OE_LLOEMat5min.Project Maximum Z_XY1554283129_Z0_T00_C0.tif	48	35	1.37143	1										11	trafE.KO-GFPtrafE	19	17	1.11765
12	2019.04.03_trafE.OE_LLOEMat5min.Project Maximum Z_XY1554283129_Z0_T00_C0.tif	52	35	1.48571	1										12	trafE.KO-GFPtrafE	18	17	1.05882
13	2019.04.03_trafE.OE_LLOEMat5min.Project Maximum Z_XY1554283129_Z0_T00_C0.tif	64	35	1.82857	1										13	trafE.KO-GFPtrafE	22	17	1.29412
14	2019.04.03_trafE.OE_LLOEMat5min.Project Maximum Z_XY1554283129_Z0_T00_C0.tif	69	35	1.97143	1										14	trafE.KO-GFPtrafE	42	17	2.47059
15	2019.04.03_trafE.OE_LLOEMat5min.Project Maximum Z_XY1554283129_Z0_T00_C0.tif	71	35	2.02857	1										15	trafE.KO-GFPtrafE	77	17	4.52941
16	2019.04.03_trafE.OE_LLOEMat5min.Project Maximum Z_XY1554283129_Z0_T00_C0.tif	82	35	2.34286	1										16	trafE.KO-GFPtrafE	116	17	6.82353
17	2019.04.03_trafE.OE_LLOEMat5min.Project Maximum Z_XY1554283129_Z0_T00_C0.tif	87	35	2.48571	1										17	trafE.KO-GFPtrafE	124	17	7.29412
18	2019.04.03_trafE.OE_LLOEMat5min.Project Maximum Z_XY1554283129_Z0_T00_C0.tif	88	35	2.51429	1										18	trafE.KO-GFPtrafE	135	17	7.94118
19	2019.04.03_trafE.OE_LLOEMat5min.Project Maximum Z_XY1554283129_Z0_T00_C0.tif	92	35	2.62857	1										19	trafE.KO-GFPtrafE	121	17	7.11765
20	2019.04.03_trafE.OE_LLOEMat5min.Project Maximum Z_XY1554283129_Z0_T00_C0.tif	90	35	2.57143	1										20	trafE.KO-GFPtrafE	98	17	5.76471
21	2019.04.03_trafE.OE_LLOEMat5min.Project Maximum Z_XY1554283129_Z0_T00_C0.tif	104	35	2.97143	1										21	trafE.KO-GFPtrafE	112	17	6.58824
22	2019.04.03_trafE.OE_LLOEMat5min.Project Maximum Z_XY1554283129_Z0_T00_C0.tif	110	35	3.14286	1										22	trafE.KO-GFPtrafE	101	17	5.94118
23	2019.04.03_trafE.OE_LLOEMat5min.Project Maximum Z_XY1554283129_Z0_T00_C0.tif	98	35	2.8	1										23	trafE.KO-GFPtrafE	81	17	4.76471
24	2019.04.03_trafE.OE_LLOEMat5min.Project Maximum Z_XY1554283129_Z0_T00_C0.tif	107	35	3.05714	1										24	trafE.KO-GFPtrafE	82	17	4.82353
25	2019.04.03_trafE.OE_LLOEMat5min.Project Maximum Z_XY1554283129_Z0_T00_C0.tif	122	35	3.48571	1										25	trafE.KO-GFPtrafE	90	17	5.29412
26	2019.04.03_trafE.OE_LLOEMat5min.Project Maximum Z_XY1554283129_Z0_T00_C0.tif	117	35	3.34286	1										26	trafE.KO-GFPtrafE	81	17	4.76471
0	2019.03.12_trafE.KO.trafDdl_LLOEMat5min.Project Maximum Z_XY1552413875_Z0_T00_C0.tif	2	18	0.111111	1										0	trafE.KO-GFPtrafE_∆TRAF	1	11	0.0909091
1	2019.03.12_trafE.KO.trafDdl_LLOEMat5min.Project Maximum Z_XY1552413875_Z0_T00_C0.tif	4	18	0.222222	1										1	trafE.KO-GFPtrafE_∆TRAF	2	11	0.181818
2	2019.03.12_trafE.KO.trafDdl_LLOEMat5min.Project Maximum Z_XY1552413875_Z0_T00_C0.tif	5	18	0.277778	1										2	trafE.KO-GFPtrafE_∆TRAF	1	11	0.0909091
3	2019.03.12_trafE.KO.trafDdl_LLOEMat5min.Project Maximum Z_XY1552413875_Z0_T00_C0.tif	10	18	0.555556	1										3	trafE.KO-GFPtrafE_∆TRAF	4	11	0.363636
4	2019.03.12_trafE.KO.trafDdl_LLOEMat5min.Project Maximum Z_XY1552413875_Z0_T00_C0.tif	6	18	0.333333	1										4	trafE.KO-GFPtrafE_∆TRAF	4	11	0.363636
5	2019.03.12_trafE.KO.trafDdl_LLOEMat5min.Project Maximum Z_XY1552413875_Z0_T00_C0.tif	5	18	0.277778	1										5	trafE.KO-GFPtrafE_∆TRAF	2	11	0.181818
6	2019.03.12_trafE.KO.trafDdl_LLOEMat5min.Project Maximum Z_XY1552413875_Z0_T00_C0.tif	5	18	0.277778	1										6	trafE.KO-GFPtrafE_∆TRAF	5	11	0.454545
7	2019.03.12_trafE.KO.trafDdl_LLOEMat5min.Project Maximum Z_XY1552413875_Z0_T00_C0.tif	3	18	0.166667	1										7	trafE.KO-GFPtrafE_∆TRAF	5	11	0.454545
8	2019.03.12_trafE.KO.trafDdl_LLOEMat5min.Project Maximum Z_XY1552413875_Z0_T00_C0.tif	0	18	0	1										8	trafE.KO-GFPtrafE_∆TRAF	5	11	0.454545
9	2019.03.12_trafE.KO.trafDdl_LLOEMat5min.Project Maximum Z_XY1552413875_Z0_T00_C0.tif	3	18	0.166667	1										9	trafE.KO-GFPtrafE_∆TRAF	4	11	0.363636
10	2019.03.12_trafE.KO.trafDdl_LLOEMat5min.Project Maximum Z_XY1552413875_Z0_T00_C0.tif	3	18	0.166667	1										10	trafE.KO-GFPtrafE_∆TRAF	8	11	0.727273
11	2019.03.12_trafE.KO.trafDdl_LLOEMat5min.Project Maximum Z_XY1552413875_Z0_T00_C0.tif	0	18	0	1										11	trafE.KO-GFPtrafE_∆TRAF	16	11	1.45455
12	2019.03.12_trafE.KO.trafDdl_LLOEMat5min.Project Maximum Z_XY1552413875_Z0_T00_C0.tif	2	18	0.111111	1										12	trafE.KO-GFPtrafE_∆TRAF	13	11	1.18182
13	2019.03.12_trafE.KO.trafDdl_LLOEMat5min.Project Maximum Z_XY1552413875_Z0_T00_C0.tif	1	18	0.0555556	1										13	trafE.KO-GFPtrafE_∆TRAF	20	11	1.81818
14	2019.03.12_trafE.KO.trafDdl_LLOEMat5min.Project Maximum Z_XY1552413875_Z0_T00_C0.tif	1	18	0.0555556	1										14	trafE.KO-GFPtrafE_∆TRAF	20	11	1.81818
15	2019.03.12_trafE.KO.trafDdl_LLOEMat5min.Project Maximum Z_XY1552413875_Z0_T00_C0.tif	1	18	0.0555556	1										15	trafE.KO-GFPtrafE_∆TRAF	27	11	2.45455
16	2019.03.12_trafE.KO.trafDdl_LLOEMat5min.Project Maximum Z_XY1552413875_Z0_T00_C0.tif	2	18	0.111111	1										16	trafE.KO-GFPtrafE_∆TRAF	27	11	2.45455
17	2019.03.12_trafE.KO.trafDdl_LLOEMat5min.Project Maximum Z_XY1552413875_Z0_T00_C0.tif	4	18	0.222222	1										17	trafE.KO-GFPtrafE_∆TRAF	27	11	2.45455
18	2019.03.12_trafE.KO.trafDdl_LLOEMat5min.Project Maximum Z_XY1552413875_Z0_T00_C0.tif	7	18	0.388889	1										18	trafE.KO-GFPtrafE_∆TRAF	36	11	3.27273
19	2019.03.12_trafE.KO.trafDdl_LLOEMat5min.Project Maximum Z_XY1552413875_Z0_T00_C0.tif	9	18	0.5	1										19	trafE.KO-GFPtrafE_∆TRAF	32	11	2.90909
20	2019.03.12_trafE.KO.trafDdl_LLOEMat5min.Project Maximum Z_XY1552413875_Z0_T00_C0.tif	6	18	0.333333	1										20	trafE.KO-GFPtrafE_∆TRAF	37	11	3.36364
21	2019.03.12_trafE.KO.trafDdl_LLOEMat5min.Project Maximum Z_XY1552413875_Z0_T00_C0.tif	6	18	0.333333	1										21	trafE.KO-GFPtrafE_∆TRAF	30	11	2.72727
22	2019.03.12_trafE.KO.trafDdl_LLOEMat5min.Project Maximum Z_XY1552413875_Z0_T00_C0.tif	11	18	0.611111	1										22	trafE.KO-GFPtrafE_∆TRAF	38	11	3.45455
23	2019.03.12_trafE.KO.trafDdl_LLOEMat5min.Project Maximum Z_XY1552413875_Z0_T00_C0.tif	12	18	0.666667	1										23	trafE.KO-GFPtrafE_∆TRAF	30	11	2.72727
24	2019.03.12_trafE.KO.trafDdl_LLOEMat5min.Project Maximum Z_XY1552413875_Z0_T00_C0.tif	12	18	0.666667	1										24	trafE.KO-GFPtrafE_∆TRAF	42	11	3.81818
25	2019.03.12_trafE.KO.trafDdl_LLOEMat5min.Project Maximum Z_XY1552413875_Z0_T00_C0.tif	13	18	0.722222	1										25	trafE.KO-GFPtrafE_∆TRAF	35	11	3.18182
26	2019.03.12_trafE.KO.trafDdl_LLOEMat5min.Project Maximum Z_XY1552413875_Z0_T00_C0.tif	15	18	0.833333	1										26	trafE.KO-GFPtrafE_∆TRAF	36	11	3.27273
0	2019.04.03_E.KO_trafE.R.Del_LLOEMat5min.Project Maximum Z_XY1554285134_Z0_T00_C0.tif	1	22	0.0454545	1										0	trafE.KO-GFPtrafE_∆RING	0	16	0
1	2019.04.03_E.KO_trafE.R.Del_LLOEMat5min.Project Maximum Z_XY1554285134_Z0_T00_C0.tif	0	22	0	1										1	trafE.KO-GFPtrafE_∆RING	0	16	0
2	2019.04.03_E.KO_trafE.R.Del_LLOEMat5min.Project Maximum Z_XY1554285134_Z0_T00_C0.tif	0	22	0	1										2	trafE.KO-GFPtrafE_∆RING	0	16	0
3	2019.04.03_E.KO_trafE.R.Del_LLOEMat5min.Project Maximum Z_XY1554285134_Z0_T00_C0.tif	2	22	0.0909091	1										3	trafE.KO-GFPtrafE_∆RING	0	16	0
4	2019.04.03_E.KO_trafE.R.Del_LLOEMat5min.Project Maximum Z_XY1554285134_Z0_T00_C0.tif	3	22	0.136364	1										4	trafE.KO-GFPtrafE_∆RING	0	16	0
5	2019.04.03_E.KO_trafE.R.Del_LLOEMat5min.Project Maximum Z_XY1554285134_Z0_T00_C0.tif	1	22	0.0454545	1										5	trafE.KO-GFPtrafE_∆RING	0	16	0
6	2019.04.03_E.KO_trafE.R.Del_LLOEMat5min.Project Maximum Z_XY1554285134_Z0_T00_C0.tif	1	22	0.0454545	1										6	trafE.KO-GFPtrafE_∆RING	0	16	0
7	2019.04.03_E.KO_trafE.R.Del_LLOEMat5min.Project Maximum Z_XY1554285134_Z0_T00_C0.tif	1	22	0.0454545	1										7	trafE.KO-GFPtrafE_∆RING	0	16	0
8	2019.04.03_E.KO_trafE.R.Del_LLOEMat5min.Project Maximum Z_XY1554285134_Z0_T00_C0.tif	3	22	0.136364	1										8	trafE.KO-GFPtrafE_∆RING	0	16	0
9	2019.04.03_E.KO_trafE.R.Del_LLOEMat5min.Project Maximum Z_XY1554285134_Z0_T00_C0.tif	0	22	0	1										9	trafE.KO-GFPtrafE_∆RING	0	16	0
10	2019.04.03_E.KO_trafE.R.Del_LLOEMat5min.Project Maximum Z_XY1554285134_Z0_T00_C0.tif	0	22	0	1										10	trafE.KO-GFPtrafE_∆RING	0	16	0
11	2019.04.03_E.KO_trafE.R.Del_LLOEMat5min.Project Maximum Z_XY1554285134_Z0_T00_C0.tif	1	22	0.0454545	1										11	trafE.KO-GFPtrafE_∆RING	0	16	0
12	2019.04.03_E.KO_trafE.R.Del_LLOEMat5min.Project Maximum Z_XY1554285134_Z0_T00_C0.tif	0	22	0	1										12	trafE.KO-GFPtrafE_∆RING	0	16	0
13	2019.04.03_E.KO_trafE.R.Del_LLOEMat5min.Project Maximum Z_XY1554285134_Z0_T00_C0.tif	0	22	0	1										13	trafE.KO-GFPtrafE_∆RING	0	16	0
14	2019.04.03_E.KO_trafE.R.Del_LLOEMat5min.Project Maximum Z_XY1554285134_Z0_T00_C0.tif	0	22	0	1										14	trafE.KO-GFPtrafE_∆RING	0	16	0
15	2019.04.03_E.KO_trafE.R.Del_LLOEMat5min.Project Maximum Z_XY1554285134_Z0_T00_C0.tif	1	22	0.0454545	1										15	trafE.KO-GFPtrafE_∆RING	0	16	0
16	2019.04.03_E.KO_trafE.R.Del_LLOEMat5min.Project Maximum Z_XY1554285134_Z0_T00_C0.tif	0	22	0	1										16	trafE.KO-GFPtrafE_∆RING	0	16	0
17	2019.04.03_E.KO_trafE.R.Del_LLOEMat5min.Project Maximum Z_XY1554285134_Z0_T00_C0.tif	0	22	0	1										17	trafE.KO-GFPtrafE_∆RING	0	16	0
18	2019.04.03_E.KO_trafE.R.Del_LLOEMat5min.Project Maximum Z_XY1554285134_Z0_T00_C0.tif	2	22	0.0909091	1										18	trafE.KO-GFPtrafE_∆RING	0	16	0
19	2019.04.03_E.KO_trafE.R.Del_LLOEMat5min.Project Maximum Z_XY1554285134_Z0_T00_C0.tif	2	22	0.0909091	1										19	trafE.KO-GFPtrafE_∆RING	0	16	0
20	2019.04.03_E.KO_trafE.R.Del_LLOEMat5min.Project Maximum Z_XY1554285134_Z0_T00_C0.tif	1	22	0.0454545	1										20	trafE.KO-GFPtrafE_∆RING	0	16	0
21	2019.04.03_E.KO_trafE.R.Del_LLOEMat5min.Project Maximum Z_XY1554285134_Z0_T00_C0.tif	2	22	0.0909091	1										21	trafE.KO-GFPtrafE_∆RING	0	16	0
22	2019.04.03_E.KO_trafE.R.Del_LLOEMat5min.Project Maximum Z_XY1554285134_Z0_T00_C0.tif	5	22	0.227273	1										22	trafE.KO-GFPtrafE_∆RING	0	16	0
23	2019.04.03_E.KO_trafE.R.Del_LLOEMat5min.Project Maximum Z_XY1554285134_Z0_T00_C0.tif	2	22	0.0909091	1										23	trafE.KO-GFPtrafE_∆RING	1	16	0.0625
24	2019.04.03_E.KO_trafE.R.Del_LLOEMat5min.Project Maximum Z_XY1554285134_Z0_T00_C0.tif	3	22	0.136364	1										24	trafE.KO-GFPtrafE_∆RING	0	16	0
25	2019.04.03_E.KO_trafE.R.Del_LLOEMat5min.Project Maximum Z_XY1554285134_Z0_T00_C0.tif	3	22	0.136364	1										25	trafE.KO-GFPtrafE_∆RING	0	16	0
26	2019.04.03_E.KO_trafE.R.Del_LLOEMat5min.Project Maximum Z_XY1554285134_Z0_T00_C0.tif	3	22	0.136364	1										26	trafE.KO-GFPtrafE_∆RING	0	16	0
0	trafE.KO-GFPtrafE	6	11	0.545455	2
1	trafE.KO-GFPtrafE	10	11	0.909091	2
2	trafE.KO-GFPtrafE	5	11	0.454545	2
3	trafE.KO-GFPtrafE	3	11	0.272727	2
4	trafE.KO-GFPtrafE	6	11	0.545455	2
5	trafE.KO-GFPtrafE	2	11	0.181818	2
6	trafE.KO-GFPtrafE	1	11	0.0909091	2
7	trafE.KO-GFPtrafE	5	11	0.454545	2
8	trafE.KO-GFPtrafE	6	11	0.545455	2
9	trafE.KO-GFPtrafE	7	11	0.636364	2
10	trafE.KO-GFPtrafE	12	11	1.09091	2
11	trafE.KO-GFPtrafE	6	11	0.545455	2
12	trafE.KO-GFPtrafE	9	11	0.818182	2
13	trafE.KO-GFPtrafE	6	11	0.545455	2
14	trafE.KO-GFPtrafE	12	11	1.09091	2
15	trafE.KO-GFPtrafE	21	11	1.90909	2
16	trafE.KO-GFPtrafE	22	11	2	2
17	trafE.KO-GFPtrafE	26	11	2.36364	2
18	trafE.KO-GFPtrafE	28	11	2.54545	2
19	trafE.KO-GFPtrafE	39	11	3.54545	2
20	trafE.KO-GFPtrafE	36	11	3.27273	2
21	trafE.KO-GFPtrafE	36	11	3.27273	2
22	trafE.KO-GFPtrafE	41	11	3.72727	2
23	trafE.KO-GFPtrafE	42	11	3.81818	2
24	trafE.KO-GFPtrafE	46	11	4.18182	2
25	trafE.KO-GFPtrafE	40	11	3.63636	2
26	trafE.KO-GFPtrafE	46	11	4.18182	2
0	trafE.KO-GFPtrafE_∆TRAF	2	15	0.133333	2
1	trafE.KO-GFPtrafE_∆TRAF	4	15	0.266667	2
2	trafE.KO-GFPtrafE_∆TRAF	3	15	0.2	2
3	trafE.KO-GFPtrafE_∆TRAF	7	15	0.466667	2
4	trafE.KO-GFPtrafE_∆TRAF	3	15	0.2	2
5	trafE.KO-GFPtrafE_∆TRAF	4	15	0.266667	2
6	trafE.KO-GFPtrafE_∆TRAF	1	15	0.0666667	2
7	trafE.KO-GFPtrafE_∆TRAF	2	15	0.133333	2
8	trafE.KO-GFPtrafE_∆TRAF	0	15	0	2
9	trafE.KO-GFPtrafE_∆TRAF	1	15	0.0666667	2
10	trafE.KO-GFPtrafE_∆TRAF	2	15	0.133333	2
11	trafE.KO-GFPtrafE_∆TRAF	0	15	0	2
12	trafE.KO-GFPtrafE_∆TRAF	2	15	0.133333	2
13	trafE.KO-GFPtrafE_∆TRAF	0	15	0	2
14	trafE.KO-GFPtrafE_∆TRAF	1	15	0.0666667	2
15	trafE.KO-GFPtrafE_∆TRAF	1	15	0.0666667	2
16	trafE.KO-GFPtrafE_∆TRAF	1	15	0.0666667	2
17	trafE.KO-GFPtrafE_∆TRAF	4	15	0.266667	2
18	trafE.KO-GFPtrafE_∆TRAF	6	15	0.4	2
19	trafE.KO-GFPtrafE_∆TRAF	6	15	0.4	2
20	trafE.KO-GFPtrafE_∆TRAF	6	15	0.4	2
21	trafE.KO-GFPtrafE_∆TRAF	6	15	0.4	2
22	trafE.KO-GFPtrafE_∆TRAF	7	15	0.466667	2
23	trafE.KO-GFPtrafE_∆TRAF	9	15	0.6	2
24	trafE.KO-GFPtrafE_∆TRAF	9	15	0.6	2
25	trafE.KO-GFPtrafE_∆TRAF	11	15	0.733333	2
26	trafE.KO-GFPtrafE_∆TRAF	11	15	0.733333	2
0	trafE.KO-GFPtrafE_∆RING	0	8	0	2
1	trafE.KO-GFPtrafE_∆RING	0	8	0	2
2	trafE.KO-GFPtrafE_∆RING	1	8	0.125	2
3	trafE.KO-GFPtrafE_∆RING	0	8	0	2
4	trafE.KO-GFPtrafE_∆RING	2	8	0.25	2
5	trafE.KO-GFPtrafE_∆RING	1	8	0.125	2
6	trafE.KO-GFPtrafE_∆RING	1	8	0.125	2
7	trafE.KO-GFPtrafE_∆RING	1	8	0.125	2
8	trafE.KO-GFPtrafE_∆RING	1	8	0.125	2
9	trafE.KO-GFPtrafE_∆RING	1	8	0.125	2
10	trafE.KO-GFPtrafE_∆RING	1	8	0.125	2
11	trafE.KO-GFPtrafE_∆RING	1	8	0.125	2
12	trafE.KO-GFPtrafE_∆RING	1	8	0.125	2
13	trafE.KO-GFPtrafE_∆RING	2	8	0.25	2
14	trafE.KO-GFPtrafE_∆RING	1	8	0.125	2
15	trafE.KO-GFPtrafE_∆RING	2	8	0.25	2
16	trafE.KO-GFPtrafE_∆RING	1	8	0.125	2
17	trafE.KO-GFPtrafE_∆RING	2	8	0.25	2
18	trafE.KO-GFPtrafE_∆RING	1	8	0.125	2
19	trafE.KO-GFPtrafE_∆RING	1	8	0.125	2
20	trafE.KO-GFPtrafE_∆RING	1	8	0.125	2
21	trafE.KO-GFPtrafE_∆RING	1	8	0.125	2
22	trafE.KO-GFPtrafE_∆RING	2	8	0.25	2
23	trafE.KO-GFPtrafE_∆RING	1	8	0.125	2
24	trafE.KO-GFPtrafE_∆RING	1	8	0.125	2
25	trafE.KO-GFPtrafE_∆RING	2	8	0.25	2
26	trafE.KO-GFPtrafE_∆RING	1	8	0.125	2
