# Supplementary material for: A TRAF-like E3 ubiquitin ligase TrafE coordinates ESCRT and autophagy in endolysosomal damage response and cell-autonomous immunity to Mycobacterium marinum
Source: eLife. 2023 Apr 18;12:e85727. doi: 10.7554/eLife.85727 (PMC10181826; doi:10.7554/eLife.85727)
Supplement: Figure 6—source data 2. [file elife-85727-fig6-data2.xlsx]

## Sheet: Sheet1
N	time	n_TrafE_dots	n_DEXTRAN_dots	n_TrafE_DEXTRAN_coloc	n_cells	ave_TrafE_cell	ave_Dextran_cell	ave_coloc_cell	TrafE_Dextran_cloc_percent
1	55	114	201	39	26	4.38462	7.73077	1.5	34.2105
2	55	100	152	30	23	4.34783	6.6087	1.30435	30
3	55	71	175	26	23	3.08696	7.6087	1.13043	36.6197
