# Supplementary material for: A TRAF-like E3 ubiquitin ligase TrafE coordinates ESCRT and autophagy in endolysosomal damage response and cell-autonomous immunity to Mycobacterium marinum
Source: eLife. 2023 Apr 18;12:e85727. doi: 10.7554/eLife.85727 (PMC10181826; doi:10.7554/eLife.85727)
Supplement: Figure 6—source data 3. [file elife-85727-fig6-data3.xlsx]

## Sheet: raw_data
time	Dd wt			Dd trafE KO
-5	10388.3	4325.83	3732.56	9075.64	4376.43	3585.25
-4	10846.6	3951.06	3930.77	9400.03	4378.23	3770.91
-3	10691.8	2674.27	4123.16	9116.67	4418.36	3852.55
-2	10396.1	3100.19	4138.78	9380.06	5606.99	3879.44
0	10441.5	4293.73	4211.34	9215.26	5903.51	3918.16
1	3360.08	3279.42	4250.22	3249.72	3376.25	3955.17
2	3031.94	2521.93	4270.92	2957.3	3136.26	3960.42
3	4277.01	3290.43	4247.21	3407.73	4181.77	3879.17
4	6167.09	4139.17	4294.55	3578.62	4134.14	3867.78
5	7379.68	4133.36	4277.44	2941.85	4116.06	3911.43
6	10270.1	4086.27	4284.68	3503.21	4053.4	3886.16
7	10591.2	3797.7	4218.61	2834.77	4092.52	3908.45
8	9336.75	4075.37	4178.05	2943.45	4097.85	3778.64
9	11958.9	4031.46	4180.12	3480.13	4031.81	3860.47
10	10443.1	3861.26	4197.1	5016.94	4014.02	3913.61
11	11815.3	3472.99	4236.89	4162.46	3981.3	3888.13
12	11858	3520.24	4245.38	3595.66	4002.86	3934.72
13	11782.6	3031.19	4278.65	4171.62	3976.12	3918.06
14	11688.4	3893.5	4191.99	4041.02	3999.34	3889.58
15	11816.2	3886.07	4172.82	3457.6	3962.61	3883.05
16	11780.6	3878.1	3967.02	3704.35	3980.86	3733.9
17	11698.5	3844.47	3927.43	3111.59	3952.19	3733.08
18	11744	3817.24	3953.48	4256.76	3984.3	3750.53
19	11610.9	3824.47	3955.06	4492.93	3958.78	3688.46
20	11531.3	3802.87	3899.16	4010.07	3945.98	3705.23
21	10140	3810.36	3903.74	5200.75	3995.74	3700.42
22	11559.8	3791	3888.67	6221.16	3993.26	3686.47
23	11474.4	3802.87	3906.75	7618.46	4017.65	3683.72
24	11618.7	3801.98	3674.9	3088.39	3949.12	3674.47
25	11643.7	3794.87	3738.68	4560.94	4003.66	3660.36
