# Supplementary material for: A TRAF-like E3 ubiquitin ligase TrafE coordinates ESCRT and autophagy in endolysosomal damage response and cell-autonomous immunity to Mycobacterium marinum
Source: eLife. 2023 Apr 18;12:e85727. doi: 10.7554/eLife.85727 (PMC10181826; doi:10.7554/eLife.85727)
Supplement: Figure 7—source data 1. [file elife-85727-fig7-data1.xlsx]

## Sheet: Sheet1
time	dot_number
1	1
2	2
3	1
4	0
5	1
6	5
7	37
8	42
9	51
10	48
11	54
12	62
13	55
14	78
15	101
16	107
17	130
18	117
19	141
20	163
21	181
22	178
23	203
24	225
25	213
26	234
27	244
28	272
29	274
30	280
31	306
32	282
33	314
34	272
35	278
36	269
37	265
38	280
39	227
40	255
41	223
42	244
43	230
44	170
45	202
46	135
47	163
48	146
49	143
50	123
51	93
52	119
53	87
54	92
55	74
56	61
57	66
58	49
59	51
60	44
61	35
