# Supplementary material for: A TRAF-like E3 ubiquitin ligase TrafE coordinates ESCRT and autophagy in endolysosomal damage response and cell-autonomous immunity to Mycobacterium marinum
Source: eLife. 2023 Apr 18;12:e85727. doi: 10.7554/eLife.85727 (PMC10181826; doi:10.7554/eLife.85727)
Supplement: Figure 7—source data 2. [file elife-85727-fig7-data2.xlsx]

## Sheet: raw_data
time	LLOMe 5 mM			Sorbitol 200 mM
-5	80.3279	48.678	80.8031	96.4633	100.431	97.5443
-4	68.0802	35.9577	68.5518	96.8295	91.8729	97.3346
-3	66.8838	40.4647	67.4169	100.822	98.5867	100.331
-2	59.6427	34.6088	60.1677	102.843	98.2021	105.482
-1	61.7055	38.399	62.2833	102.721	129.356	106.406
0	73.5369	37.9579	74.2974	100.479	124.521	102.727
1	58.721	33.3637	59.3716	96.3374	75.6128	96.4555
2	57.0293	22.0028	57.5493	92.3697	81.1982	89.6331
3	68.0045	35.1856	68.6235	89.1902	84.4178	87.7354
4	72.8444	39.055	73.4783	90.3971	91.6105	90.8621
5	69.6565	46.7138	70.2689	94.2774	94.6834	93.3244
6	55.7925	30.4985	56.2761	95.6342	95.7787	95.6694
7	57.3808	24.5695	57.8553	96.3198	97.7025	96.8908
8	52.2484	15.6575	52.832	95.8455	100.718	96.9463
9	40.4166	6.91907	40.9315	95.1559	98.368	95.9763
10	30.4159	0.389346	30.8355	93.9674	94.0434	94.584
11	26.6978	2.74179	27.1436	92.5661	91.2474	92.8525
12	20.8635	-0.554909	21.2594	91.3834	93.5867	91.5477
13	14.2952	-6.96419	14.5619	90.1656	89.79	90.5318
14	10.2351	-6.90416	10.5407	88.9228	90.3402	88.9763
15	8.32618	-10.9406	8.66312	87.373	88.2028	87.2016
16	8.36147	-5.21396	8.75482	85.757	82.5409	85.6841
17	10.068	-5.79034	10.4341	84.9482	84.3818	84.428
18	3.75992	-16.7542	4.0834	83.6287	83.3	83.8886
19	8.07219	-10.1117	8.3844	82.5745	84.7387	82.9952
20	6.11418	-11.4628	6.41802	81.743	84.6256	81.7936
21	6.05524	-10.8133	6.3638	80.4627	76.3325	80.696
22	2.94411	-11.4457	2.98959	79.318	80.7307	79.4268
23	6.98421	-7.74252	7.27422	78.3247	79.8763	78.4684
24	8.29088	-8.29052	8.60636	77.791	76.8321	78.0998

## Sheet: baseline_corrected
time	LLOMe 5 mM		Sorbitol 200 mM
	mean	SEM	mean	sem
-5	100	21.4954	100	1.70633
-4	82.2604	19.8552	97.1466	2.12744
-3	83.2973	17.9477	101.8	1.4093
-2	73.5999	16.4487	104.106	2.50558
-1	77.3979	16.2766	114.959	8.60214
0	88.553	21.7947	111.306	7.92644
1	72.1877	16.4409	91.1585	7.14402
2	65.098	19.5143	89.3908	3.59114
3	81.8905	20.1075	88.7599	1.7937
4	88.3555	21.0874	92.6746	1.17474
5	88.9568	17.4834	95.8724	1.22739
6	67.9509	15.9639	97.5016	1.17725
7	66.6348	18.7279	98.8027	1.26024
8	57.5466	19.6365	99.6845	1.92503
9	42.0703	17.314	98.3228	1.53986
10	29.3794	15.0884	95.9775	1.1748
11	26.9689	12.233	93.9639	1.24056
12	19.8123	10.7352	93.9136	1.34362
13	10.4347	10.3195	91.8655	1.12968
14	6.61155	8.3038	91.102	1.19648
15	2.88295	9.27472	89.247	1.12194
16	5.67294	6.6225	86.2598	1.49995
17	7.012	7.72113	86.1837	1.05619
18	-4.24716	9.87665	85.185	1.04235
19	3.02412	8.75431	85.0122	1.22791
20	0.509715	8.4513	84.2832	1.40572
21	0.765353	8.1153	80.659	1.74133
22	-2.62714	6.88098	81.3329	1.08482
23	3.10564	7.10494	80.3799	1.09313
24	4.10217	8.00366	79.0396	1.0299
