# Supplementary material for: A TRAF-like E3 ubiquitin ligase TrafE coordinates ESCRT and autophagy in endolysosomal damage response and cell-autonomous immunity to Mycobacterium marinum
Source: eLife. 2023 Apr 18;12:e85727. doi: 10.7554/eLife.85727 (PMC10181826; doi:10.7554/eLife.85727)
Supplement: Figure 7—source data 3. [file elife-85727-fig7-data3.xlsx]

## Sheet: Sheet1
Strain	BioRep	Total	PI_pos	percent_PI_pos
wt	4	18	2	11.1111
wt	2	24	0	0
wt	3	20	1	5
wt	1	25	1	4
atg1.KO	1	14	1	7.14286
atg1.KO	4	18	5	27.7778
atg1.KO	3	21	2	9.52381
atg1.KO	2	18	1	5.55556
trafE.KO	1	39	14	35.8974
trafE.KO	2	33	10	30.303
trafE.KO	4	38	9	23.6842
trafE.KO	3	37	14	37.8378
atg1.KO	4	39	12	30.7692
atg1.KO	5	35	10	28.5714
atg1.KO	6	40	11	27.5
trafE.KO	4	32	23	71.875
trafE.KO	5	40	27	67.5
trafE.KO	6	43	35	81.3953
