# Supplementary material for: A TRAF-like E3 ubiquitin ligase TrafE coordinates ESCRT and autophagy in endolysosomal damage response and cell-autonomous immunity to Mycobacterium marinum
Source: eLife. 2023 Apr 18;12:e85727. doi: 10.7554/eLife.85727 (PMC10181826; doi:10.7554/eLife.85727)
Supplement: Figure 8—source data 1. [file elife-85727-fig8-data1.xlsx]

## Sheet: mapped_reads
gene ID	DAEZ133	DAEZ134	DAEZ135	DAEZ142	DAEZ143	DAEZ144
	WT	WT	WT	trafE KO	trafE KO	trafE KO
DDB0237335	0	0	0	0	0	0
DDB0237401	12	13	30	57	41	46
DDB0237402	12	12	47	28	21	18
DDB0237403	0	0	0	0	0	0
DDB0237404	0	0	0	0	0	0
DDB0237405	1	0	0	0	1	8
DDB0237406	10	10	13	4	1	11
DDB0237407	11	3	3	0	10	11
DDB0237408	0	5	0	6	0	1
DDB0237409	0	0	0	0	0	0
DDB0237410	0	0	0	0	0	0
DDB0237411	0	0	0	0	0	0
DDB0237412	0	0	0	0	0	0
DDB0237413	2	6	4	2	2	6
DDB0237414	7	1	2	1	4	1
DDB0237415	2	0	0	0	0	0
DDB0237416	0	0	0	0	0	0
DDB0237417	9	0	2	0	4	0
DDB0237418	11	0	6	0	6	8
DDB0237419	0	0	0	0	0	0
DDB0237420	0	0	0	0	0	0
DDB0237421	0	0	0	0	0	0
DDB0237422	0	0	0	0	0	0
DDB0237423	10	4	8	13	8	7
DDB0237424	0	0	0	0	0	0
DDB0237425	0	0	0	0	1	0
DDB0237426	5	0	6	0	2	3
DDB0237427	0	0	0	0	0	0
DDB0237428	0	0	0	0	0	0
DDB0237429	6	5	3	1	1	2
DDB0237430	8	4	2	4	3	5
DDB0237431	0	0	0	0	0	0
DDB0237432	0	0	0	0	0	0
DDB0237433	4	4	5	3	15	6
DDB0237434	0	0	0	0	0	0
DDB0237435	0	0	0	0	0	0
DDB0237436	0	0	0	0	0	0
DDB0237438	0	0	0	0	0	0
DDB0237439	0	0	0	0	0	0
DDB0237440	12	29	17	26	27	30
DDB0237441	16	3	8	0	1	0
DDB0237442	2	6	9	3	4	5
DDB0237443	0	0	0	0	0	0
DDB0237444	0	0	0	0	0	0
DDB0237445	0	2	3	3	0	0
DDB0237446	5	2	2	1	0	0
DDB0237447	0	0	0	0	0	0
DDB0237448	0	0	0	0	0	0
DDB0237449	0	0	0	0	0	0
DDB0237450	2	0	8	26	21	19
DDB0237451	0	0	0	0	0	0
DDB0237452	19	20	6	25	29	16
DDB0237453	0	0	0	1	0	0
DDB0237454	0	0	0	0	0	0
DDB0237455	0	0	0	0	0	0
DDB0237456	0	0	1	0	0	0
DDB0237457	0	1	5	0	0	0
DDB0237458	0	0	0	0	0	0
DDB0237459	4	1	1	2	2	14
DDB0237460	6	3	0	0	1	0
DDB0237461	1	0	0	0	3	2
DDB0237462	5	3	1	1	2	3
DDB0237463	1	5	1	5	10	0
DDB0237464	0	0	0	0	0	0
DDB0237715	1	0	0	0	0	0
DDB0237743	0	0	0	0	0	0
DDB0237776	0	2	1	2	2	0
DDB0237781	0	0	0	0	0	0
DDB0237805	0	0	2	0	0	0
DDB0237837	0	0	0	0	0	0
DDB0238026	0	0	0	0	0	0
DDB0238165	0	0	0	0	0	0
DDB0238252	3	6	0	2	2	3
DDB0238254	1	0	1	0	0	0
DDB0238295	0	2	0	0	0	0
DDB0238423	1	1	4	2	0	0
DDB0238510	0	0	0	2	0	0
DDB0238602	0	0	0	0	0	0
DDB0238613	10	11	15	4	4	6
DDB0238623	0	0	0	0	1	0
DDB0238624	1	3	0	8	4	3
DDB0238625	2	0	3	0	3	0
DDB0238642	0	0	0	0	0	0
DDB0238711	0	0	0	0	0	0
DDB0238716	0	0	0	0	0	0
DDB0238750	0	0	0	0	0	0
DDB0238766	0	2	0	0	0	0
DDB0238820	2	0	0	0	0	0
DDB0238848	0	2	0	0	0	0
DDB0238856	0	0	0	1	0	3
DDB0252665	0	7	2	1	1	0
DDB0252668	0	0	0	0	0	0
DDB0252685	50	65	47	56	49	51
DDB0252727	75	52	32	39	43	30
DDB0252782	0	0	0	0	0	0
DDB0252834	0	0	0	0	0	0
DDB0252875	5	0	0	0	3	5
DDB0252888	0	5	0	0	2	0
DDB0252892	13	1	0	2	1	0
DDB0266338	0	0	0	0	0	0
DDB0266371	0	0	0	0	17	5
DDB0266454	1	0	0	1	0	1
DDB0266472	0	0	0	0	0	0
DDB0266474	0	0	0	0	0	0
DDB0266486	14	17	16	12	6	4
DDB0266500	0	0	0	0	0	0
DDB0266552	0	7	0	0	0	0
DDB0266572	0	0	1	0	1	1
DDB0266594	0	0	0	0	0	0
DDB0266605	0	0	0	0	0	0
DDB0266711	136	105	79	110	122	104
DDB0266762	0	0	0	0	0	0
DDB0266768	52	5	13	28	37	11
DDB0266879	0	0	0	0	0	0
DDB0266886	0	0	0	0	0	0
DDB0266887	0	0	0	0	0	0
DDB0266888	0	0	0	0	0	0
DDB0266905	0	0	0	0	0	0
DDB0266906	0	0	0	0	0	0
DDB0266908	0	0	0	0	0	0
DDB0266909	0	0	0	0	0	0
DDB0266914	0	0	0	0	0	0
DDB0267074	0	0	0	0	0	0
DDB0267108	3	4	3	3	3	0
DDB0302369	0	0	0	0	0	0
DDB0302389	3	5	9	0	5	4
DDB0302391	0	0	0	0	0	0
DDB0302397	0	0	0	0	0	0
DDB0302400	10	8	0	1	1	3
DDB0302539	2	0	0	4	1	2
DDB0302544	12	4	0	1	9	8
DDB0302545	76	62	56	50	50	51
DDB0302547	0	0	0	0	0	0
DDB0302548	0	0	0	0	0	0
DDB0302662	0	0	0	0	0	0
DDB0302694	0	0	0	0	0	0
DDB0304401	0	0	0	0	0	0
DDB0304454	0	0	0	0	0	0
DDB0304588	0	0	0	0	0	0
DDB0304734	0	0	0	2	0	0
DDB0304735	0	8	4	0	0	0
DDB0304741	0	0	0	0	0	0
DDB0304743	0	9	6	0	0	1
DDB0304744	0	0	0	0	0	0
DDB0304747	0	4	0	0	0	0
DDB0304766	0	0	0	0	0	0
DDB0304790	0	0	0	0	0	0
DDB0304792	0	0	0	0	0	0
DDB0304793	0	0	0	0	1	0
DDB0304794	0	0	0	0	0	0
DDB0304795	0	13	1	0	0	0
DDB0304798	0	0	0	0	0	0
DDB0304799	5	1	0	0	0	0
DDB0304801	0	0	0	0	0	0
DDB0304802	0	0	0	0	0	0
DDB0304804	0	4	0	0	0	0
DDB0304813	2	0	0	0	0	0
DDB0304841	1	0	0	0	0	0
DDB0304924	0	0	0	0	0	0
DDB0304937	0	0	0	0	0	0
DDB0304938	0	0	0	0	0	0
DDB0304958	1	2	1	0	0	0
DDB0305062	0	0	0	0	0	0
DDB0305143	0	0	0	0	0	0
DDB0305266	0	0	0	0	0	0
DDB0305303	15	9	8	3	4	12
DDB0305438	0	0	0	0	0	0
DDB0305494	0	0	0	0	0	0
DDB0305523	0	1	0	0	0	0
DDB0305525	0	0	1	1	0	1
DDB0305532	0	0	0	0	0	0
DDB0305539	0	0	0	0	0	0
DDB0305740	11	9	2	9	9	10
DDB0305793	92	83	68	83	60	85
DDB0305816	4	2	21	2	1	8
DDB0305817	1	8	0	8	2	2
DDB0305904	105	86	116	88	66	108
DDB0307037	0	1	0	0	6	0
DDB0307266	0	0	0	0	1	0
DDB0307770	0	0	0	0	0	0
DDB0308237	36	34	45	15	26	12
DDB0308504	25	28	16	11	4	15
DDB0308525	0	2	3	0	9	9
DDB0308803	0	0	1	1	0	2
DDB0309122	4	21	3	23	6	6
DDB0346543	0	0	0	0	0	0
DDB0346591	5	16	18	18	27	33
DDB0346661	1	2	0	1	2	2
DDB0346788	14	21	31	9	8	11
DDB0346791	0	0	0	0	0	0
DDB0346890	18	33	24	24	25	25
DDB0346992	0	0	0	0	0	0
DDB0347004	0	0	2	1	0	0
DDB0347023	0	0	0	0	0	0
DDB0347027	0	0	0	0	0	0
DDB0347031	1	2	0	4	1	1
DDB0347038	1	4	1	2	1	3
DDB0347091	0	0	0	0	0	0
DDB0347129	8	1	1	4	1	3
DDB0347135	0	10	4	6	7	0
DDB0347168	0	0	0	0	0	0
DDB0347170	0	3	1	0	0	0
DDB0347198	13	6	6	0	0	3
DDB0347204	0	0	0	0	0	0
DDB0347217	8	6	7	9	20	12
DDB0347225	0	0	0	0	1	0
DDB0347226	0	0	0	0	1	1
DDB0347227	38	16	31	25	22	27
DDB0347243	0	0	0	0	0	0
DDB0347252	0	0	0	0	0	3
DDB0347262	0	0	0	0	0	0
DDB0347303	0	0	0	0	4	0
DDB0347304	0	0	0	0	0	0
DDB0347316	0	1	1	0	0	0
DDB0347339	0	0	0	0	0	0
DDB0347344	0	3	1	0	0	0
DDB0347347	0	0	0	0	0	0
DDB0347358	0	0	0	0	0	0
DDB0347360	0	0	0	0	0	0
DDB0347372	0	0	0	0	0	0
DDB0347423	0	1	0	0	0	0
DDB0347443	0	0	0	0	0	0
DDB0347456	0	0	0	0	0	0
DDB0347458	0	0	0	0	0	0
DDB0347463	7	0	1	0	0	0
DDB0347464	0	0	0	0	0	0
DDB0347466	0	0	0	0	0	0
DDB0347471	13	1	4	3	1	2
DDB0347472	0	0	0	0	0	0
DDB0347479	0	5	1	0	1	0
DDB0347490	0	0	0	0	0	0
DDB0347491	0	0	0	0	0	0
DDB0347492	0	0	0	0	0	0
DDB0347498	3	1	0	0	0	1
DDB0347500	0	0	0	0	0	0
DDB0347508	0	0	0	0	0	0
DDB0347512	0	4	0	0	0	0
DDB0347514	0	0	0	0	0	0
DDB0347521	0	0	0	0	0	0
DDB0347522	0	0	0	0	0	0
DDB0347537	0	0	0	0	0	2
DDB0347554	0	0	0	0	0	0
DDB0347563	16	1	2	11	8	14
DDB0347564	0	0	0	0	0	0
DDB0347574	0	2	0	0	0	0
DDB0347597	0	0	0	0	0	0
DDB0347624	0	0	0	0	0	0
DDB0347647	31	9	25	20	24	22
DDB0347648	0	0	0	0	0	0
DDB0347651	10	10	2	0	10	9
DDB0347654	0	0	0	0	0	0
DDB0347664	6	22	8	9	3	6
DDB0347665	6	0	0	0	3	0
DDB0347691	0	0	0	0	0	0
DDB0347697	0	0	0	0	0	0
DDB0347700	3	6	9	6	0	15
DDB0347701	0	0	0	0	0	0
DDB0347703	0	0	0	0	0	0
DDB0347706	0	2	3	0	7	4
DDB0347714	0	0	0	0	0	0
DDB0347719	0	0	4	0	0	1
DDB0347730	0	0	0	0	0	0
DDB0347734	0	0	1	3	0	1
DDB0347741	0	0	0	0	0	0
DDB0347742	0	0	0	0	0	0
DDB0347745	0	0	0	0	0	0
DDB0347753	3	2	2	4	0	0
DDB0347787	0	0	0	0	0	0
DDB0347790	0	0	0	0	0	0
DDB0347791	9	5	4	1	1	0
DDB0347792	0	0	0	0	0	0
DDB0347795	0	0	0	0	0	0
DDB0347798	0	0	0	0	0	0
DDB0347801	0	0	0	0	0	0
DDB0347811	0	0	0	0	0	0
DDB0347812	2	4	4	2	0	0
DDB0347813	0	0	0	0	0	0
DDB0347817	0	0	0	0	2	0
DDB0347818	0	0	0	0	0	0
DDB0347820	3	3	3	0	0	0
DDB0347821	0	0	0	0	0	0
DDB0347831	0	0	0	0	0	0
DDB0347832	0	1	0	0	0	0
DDB0347837	1	1	2	0	1	3
DDB0347838	39	57	19	43	35	88
DDB0347848	0	0	0	2	0	0
DDB0347850	0	0	0	0	0	0
DDB0347852	0	0	0	0	3	0
DDB0347858	0	0	0	0	0	0
DDB0347863	381	385	305	294	299	318
DDB0347865	0	0	0	0	0	0
DDB0347890	0	0	0	0	0	0
DDB0347894	0	0	0	0	0	0
DDB0347895	0	0	0	0	0	0
DDB0347898	5	0	1	0	2	2
DDB0347899	0	0	0	0	0	0
DDB0347912	0	0	0	0	0	0
DDB0347913	0	0	0	0	0	0
DDB0347933	0	0	0	0	0	0
DDB0347934	0	0	0	0	0	0
DDB0347935	0	0	0	0	0	0
DDB0347939	3	0	3	0	1	5
DDB0347940	0	0	0	0	0	0
DDB0347941	0	0	4	0	0	4
DDB0347945	0	0	0	0	0	0
DDB0347952	0	0	0	0	0	0
DDB0347954	0	0	0	0	0	0
DDB0347959	5	0	0	0	0	2
DDB0347960	0	0	0	0	0	0
DDB0347961	0	0	0	0	0	0
DDB0347962	0	0	0	0	0	0
DDB0347969	6	11	6	0	3	0
DDB0347970	0	0	0	0	0	0
DDB0347974	0	0	0	5	5	1
DDB0347975	0	0	2	0	2	3
DDB0347976	5	2	10	1	4	10
DDB0347977	4	0	0	0	5	0
DDB0347978	0	0	0	0	0	0
DDB0347979	0	1	0	1	0	5
DDB0347980	1	0	3	4	15	0
DDB0347981	15	0	0	0	0	3
DDB0347982	7	4	1	2	1	0
DDB0347984	0	0	0	0	0	0
DDB0347985	0	0	0	0	0	0
DDB0347998	0	0	1	0	2	0
DDB0347999	0	0	0	0	0	0
DDB0348001	0	0	0	0	0	0
DDB0348006	0	0	0	0	0	0
DDB0348009	0	0	0	0	0	0
DDB0348010	0	0	0	0	2	0
DDB0348017	0	0	0	0	0	0
DDB0348020	0	0	0	0	0	0
DDB0348021	0	0	0	0	0	0
DDB0348022	0	0	0	0	0	0
DDB0348024	0	0	0	1	0	0
DDB0348029	0	0	0	0	0	0
DDB0348034	77	64	53	110	89	100
DDB0348036	0	1	0	0	2	0
DDB0348037	2	1	0	1	3	2
DDB0348048	10	13	10	2	5	10
DDB0348052	0	0	0	0	0	0
DDB0348053	0	0	0	0	0	0
DDB0348055	0	0	0	0	0	0
DDB0348057	0	0	0	0	6	0
DDB0348059	0	0	0	0	0	0
DDB0348061	91	93	81	63	58	78
DDB0348068	5	0	0	0	7	1
DDB0348070	0	1	0	0	2	6
DDB0348074	7	3	2	0	1	1
DDB0348082	1	4	3	4	1	7
DDB0348086	2	1	1	3	2	5
DDB0348093	0	0	0	0	0	0
DDB0348095	0	0	0	0	0	0
DDB0348108	3	1	0	1	0	3
DDB0348109	4	8	2	0	0	6
DDB0348114	3	4	0	0	0	0
DDB0348135	5	1	0	7	4	1
DDB0348141	1	4	7	3	4	4
DDB0348160	0	0	0	0	0	0
DDB0348162	7	1	0	0	0	0
DDB0348163	0	0	0	0	0	0
DDB0348164	0	0	0	0	0	0
DDB0348165	6	1	4	0	1	0
DDB0348166	0	0	0	0	3	0
DDB0348167	0	0	0	3	0	0
DDB0348168	0	0	0	0	0	0
DDB0348169	0	0	0	0	0	0
DDB0348177	0	0	0	0	0	0
DDB0348189	34	24	32	27	27	31
DDB0348201	0	0	0	0	0	0
DDB0348205	0	0	0	0	0	0
DDB0348207	0	1	0	0	0	0
DDB0348214	0	0	0	0	0	0
DDB0348217	0	0	0	0	0	0
DDB0348221	3	8	0	2	0	6
DDB0348229	0	0	0	0	0	0
DDB0348230	0	0	0	0	0	0
DDB0348231	0	0	0	0	0	0
DDB0348232	0	0	0	0	0	0
DDB0348237	0	1	0	0	0	0
DDB0348247	0	0	0	0	0	0
DDB0348259	1	2	0	0	0	0
DDB0348267	0	0	0	0	0	0
DDB0348268	0	0	0	0	0	0
DDB0348277	0	0	0	0	0	0
DDB0348288	0	0	0	0	0	2
DDB0348294	9	18	0	7	10	11
DDB0348296	0	0	0	1	0	0
DDB0348297	0	0	0	0	0	0
DDB0348300	0	0	0	0	0	0
DDB0348306	0	0	1	0	0	0
DDB0348311	0	0	0	0	0	0
DDB0348316	0	0	0	0	0	0
DDB0348331	0	0	0	0	0	0
DDB0348344	0	0	0	0	0	0
DDB0348354	0	6	0	18	2	6
DDB0348364	0	0	0	0	0	0
DDB0348368	0	1	0	4	0	0
DDB0348369	0	0	0	0	0	1
DDB0348378	0	0	0	0	0	0
DDB0348380	5	0	0	0	0	0
DDB0348381	3	0	7	0	6	6
DDB0348386	0	0	0	0	0	0
DDB0348392	0	0	0	0	0	0
DDB0348393	0	4	2	0	0	0
DDB0348398	0	0	0	0	0	0
DDB0348399	0	0	0	0	0	0
DDB0348401	0	1	0	0	0	0
DDB0348403	0	0	0	0	0	0
DDB0348405	0	0	0	0	0	0
DDB0348413	1	0	0	0	0	0
DDB0348416	0	3	4	2	0	5
DDB0348417	0	0	0	0	0	0
DDB0348419	0	0	0	0	0	0
DDB0348420	0	0	0	0	0	0
DDB0348424	0	0	4	0	0	0
DDB0348431	0	0	0	0	0	0
DDB0348432	56	18	18	15	4	17
DDB0348435	0	0	3	0	0	0
DDB0348438	0	0	0	0	0	0
DDB0348441	0	0	0	0	0	0
DDB0348442	0	0	0	0	0	0
DDB0348443	0	0	0	0	0	5
DDB0348445	0	0	0	0	0	0
DDB0348448	0	0	1	0	0	0
DDB0348452	0	0	0	0	0	0
DDB0348453	7	10	13	3	4	8
DDB0348454	0	0	0	0	0	0
DDB0348460	0	1	0	0	0	0
DDB0348467	0	0	0	0	0	0
DDB0348483	0	0	0	1	0	0
DDB0348484	0	0	0	0	0	0
DDB0348486	0	0	0	1	0	0
DDB0348498	2	1	0	0	2	3
DDB0348510	7	14	6	1	8	4
DDB0348518	0	3	4	0	0	0
DDB0348531	0	0	0	0	0	0
DDB0348532	0	1	0	0	0	0
DDB0348536	0	0	0	0	0	0
DDB0348548	0	0	1	0	0	0
DDB0348550	0	0	0	0	0	0
DDB0348573	9	0	0	3	8	7
DDB0348574	0	0	0	3	0	0
DDB0348582	0	0	0	0	0	0
DDB0348583	0	0	0	0	0	0
DDB0348585	0	0	0	0	0	0
DDB0348590	3	10	5	0	1	4
DDB0348596	0	0	0	0	0	0
DDB0348597	185	192	140	146	198	152
DDB0348598	0	0	0	2	4	0
DDB0348605	50	26	14	18	17	17
DDB0348606	18	7	4	0	4	9
DDB0348611	0	0	0	0	0	0
DDB0348627	0	0	0	0	0	0
DDB0348634	24	18	18	4	16	10
DDB0348635	0	0	0	0	0	0
DDB0348636	0	0	0	0	0	0
DDB0348642	0	0	0	1	0	0
DDB0348646	0	11	0	4	3	0
DDB0348649	0	0	0	0	0	0
DDB0348650	0	0	0	0	0	0
DDB0348661	0	0	0	0	0	0
DDB0348662	0	0	0	0	0	0
DDB0348669	0	2	0	0	0	0
DDB0348670	0	0	0	0	1	0
DDB0348672	0	0	0	2	0	0
DDB0348679	4	6	3	10	4	1
DDB0348681	0	0	0	0	0	0
DDB0348683	0	0	0	0	0	0
DDB0348684	0	0	0	0	0	0
DDB0348685	0	0	0	0	0	0
DDB0348688	0	0	3	0	0	0
DDB0348702	0	0	0	0	0	0
DDB0348704	0	0	0	0	0	0
DDB0348705	0	0	0	0	0	0
DDB0348714	0	0	0	0	0	0
DDB0348715	0	0	0	0	0	0
DDB0348724	3	5	28	7	3	7
DDB0348725	0	0	2	3	0	8
DDB0348726	0	0	0	0	0	0
DDB0348729	0	1	0	0	4	0
DDB0348730	0	3	2	2	0	0
DDB0348731	0	3	0	6	2	2
DDB0348733	1	0	3	0	0	0
DDB0348734	9	13	8	9	9	6
DDB0348743	6	7	7	7	8	0
DDB0348747	0	1	0	0	4	0
DDB0348755	0	0	0	0	0	0
DDB0348759	0	2	0	0	0	1
DDB0348760	1	0	0	1	2	0
DDB0348761	0	0	0	0	0	0
DDB0348774	0	0	0	0	0	0
DDB0348777	0	0	0	0	0	0
DDB0348779	1	0	0	0	0	0
DDB0348780	0	0	0	0	0	0
DDB0348782	0	2	1	0	0	0
DDB0348795	6	0	0	1	0	0
DDB0348806	0	0	0	0	0	0
DDB0348809	0	0	0	0	0	0
DDB0348810	0	0	0	0	0	0
DDB0348812	0	0	0	0	0	0
DDB0348815	6	7	6	6	15	4
DDB0348816	0	0	0	2	0	0
DDB0348818	0	0	0	0	0	0
DDB0348823	0	0	0	0	0	0
DDB0348845	0	0	0	0	4	0
DDB0348870	0	0	0	0	0	0
DDB0348874	0	0	0	0	0	0
DDB0348877	0	0	0	0	0	0
DDB0348879	1	0	4	0	0	0
DDB0348880	1	2	3	4	0	0
DDB0348881	14	2	6	0	4	1
DDB0348887	0	0	0	0	0	0
DDB0348888	1	0	0	0	0	0
DDB0348892	0	0	0	0	0	0
DDB0348898	0	0	4	0	6	2
DDB0348906	0	0	0	3	0	0
DDB0348912	0	0	0	0	0	0
DDB0348923	0	0	0	0	0	0
DDB0348924	0	0	0	0	0	0
DDB0348926	0	0	0	0	0	0
DDB0348927	0	0	0	0	0	0
DDB0348928	0	0	0	0	0	0
DDB0348931	0	0	0	0	0	0
DDB0348943	0	0	0	0	0	0
DDB0348946	14	3	10	4	0	10
DDB0348948	3	7	1	7	0	0
DDB0348953	0	0	3	0	0	0
DDB0348964	0	0	3	0	0	0
DDB0348966	14	11	18	11	6	3
DDB0348970	0	0	0	0	0	0
DDB0348971	0	0	1	0	0	0
DDB0348972	0	0	0	0	0	0
DDB0348973	6	24	9	12	1	7
DDB0348974	0	0	0	0	0	0
DDB0348976	0	0	0	0	4	0
DDB0348978	0	0	0	0	0	0
DDB0348980	0	0	0	0	0	0
DDB0348983	0	0	0	0	0	0
DDB0348984	0	0	0	0	0	0
DDB0348985	6	1	3	9	8	29
DDB0348986	2	1	0	2	1	1
DDB0348993	0	0	0	0	0	0
DDB0349001	0	0	0	0	0	0
DDB0349004	2	0	0	1	0	0
DDB0349008	0	0	0	0	0	0
DDB0349009	0	0	0	0	0	0
DDB0349018	0	0	0	0	0	0
DDB0349021	0	0	0	0	0	0
DDB0349023	1	0	0	0	0	0
DDB0349025	14	13	18	10	6	3
DDB0349032	0	0	0	0	0	1
DDB0349037	0	0	0	0	0	0
DDB0349039	0	0	0	0	0	0
DDB0349046	0	0	0	0	0	0
DDB0349050	0	0	0	2	0	1
DDB0349062	0	0	0	0	0	0
DDB0349070	0	0	0	0	0	0
DDB0349071	0	0	0	0	0	0
DDB0349077	5	1	3	3	0	1
DDB0349078	4	3	4	1	7	5
DDB0349080	0	0	0	0	0	0
DDB0349082	0	0	0	0	0	0
DDB0349087	0	0	0	0	0	0
DDB0349093	0	0	0	0	0	0
DDB0349105	7	1	0	0	1	0
DDB0349108	2	0	2	1	0	2
DDB0349109	8	3	6	8	4	3
DDB0349112	15	10	8	3	14	13
DDB0349113	37	40	21	30	37	39
DDB0349120	0	0	0	0	0	0
DDB0349121	0	0	0	0	0	0
DDB0349123	0	0	3	0	0	0
DDB0349132	0	0	0	0	0	0
DDB0349143	0	0	1	0	3	0
DDB0349146	0	0	0	0	0	0
DDB0349149	43	68	45	32	34	41
DDB0349150	7	6	2	8	9	11
DDB0349156	0	0	0	0	0	0
DDB0349157	0	0	0	0	0	0
DDB0349158	0	0	0	0	0	0
DDB0349162	0	0	0	5	0	0
DDB0349166	0	3	2	0	0	3
DDB0349169	0	0	0	0	0	0
DDB0349172	0	2	0	0	0	2
DDB0349173	0	0	0	0	0	0
DDB0349176	0	0	0	0	0	0
DDB0349177	0	0	0	0	0	0
DDB0349178	0	0	0	0	0	0
DDB0349180	0	0	0	0	0	0
DDB0349184	0	0	0	0	0	0
DDB0349195	0	0	0	0	0	0
DDB0349201	0	0	0	0	0	0
DDB0349210	0	0	0	1	0	0
DDB0349211	2	0	1	2	0	0
DDB0349219	0	0	0	0	0	0
DDB0349225	0	0	0	0	0	2
DDB0349228	0	0	0	0	0	0
DDB0349241	5	0	2	1	0	1
DDB0349246	0	0	0	0	0	0
DDB0349254	0	0	1	0	0	0
DDB0349257	0	0	0	0	0	0
DDB0349260	0	2	0	0	0	0
DDB0349269	0	0	0	0	0	0
DDB0349270	0	0	0	0	0	0
DDB0349272	0	0	0	0	0	0
DDB0349273	0	0	0	0	4	0
DDB0349274	0	0	7	0	0	3
DDB0349276	0	0	0	0	0	0
DDB0349277	0	0	0	0	0	0
DDB0349286	5	2	1	0	4	0
DDB0349288	0	0	2	0	0	0
DDB0349295	0	0	0	0	0	0
DDB0349298	0	0	0	1	0	0
DDB0349299	0	0	0	0	0	0
DDB0349300	0	0	0	0	0	0
DDB0349306	0	0	0	0	0	0
DDB0349313	0	0	0	0	0	0
DDB0349315	0	0	0	0	0	0
DDB0349334	0	0	0	0	0	0
DDB0349369	0	0	0	0	0	0
DDB0349370	2	1	4	1	2	2
DDB0349396	0	0	3	0	0	0
DDB0349399	0	0	0	0	0	6
DDB0349403	0	0	0	0	0	0
DDB0349407	0	0	0	0	0	0
DDB0349410	0	0	0	0	0	0
DDB0349414	0	0	0	0	0	0
DDB0349415	0	0	0	1	5	0
DDB0349421	0	6	0	2	10	3
DDB0349432	1	0	3	0	2	0
DDB0349445	17	0	0	2	2	2
DDB0349448	0	0	0	0	0	0
DDB0349455	0	0	0	0	0	0
DDB0349458	0	0	0	0	0	0
DDB0349463	0	0	0	0	0	0
DDB0349472	0	0	0	0	0	0
DDB0349477	0	0	0	0	0	0
DDB0349478	7	7	8	8	5	4
DDB0349480	2	6	1	4	2	0
DDB0349483	0	0	0	0	0	0
DDB0349492	6	1	6	4	6	1
DDB0349500	0	0	2	0	1	0
DDB0349514	0	2	0	0	0	0
DDB0349523	43	46	29	44	25	51
DDB0349525	0	0	0	0	0	0
DDB0349534	0	0	0	0	0	0
DDB0349538	0	0	0	0	0	0
DDB0349762	1	1	2	0	2	0
DDB0349835	0	0	0	0	0	0
DDB_G0267178	59	56	70	24	33	32
DDB_G0267180	187	175	153	150	138	129
DDB_G0267182	145	119	101	40	47	46
DDB_G0267184	171	132	120	97	74	92
DDB_G0267186	32	45	39	29	36	39
DDB_G0267188	104	79	88	57	70	69
DDB_G0267190	1	0	0	1	0	0
DDB_G0267194	0	1	0	0	0	0
DDB_G0267196	2	5	2	1	0	0
DDB_G0267198	1	1	0	0	0	0
DDB_G0267202	0	0	0	0	0	0
DDB_G0267204	0	0	0	0	0	0
DDB_G0267206	53	36	36	36	33	24
DDB_G0267208	98	82	78	56	50	58
DDB_G0267210	325	280	260	171	177	190
DDB_G0267216	0	0	0	0	0	0
DDB_G0267218	0	0	0	0	0	0
DDB_G0267220	0	2	0	0	0	0
DDB_G0267222	0	1	0	0	0	0
DDB_G0267224	0	0	0	0	0	0
DDB_G0267226	0	0	0	0	0	0
DDB_G0267228	1	2	1	4	0	5
DDB_G0267230	4	4	0	4	5	1
DDB_G0267236	1382	1372	1223	1036	1106	1012
DDB_G0267238	768	726	623	498	569	503
DDB_G0267240	210	213	202	77	77	98
DDB_G0267242	215	201	214	182	118	185
DDB_G0267244	125	130	111	68	63	63
DDB_G0267246	195	199	212	185	135	172
DDB_G0267248	4	12	19	6	4	9
DDB_G0267250	8	32	16	2	3	4
DDB_G0267252	6	6	2	2	6	4
DDB_G0267254	0	0	0	0	0	0
DDB_G0267258	252	231	165	81	87	90
DDB_G0267260	227	200	185	145	169	165
DDB_G0267262	113	102	109	43	36	37
DDB_G0267264	144	114	109	72	95	78
DDB_G0267270	11	9	11	5	6	14
DDB_G0267272	21	13	20	16	26	23
DDB_G0267274	2	0	0	3	0	2
DDB_G0267278	0	3	3	1	0	1
DDB_G0267280	4	1	0	5	0	0
DDB_G0267282	85	61	57	48	64	48
DDB_G0267286	0	0	0	0	0	0
DDB_G0267292	936	1041	825	617	748	760
DDB_G0267294	729	677	587	159	148	142
DDB_G0267296	0	0	0	2	1	2
DDB_G0267298	0	0	0	0	0	0
DDB_G0267300	283	258	276	150	160	145
DDB_G0267302	0	1	0	0	0	0
DDB_G0267304	223	192	183	72	77	77
DDB_G0267306	110	113	120	312	395	347
DDB_G0267308	72	74	70	170	215	153
DDB_G0267310	63	70	42	198	208	244
DDB_G0267314	137	144	97	100	116	109
DDB_G0267322	0	2	2	0	3	8
DDB_G0267324	353	303	295	230	228	230
DDB_G0267326	213	184	179	81	84	104
DDB_G0267328	245	246	222	115	112	123
DDB_G0267330	197	178	150	127	134	144
DDB_G0267332	0	3	1	0	0	2
DDB_G0267334	29	22	22	13	12	20
DDB_G0267336	0	0	0	1	0	0
DDB_G0267338	15	29	31	16	13	14
DDB_G0267342	226	159	180	55	83	81
DDB_G0267344	0	1	2	1	0	1
DDB_G0267346	0	3	0	0	0	0
DDB_G0267348	0	3	0	0	0	2
DDB_G0267350	3	0	0	1	0	0
DDB_G0267352	7	9	9	5	8	11
DDB_G0267354	76	65	64	78	68	66
DDB_G0267356	376	334	340	836	1052	918
DDB_G0267358	310	308	298	827	978	898
DDB_G0267362	278	271	273	689	838	729
DDB_G0267364	118	130	107	287	351	352
DDB_G0267366	863	895	843	2513	2745	2549
DDB_G0267370	5	6	3	4	3	2
DDB_G0267372	314	263	269	144	155	194
DDB_G0267374	660	548	561	537	544	585
DDB_G0267376	2955	2651	2408	2040	2251	2237
DDB_G0267378	0	1	0	1	0	5
DDB_G0267380	7966	6966	6674	7467	6405	6739
DDB_G0267382	11366	10401	10590	9489	10066	9745
DDB_G0267384	140	172	141	167	154	183
DDB_G0267386	4802	4537	4016	3896	3711	4051
DDB_G0267388	56	42	38	29	40	19
DDB_G0267390	407	505	456	572	674	574
DDB_G0267392	61	38	51	67	62	46
DDB_G0267394	204	229	233	220	152	225
DDB_G0267396	81	70	85	77	70	89
DDB_G0267398	74	66	81	72	73	63
DDB_G0267400	19433	18159	16561	16186	17234	17042
DDB_G0267402	4763	4528	4288	4314	3593	3820
DDB_G0267404	1846	1656	1722	1606	1558	1494
DDB_G0267406	393	367	302	295	382	373
DDB_G0267408	170	222	146	265	260	199
DDB_G0267410	183	142	157	130	129	108
DDB_G0267412	0	3	0	0	0	0
DDB_G0267414	341	316	304	386	296	359
DDB_G0267416	153	185	160	165	258	174
DDB_G0267418	31327	30369	30086	31649	31384	32051
DDB_G0267420	2284	2123	2413	2020	1775	2128
DDB_G0267422	1726	1291	1306	1330	1309	1522
DDB_G0267424	221	222	257	183	154	156
DDB_G0267426	936	856	675	579	444	543
DDB_G0267428	47	30	14	29	32	37
DDB_G0267430	39	66	39	31	27	44
DDB_G0267432	448	357	418	221	204	239
DDB_G0267434	0	0	2	0	0	0
DDB_G0267436	8049	7733	6610	7251	7032	7573
DDB_G0267438	564	526	591	487	475	472
DDB_G0267440	12	2	21	12	1	1
DDB_G0267442	39	72	55	81	63	50
DDB_G0267444	1219	1213	1126	1196	1266	1346
DDB_G0267446	133	99	105	166	147	126
DDB_G0267448	128	117	121	142	94	117
DDB_G0267450	927	735	832	744	648	697
DDB_G0267452	1346	1414	1435	1365	1476	1300
DDB_G0267454	9579	9280	9132	8607	8375	8402
DDB_G0267456	1339	1097	1034	1372	1455	1458
DDB_G0267458	777	712	599	712	721	720
DDB_G0267460	142	125	122	178	146	175
DDB_G0267462	234	317	259	251	199	222
DDB_G0267464	207	197	155	140	161	170
DDB_G0267466	268	313	216	246	214	245
DDB_G0267468	2	1	1	6	5	5
DDB_G0267470	315	305	238	222	200	185
DDB_G0267472	1301	1310	1087	1079	1155	1200
DDB_G0267474	3	15	4	7	7	1
DDB_G0267476	2	0	4	0	2	1
DDB_G0267480	1697	1489	1360	1309	1511	1429
DDB_G0267482	1137	1093	925	904	835	996
DDB_G0267484	93	101	92	76	60	84
DDB_G0267486	185	82	109	76	59	91
DDB_G0267488	17	30	23	24	44	29
DDB_G0267490	164	166	139	133	96	119
DDB_G0267492	681	586	568	721	564	625
DDB_G0267494	42	16	32	26	17	16
DDB_G0267496	3378	3197	2726	2084	2364	2149
DDB_G0267498	29	26	47	23	29	24
DDB_G0267500	89	107	104	83	76	83
DDB_G0267502	187	181	155	158	140	198
DDB_G0267504	266	271	208	266	278	251
DDB_G0267506	81	43	62	55	52	43
DDB_G0267508	2108	1991	1714	1689	1281	1564
DDB_G0267510	14	9	8	8	9	8
DDB_G0267512	102	89	106	98	127	81
DDB_G0267514	1474	1610	1432	1353	1354	1346
DDB_G0267516	338	322	418	271	269	258
DDB_G0267522	37	22	38	27	24	22
DDB_G0267524	538	580	486	650	557	604
DDB_G0267526	1091	931	806	854	772	870
DDB_G0267528	8222	6908	6498	9873	8655	9239
DDB_G0267530	4980	5701	5418	4122	3950	4468
DDB_G0267532	7	13	3	7	5	6
DDB_G0267534	863	889	743	696	627	737
DDB_G0267536	436	494	472	357	293	382
DDB_G0267538	1588	1464	1429	1166	1193	1193
DDB_G0267540	395	357	400	320	402	359
DDB_G0267542	3	6	10	7	2	0
DDB_G0267544	5	8	19	7	0	11
DDB_G0267546	96	72	97	89	69	74
DDB_G0267548	399	368	409	305	318	263
DDB_G0267550	0	0	3	1	0	0
DDB_G0267552	658	575	609	428	458	511
DDB_G0267554	57	61	56	38	56	58
DDB_G0267556	340	361	338	288	304	363
DDB_G0267560	173	163	156	278	173	184
DDB_G0267562	0	4	13	3	2	0
DDB_G0267564	14	0	8	0	7	20
DDB_G0267566	0	0	0	0	0	1
DDB_G0267568	6648	6204	5696	4298	4876	4976
DDB_G0267570	993	860	989	462	435	502
DDB_G0267572	70	48	50	53	84	61
DDB_G0267574	131	127	134	116	107	113
DDB_G0267576	8	4	8	4	7	10
DDB_G0267578	3	12	0	17	4	2
DDB_G0267580	5	3	0	1	0	0
DDB_G0267582	102	73	137	120	92	109
DDB_G0267584	216	198	215	201	211	224
DDB_G0267586	81	68	70	57	27	63
DDB_G0267588	2207	1870	1856	1595	1775	1723
DDB_G0267590	387	455	418	452	419	425
DDB_G0267592	1017	962	971	2224	2098	2270
DDB_G0267594	30	28	17	37	26	33
DDB_G0267596	492	383	359	290	279	362
DDB_G0267598	15	8	10	3	29	15
DDB_G0267600	1	0	2	0	0	0
DDB_G0267602	77	89	97	79	100	94
DDB_G0267604	99	98	65	93	113	87
DDB_G0267606	116	85	63	89	79	85
DDB_G0267608	6	21	2	6	5	6
DDB_G0267610	0	0	1	0	0	0
DDB_G0267612	0	1	0	0	0	0
DDB_G0267614	224	193	252	255	243	252
DDB_G0267616	200	237	180	209	182	192
DDB_G0267618	0	0	0	0	0	0
DDB_G0267620	0	2	1	4	0	3
DDB_G0267622	80	34	63	47	27	27
DDB_G0267624	272	197	217	178	196	219
DDB_G0267628	0	0	0	0	0	0
DDB_G0267630	66	95	72	83	112	48
DDB_G0267632	0	0	0	0	0	0
DDB_G0267634	1	0	0	0	0	0
DDB_G0267636	214	205	214	202	185	219
DDB_G0267638	8042	7441	6674	5317	5529	5502
DDB_G0267640	1119	944	1033	480	492	463
DDB_G0267642	9	8	6	3	0	5
DDB_G0267644	44	33	23	44	42	43
DDB_G0267646	1	3	1	1	0	0
DDB_G0267648	320	337	275	256	310	293
DDB_G0267650	216	192	131	197	165	207
DDB_G0267654	0	0	1	0	0	0
DDB_G0267656	122	103	68	102	42	110
DDB_G0267658	13	8	14	13	1	2
DDB_G0267660	0	0	0	0	0	0
DDB_G0267662	47	36	32	24	26	46
DDB_G0267666	357	285	301	253	274	231
DDB_G0267668	33	22	14	29	26	34
DDB_G0267670	332	328	353	336	263	327
DDB_G0267672	0	1	0	3	3	3
DDB_G0267674	1494	1348	1177	1031	974	915
DDB_G0267676	3	6	2	10	0	13
DDB_G0267678	0	0	0	0	0	0
DDB_G0267680	105	100	76	134	106	112
DDB_G0267682	419	455	379	350	354	379
DDB_G0267684	0	0	0	0	1	1
DDB_G0267686	2425	2139	2164	1702	1842	1736
DDB_G0267688	153	158	171	124	149	179
DDB_G0267690	632	561	551	469	480	487
DDB_G0267692	147	111	79	80	59	94
DDB_G0267694	4	0	0	2	0	0
DDB_G0267696	0	2	0	2	0	0
DDB_G0267698	0	5	4	4	1	0
DDB_G0267700	2	1	2	0	1	5
DDB_G0267702	1	0	0	0	0	0
DDB_G0267704	475	351	308	285	315	319
DDB_G0267706	51	68	60	32	63	47
DDB_G0267708	16	15	11	20	14	10
DDB_G0267710	308	290	283	222	211	215
DDB_G0267712	991	775	892	927	714	835
DDB_G0267714	658	690	717	544	608	565
DDB_G0267716	0	0	4	0	0	0
DDB_G0267718	79	70	80	63	40	103
DDB_G0267720	148	118	65	127	75	144
DDB_G0267722	77	80	97	136	77	81
DDB_G0267724	12	3	2	0	3	0
DDB_G0267726	38	19	26	20	19	45
DDB_G0267728	37	28	57	28	13	18
DDB_G0267730	6965	6542	5787	5268	5503	5046
DDB_G0267732	1654	1444	1288	1233	1215	1165
DDB_G0267734	5669	4806	4783	4307	4284	4662
DDB_G0267736	12	19	10	14	5	7
DDB_G0267740	0	4	6	0	0	0
DDB_G0267742	1	2	0	0	2	7
DDB_G0267744	53	38	86	56	32	46
DDB_G0267746	163	148	127	89	70	120
DDB_G0267748	206	163	146	162	159	161
DDB_G0267750	30	8	16	23	26	22
DDB_G0267752	3	0	6	1	2	5
DDB_G0267754	0	5	14	22	10	14
DDB_G0267756	83	46	57	41	43	43
DDB_G0267758	52	68	69	55	35	53
DDB_G0267760	274	195	163	230	208	217
DDB_G0267762	4	2	0	1	3	2
DDB_G0267764	1	0	3	0	3	0
DDB_G0267766	81	81	65	80	69	66
DDB_G0267768	47	36	30	33	23	21
DDB_G0267770	5	3	0	0	0	1
DDB_G0267772	1	0	0	0	0	0
DDB_G0267774	46	49	50	68	34	60
DDB_G0267776	2808	2600	2561	2024	2371	2167
DDB_G0267778	29	50	25	36	20	17
DDB_G0267780	122	124	100	77	87	91
DDB_G0267784	83	81	83	68	96	80
DDB_G0267786	529	556	390	625	629	679
DDB_G0267788	142	192	155	203	189	190
DDB_G0267790	421	269	284	258	223	350
DDB_G0267792	15	10	20	49	48	44
DDB_G0267794	650	624	574	533	543	588
DDB_G0267796	1586	1381	1461	1246	1200	1274
DDB_G0267798	745	709	685	514	546	502
DDB_G0267800	24	68	79	50	42	63
DDB_G0267802	2	0	5	1	1	2
DDB_G0267804	519	446	485	382	467	412
DDB_G0267806	0	0	0	0	0	0
DDB_G0267808	186	206	193	142	119	115
DDB_G0267810	370	404	295	255	279	271
DDB_G0267812	1	3	2	0	0	0
DDB_G0267814	27	6	19	34	18	28
DDB_G0267816	13	41	31	28	63	27
DDB_G0267818	708	570	532	378	421	375
DDB_G0267820	124	107	106	92	57	105
DDB_G0267822	498	403	392	348	374	409
DDB_G0267824	100	57	33	68	35	31
DDB_G0267826	8	14	7	0	0	0
DDB_G0267828	92	88	99	101	102	129
DDB_G0267830	97	51	53	50	68	56
DDB_G0267832	23	21	20	22	7	13
DDB_G0267834	38	62	43	43	48	44
DDB_G0267836	37	19	15	25	16	11
DDB_G0267838	177	142	153	172	179	268
DDB_G0267840	4	6	5	34	37	50
DDB_G0267842	0	6	0	4	2	0
DDB_G0267844	0	3	5	0	3	0
DDB_G0267846	19	16	23	13	12	26
DDB_G0267848	213	183	128	129	61	159
DDB_G0267850	1755	1539	1502	1400	1589	1493
DDB_G0267852	135	106	124	94	82	100
DDB_G0267854	1583	1610	1569	1281	1355	1310
DDB_G0267856	28	26	19	16	17	16
DDB_G0267858	34	15	29	19	17	21
DDB_G0267860	1	0	0	0	0	0
DDB_G0267862	0	0	0	0	0	1
DDB_G0267864	2	0	0	0	0	0
DDB_G0267866	857	775	745	909	876	966
DDB_G0267868	15	21	2	7	3	14
DDB_G0267870	192	158	130	118	91	110
DDB_G0267872	55	59	45	53	57	43
DDB_G0267874	21	43	30	31	44	34
DDB_G0267876	0	0	0	0	0	0
DDB_G0267878	11	1	2	5	7	12
DDB_G0267880	8	4	10	13	5	2
DDB_G0267882	1601	1287	1298	1042	1080	1153
DDB_G0267884	304	290	251	238	248	261
DDB_G0267886	734	659	501	487	431	427
DDB_G0267888	16	24	9	20	22	9
DDB_G0267890	645	547	572	456	411	424
DDB_G0267892	289	253	256	216	256	187
DDB_G0267894	1664	1590	1387	1268	1080	1263
DDB_G0267896	6	7	3	3	0	1
DDB_G0267898	0	0	1	0	0	0
DDB_G0267902	37	17	32	36	51	36
DDB_G0267904	169	207	250	184	169	165
DDB_G0267906	132	121	133	137	108	127
DDB_G0267908	60	42	26	28	15	25
DDB_G0267910	50	96	56	86	55	100
DDB_G0267914	93	69	91	76	55	70
DDB_G0267916	130	147	124	113	118	125
DDB_G0267918	206	209	183	193	194	148
DDB_G0267920	0	0	0	0	0	0
DDB_G0267922	0	0	0	0	0	0
DDB_G0267924	952	989	939	1042	1190	1052
DDB_G0267928	201	181	179	121	150	147
DDB_G0267930	4	32	8	1	1	6
DDB_G0267932	29	21	15	7	15	14
DDB_G0267934	0	1	0	1	6	3
DDB_G0267936	0	0	0	0	0	0
DDB_G0267938	88	53	46	49	66	41
DDB_G0267940	34	22	19	27	12	15
DDB_G0267942	547	544	473	551	444	589
DDB_G0267946	0	2	7	3	5	4
DDB_G0267948	2363	2387	2007	2105	2139	2152
DDB_G0267950	166	144	103	92	116	118
DDB_G0267952	48	51	34	47	20	34
DDB_G0267954	84	133	103	68	99	100
DDB_G0267956	6475	7037	6276	4763	5663	5350
DDB_G0267958	976	926	856	870	852	827
DDB_G0267960	249	275	253	217	236	240
DDB_G0267962	1624	1616	1710	1360	1481	1385
DDB_G0267964	0	0	0	0	0	0
DDB_G0267966	2280	2138	1961	1966	1986	1835
DDB_G0267968	28	7	10	11	2	10
DDB_G0267970	0	0	1	0	0	0
DDB_G0267974	692	751	603	517	542	469
DDB_G0267976	107	64	100	60	69	99
DDB_G0267978	1209	1167	1044	928	1177	1182
DDB_G0267980	89	104	84	96	85	115
DDB_G0267982	1378	1326	1259	1637	1662	1606
DDB_G0267984	85	130	101	126	100	105
DDB_G0267986	0	2	0	0	0	0
DDB_G0267988	48	49	21	23	14	21
DDB_G0267990	68	120	122	106	69	78
DDB_G0267992	44	76	56	37	36	25
DDB_G0267994	785	641	592	684	703	549
DDB_G0267996	156	103	176	123	157	146
DDB_G0267998	5	3	10	3	2	5
DDB_G0268000	113	101	118	83	134	107
DDB_G0268002	0	0	0	0	0	0
DDB_G0268004	1703	1866	1573	1246	1417	1354
DDB_G0268006	23	26	14	8	20	11
DDB_G0268008	78	49	37	40	49	53
DDB_G0268010	1	2	3	0	0	0
DDB_G0268012	51	33	27	8	13	42
DDB_G0268014	575	390	428	541	463	442
DDB_G0268016	0	0	0	0	0	0
DDB_G0268018	210	238	161	150	120	179
DDB_G0268020	708	769	580	775	649	775
DDB_G0268022	27	24	13	16	19	22
DDB_G0268024	184	187	187	185	233	198
DDB_G0268026	110	109	143	161	165	159
DDB_G0268028	77	75	51	58	106	53
DDB_G0268030	792	825	748	666	600	774
DDB_G0268034	1182	1138	1082	1181	1352	1286
DDB_G0268036	110	70	64	51	73	52
DDB_G0268038	1904	1701	1772	1675	1591	1584
DDB_G0268040	216	251	195	151	174	210
DDB_G0268042	7848	7425	6706	6507	5856	6445
DDB_G0268044	5526	5056	4322	3680	3847	3791
DDB_G0268046	0	0	0	0	1	3
DDB_G0268048	56	43	24	32	16	29
DDB_G0268050	0	0	0	0	0	0
DDB_G0268052	6675	6506	5555	4275	4582	4584
DDB_G0268054	61	83	76	85	87	68
DDB_G0268056	125	138	102	123	107	106
DDB_G0268058	0	2	0	0	0	0
DDB_G0268060	424	348	307	242	270	302
DDB_G0268062	4	8	1	16	6	7
DDB_G0268064	833	847	795	801	688	749
DDB_G0268066	124	85	63	71	78	92
DDB_G0268068	128	57	64	93	134	131
DDB_G0268070	66	77	53	83	61	69
DDB_G0268072	10	3	9	0	6	1
DDB_G0268074	41	25	41	35	36	50
DDB_G0268076	3	11	6	1	6	2
DDB_G0268078	152	195	189	132	184	156
DDB_G0268080	654	691	570	564	523	483
DDB_G0268082	24	23	19	14	18	12
DDB_G0268084	67	32	49	51	51	45
DDB_G0268086	0	0	1	0	0	0
DDB_G0268088	1031	875	831	623	639	667
DDB_G0268090	51	62	65	93	69	124
DDB_G0268092	69	48	39	71	19	63
DDB_G0268094	21	13	18	8	13	9
DDB_G0268096	27	14	2	22	10	10
DDB_G0268098	2056	2117	2252	1864	1924	1786
DDB_G0268100	273	333	288	227	248	240
DDB_G0268102	3943	3957	3588	3071	3218	3009
DDB_G0268104	1901	1826	1663	1637	1457	1652
DDB_G0268106	0	0	0	0	0	0
DDB_G0268108	2	2	4	8	1	3
DDB_G0268110	54	70	58	42	55	88
DDB_G0268112	130	86	101	80	67	96
DDB_G0268114	375	262	324	317	243	291
DDB_G0268116	44	52	39	32	59	60
DDB_G0268118	317	252	235	248	270	256
DDB_G0268120	0	0	0	0	0	0
DDB_G0268122	9	6	12	24	7	8
DDB_G0268124	0	0	0	0	0	0
DDB_G0268126	33	27	30	16	65	34
DDB_G0268128	0	0	0	0	0	1
DDB_G0268130	183	162	137	140	142	92
DDB_G0268132	795	639	674	512	497	520
DDB_G0268134	5116	4525	3811	3630	3967	3634
DDB_G0268136	10	15	8	15	2	10
DDB_G0268138	75	27	69	59	42	53
DDB_G0268140	1680	1254	1226	1477	1290	1554
DDB_G0268142	159	34	100	66	66	73
DDB_G0268144	2399	2266	2228	2269	1851	2073
DDB_G0268146	17	4	7	13	2	7
DDB_G0268148	1	2	1	0	0	2
DDB_G0268150	15	11	7	2	9	4
DDB_G0268152	7	0	0	4	0	0
DDB_G0268154	630	639	461	817	864	714
DDB_G0268156	157	102	143	101	90	112
DDB_G0268158	1107	966	966	618	689	609
DDB_G0268160	19	12	25	11	15	17
DDB_G0268162	459	454	411	352	363	346
DDB_G0268164	65	46	69	54	63	66
DDB_G0268166	0	0	2	0	0	0
DDB_G0268168	210	219	182	244	219	207
DDB_G0268170	0	0	4	4	0	0
DDB_G0268172	6	7	1	0	6	0
DDB_G0268174	0	3	0	0	0	0
DDB_G0268176	98	122	99	86	62	61
DDB_G0268178	13	2	9	2	1	3
DDB_G0268180	82	94	78	71	75	119
DDB_G0268182	1343	1062	993	1037	882	1151
DDB_G0268184	6	9	13	11	8	15
DDB_G0268186	295	229	221	184	148	170
DDB_G0268188	0	0	0	0	0	0
DDB_G0268190	106	68	95	65	70	84
DDB_G0268192	4	5	12	3	8	1
DDB_G0268194	235	237	163	243	231	227
DDB_G0268196	69	74	73	42	52	66
DDB_G0268198	25	36	44	22	41	16
DDB_G0268200	0	3	0	0	0	0
DDB_G0268202	55	58	49	61	36	46
DDB_G0268204	2	7	1	5	2	15
DDB_G0268206	0	0	0	0	0	0
DDB_G0268208	108	57	120	42	23	33
DDB_G0268210	37	28	40	14	24	13
DDB_G0268212	13	9	5	12	0	11
DDB_G0268214	0	0	0	0	0	0
DDB_G0268216	299	250	234	152	184	199
DDB_G0268218	76	75	85	73	71	51
DDB_G0268220	38	23	44	19	25	37
DDB_G0268222	1355	1077	1119	705	960	830
DDB_G0268224	94	59	49	68	70	86
DDB_G0268226	2	7	5	7	12	10
DDB_G0268228	125	107	146	95	92	167
DDB_G0268230	45	47	29	36	26	14
DDB_G0268232	2269	2139	1998	2337	2552	2515
DDB_G0268234	0	5	0	5	0	1
DDB_G0268236	6479	6087	5555	5409	5587	5388
DDB_G0268238	45	36	32	48	9	32
DDB_G0268240	0	0	0	0	0	0
DDB_G0268244	2326	2066	2053	1885	1984	1927
DDB_G0268246	110	90	121	83	89	118
DDB_G0268248	0	0	0	0	0	0
DDB_G0268250	0	0	0	0	0	0
DDB_G0268252	69	84	54	49	73	61
DDB_G0268254	0	0	0	0	0	0
DDB_G0268258	614	476	448	473	461	426
DDB_G0268260	48	49	55	36	80	82
DDB_G0268264	4776	4840	4581	4798	5086	4831
DDB_G0268266	1016	804	669	703	598	671
DDB_G0268268	185	169	154	142	126	179
DDB_G0268270	673	487	461	460	448	394
DDB_G0268272	3	0	10	0	0	0
DDB_G0268274	54	53	37	31	33	72
DDB_G0268278	2	11	1	1	1	3
DDB_G0268280	20	26	27	26	16	30
DDB_G0268284	0	3	2	0	3	0
DDB_G0268286	13	12	12	12	10	8
DDB_G0268288	48	21	42	8	25	36
DDB_G0268290	0	2	5	4	5	1
DDB_G0268292	1	2	7	0	2	0
DDB_G0268294	0	0	0	0	0	0
DDB_G0268298	0	0	0	0	0	0
DDB_G0268300	0	0	0	0	0	0
DDB_G0268302	13448	14236	13015	11264	10476	11821
DDB_G0268304	0	0	0	0	0	0
DDB_G0268306	17	16	13	7	11	2
DDB_G0268310	5	1	3	0	0	0
DDB_G0268312	0	7	2	0	1	0
DDB_G0268314	7	3	2	0	2	7
DDB_G0268316	132	112	115	118	132	70
DDB_G0268318	487	419	501	460	492	534
DDB_G0268320	1784	1744	1579	1837	1706	1972
DDB_G0268322	13	0	0	2	5	0
DDB_G0268324	5	2	8	2	8	2
DDB_G0268326	0	4	2	0	0	0
DDB_G0268328	1169	1174	1143	835	879	909
DDB_G0268330	93	156	104	57	94	96
DDB_G0268332	80	56	44	95	80	80
DDB_G0268334	284	277	220	188	173	160
DDB_G0268336	24	29	30	25	12	23
DDB_G0268338	0	0	0	0	0	0
DDB_G0268340	6	13	12	10	8	10
DDB_G0268342	0	0	0	0	0	0
DDB_G0268344	228	162	135	167	170	130
DDB_G0268346	28	67	31	35	54	78
DDB_G0268348	65	45	42	45	42	54
DDB_G0268350	227	210	161	167	167	197
DDB_G0268352	47	30	33	27	11	30
DDB_G0268354	363	357	331	356	369	400
DDB_G0268358	151	160	145	106	113	128
DDB_G0268360	723	720	746	576	554	622
DDB_G0268362	0	0	0	3	3	0
DDB_G0268364	1510	1380	1309	1015	1065	1048
DDB_G0268366	83	86	81	57	48	94
DDB_G0268368	1503	1517	1427	772	866	817
DDB_G0268370	0	0	0	0	0	0
DDB_G0268374	2	2	1	11	7	3
DDB_G0268376	1	3	2	2	0	3
DDB_G0268382	0	0	0	1	0	0
DDB_G0268384	395	381	339	344	311	308
DDB_G0268386	190	152	152	179	169	135
DDB_G0268388	0	0	0	0	0	0
DDB_G0268390	0	0	0	0	0	2
DDB_G0268394	790	721	767	616	653	610
DDB_G0268396	465	409	407	364	291	401
DDB_G0268398	3	0	0	0	2	6
DDB_G0268400	2	5	16	0	5	1
DDB_G0268402	908	772	683	946	1019	1089
DDB_G0268404	366	283	307	245	331	299
DDB_G0268406	1	0	0	0	0	0
DDB_G0268408	2	0	0	0	0	0
DDB_G0268410	299	323	294	255	241	265
DDB_G0268412	70	59	53	34	34	25
DDB_G0268420	11	20	24	15	4	8
DDB_G0268422	3	5	6	9	11	18
DDB_G0268424	155	94	153	107	113	136
DDB_G0268426	35	39	41	19	18	53
DDB_G0268428	0	0	0	0	0	0
DDB_G0268430	105	55	66	111	58	80
DDB_G0268432	31	12	19	21	13	16
DDB_G0268434	119	143	144	117	103	68
DDB_G0268438	0	0	0	0	1	0
DDB_G0268440	0	0	0	1	0	0
DDB_G0268442	230	255	218	106	134	150
DDB_G0268444	22	15	3	16	10	17
DDB_G0268446	132	146	158	327	337	253
DDB_G0268448	10	5	6	11	10	8
DDB_G0268450	3	0	0	2	5	0
DDB_G0268452	223	169	151	135	144	164
DDB_G0268454	15	6	19	5	3	3
DDB_G0268456	18	20	10	15	7	2
DDB_G0268458	0	0	0	0	0	0
DDB_G0268460	3	5	0	1	6	5
DDB_G0268462	194	230	282	103	69	106
DDB_G0268464	2	3	1	0	2	4
DDB_G0268466	0	1	0	1	0	1
DDB_G0268470	713	697	651	395	406	447
DDB_G0268472	482	464	447	400	272	393
DDB_G0268474	796	671	665	407	401	383
DDB_G0268476	3	0	2	3	3	1
DDB_G0268478	339	246	299	365	285	287
DDB_G0268480	21	28	31	20	15	17
DDB_G0268482	0	0	0	0	0	0
DDB_G0268484	5	5	0	0	2	0
DDB_G0268486	0	0	0	0	0	0
DDB_G0268488	0	0	0	0	0	0
DDB_G0268490	0	0	2	0	0	0
DDB_G0268492	206	171	191	161	182	181
DDB_G0268494	14	6	9	2	6	2
DDB_G0268496	161	176	192	152	261	183
DDB_G0268498	702	558	580	440	527	562
DDB_G0268500	753	674	602	564	616	556
DDB_G0268502	357	239	253	203	221	221
DDB_G0268504	11788	8936	9328	9046	8109	8807
DDB_G0268506	2108	1890	1657	1858	1867	1774
DDB_G0268508	24	15	21	17	12	15
DDB_G0268510	24	24	15	15	6	16
DDB_G0268512	221	245	196	217	228	229
DDB_G0268516	149	99	144	130	124	164
DDB_G0268518	16	0	10	11	26	35
DDB_G0268520	62	65	68	55	73	73
DDB_G0268522	279	111	161	87	54	42
DDB_G0268524	28	23	17	18	13	7
DDB_G0268526	189	132	141	130	142	118
DDB_G0268528	32	32	23	36	20	39
DDB_G0268534	225	191	215	184	127	195
DDB_G0268536	74	47	45	21	16	18
DDB_G0268538	735	710	697	936	870	846
DDB_G0268540	6	0	4	0	1	0
DDB_G0268542	0	1	0	2	0	0
DDB_G0268544	3	0	2	0	0	2
DDB_G0268546	18	4	6	10	4	4
DDB_G0268548	238	198	215	163	167	142
DDB_G0268550	0	5	0	0	0	0
DDB_G0268552	36	19	34	30	23	24
DDB_G0268554	71	58	78	67	57	42
DDB_G0268556	511	463	452	448	380	508
DDB_G0268558	79	66	35	61	44	59
DDB_G0268560	60	35	39	31	48	71
DDB_G0268562	0	0	0	0	0	0
DDB_G0268564	39	56	30	35	27	25
DDB_G0268566	14	16	20	12	11	20
DDB_G0268568	0	0	0	0	0	0
DDB_G0268570	4	6	3	12	1	2
DDB_G0268572	0	0	0	2	0	0
DDB_G0268574	472	415	435	383	459	422
DDB_G0268576	189	135	172	109	92	138
DDB_G0268578	947	844	650	655	651	585
DDB_G0268580	132	106	98	88	98	84
DDB_G0268582	45	56	36	33	50	35
DDB_G0268584	0	0	0	0	0	0
DDB_G0268586	39	29	59	28	32	42
DDB_G0268588	32	31	44	21	21	27
DDB_G0268590	517	520	425	475	465	413
DDB_G0268592	865	787	652	808	808	930
DDB_G0268594	10	12	0	14	5	8
DDB_G0268596	1	4	2	0	2	1
DDB_G0268598	2	2	1	2	0	1
DDB_G0268600	1796	1623	1366	1942	2180	2348
DDB_G0268602	0	0	0	0	0	0
DDB_G0268604	0	0	0	0	0	0
DDB_G0268606	758	709	721	394	445	377
DDB_G0268608	18	19	19	25	11	31
DDB_G0268610	6	10	3	4	2	2
DDB_G0268612	0	0	0	0	0	0
DDB_G0268614	1382	1405	1201	1245	1271	1153
DDB_G0268616	1944	1736	1551	1642	1734	1655
DDB_G0268618	339	337	319	315	287	294
DDB_G0268620	619	671	621	551	620	584
DDB_G0268622	40	67	83	42	65	46
DDB_G0268624	33	24	20	27	31	24
DDB_G0268626	52	42	42	40	32	20
DDB_G0268628	21	15	9	12	17	15
DDB_G0268630	990	867	1002	866	794	1050
DDB_G0268632	27652	26303	23136	23561	25417	23975
DDB_G0268634	250	227	242	169	168	227
DDB_G0268636	300	248	290	247	241	262
DDB_G0268638	1038	1050	798	949	1017	918
DDB_G0268640	4	0	0	2	9	1
DDB_G0268642	178	136	133	198	203	214
DDB_G0268644	0	0	0	0	0	0
DDB_G0268646	5205	5316	4453	4357	4045	4544
DDB_G0268650	5703	5582	5053	5173	5620	5566
DDB_G0268652	253	214	171	217	175	238
DDB_G0268656	0	0	1	0	0	0
DDB_G0268660	611	593	450	499	503	520
DDB_G0268662	2595	2435	2260	1734	1827	1981
DDB_G0268664	3159	2758	2779	2508	2230	2509
DDB_G0268666	154	167	129	177	206	194
DDB_G0268668	42	37	40	48	27	41
DDB_G0268670	0	0	0	0	0	0
DDB_G0268672	0	0	0	0	0	0
DDB_G0268674	0	0	0	0	0	0
DDB_G0268676	0	0	0	0	0	0
DDB_G0268678	245	243	166	195	206	192
DDB_G0268680	155	159	132	141	151	103
DDB_G0268684	184	172	110	98	109	156
DDB_G0268686	47	26	50	9	11	25
DDB_G0268688	0	0	0	0	0	0
DDB_G0268690	0	0	0	0	0	0
DDB_G0268692	0	0	0	0	0	0
DDB_G0268694	0	0	0	0	0	0
DDB_G0268696	92	101	105	94	79	107
DDB_G0268698	185	181	195	231	269	281
DDB_G0268702	1315	1227	1071	1314	1367	1398
DDB_G0268704	204	195	159	175	182	150
DDB_G0268706	3576	3490	2971	2628	2825	2837
DDB_G0268708	28	22	18	43	29	30
DDB_G0268710	1467	1396	1208	887	1000	972
DDB_G0268712	0	0	0	0	1	0
DDB_G0268714	10	21	22	24	20	25
DDB_G0268716	2	0	0	5	0	0
DDB_G0268718	225	200	237	215	195	243
DDB_G0268720	963	829	800	950	724	940
DDB_G0268724	5	6	3	3	2	0
DDB_G0268726	0	0	0	0	0	0
DDB_G0268730	0	0	0	0	0	0
DDB_G0268732	3	2	0	2	6	5
DDB_G0268734	0	0	0	0	0	3
DDB_G0268738	0	0	6	0	1	2
DDB_G0268740	0	1	3	2	0	4
DDB_G0268742	46	39	21	36	30	35
DDB_G0268744	33	35	33	22	38	21
DDB_G0268746	133	99	179	213	111	179
DDB_G0268748	0	0	0	0	0	0
DDB_G0268750	0	0	0	0	0	0
DDB_G0268752	0	0	0	0	0	0
DDB_G0268754	0	2	9	1	1	0
DDB_G0268756	0	0	0	1	0	0
DDB_G0268758	942	813	710	915	855	884
DDB_G0268760	47	55	82	52	37	78
DDB_G0268762	649	596	543	667	590	616
DDB_G0268764	1682	1490	1466	1323	1450	1431
DDB_G0268772	21	16	11	16	19	16
DDB_G0268774	20	1	13	5	21	15
DDB_G0268776	7	15	17	20	3	2
DDB_G0268778	551	444	415	464	528	477
DDB_G0268780	0	0	0	0	0	0
DDB_G0268782	5	16	7	15	2	0
DDB_G0268784	0	1	1	1	0	0
DDB_G0268786	86	43	74	45	44	80
DDB_G0268788	1	4	7	0	0	0
DDB_G0268790	1627	1450	1525	1223	1212	1335
DDB_G0268792	782	691	693	495	472	526
DDB_G0268794	100	101	83	91	60	88
DDB_G0268796	20	11	12	4	21	36
DDB_G0268798	3	3	0	0	0	0
DDB_G0268800	0	0	0	0	0	0
DDB_G0268802	19	17	17	13	6	7
DDB_G0268806	0	0	0	0	0	0
DDB_G0268808	54	37	49	40	21	22
DDB_G0268810	992	897	935	1006	1061	892
DDB_G0268812	4	5	5	0	0	0
DDB_G0268814	388	224	217	162	185	182
DDB_G0268816	108	112	126	73	81	59
DDB_G0268818	136	138	175	181	117	110
DDB_G0268820	20	21	6	15	10	6
DDB_G0268822	565	410	437	472	493	541
DDB_G0268824	48	50	44	74	36	59
DDB_G0268826	150	106	117	112	81	75
DDB_G0268828	1753	1380	1448	1456	1068	1656
DDB_G0268830	1	1	0	0	0	0
DDB_G0268832	0	2	3	3	0	4
DDB_G0268834	0	0	0	0	0	0
DDB_G0268836	3	3	3	0	1	6
DDB_G0268838	4	0	0	0	6	11
DDB_G0268840	0	0	0	0	0	0
DDB_G0268842	0	0	0	0	0	0
DDB_G0268844	0	0	1	2	2	1
DDB_G0268846	114	42	27	73	48	49
DDB_G0268848	5802	5052	4890	5014	4960	5066
DDB_G0268850	1462	1229	1180	1554	1529	1520
DDB_G0268852	1751	1465	1454	1722	1739	1775
DDB_G0268854	19	23	37	35	50	41
DDB_G0268856	0	0	0	0	0	1
DDB_G0268858	0	0	1	0	2	0
DDB_G0268860	486	393	496	381	346	400
DDB_G0268862	493	461	619	305	359	354
DDB_G0268864	84	82	64	56	61	55
DDB_G0268866	0	0	3	0	0	4
DDB_G0268868	240	242	219	256	324	263
DDB_G0268870	350	303	308	338	383	324
DDB_G0268872	3379	3225	2818	2458	2691	2791
DDB_G0268874	651	518	489	911	802	989
DDB_G0268876	548	536	542	456	460	367
DDB_G0268878	4500	4532	4483	2813	2901	3157
DDB_G0268880	23	15	8	40	8	12
DDB_G0268882	1	1	0	0	0	0
DDB_G0268884	4	2	12	13	18	7
DDB_G0268886	4162	3453	3358	3627	4234	3793
DDB_G0268888	1078	1089	948	990	1120	1046
DDB_G0268890	29	27	38	27	22	35
DDB_G0268892	719	668	584	480	393	572
DDB_G0268894	3	2	2	1	1	0
DDB_G0268896	0	0	0	0	0	0
DDB_G0268898	966	742	767	744	662	760
DDB_G0268900	4	5	2	0	0	0
DDB_G0268902	111	100	86	94	100	90
DDB_G0268904	182	122	150	110	142	104
DDB_G0268906	0	0	0	0	0	0
DDB_G0268908	0	0	0	0	0	0
DDB_G0268910	1	1	0	0	0	0
DDB_G0268914	3107	3128	2559	2213	2497	2400
DDB_G0268916	11	3	9	18	7	10
DDB_G0268918	2	0	0	0	0	0
DDB_G0268920	2423	2313	2103	1583	1603	1655
DDB_G0268922	1641	1650	1427	1265	1346	1257
DDB_G0268924	2303	2150	1895	1613	1595	1733
DDB_G0268926	0	0	0	0	0	0
DDB_G0268928	660	568	469	399	485	475
DDB_G0268930	0	0	0	0	0	0
DDB_G0268932	0	0	0	0	0	0
DDB_G0268934	12	8	15	22	15	9
DDB_G0268938	43	26	73	26	56	37
DDB_G0268942	13	9	1	5	2	3
DDB_G0268944	19	14	14	8	16	13
DDB_G0268946	4	3	8	0	8	2
DDB_G0268948	1170	1120	1120	659	718	645
DDB_G0268950	0	3	0	3	0	1
DDB_G0268958	133	143	103	122	121	132
DDB_G0268960	26	70	42	41	36	34
DDB_G0268962	7	4	2	1	1	6
DDB_G0268964	11	6	21	4	8	12
DDB_G0268966	135	170	131	140	118	125
DDB_G0268968	298	302	330	317	374	307
DDB_G0268970	76	125	116	79	56	92
DDB_G0268974	0	0	0	0	0	0
DDB_G0268978	2	1	1	0	0	0
DDB_G0268980	0	0	0	0	0	0
DDB_G0268982	123	142	118	115	96	120
DDB_G0268984	6	0	2	7	14	11
DDB_G0268986	4	9	2	2	7	7
DDB_G0268988	42	46	35	24	38	18
DDB_G0268990	45	49	31	38	44	50
DDB_G0268992	4	4	5	2	0	5
DDB_G0268994	26	35	36	27	25	27
DDB_G0268996	111	98	102	107	57	103
DDB_G0269000	159	138	130	120	124	191
DDB_G0269004	26	3	6	11	20	7
DDB_G0269006	1099	996	949	862	936	899
DDB_G0269008	1	0	0	0	0	0
DDB_G0269010	0	0	1	0	0	0
DDB_G0269012	0	0	1	1	0	5
DDB_G0269014	10282	9693	8234	8400	8957	8079
DDB_G0269016	6625	6077	6516	4151	4621	4400
DDB_G0269018	3	12	6	4	9	11
DDB_G0269020	0	0	0	0	0	0
DDB_G0269022	148	132	93	87	152	101
DDB_G0269024	51	38	63	77	45	68
DDB_G0269026	1	2	6	0	1	0
DDB_G0269028	0	0	0	0	0	0
DDB_G0269030	3	6	1	1	0	1
DDB_G0269032	463	371	367	414	395	421
DDB_G0269034	184	194	149	144	118	149
DDB_G0269036	7	16	8	5	4	6
DDB_G0269038	1802	1555	1554	1474	1182	1484
DDB_G0269040	756	721	650	374	356	379
DDB_G0269042	0	0	0	0	0	0
DDB_G0269044	8	2	6	0	16	0
DDB_G0269046	1638	1300	1240	1394	1513	1470
DDB_G0269048	1056	834	764	1090	1186	1118
DDB_G0269050	224	286	244	198	236	188
DDB_G0269052	56	76	46	45	70	47
DDB_G0269054	142	88	120	71	113	158
DDB_G0269056	806	776	728	543	572	584
DDB_G0269058	874	801	701	483	531	501
DDB_G0269060	189	108	144	72	39	57
DDB_G0269062	70	44	79	80	76	74
DDB_G0269064	3	1	0	1	1	0
DDB_G0269066	0	0	0	0	0	0
DDB_G0269068	5	3	4	0	1	2
DDB_G0269070	133	101	96	112	96	114
DDB_G0269072	9	9	12	2	10	3
DDB_G0269074	0	0	0	1	0	2
DDB_G0269076	1032	1017	875	519	563	560
DDB_G0269078	0	0	0	0	0	0
DDB_G0269080	8	0	3	0	2	0
DDB_G0269082	0	0	0	0	0	0
DDB_G0269084	12	6	8	2	5	2
DDB_G0269086	2301	2397	2248	2203	2249	1973
DDB_G0269088	5	6	10	3	4	4
DDB_G0269090	0	0	0	0	0	0
DDB_G0269092	12	11	18	8	9	3
DDB_G0269094	1136	1035	912	528	529	620
DDB_G0269096	9	0	0	0	0	0
DDB_G0269100	18852	17267	16844	15962	16294	15734
DDB_G0269102	1315	1236	1100	1322	1221	1193
DDB_G0269104	94	78	86	65	87	107
DDB_G0269106	200	184	141	148	126	109
DDB_G0269108	3	2	0	4	0	3
DDB_G0269110	292	184	218	197	212	209
DDB_G0269112	439	480	434	1512	1587	1504
DDB_G0269114	930	975	910	515	677	622
DDB_G0269116	0	0	6	3	0	0
DDB_G0269118	1997	1535	1695	2001	1598	1934
DDB_G0269120	1299	1263	1379	1400	1110	1330
DDB_G0269122	4246	4150	3908	4068	4063	4070
DDB_G0269124	7	13	15	7	24	39
DDB_G0269126	189	242	227	258	190	183
DDB_G0269128	0	0	0	0	0	0
DDB_G0269130	263	254	231	204	299	246
DDB_G0269132	47	62	56	29	67	25
DDB_G0269134	194033	184064	171605	172534	164510	173917
DDB_G0269136	83526	79158	74155	75240	72937	76629
DDB_G0269138	21535	20772	19495	19855	18309	17604
DDB_G0269140	1387	1253	1178	1073	918	1121
DDB_G0269142	1511	1307	1411	1270	1235	1035
DDB_G0269144	10082	9554	8794	9072	9446	8667
DDB_G0269146	21643	20643	18513	16533	16860	16262
DDB_G0269148	1102	1167	1021	1198	1225	1187
DDB_G0269150	1928	1918	1699	1579	1756	1765
DDB_G0269152	214	160	162	152	163	147
DDB_G0269154	1239	1082	1001	1190	1071	1085
DDB_G0269156	10844	10843	9681	10668	10925	10832
DDB_G0269158	3133	3136	2778	2174	2724	2482
DDB_G0269160	47478	48391	41274	44132	43473	47409
DDB_G0269162	636	549	561	551	690	667
DDB_G0269164	1011	940	970	362	383	429
DDB_G0269166	1370	1145	1128	1088	1215	1242
DDB_G0269168	2112	1927	1804	1608	1789	1744
DDB_G0269170	146	112	163	105	63	102
DDB_G0269172	849	815	700	473	610	556
DDB_G0269174	639	593	502	622	713	604
DDB_G0269176	5	1	3	0	0	0
DDB_G0269178	0	0	1	0	0	0
DDB_G0269180	143	158	138	115	176	136
DDB_G0269182	306	246	262	170	227	177
DDB_G0269184	154	148	131	112	113	154
DDB_G0269186	648	629	548	472	594	433
DDB_G0269188	1030	918	815	770	870	818
DDB_G0269190	389	523	507	386	404	410
DDB_G0269192	217	181	176	147	138	161
DDB_G0269194	9148	9113	8178	6762	6978	7103
DDB_G0269196	4338	4483	4286	4018	4249	3943
DDB_G0269198	16948	16015	13711	12374	12619	12832
DDB_G0269200	1672	1634	1344	1447	1562	1510
DDB_G0269202	1028	1043	934	559	611	526
DDB_G0269204	409	408	389	283	252	308
DDB_G0269206	215	254	209	85	129	98
DDB_G0269208	115	73	52	27	50	40
DDB_G0269210	282	259	259	276	267	235
DDB_G0269212	789	764	741	752	716	716
DDB_G0269214	794	634	615	633	654	641
DDB_G0269216	94	72	41	40	55	58
DDB_G0269218	334	271	255	212	220	255
DDB_G0269220	190	167	131	126	101	143
DDB_G0269222	179	209	198	162	181	170
DDB_G0269224	111	55	75	53	69	60
DDB_G0269226	1003	951	906	837	826	895
DDB_G0269228	9	9	15	6	16	13
DDB_G0269230	609	593	509	420	571	496
DDB_G0269232	367	394	408	316	340	355
DDB_G0269234	56695	50805	49714	47555	44204	46300
DDB_G0269236	171	217	205	209	183	159
DDB_G0269238	1317	1196	1250	1170	1368	1190
DDB_G0269240	116	137	136	113	133	101
DDB_G0269242	3661	3786	3155	3093	3105	3146
DDB_G0269244	112	95	112	102	96	121
DDB_G0269246	801	650	730	634	658	654
DDB_G0269248	198	164	127	137	163	117
DDB_G0269250	1789	1531	1509	1493	1467	1523
DDB_G0269252	1340	1355	1254	1167	1304	1182
DDB_G0269254	63	39	26	111	102	69
DDB_G0269256	179	165	144	76	94	128
DDB_G0269258	42	48	33	30	42	62
DDB_G0269260	72	90	78	38	38	48
DDB_G0269262	96	57	47	66	62	57
DDB_G0269264	21	20	21	42	30	45
DDB_G0269266	91	64	59	38	52	45
DDB_G0269268	10	18	13	6	18	20
DDB_G0269270	107	123	99	52	80	71
DDB_G0269272	195	160	149	108	130	128
DDB_G0269274	307	277	249	229	154	190
DDB_G0269276	26	16	15	6	8	19
DDB_G0269278	8	4	0	6	5	0
DDB_G0269280	11	9	0	17	22	14
DDB_G0269282	96	111	121	157	148	135
DDB_G0269284	224	271	171	198	195	304
DDB_G0269286	489	353	370	322	391	353
DDB_G0269288	3344	3182	2581	2612	2971	2604
DDB_G0269290	7011	6440	6325	6135	5871	6445
DDB_G0269292	1545	1359	1303	1419	1004	1406
DDB_G0269294	196	181	192	184	162	257
DDB_G0269296	18	19	10	17	7	8
DDB_G0269298	736	712	510	547	644	575
DDB_G0269300	170	124	151	142	171	131
DDB_G0269302	6	8	6	5	10	5
DDB_G0269304	42	40	47	65	38	46
DDB_G0269306	53	24	38	22	36	32
DDB_G0269308	0	0	0	0	0	0
DDB_G0269312	492	484	402	456	512	479
DDB_G0269318	0	0	0	0	0	0
DDB_G0269320	1	4	3	4	8	3
DDB_G0269322	92	66	81	66	51	92
DDB_G0269324	0	1	3	0	0	0
DDB_G0269326	343	252	249	256	256	261
DDB_G0269328	72	54	55	60	22	85
DDB_G0269330	1	0	0	4	2	0
DDB_G0269332	424	501	393	443	483	535
DDB_G0269334	3370	3828	3158	3342	3560	3667
DDB_G0269336	287	280	211	229	166	261
DDB_G0269338	33	45	66	50	36	35
DDB_G0269340	247	185	205	125	141	191
DDB_G0269342	194	170	220	89	30	59
DDB_G0269344	86	130	105	71	113	97
DDB_G0269346	0	0	0	0	0	0
DDB_G0269348	93	104	122	90	101	82
DDB_G0269350	9	19	12	5	3	8
DDB_G0269352	174	78	127	130	96	127
DDB_G0269354	192	161	213	177	157	188
DDB_G0269356	12	10	26	21	15	9
DDB_G0269358	110	66	91	119	74	80
DDB_G0269360	26	17	21	11	20	21
DDB_G0269362	735	674	570	567	579	544
DDB_G0269364	1051	885	723	344	347	377
DDB_G0269368	26	16	20	24	19	14
DDB_G0269370	104	110	103	122	76	134
DDB_G0269372	918	837	892	839	693	825
DDB_G0269374	105	107	88	139	78	93
DDB_G0269376	46	42	38	31	21	27
DDB_G0269378	1544	1645	1421	1246	1293	1384
DDB_G0269380	1165	1161	1179	988	1257	1027
DDB_G0269382	2316	2313	2033	1759	1750	1755
DDB_G0269384	0	2	4	0	0	9
DDB_G0269386	4	0	4	1	0	0
DDB_G0269388	590	547	513	46	35	44
DDB_G0269390	0	0	0	0	0	0
DDB_G0269392	24	9	15	3	9	11
DDB_G0269394	98	82	61	64	44	59
DDB_G0269398	22	20	30	19	27	21
DDB_G0269400	132	115	97	108	101	67
DDB_G0269402	3	3	2	0	0	1
DDB_G0269404	32	47	32	19	27	21
DDB_G0269406	1161	1141	957	858	782	912
DDB_G0269408	9	16	7	7	14	12
DDB_G0269410	1911	2136	1984	1921	2188	2047
DDB_G0269412	571	360	392	298	313	350
DDB_G0269414	638	495	531	354	345	429
DDB_G0269416	57	64	37	58	49	75
DDB_G0269418	36	48	52	18	21	65
DDB_G0269420	2	10	9	15	7	11
DDB_G0269422	0	0	0	0	1	0
DDB_G0269424	142	143	180	107	117	116
DDB_G0269426	861	940	784	747	771	702
DDB_G0269428	0	0	0	0	0	0
DDB_G0269430	590	604	476	514	543	511
DDB_G0269432	458	460	377	538	462	414
DDB_G0269434	0	0	0	0	0	0
DDB_G0269436	0	0	3	1	1	1
DDB_G0269438	333	322	332	368	456	405
DDB_G0269440	437	481	319	329	400	301
DDB_G0269442	70	50	51	77	55	44
DDB_G0269444	304	319	345	306	284	278
DDB_G0269446	0	2	5	0	0	0
DDB_G0269448	451	412	478	437	291	369
DDB_G0269450	22	12	23	21	14	18
DDB_G0269452	37	30	17	50	25	7
DDB_G0269454	211	224	233	255	243	222
DDB_G0269456	0	0	0	0	0	0
DDB_G0269458	1077	1147	1125	1457	1469	1318
DDB_G0269460	5474	5176	4878	4029	4248	3978
DDB_G0269462	3021	2637	2444	3025	3252	3009
DDB_G0269464	119	77	110	90	61	72
DDB_G0269466	298	324	253	212	294	193
DDB_G0269468	0	1	0	0	0	0
DDB_G0269470	72	63	80	64	34	32
DDB_G0269472	128	150	119	149	168	219
DDB_G0269474	719	803	735	586	431	514
DDB_G0269476	0	7	0	5	2	3
DDB_G0269478	0	0	0	0	0	0
DDB_G0269480	0	0	0	0	0	0
DDB_G0269482	6318	5759	5072	5761	6010	5810
DDB_G0269484	0	0	0	0	0	0
DDB_G0269486	375	341	275	349	260	293
DDB_G0269488	232	236	216	195	177	210
DDB_G0269492	0	0	0	0	0	0
DDB_G0269494	0	1	0	0	0	2
DDB_G0269496	789	713	601	462	422	363
DDB_G0269498	0	0	0	1	0	0
DDB_G0269500	31	41	44	45	31	41
DDB_G0269502	215	166	149	116	138	111
DDB_G0269504	8	15	3	2	2	3
DDB_G0269506	3	7	0	6	0	0
DDB_G0269508	2	3	2	4	0	1
DDB_G0269510	2475	2263	2192	2090	1929	2346
DDB_G0269512	349	222	264	231	200	163
DDB_G0269514	124	107	86	155	65	124
DDB_G0269516	0	0	0	0	0	1
DDB_G0269518	6770	6083	6301	6180	4608	5464
DDB_G0269520	1712	1628	1748	1719	1569	1711
DDB_G0269522	228	254	240	166	188	173
DDB_G0269526	78	66	54	102	140	116
DDB_G0269528	0	1	9	9	5	4
DDB_G0269530	9	0	9	0	1	0
DDB_G0269532	134	138	123	66	61	74
DDB_G0269534	8	4	0	4	0	5
DDB_G0269536	8	10	4	1	3	0
DDB_G0269538	2	0	3	3	7	8
DDB_G0269540	3	5	2	0	4	0
DDB_G0269542	17	18	7	9	14	14
DDB_G0269544	29	27	39	25	20	27
DDB_G0269546	593	542	571	427	392	429
DDB_G0269548	47	36	92	71	40	50
DDB_G0269550	78	67	52	74	74	90
DDB_G0269552	117	97	118	75	78	82
DDB_G0269554	672	588	631	498	523	499
DDB_G0269556	2413	2183	2048	2082	1992	2212
DDB_G0269558	0	0	2	0	0	5
DDB_G0269560	20	21	12	20	6	4
DDB_G0269562	5	6	10	12	0	0
DDB_G0269564	25	26	27	6	11	14
DDB_G0269566	0	0	2	0	0	0
DDB_G0269568	207	125	209	153	102	184
DDB_G0269570	135	87	105	131	87	119
DDB_G0269572	97	55	68	67	53	46
DDB_G0269574	39	12	55	32	30	28
DDB_G0269576	228	146	127	173	97	194
DDB_G0269578	0	1	0	0	0	0
DDB_G0269580	47	75	109	57	66	71
DDB_G0269582	812	876	699	646	757	748
DDB_G0269584	43	9	11	30	28	23
DDB_G0269586	3	0	0	0	0	0
DDB_G0269588	753	476	462	426	360	377
DDB_G0269590	185	189	136	127	159	188
DDB_G0269592	59	36	75	68	48	56
DDB_G0269594	323	313	264	378	361	318
DDB_G0269596	3	1	1	11	0	3
DDB_G0269598	2	0	0	0	0	0
DDB_G0269600	15	4	28	14	10	26
DDB_G0269602	49	61	58	51	68	68
DDB_G0269604	0	0	0	0	0	0
DDB_G0269606	11	0	4	0	2	2
DDB_G0269608	299	281	341	213	171	191
DDB_G0269610	13838	12640	11554	9920	10717	10490
DDB_G0269614	8434	8800	7277	7169	7509	7096
DDB_G0269616	25	31	34	28	38	40
DDB_G0269618	0	3	0	0	0	0
DDB_G0269620	8	1	6	0	2	0
DDB_G0269622	0	0	1	1	1	3
DDB_G0269624	1484	1493	1312	1353	1632	1525
DDB_G0269626	2791	2494	2281	1751	1985	1892
DDB_G0269628	1330	1256	1300	1556	1614	1544
DDB_G0269630	718	592	570	617	634	705
DDB_G0269632	1637	1688	1546	1339	1426	1505
DDB_G0269634	0	0	0	0	0	2
DDB_G0269636	804	737	704	816	890	877
DDB_G0269638	374	416	403	451	436	399
DDB_G0269640	722	524	525	568	517	545
DDB_G0269642	418	426	491	485	476	439
DDB_G0269644	103	91	102	44	51	61
DDB_G0269646	84	68	46	85	35	76
DDB_G0269648	0	0	4	10	3	10
DDB_G0269650	0	0	0	0	2	0
DDB_G0269652	38	14	14	11	34	31
DDB_G0269654	0	0	0	0	0	0
DDB_G0269656	2	14	3	3	3	6
DDB_G0269658	4	3	13	5	5	14
DDB_G0269662	6	6	14	3	3	6
DDB_G0269664	2063	2034	1859	1568	1563	1640
DDB_G0269666	0	0	1	0	0	0
DDB_G0269668	482	360	385	251	298	300
DDB_G0269670	11508	11100	10154	8687	9093	8965
DDB_G0269672	2	2	0	0	0	0
DDB_G0269674	0	0	0	0	0	0
DDB_G0269676	36	36	11	27	16	26
DDB_G0269678	136	158	121	177	148	151
DDB_G0269680	125	196	191	98	131	196
DDB_G0269682	12944	12028	10805	9770	10121	10516
DDB_G0269684	197	146	156	183	221	145
DDB_G0269686	505	613	520	425	480	474
DDB_G0269688	615	431	514	480	441	538
DDB_G0269692	169	104	46	110	142	120
DDB_G0269694	1301	1128	1205	871	984	923
DDB_G0269696	995	838	706	696	644	650
DDB_G0269698	10	1	4	0	0	1
DDB_G0269700	98	83	82	82	115	107
DDB_G0269702	0	3	0	2	1	0
DDB_G0269704	152	93	147	137	156	122
DDB_G0269706	74	50	55	52	32	34
DDB_G0269708	9290	9410	8664	7418	7255	7342
DDB_G0269710	1559	1573	1407	1351	1332	1299
DDB_G0269712	2228	2117	1860	2208	2180	2221
DDB_G0269714	162	144	143	213	294	213
DDB_G0269716	804	674	614	686	656	746
DDB_G0269718	1949	1676	1535	1213	1375	1465
DDB_G0269720	12	17	25	31	27	25
DDB_G0269722	175	188	197	227	169	231
DDB_G0269724	196	145	224	123	135	139
DDB_G0269726	118	75	78	74	64	46
DDB_G0269728	159	142	192	126	128	137
DDB_G0269730	2	0	0	0	0	0
DDB_G0269732	2468	2299	1906	1899	1897	2021
DDB_G0269734	2	5	5	0	1	2
DDB_G0269736	36	45	44	46	42	30
DDB_G0269738	247	220	268	260	300	248
DDB_G0269740	606	572	605	569	595	553
DDB_G0269742	388	325	309	369	426	455
DDB_G0269744	349	333	314	249	328	240
DDB_G0269746	32	29	14	36	20	19
DDB_G0269748	8	2	7	3	12	4
DDB_G0269750	283	304	223	229	237	199
DDB_G0269752	6	0	0	1	2	2
DDB_G0269754	11	6	7	0	10	4
DDB_G0269756	422	332	355	314	333	309
DDB_G0269758	0	0	7	0	0	2
DDB_G0269760	637	630	556	726	634	779
DDB_G0269762	1004	764	733	711	855	790
DDB_G0269764	62	75	89	64	154	121
DDB_G0269766	76	48	64	48	45	75
DDB_G0269768	6388	5403	5136	4668	4137	4953
DDB_G0269770	324	304	213	314	381	422
DDB_G0269772	62	58	72	71	109	100
DDB_G0269774	0	5	0	0	3	0
DDB_G0269776	96	83	127	108	98	114
DDB_G0269778	156	107	122	107	134	101
DDB_G0269780	357	362	345	296	208	305
DDB_G0269782	49	50	66	46	18	64
DDB_G0269784	22	26	19	30	44	21
DDB_G0269786	579	597	514	512	529	531
DDB_G0269788	135	125	114	85	86	66
DDB_G0269790	2166	1965	1762	1845	1738	1924
DDB_G0269794	0	0	0	0	0	0
DDB_G0269796	0	0	0	0	0	0
DDB_G0269800	235	144	169	156	146	179
DDB_G0269802	21	18	12	10	17	16
DDB_G0269804	53	37	22	23	30	47
DDB_G0269806	5	0	0	0	0	0
DDB_G0269808	0	3	0	0	0	0
DDB_G0269812	34	12	32	17	14	23
DDB_G0269814	219	226	208	244	257	179
DDB_G0269816	370	281	264	307	225	288
DDB_G0269818	2	0	1	0	4	0
DDB_G0269820	0	6	2	0	0	0
DDB_G0269822	64	41	81	85	68	57
DDB_G0269824	50	79	74	50	76	51
DDB_G0269826	0	2	0	0	4	0
DDB_G0269828	570	559	578	510	476	505
DDB_G0269830	224	201	220	197	202	213
DDB_G0269832	52	62	64	64	57	53
DDB_G0269834	51	50	82	54	45	60
DDB_G0269836	0	0	1	3	5	0
DDB_G0269838	182	85	111	83	83	91
DDB_G0269840	170	152	129	107	114	112
DDB_G0269842	6940	7217	6950	4245	4830	4743
DDB_G0269844	0	0	0	0	0	0
DDB_G0269846	9	0	3	6	4	19
DDB_G0269848	155	117	165	221	225	246
DDB_G0269850	2314	2212	1844	1761	1731	1805
DDB_G0269852	0	1	0	2	0	0
DDB_G0269854	304	229	213	226	207	172
DDB_G0269856	36	11	16	18	30	24
DDB_G0269858	0	0	0	0	0	0
DDB_G0269860	229	255	200	252	233	265
DDB_G0269864	276	254	202	246	287	261
DDB_G0269866	0	0	0	0	0	0
DDB_G0269870	0	0	0	0	0	0
DDB_G0269872	5	0	0	0	4	0
DDB_G0269874	197	151	152	141	178	141
DDB_G0269876	52	60	74	40	54	52
DDB_G0269878	1756	1666	1527	1590	1610	1610
DDB_G0269880	8	8	3	4	7	12
DDB_G0269882	0	0	0	5	0	0
DDB_G0269884	177	158	127	154	121	136
DDB_G0269886	2	1	4	1	2	0
DDB_G0269888	0	3	1	0	0	0
DDB_G0269890	151	129	158	179	136	196
DDB_G0269892	333	273	268	270	326	235
DDB_G0269894	50	52	38	56	48	78
DDB_G0269896	33	43	29	35	66	27
DDB_G0269898	736	530	551	494	552	505
DDB_G0269900	0	0	0	0	0	2
DDB_G0269902	0	5	14	26	49	54
DDB_G0269904	0	0	0	0	0	0
DDB_G0269906	357	327	271	300	224	149
DDB_G0269908	119	108	145	131	143	173
DDB_G0269910	1741	1821	1900	1748	1836	1795
DDB_G0269912	1184	1291	1128	988	1050	945
DDB_G0269914	24	21	26	18	8	23
DDB_G0269916	32443	32240	30286	27972	30317	29795
DDB_G0269918	285	229	280	266	201	261
DDB_G0269920	5	11	15	7	5	12
DDB_G0269922	530	508	477	397	429	450
DDB_G0269924	1406	1359	1153	1123	1132	1233
DDB_G0269926	1946	1998	1684	1541	1538	1647
DDB_G0269928	2	3	5	5	0	0
DDB_G0269930	0	11	0	5	2	4
DDB_G0269932	1072	1198	1009	809	910	845
DDB_G0269934	17856	16788	14622	10642	11432	10642
DDB_G0269936	22	4	17	24	18	8
DDB_G0269938	0	2	2	0	1	0
DDB_G0269940	0	0	0	0	3	5
DDB_G0269942	26	8	29	45	37	30
DDB_G0269944	2	0	0	3	0	0
DDB_G0269946	383	365	387	357	280	318
DDB_G0269948	902	877	722	714	854	774
DDB_G0269950	331	320	394	307	240	309
DDB_G0269952	23	56	38	43	42	42
DDB_G0269954	0	5	0	5	0	1
DDB_G0269956	27	25	28	40	39	39
DDB_G0269958	16	24	20	7	7	14
DDB_G0269960	0	0	0	0	0	0
DDB_G0269962	550	487	464	408	397	498
DDB_G0269964	42	68	46	53	38	61
DDB_G0269966	272	224	222	313	235	334
DDB_G0269968	106	100	118	134	144	137
DDB_G0269970	5	16	3	11	8	7
DDB_G0269972	503	472	474	418	386	553
DDB_G0269974	5	4	7	3	3	6
DDB_G0269976	201	168	143	138	142	181
DDB_G0269978	0	5	0	0	4	0
DDB_G0269980	618	558	546	509	461	550
DDB_G0269982	259	294	235	194	217	232
DDB_G0269984	0	0	0	0	0	0
DDB_G0269986	181	82	83	138	130	98
DDB_G0269988	9	16	9	3	4	9
DDB_G0269990	78	61	68	36	23	28
DDB_G0269992	332	399	308	333	436	284
DDB_G0269994	426	416	466	457	427	478
DDB_G0269996	431	393	378	331	351	430
DDB_G0269998	0	3	10	0	5	2
DDB_G0270000	4	9	6	6	5	0
DDB_G0270002	3	0	6	10	2	5
DDB_G0270004	0	0	0	0	0	0
DDB_G0270006	395	326	330	409	434	515
DDB_G0270008	1927	2162	2107	2791	2696	2869
DDB_G0270010	0	0	0	0	0	0
DDB_G0270012	407	497	448	614	525	580
DDB_G0270014	25	34	49	8	30	18
DDB_G0270016	0	2	19	2	0	0
DDB_G0270018	171	112	194	154	144	118
DDB_G0270020	45	25	10	28	40	39
DDB_G0270022	52	65	52	73	66	43
DDB_G0270024	2606	2366	2015	1747	1789	1779
DDB_G0270026	265	244	231	280	278	234
DDB_G0270028	255	236	218	331	262	238
DDB_G0270030	34	25	50	34	43	42
DDB_G0270032	29	29	44	31	34	21
DDB_G0270034	2404	2226	2071	1903	1988	2108
DDB_G0270036	76	98	102	101	92	106
DDB_G0270038	57	36	47	20	20	40
DDB_G0270040	129	113	85	110	81	116
DDB_G0270042	1621	1370	1309	1162	1272	1039
DDB_G0270044	807	697	608	628	550	658
DDB_G0270046	90	84	68	75	98	75
DDB_G0270048	2	5	26	3	6	10
DDB_G0270050	12	5	0	4	4	7
DDB_G0270052	53	23	31	31	16	16
DDB_G0270054	7	3	0	3	0	0
DDB_G0270056	1163	1010	768	716	809	838
DDB_G0270058	85	50	71	205	227	207
[truncated: 12,027 more rows]

## Sheet: DEG
baseMean	log2FoldChange	lfcSE	pvalue	padj	gene	gene_name
26.5641	0.533894	0.545798	0.00330341	0.0421479	DDB0237401	DDB0237401
21.1501	0.0166291	0.212684	0.793946	0.951138	DDB0237402	DDB0237402
8.72536	-0.0156791	0.245675	0.768913	NA	DDB0237418	DDB0237418
22.5362	0.11423	0.250347	0.162686	0.523785	DDB0237440	DDB0237440
7.12193	0.321408	0.625201	0.00379827	NA	DDB0237450	DDB0237450
22.9654	0.125149	0.265717	0.134098	0.477076	DDB0237452	DDB0237452
58.3776	0.0182011	0.162746	0.797391	0.952204	DDB0252685	DDB0252685
56.421	-0.0584824	0.181946	0.43282	0.802093	DDB0252727	DDB0252727
11.9196	-0.0953066	0.273255	0.187421	0.559717	DDB0266486	DDB0266486
109.751	0.0779063	0.147528	0.305373	0.703458	DDB0266711	DDB0266711
17.7261	0.0633101	0.236242	0.355012	0.74623	DDB0266768	DDB0266768
63.0063	-0.0459564	0.156077	0.530067	0.852336	DDB0302545	DDB0302545
11.1774	0.0456548	0.245185	0.453807	0.814384	DDB0305740	DDB0305740
85.7488	0.0131559	0.150807	0.852467	0.968892	DDB0305793	DDB0305793
8.36794	-0.0589749	0.268473	0.316317	NA	DDB0305816	DDB0305816
122.117	-0.0212054	0.142802	0.764305	0.943443	DDB0305904	DDB0305904
29.7434	-0.204369	0.309553	0.0484739	0.27634	DDB0308237	DDB0308237
26.5626	-0.176187	0.316764	0.0633146	0.327418	DDB0308504	DDB0308504
7.85494	0.08295	0.312213	0.143086	NA	DDB0308525	DDB0308525
10.0629	0.0437785	0.248378	0.461344	NA	DDB0309122	DDB0309122
23.4814	0.126571	0.296595	0.114489	0.444983	DDB0346591	DDB0346591
14.8771	-0.136456	0.293614	0.104716	0.428235	DDB0346788	DDB0346788
24.3887	0.0191984	0.188294	0.779737	0.946962	DDB0346890	DDB0346890
13.4318	0.120584	0.290524	0.126314	0.463421	DDB0347217	DDB0347217
29.4166	-0.00170607	0.180884	0.980241	0.994743	DDB0347227	DDB0347227
24.7698	0.0375642	0.196295	0.589863	0.879238	DDB0347647	DDB0347647
8.66768	-0.0588694	0.268314	0.317229	NA	DDB0347664	DDB0347664
47.2659	0.133398	0.24787	0.127053	0.463949	DDB0347838	DDB0347838
397.266	-0.0214446	0.127919	0.757041	0.942275	DDB0347863	DDB0347863
8.94382	-0.0150554	0.243032	0.781519	NA	DDB0347976	DDB0347976
89.1155	0.263611	0.290617	0.0252291	0.181322	DDB0348034	DDB0348034
74.6756	-0.0591099	0.167023	0.430515	0.801098	DDB0348061	DDB0348061
28.934	0.0139092	0.175038	0.842261	0.965873	DDB0348189	DDB0348189
16.9814	-0.124394	0.312081	0.105585	0.429454	DDB0348432	DDB0348432
7.50434	0.0858449	0.308244	0.149289	NA	DDB0348573	DDB0348573
204.983	0.0323565	0.125494	0.641318	0.902857	DDB0348597	DDB0348597
33.1465	-0.0896188	0.217512	0.252604	0.648452	DDB0348605	DDB0348605
16.8731	-0.110887	0.276392	0.152343	0.507182	DDB0348634	DDB0348634
11.8319	-0.036558	0.238209	0.544807	0.860478	DDB0348724	DDB0348724
9.76747	-0.0487286	0.249924	0.421166	NA	DDB0348973	DDB0348973
7.62991	0.164481	0.389763	0.0404621	NA	DDB0348985	DDB0348985
15.0568	-0.136223	0.308074	0.0972382	0.412059	DDB0349025	DDB0349025
11.5151	-0.0151721	0.220179	0.805455	0.954134	DDB0349112	DDB0349112
38.3488	0.0465079	0.181453	0.522446	0.847336	DDB0349113	DDB0349113
43.0058	-0.0682927	0.196369	0.364891	0.75313	DDB0349149	DDB0349149
43.1692	0.0299125	0.18256	0.671069	0.915764	DDB0349523	DDB0349523
55.2927	-0.34521	0.335204	0.011299	0.104959	DDB_G0267178	DDB_G0267178_RTE, products: DIRS1 ORF2 fragment
169.389	-0.0533209	0.122924	0.447885	0.810551	DDB_G0267180	DDB_G0267180_RTE, products: DIRS1 ORF1
93.5835	-1.05713	0.324581	5.18723e-06	0.0001751	DDB_G0267182	DDB_G0267182_RTE, products: DIRS1 ORF2 fragment
123.467	-0.206708	0.215551	0.0435754	0.260723	DDB_G0267184	DDB_G0267184_RTE, products: DIRS1 ORF2 fragment
38.1232	-0.00174658	0.164241	0.980187	0.994743	DDB_G0267186	DDB_G0267186_RTE, products: DIRS1 ORF1 fragment
85.7371	-0.0801501	0.167205	0.303882	0.702133	DDB_G0267188	DDB_G0267188_RTE, products: DIRS1 ORF2 fragment
38.5276	-0.0491863	0.178898	0.502096	0.835755	DDB_G0267206	DDB_G0267206_RTE, products: DIRS1 ORF2 fragment
78.2515	-0.174994	0.207591	0.0691904	0.342538	DDB_G0267208	DDB_G0267208_RTE, products: DIRS1 ORF1 fragment
246.251	-0.328633	0.19784	0.00487457	0.0567861	DDB_G0267210	DDB_G0267210_RTE, products: DIRS1 ORF2 fragment
1204.71	-0.08074	0.114113	0.250078	0.646314	DDB_G0267236	DDB_G0267236_RTE, products: DIRS1 ORF2 fragment
616.37	-0.151477	0.126245	0.0534662	0.292919	DDB_G0267238	DDB_G0267238_RTE, products: DIRS1 ORF1
175.276	-1.0245	0.238203	9.46076e-08	4.94613e-06	DDB_G0267240	DDB_G0267240_RTE, products: DIRS1 ORF2 fragment
194.866	-0.0920523	0.137868	0.225999	0.613394	DDB_G0267242	DDB_G0267242_RTE, products: DIRS1 ORF1 fragment
105.244	-0.391627	0.284458	0.00533088	0.0606998	DDB_G0267244	DDB_G0267244_RTE, products: DIRS1 ORF2 fragment
186.299	-0.0580806	0.125101	0.41304	0.78649	DDB_G0267246	DDB_G0267246_RTE, products: DIRS1 ORF1
15.7788	-0.563099	0.694546	0.00207477	0.029355	DDB_G0267250	DDB_G0267250_TE, products: DDT-B
183.437	-1.02804	0.234636	6.57551e-08	3.52365e-06	DDB_G0267258	DDB_G0267258_RTE, products: DIRS1 ORF2 fragment
196.712	-0.0764232	0.125747	0.291378	0.692291	DDB_G0267260	DDB_G0267260_RTE, products: DIRS1 ORF1
92.4984	-1.0516	0.355248	1.28901e-05	0.000401891	DDB_G0267262	DDB_G0267262_RTE, products: DIRS1 ORF2 fragment
94.4653	-0.148091	0.188565	0.100324	0.418376	DDB_G0267264	DDB_G0267264_RTE, products: DIRS1 ORF1 fragment
10.9777	-0.016085	0.221612	0.793041	0.950718	DDB_G0267270	DDB_G0267270_RTE, products: DIRS1 ORF1 fragment
18.8327	0.0507852	0.211114	0.467053	0.820848	DDB_G0267272	DDB_G0267272_RTE, products: DIRS1 ORF2 fragment
67.3312	-0.0376908	0.159313	0.602838	0.885968	DDB_G0267282	DDB_G0267282_RTE, products: DIRS1 ORF1 fragment
813.33	-0.135405	0.118999	0.0715537	0.350172	DDB_G0267292	DDB_G0267292_RTE, products: DIRS1 ORF1
504.169	-1.92745	0.173285	2.54712e-30	9.49521e-28	DDB_G0267294	DDB_G0267294_RTE, products: DIRS1 ORF2 fragment
223.27	-0.533395	0.198164	0.000154318	0.00338395	DDB_G0267300	DDB_G0267300_RTE, products: DIRS1 ORF1/ORF2 fusion fragment
158.941	-1.10507	0.246723	4.38417e-08	2.45686e-06	DDB_G0267304	DDB_G0267304_RTE, products: DIRS1 ORF3 fragment
216.357	1.67102	0.219093	8.83813e-16	1.6123e-13	DDB_G0267306	DDB_G0267306_RTE, products: Skipper GAG-PRO-POL
145.653	1.32559	0.253351	1.85735e-09	1.54611e-07	DDB_G0267308	DDB_G0267308_RTE, products: Skipper GAG-PRO
134.147	1.86985	0.289634	2.20547e-12	2.82234e-10	DDB_G0267310	DDB_G0267310_RTE, products: Skipper GAG-PRO
114.271	-0.015326	0.136879	0.82684	0.961528	DDB_G0267314	DDB_G0267314_RTE, products: DIRS1 ORF2/ORF3 fusion fragment
273.852	-0.160142	0.142263	0.0551863	0.298528	DDB_G0267324	DDB_G0267324_RTE, products: DIRS1 ORF1
158.472	-0.737894	0.254243	3.34642e-05	0.000913764	DDB_G0267326	DDB_G0267326_RTE, products: DIRS1 ORF2 fragment
199.818	-0.672263	0.243313	6.53132e-05	0.00164704	DDB_G0267328	DDB_G0267328_RTE, products: DIRS1 ORF2 fragment
159.38	-0.0786652	0.132803	0.287215	0.6877	DDB_G0267330	DDB_G0267330_RTE, products: DIRS1 ORF1
21.0397	-0.0670919	0.217743	0.355732	0.746792	DDB_G0267334	DDB_G0267334_RTE, products: DIRS1 ORF1 fragment
20.5461	-0.0841008	0.23929	0.256896	0.652437	DDB_G0267338	DDB_G0267338_RTE, products: DIRS1 ORF3
154.171	-1.03303	0.26767	6.07451e-07	2.50418e-05	DDB_G0267342	DDB_G0267342_RTE, products: DIRS1 ORF2 fragment
75.9152	0.0386353	0.170845	0.593189	0.881147	DDB_G0267354	DDB_G0267354_TE, products: DDT-A
624.204	1.53029	0.134358	2.62446e-31	1.12511e-28	DDB_G0267356	DDB_G0267356_RTE, products: Skipper GAG-PRO-POL
636.216	1.67069	0.140695	8.39068e-34	4.79611e-31	DDB_G0267358	DDB_G0267358_RTE, products: Skipper GAG-PRO
502.912	1.55067	0.166919	7.34993e-22	1.85348e-19	DDB_G0267362	DDB_G0267362_RTE, products: Skipper GAG-PRO-POL
254.496	1.55435	0.192501	2.73875e-17	5.72733e-15	DDB_G0267364	DDB_G0267364_RTE, products: Skipper GAG-PRO
1602.45	1.7093	0.11308	6.64177e-53	9.49109e-50	DDB_G0267366	DDB_G0267366_RTE, products: Skipper GAG-PRO-POL
248.736	-0.388172	0.228501	0.00311308	0.0401521	DDB_G0267372	DDB_G0267372_RTE, products: TRE5-A ORF1
581.493	0.0313597	0.0970992	0.623149	0.895029	DDB_G0267374	acpA, products: F-actin-capping protein subunit beta
2589.66	-0.0864835	0.0820794	0.152014	0.506557	DDB_G0267376	acrA, products: adenylate cyclase B
6654.42	0.0435902	0.0885612	0.479738	0.825144	DDB_G0267380	argE, products: acetylornithine deacetylase
10759.6	0.00653704	0.0658452	0.900761	0.978712	DDB_G0267382	corA, products: coronin
168.286	0.122127	0.152771	0.135405	0.479586	DDB_G0267384	culB, products: cullin B
4354.93	-0.0254537	0.0689323	0.637003	0.901442	DDB_G0267386	cysB, products: cystathionine beta-synthase
41.9301	-0.0920229	0.212541	0.246093	0.640948	DDB_G0267388	dafE, products: diaminopimelate epimerase
557.281	0.463785	0.150993	7.25681e-05	0.00180348	DDB_G0267390	psmB6, products: proteasome subunit beta type 6
62.1507	0.0858531	0.188258	0.278422	0.676718	DDB_G0267392	plbG, products: phospholipase B-like protein
221.318	-0.00689909	0.116094	0.918325	0.981856	DDB_G0267394	vps46, products: SNF7 family protein
74.4751	0.0377372	0.146983	0.600274	0.884538	DDB_G0267396	kif2, products: kinesin family member 2
57.0425	0.0169957	0.15371	0.810648	0.955791	DDB_G0267398	gppA, products: glycoprotein gp100
18191.9	0.033875	0.0665916	0.521497	0.847161	DDB_G0267400	hspD, products: heat shock protein Hsp90 family protein
4298.33	-0.0343783	0.0787739	0.554365	0.864113	DDB_G0267402	H3a, products: histone H3
1665.24	-0.00759756	0.0771772	0.894622	0.977631	DDB_G0267404	kif6, products: kinesin family member 6
367.651	0.0588699	0.110452	0.387178	0.768819	DDB_G0267406	lmpA, products: lysosomal integral membrane glycoprotein LmpA
199.295	0.211402	0.228062	0.0428081	0.257751	DDB_G0267408	psmA3, products: proteasome subunit alpha type 3
148.388	-0.0744333	0.145309	0.323336	0.719862	DDB_G0267410	pslA, products: unknown
322.594	0.121046	0.133188	0.119494	0.452734	DDB_G0267414	repD, products: transcription factor IIH component
204.496	0.150589	0.180736	0.0929596	0.404381	DDB_G0267416	rpmA, products: DNA-dependent RNA polymerase
31398.9	0.126377	0.0955284	0.0587485	0.309404	DDB_G0267418	sahA, products: adenosylhomocysteinase
1966.5	-0.020123	0.113661	0.764258	0.943443	DDB_G0267420	sodA, products: superoxide dismutase
1505.2	0.0471781	0.096544	0.461881	0.818917	DDB_G0267422	tipC, products: tipC protein
214.207	-0.163539	0.16361	0.0650076	0.332365	DDB_G0267424	amtC, products: ammonium transporter C
693.012	-0.385483	0.159186	0.000585215	0.0101366	DDB_G0267426	cshA, products: citrate synthase
33.4021	0.0443815	0.190239	0.535148	0.854602	DDB_G0267428	abcH2, products: putative non-transporter ABC protein
57.0347	-0.0672231	0.186188	0.375444	0.760308	DDB_G0267430	abcG20, products: ABC transporter G family protein
383.844	-0.567511	0.201676	9.54646e-05	0.00227998	DDB_G0267432	abcG15, products: ABC transporter G family protein
7203.64	0.0746176	0.0793297	0.205975	0.585942	DDB_G0267436	abcF4, products: putative non-transporter ABC protein
547.326	-0.0363988	0.0941511	0.564406	0.868645	DDB_G0267438	abcA2, products: ABC transporter A family protein
7.02363	-0.0418001	0.265296	0.429629	NA	DDB_G0267440	lmpC, products:
60.0248	0.0634455	0.185743	0.398822	0.776453	DDB_G0267442	cdk8, products: cyclin-dependent kinase 8
1289.47	0.159556	0.107154	0.028321	0.196778	DDB_G0267444	phg1A, products: TM9 protein A
126.08	0.252516	0.217777	0.0216856	0.16542	DDB_G0267446	cnbA, products: calcineurin B
137.983	0.0295951	0.130097	0.672163	0.916506	DDB_G0267448	DDB_G0267448, products: erg4/erg24 family protein
799.109	-0.0475104	0.0957711	0.457308	0.816016	DDB_G0267450	pakC, products: p21-activated protein kinase, putative protein serine/threonine kinase, pleckstrin homology (PH) domain-containing protein, STE20 family protein kinase, PH domain-containing protein, protein kinase, STE group, PAKA subfamily protein kinase
1402.79	0.0582215	0.105042	0.383168	0.767472	DDB_G0267452	sonA, products: UAS domain-containing protein, ubiquilin domain-containing protein
9333.13	0.0060365	0.0775782	0.916399	0.981856	DDB_G0267454	ancA, products: ADP/ATP translocase, transmembrane protein, mitochondrial substrate carrier family protein
1195.06	0.363785	0.143904	0.000474452	0.00842226	DDB_G0267456	cbp2, products: calcium-binding protein 2
713.44	0.114504	0.103914	0.0981616	0.413466	DDB_G0267458	DDB_G0267458, products: unknown
139.882	0.21547	0.210666	0.0369799	0.233308	DDB_G0267460	cybA, products: p22-like superoxide-generating NADPH oxidase light subunit
279.59	-0.0362592	0.122068	0.599918	0.884538	DDB_G0267462	Dd5P4, products: RhoGAP domain-containing protein, inositol 5-phosphatase
174.73	-0.0295919	0.12675	0.670267	0.914961	DDB_G0267464	polA, products: mitochondrial DNA polymerase A
252.907	-0.00816226	0.118014	0.903899	0.980324	DDB_G0267466	cupA, products: calcium up-regulated protein, ricin B lectin domain-containing protein
239.835	-0.129265	0.16272	0.124948	0.460588	DDB_G0267470	dicB, products: discoidin-inducing complex (DIC) protein
1305.9	0.0244593	0.0828316	0.680981	0.921859	DDB_G0267472	roco7, products: protein kinase Roco7
1560.42	0.0282007	0.0879382	0.64489	0.904364	DDB_G0267480	nup93, products: nucleoporin 93
985.705	-0.0224146	0.0957622	0.723207	0.934838	DDB_G0267482	DDB_G0267482, products:
80.8526	-0.0586529	0.162353	0.433189	0.802093	DDB_G0267484	acp1, products: acid phosphatase 1
100.206	-0.160902	0.221124	0.08832	0.393558	DDB_G0267486	DDB_G0267486, products: 2Fe-2S type ferredoxin
24.6018	0.087813	0.228729	0.252051	0.648003	DDB_G0267488	DDB_G0267488, products:
138.933	-0.0962692	0.151637	0.220754	0.60619	DDB_G0267490	ChLim, products: LIM-type zinc finger-containing protein, calponin homology (CH) domain-containing protein
625.032	0.109367	0.112694	0.126706	0.463671	DDB_G0267492	DDB_G0267492, products: peptidase M41, FtsH domain-containing protein
22.8021	-0.0511402	0.205108	0.470394	0.821136	DDB_G0267494	DDB_G0267494, products:
2918.59	-0.254614	0.119486	0.00243987	0.0334177	DDB_G0267496	DDB_G0267496, products:
27.1574	-0.0251786	0.213187	0.696735	0.928152	DDB_G0267498	pgpep, products: pyroglutamyl-peptidase I
112.397	-0.0406156	0.141664	0.571826	0.872739	DDB_G0267500	DDB_G0267500, products: phosphoesterase, PA-phosphatase related-family protein, PAP2 family protein
155.503	0.0175528	0.138627	0.80277	0.952877	DDB_G0267502	DDB_G0267502, products:
251.842	0.0883837	0.143575	0.248532	0.644137	DDB_G0267504	DDB_G0267504, products: putative amino acid permease
56.4548	-0.0287911	0.15729	0.687886	0.92493	DDB_G0267506	aslH, products: putative acetyl-CoA synthetase
1840.45	-0.117355	0.103646	0.0903382	0.398434	DDB_G0267508	DDB_G0267508, products: UPF0041 family protein
89.8635	0.047079	0.157461	0.52098	0.847058	DDB_G0267512	DDB_G0267512, products: peptidase M22 family protein
1545.03	-0.00236435	0.0830583	0.968268	0.993656	DDB_G0267514	DDB_G0267514, products: protein kinase, TKL group, tyrosine kinase-like protein
337.151	-0.127394	0.138735	0.109429	0.433972	DDB_G0267516	dhx57, products: DEAD/DEAH box helicase, RWD domain-containing protein
27.0217	-0.0382181	0.192043	0.587124	0.877863	DDB_G0267522	DDB_G0267522, products:
549.107	0.152833	0.152501	0.0726974	0.353349	DDB_G0267524	ssr3, products: translocon-associated protein TRAP gamma subunit
895.661	-0.00752204	0.101445	0.907091	0.980633	DDB_G0267526	DDB_G0267526, products:
8701.3	0.483935	0.0866032	1.82591e-09	1.53484e-07	DDB_G0267528	DDB_G0267528, products:
4609.64	-0.0539658	0.157342	0.466457	0.820054	DDB_G0267530	DDB_G0267530, products:
826.193	-0.0628654	0.0929277	0.322743	0.719862	DDB_G0267534	DDB_G0267534, products:
408.962	-0.138759	0.144323	0.0903085	0.398434	DDB_G0267536	hibch, products: 3-hydroxyisobutyryl-coenzyme A hydrolase
1334.33	-0.106472	0.0956594	0.10719	0.431174	DDB_G0267538	DDB_G0267538, products: Arf GTPase activating protein
379.482	0.0225009	0.100823	0.727301	0.936604	DDB_G0267540	scy1, products: SCY1 family protein kinase Scy1
11.4987	-0.0290291	0.241236	0.614218	0.890118	DDB_G0267544	aslM, products: putative acetyl-CoA synthetase, AMP-dependent synthetase and ligase domain-containing protein
81.4755	-0.00884536	0.147336	0.900189	0.9786	DDB_G0267546	DDB_G0267546, products: Thiamin pyrophosphokinase 1
370.28	-0.122804	0.133324	0.115084	0.445994	DDB_G0267548	elmoF, products: engulfment and cell motility ELM family protein F
562.18	-0.131965	0.12153	0.081006	0.374822	DDB_G0267552	DDB_G0267552, products: putative NADH dehydrogenase (ubiquinone), putative NADH-ubiquinone oxidoreductase 13 kDa subunit
56.1219	-0.0152756	0.151736	0.829264	0.962593	DDB_G0267554	DDB_G0267554, products:
360.141	0.0117096	0.100715	0.855555	0.969002	DDB_G0267556	DDB_G0267556, products: SNF2-related domain-containing protein, CHR group protein, helicase, C-terminal domain-containing protein
196.313	0.248518	0.209565	0.0215775	0.164742	DDB_G0267560	uprt, products: uracil phosphoribosyltransferase
7.87669	0.0165764	0.252545	0.743727	NA	DDB_G0267564	DDB_G0267564, products:
6164.45	-0.168004	0.0933975	0.0131792	0.116822	DDB_G0267568	gacO, products: RhoGAP domain-containing protein
816.816	-0.807428	0.133477	1.4128e-11	1.63694e-09	DDB_G0267570	DDB_G0267570, products:
65.0881	0.0973831	0.188403	0.231301	0.620702	DDB_G0267572	DDB_G0267572, products: Glioma tumor suppressor candidate region gene 2 protein
127.208	-0.0209154	0.131123	0.764052	0.943443	DDB_G0267574	DDB_G0267574, products: phosphoglycerate mutase family protein
131.291	0.0537464	0.151595	0.466292	0.820054	DDB_G0267582	DDB_G0267582, products:
199.711	0.0618277	0.12436	0.384445	0.768174	DDB_G0267584	adcE, products: LIM-type zinc finger-containing protein, arrestin domain-containing protein
69.4552	-0.106296	0.199535	0.200583	0.576311	DDB_G0267586	DDB_G0267586, products:
2040.08	-0.0339791	0.0883483	0.580078	0.876161	DDB_G0267588	pikI, products: phosphatidylinositol phosphate kinase PikI
435.172	0.0933773	0.112997	0.186613	0.558276	DDB_G0267590	DDB_G0267590, products: GRAM domain-containing protein, v-SNARE family protein
1731.71	1.27665	0.127147	2.13247e-25	7.03222e-23	DDB_G0267592	DDB_G0267592, products:
24.8212	0.0817737	0.218175	0.283834	0.683871	DDB_G0267594	pfdn2, products: prefoldin beta-like domain containing protein, prefoldin subunit 2
384.857	-0.115725	0.128749	0.129106	0.468199	DDB_G0267596	DDB_G0267596, products:
15.9646	0.0414252	0.225218	0.523418	0.847392	DDB_G0267598	DDB_G0267598, products: enoyl-CoA hydratase/isomerase domain-containing protein
100.439	0.0506538	0.149258	0.48957	0.828688	DDB_G0267602	DDB_G0267602, products:
93.9825	0.092471	0.167752	0.246407	0.64118	DDB_G0267604	mserS, products: serine-tRNA ligase, mitochondrial
87.1616	0.0225855	0.164705	0.750742	0.940796	DDB_G0267606	fcf1, products: FCF1 family protein, PINc domain-containing protein
221.189	0.137942	0.15355	0.0994553	0.416576	DDB_G0267614	DDB_G0267614, products:
213.141	0.0212985	0.118441	0.753937	0.941637	DDB_G0267616	DDB_G0267616, products:
38.8658	-0.0978766	0.23385	0.214575	0.595586	DDB_G0267622	srp9, products: signal recognition particle 9 kDa subunit
225.312	-0.019146	0.116327	0.776807	0.945937	DDB_G0267624	DDB_G0267624, products:
77.9209	0.0390228	0.162165	0.590773	0.879238	DDB_G0267630	kil1, products: sulfotransferase
211.276	0.0301286	0.117	0.657777	0.910292	DDB_G0267636	mybM, products: putative myb transcription factor
6913.12	-0.224652	0.0921841	0.00130781	0.020331	DDB_G0267638	DDB_G0267638, products: myb domain-containing protein, SNF2-related domain-containing protein, CHR group protein, helicase, C-terminal domain-containing protein
707.637	-0.892917	0.141488	1.71561e-12	2.26302e-10	DDB_G0267640	gtaE, products: putative GATA-binding transcription factor, GATA zinc finger domain-containing protein 5
7.64023	-0.0721597	0.283962	0.229084	NA	DDB_G0267642	DDB_G0267642, products:
38.7079	0.112048	0.218713	0.18073	0.549377	DDB_G0267644	DDB_G0267644, products:
323.694	0.0148455	0.101816	0.818285	0.958335	DDB_G0267648	DDB_G0267648, products:
172.466	0.0855863	0.141117	0.259681	0.654853	DDB_G0267650	ireA, products: putative protein serine/threonine kinase, putative endoribonuclease, IRE family protein kinase
92.9914	-0.0157071	0.159521	0.824561	0.96084	DDB_G0267656	l2hgdh, products: L-2-hydroxyglutarate dehydrogenase
34.0209	-0.0274201	0.187669	0.693357	0.927081	DDB_G0267662	DDB_G0267662, products:
316.377	-0.0636694	0.117128	0.361718	0.751538	DDB_G0267666	gefW, products: RasGEF domain-containing protein
28.115	0.106659	0.233742	0.189463	0.562507	DDB_G0267668	hspL, products: heat shock protein Hsp20 domain-containing protein, putative alpha-crystallin-type heat shock protein
332.871	0.00591433	0.110688	0.928945	0.983805	DDB_G0267670	DDB_G0267670, products:
1375.87	-0.14702	0.143109	0.0746115	0.359575	DDB_G0267674	glcS, products: glycogen synthase
96.771	0.180157	0.204104	0.0628855	0.325789	DDB_G0267680	DDB_G0267680, products: unknown
407.829	-0.0247326	0.0980342	0.698731	0.929257	DDB_G0267682	ercc1, products: DNA excision repair protein 1
2251.28	-0.114835	0.0989698	0.0893645	0.395903	DDB_G0267686	DDB_G0267686, products: RGS domain-containing protein, protein kinase, TKL group, tyrosine kinase-like protein, ARK family protein kinase
143.725	0.0140748	0.123882	0.837371	0.96481	DDB_G0267688	cpnD, products: phospholipid-binding protein, copine D
546.62	-0.0598106	0.0992048	0.359727	0.750073	DDB_G0267690	icpA, products: inner centromere protein, ARK binding region family protein
95.0183	-0.108792	0.181111	0.190687	0.56397	DDB_G0267692	DDB_G0267692, products: EGF-like domain-containing protein
355.942	-0.0479847	0.118864	0.488086	0.828641	DDB_G0267704	mcfT, products: putative mitochondrial 2-oxodicarboxylate transporter
57.9437	-0.0373515	0.168136	0.605341	0.886368	DDB_G0267706	DDB_G0267706, products: E2F-associated phosphoprotein
19.0411	0.0214256	0.1991	0.749356	0.940476	DDB_G0267708	vps25, products: vacuolar protein sorting 25
256.127	-0.0963622	0.156041	0.223655	0.610585	DDB_G0267710	DDB_G0267710, products:
803.304	0.0202908	0.100415	0.752653	0.941277	DDB_G0267712	DDB_G0267712, products: CDGSH iron-sulfur domain-containing protein
692.666	-0.0505281	0.103523	0.444299	0.80854	DDB_G0267714	sf3b4, products: RNA-binding region RNP-1 domain-containing protein, RNA recognition motif-containing protein RRM, splicing factor 3B subunit 4
65.179	-0.0142755	0.157285	0.840257	0.965873	DDB_G0267718	DDB_G0267718, products:
109.482	0.0614827	0.164966	0.41402	0.787048	DDB_G0267720	DDB_G0267720, products:
90.5929	0.0801969	0.171692	0.304757	0.703172	DDB_G0267722	DDB_G0267722, products:
27.4544	0.0119619	0.200532	0.856134	0.96917	DDB_G0267726	uduA2, products: unknown protein UduA2
29.4998	-0.210045	0.307491	0.0458143	0.268498	DDB_G0267728	uduA3, products: unknown protein UduA3
6192.11	-0.0867989	0.0742675	0.127974	0.465959	DDB_G0267730	dst2, products: STE20 family protein kinase Dst2
1418.13	-0.0583434	0.0976045	0.367944	0.755935	DDB_G0267732	DDB_G0267732, products:
5096.34	-0.0242648	0.0864757	0.689246	0.925543	DDB_G0267734	DDB_G0267734, products: putative SAM dependent methyltransferase
46.8073	-0.0371263	0.176347	0.605252	0.886368	DDB_G0267744	DDB_G0267744, products:
124.542	-0.205689	0.212352	0.0435729	0.260723	DDB_G0267746	DDB_G0267746, products:
163.692	0.0214951	0.123164	0.754289	0.941758	DDB_G0267748	cdc45, products: cell division cycle protein 45
22.4724	0.105239	0.244208	0.187421	0.559717	DDB_G0267750	DDB_G0267750, products:
10.7759	0.0929898	0.296825	0.160612	NA	DDB_G0267754	DDB_G0267754, products:
53.1208	-0.0807194	0.184744	0.30275	0.701183	DDB_G0267756	DDB_G0267756, products:
63.4012	-0.0463393	0.168097	0.52739	0.85093	DDB_G0267758	DDB_G0267758, products: type A von Willebrand factor (VWFA) domain-containing protein
215.226	0.0769122	0.137727	0.302306	0.700723	DDB_G0267760	tbck, products: RabGAP/TBC domain-containing protein, TBCK family protein kinase
85.5347	0.0170674	0.145629	0.809253	0.955791	DDB_G0267766	gfm2, products: mitochondrial translation elongation factor G
33.906	-0.0618529	0.199521	0.401716	0.778551	DDB_G0267768	DDB_G0267768, products: metal-dependent protein hydrolase domain-containing protein
49.4239	0.0473497	0.173203	0.518323	0.845305	DDB_G0267774	abkC, products: ABC1 family protein kinase AbkC
2548.51	-0.0743807	0.083819	0.220925	0.60619	DDB_G0267776	DDB_G0267776, products:
35.0238	-0.0565722	0.193208	0.440701	0.806698	DDB_G0267778	DDB_G0267778_RTE, products: TRE3-C ORF1
107.421	-0.0838621	0.158096	0.281233	0.680535	DDB_G0267780	DDB_G0267780_RTE, products: TRE3-C ORF2
88.3467	0.0306833	0.154793	0.669056	0.914619	DDB_G0267784	DDB_G0267784, products:
632.277	0.435026	0.162615	0.000246042	0.00495203	DDB_G0267786	DDB_G0267786, products: pleckstrin homology (PH) domain-containing protein
207.491	0.138582	0.183019	0.115631	0.447035	DDB_G0267788	DDB_G0267788, products:
254.317	-0.0213315	0.130516	0.759322	0.942909	DDB_G0267790	DDB_G0267790, products:
26.3084	0.920545	0.648043	0.000457683	0.00817537	DDB_G0267792	DDB_G0267792, products:
628.863	0.000549907	0.0881881	0.992811	0.998166	DDB_G0267794	DDB_G0267794, products: putative tRNA pseudouridine synthase
1421.67	-0.056012	0.0807979	0.344333	0.738079	DDB_G0267796	DDB_G0267796, products: initiation factor eIF-4 gamma middle domain-containing protein, putative RNA splicing factor, initiation factor eIF-4 gamma, MA3 domain-containing protein
698.08	-0.203066	0.119432	0.0111821	0.104326	DDB_G0267798	DDB_G0267798, products:
65.552	0.00522702	0.167758	0.940623	0.98617	DDB_G0267800	DDB_G0267800, products:
448.449	-0.0155051	0.106404	0.813182	0.956255	DDB_G0267804	DDB_G0267804, products:
173.191	-0.214861	0.203409	0.0355921	0.227736	DDB_G0267808	DDB_G0267808, products:
369.478	-0.0968696	0.137225	0.204676	0.58373	DDB_G0267810	DDB_G0267810, products:
18.3068	0.109555	0.262201	0.165501	0.526925	DDB_G0267814	DDB_G0267814, products:
37.6783	0.10569	0.230167	0.193817	0.566899	DDB_G0267816	DDB_G0267816, products:
547.457	-0.350309	0.155211	0.00104539	0.0168799	DDB_G0267818	DDB_G0267818, products:
113.474	-0.0563703	0.167836	0.449977	0.810985	DDB_G0267820	DDB_G0267820, products:
487.218	-0.00686702	0.168438	0.922034	0.982662	DDB_G0267822	DDB_G0267822, products: UPF0293 protein C16orf42
47.6959	-0.059315	0.186316	0.425543	0.796813	DDB_G0267824	DDB_G0267824, products:
108.025	0.136588	0.18044	0.118569	0.451225	DDB_G0267828	DDB_G0267828, products:
60.6519	-0.00893839	0.157715	0.899313	0.978534	DDB_G0267830	gemA, products: mitochondrial GTPase
23.5657	-0.0625639	0.214131	0.38529	0.768819	DDB_G0267832	DDB_G0267832, products:
47.0968	0.018064	0.162102	0.798918	0.952569	DDB_G0267834	DDB_G0267834, products:
17.5544	-0.0321171	0.199625	0.638329	0.901896	DDB_G0267836	DDB_G0267836, products:
210.805	0.226814	0.21206	0.0311587	0.210192	DDB_G0267838	DDB_G0267838, products: unknown
28.1126	2.27373	0.687675	4.8309e-07	2.09193e-05	DDB_G0267840	DDB_G0267840, products:
20.0679	-0.00918309	0.202659	0.888302	0.975827	DDB_G0267846	expl1, products: expansin-like protein
166.712	-0.144508	0.197098	0.109179	0.433972	DDB_G0267848	DDB_G0267848, products: beta-lactamase-type transpeptidase fold containing protein
1830.52	0.0282225	0.0894006	0.647004	0.905996	DDB_G0267850	DDB_G0267850, products: ribosomal protein L1 family protein
121.131	-0.0673146	0.156251	0.373327	0.758431	DDB_G0267852	DDB_G0267852, products: maf family protein
1529.9	-0.0697651	0.0830511	0.247808	0.643068	DDB_G0267854	gxcD, products: RhoGEF domain-containing protein, calponin homology (CH) domain-containing protein, villin headpiece (VHP) domain-containing protein
22.9064	-0.0493549	0.209785	0.47914	0.824763	DDB_G0267856	DDB_G0267856, products: FNIP repeat-containing protein
20.7297	-0.0323932	0.19626	0.638346	0.901896	DDB_G0267858	DDB_G0267858, products:
866.704	0.227854	0.146975	0.01261	0.113094	DDB_G0267866	DDB_G0267866, products: proteasome maturation factor UMP1 family protein
10.8842	0.010027	0.232534	0.861376	0.970272	DDB_G0267868	DDB_G0267868, products:
132.97	-0.185116	0.183858	0.0513226	0.284447	DDB_G0267870	rnf113, products: RING zinc finger-containing protein 113
54.5583	0.018446	0.165949	0.794405	0.951265	DDB_G0267872	DDB_G0267872, products: NOL1/NOP2/Sun family protein
37.9963	0.0649891	0.193104	0.386088	0.768819	DDB_G0267874	DDB_G0267874, products: Solute carrier family 15 member 1
1330.62	-0.125335	0.0930641	0.0571487	0.304155	DDB_G0267882	DDB_G0267882, products:
260.516	-0.00919994	0.110172	0.88957	0.976479	DDB_G0267884	alg12, products: glycosyltransferase, dolichyl-phosphate-mannose alpha-1,6-mannosyltransferase
599.574	-0.183591	0.143899	0.0331413	0.217575	DDB_G0267886	DDB_G0267886, products: NFATC2-interacting protein
15.9746	0.0235247	0.210778	0.717081	0.932828	DDB_G0267888	DDB_G0267888, products:
533.16	-0.158421	0.135906	0.0525238	0.289106	DDB_G0267890	DDB_G0267890, products:
288.084	-0.0455098	0.121983	0.513282	0.844014	DDB_G0267892	DDB_G0267892, products:
1474.06	-0.124378	0.0999481	0.0689089	0.342097	DDB_G0267894	DDB_G0267894, products:
32.3705	0.10654	0.242197	0.185274	0.555311	DDB_G0267902	DDB_G0267902, products:
196.628	-0.0358773	0.12561	0.606483	0.886613	DDB_G0267904	DDB_G0267904, products: WD40 repeat-containing protein
130.591	0.0248022	0.131485	0.722635	0.934662	DDB_G0267906	DDB_G0267906, products: OTU domain containin protein
29.7114	-0.0925782	0.242917	0.224517	0.611988	DDB_G0267908	DDB_G0267908, products:
60.2316	0.0760169	0.194857	0.323775	0.720116	DDB_G0267910	DDB_G0267910, products:
89.1474	-0.0399034	0.156719	0.582625	0.876161	DDB_G0267914	DDB_G0267914, products:
143.984	-0.00375595	0.133728	0.956937	0.9901	DDB_G0267916	mtmr15, products: myotubularin related protein 15
209.574	-0.00430008	0.112882	0.948605	0.988174	DDB_G0267918	DDB_G0267918, products: Nucleoporin GLE1
1029.52	0.240913	0.12761	0.00510474	0.058749	DDB_G0267924	DDB_G0267924, products: sodium/potassium-transporting ATPase subunit alpha 2
178.346	-0.110759	0.145369	0.162231	0.523027	DDB_G0267928	tmem144B, products: transmembrane protein 144 B
11.8224	-0.216305	0.445015	0.0213201	0.163213	DDB_G0267930	DDB_G0267930, products: unknown
18.8229	-0.092474	0.245235	0.222897	0.609412	DDB_G0267932	DDB_G0267932, products:
51.2301	-0.0217423	0.167924	0.759086	0.942909	DDB_G0267938	DDB_G0267938, products:
20.1832	-0.0413819	0.204668	0.548755	0.862242	DDB_G0267940	DDB_G0267940, products:
535.786	0.078357	0.109723	0.25591	0.651228	DDB_G0267942	DDB_G0267942, products: GRAM domain-containing protein
2479.6	0.0441879	0.0781483	0.44634	0.810102	DDB_G0267948	ccdc53, products: WASH complex subunit ccdc53
122.265	-0.0515695	0.147621	0.481558	0.825699	DDB_G0267950	copE, products: coatomer protein complex epsilon subunit
38.0801	-0.0275233	0.198996	0.684786	0.923108	DDB_G0267952	DDB_G0267952, products:
103.547	-0.0231961	0.161319	0.744717	0.939129	DDB_G0267954	DDB_G0267954, products: putative RNA modifying methyltransferase
6501.38	-0.0974565	0.0986792	0.144172	0.494056	DDB_G0267956	abiA, products: component of SCAR regulatory complex
881.642	0.0191437	0.0879689	0.753947	0.941637	DDB_G0267958	DDB_G0267958, products: bromodomain-containing protein, SMAD/FHA domain-containing protein, BRD group protein
264.941	-0.00555048	0.105106	0.932185	0.984669	DDB_G0267960	cog4, products: oligomeric Golgi complex component
1522.28	-0.0383863	0.0913561	0.538516	0.856727	DDB_G0267962	tsuA, products: ULK family protein kinase TsuA
2119.27	0.00838172	0.0697946	0.877311	0.973856	DDB_G0267966	pyd1, products: dihydropyrimidine dehydrogenase
13.7918	-0.064063	0.247333	0.334276	0.73102	DDB_G0267968	DDB_G0267968, products:
631.96	-0.130781	0.131689	0.0945713	0.406641	DDB_G0267974	DDB_G0267974, products:
89.9999	-0.024303	0.151416	0.733126	0.936958	DDB_G0267976	aph1, products: gamma-secretase subunit Aph-1
1097.37	0.0449094	0.0960127	0.482215	0.825965	DDB_G0267978	krsB, products: STE20 family protein kinase KrsB
110.366	0.0601821	0.161372	0.422295	0.793442	DDB_G0267980	mocs3, products: molybdenum cofactor synthesis 3
1461.54	0.375101	0.134248	0.000211943	0.0044	DDB_G0267982	copA, products: WD40 repeat-containing protein, coatomer protein complex alpha subunit
120.982	0.0528422	0.15185	0.473361	0.821996	DDB_G0267984	DDB_G0267984, products: peptidase M20 family protein, putative carboxypeptidase
28.9725	-0.158813	0.272546	0.0872152	0.390896	DDB_G0267988	DDB_G0267988, products:
94.5875	-0.0292322	0.170443	0.682088	0.922048	DDB_G0267990	ypel, products: yippee-like protein
55.7505	-0.170689	0.253719	0.0774302	0.367056	DDB_G0267992	DDB_G0267992, products: dual-specificity protein phosphatase
683.063	0.0430266	0.0997888	0.506976	0.839574	DDB_G0267994	DDB_G0267994, products: DNAJ heat shock N-terminal domain-containing protein
143.917	0.0354607	0.153282	0.622967	0.895029	DDB_G0267996	DDB_G0267996, products:
119.025	0.0273454	0.142709	0.700266	0.929503	DDB_G0268000	psiB, products: PA14 domain-containing protein
1678.74	-0.105104	0.109653	0.135922	0.479586	DDB_G0268004	snrp70, products: U1 small nuclear ribonucleoprotein 70 kDa protein
15.5669	-0.0607946	0.22242	0.387194	0.768819	DDB_G0268006	DDB_G0268006, products:
49.3697	-0.00848513	0.170825	0.903568	0.980324	DDB_G0268008	DDB_G0268008, products:
34.9366	-0.134316	0.269601	0.118191	0.451089	DDB_G0268012	DDB_G0268012, products: response regulator receiver domain-containing protein
462.44	0.0821116	0.132498	0.268222	0.665049	DDB_G0268014	gtf2h1, products: general transcription factor IIH component
154.371	-0.0941515	0.161119	0.236033	0.628297	DDB_G0268018	DDB_G0268018, products: alpha/beta hydrolase family protein
750.723	0.127139	0.122043	0.09185	0.401861	DDB_G0268020	bkdB, products: branched-chain alpha-keto acid dehydrogenase E1 beta chain
19.4103	-0.00759508	0.21396	0.903536	0.980324	DDB_G0268022	DDB_G0268022, products:
206.545	0.120599	0.14836	0.135762	0.479586	DDB_G0268024	hdaA, products: histone deacetylase family protein, type-1 histone deacetylase
147.806	0.240181	0.231681	0.0285623	0.198133	DDB_G0268026	DDB_G0268026, products: transmembrane protein
74.181	0.0450303	0.158826	0.538264	0.856727	DDB_G0268028	DDB_G0268028, products: unknown
810.319	-0.0317413	0.0891308	0.606427	0.886613	DDB_G0268030	DDB_G0268030, products:
1228.52	0.192963	0.135971	0.0227957	0.170705	DDB_G0268034	DDB_G0268034, products: Rab GDP dissociation inhibitor alpha
58.2636	-0.0653028	0.178729	0.388965	0.770027	DDB_G0268036	DDB_G0268036, products: 2,3-diketo-5-methylthio-1-phosphopentane enolase
1793.38	0.00228468	0.0922991	0.970694	0.994709	DDB_G0268038	mtpn, products: myotrophin family protein
231.462	-0.0515149	0.134528	0.473697	0.821996	DDB_G0268040	DDB_G0268040, products: Alpha- and gamma-adaptin-binding protein p34
6558.1	-0.0380954	0.0831064	0.523882	0.847823	DDB_G0268042	DDB_G0268042, products: CS domain-containing protein
4845.86	-0.130787	0.116429	0.0774439	0.367056	DDB_G0268044	DDB_G0268044, products: SIT4-associating protein SAP190
30.4372	-0.0717148	0.21654	0.332279	0.729684	DDB_G0268048	DDB_G0268048, products: UPF0172 protein
5595.35	-0.274231	0.0909059	0.000141426	0.00316603	DDB_G0268052	DDB_G0268052, products:
78.0673	0.063188	0.173979	0.402999	0.780006	DDB_G0268054	DDB_G0268054, products:
130.961	0.0134147	0.131233	0.846859	0.968	DDB_G0268056	sptA, products: serine C-palmitoyltransferase subunit 1
332.708	-0.0990047	0.137356	0.196202	0.570442	DDB_G0268060	DDB_G0268060, products: Putative sulfate transporter ychM
9.1642	0.089366	0.302605	0.156158	NA	DDB_G0268062	DDB_G0268062, products:
812.372	0.00450765	0.0976282	0.943452	0.986219	DDB_G0268064	DDB_G0268064, products: esterase/lipase/thioesterase domain-containing protein
93.8462	0.00207325	0.145774	0.976498	0.994743	DDB_G0268066	DDB_G0268066, products: putative ATPase
111.689	0.237768	0.287899	0.0339781	0.220369	DDB_G0268068	rab6, products: Rab GTPase
83.1162	0.0722131	0.168517	0.347424	0.740077	DDB_G0268070	DDB_G0268070, products:
37.4853	0.0503541	0.190978	0.487234	0.828641	DDB_G0268074	DDB_G0268074, products:
8.78513	-0.0635851	0.267646	0.297359	NA	DDB_G0268076	DDB_G0268076, products:
156.335	-0.0109439	0.132763	0.874993	0.973206	DDB_G0268078	DDB_G0268078, products: putative protein serine/threonine kinase, protein kinase, CMGC group, RCK family protein kinase
727.784	-0.0199746	0.178626	0.775134	0.945611	DDB_G0268080	rpc3, products: RNA polymerase III subunit
18.7043	-0.0591211	0.212517	0.40824	0.783606	DDB_G0268082	DDB_G0268082, products:
57.4306	0.0317937	0.165113	0.658014	0.910292	DDB_G0268084	wdr91, products: WD40 repeat-containing protein
854.085	-0.241776	0.130649	0.00556738	0.0625619	DDB_G0268088	lvsG, products: WD40 repeat-containing protein, BEACH domain-containing protein
64.9889	0.364208	0.307242	0.00838177	0.0849966	DDB_G0268090	DDB_G0268090, products: glycoside hydrolase family 18 protein
45.16	0.0120368	0.189502	0.859436	0.970189	DDB_G0268092	DDB_G0268092, products: SWIM-type zinc finger domain-containing protein
12.7068	0.0074979	0.227353	0.898699	0.978534	DDB_G0268096	DDB_G0268096, products:
2093.55	-0.0253627	0.0959612	0.689093	0.925483	DDB_G0268098	nop58, products: nucleolar protein 58
302.737	-0.0680048	0.118971	0.334517	0.73102	DDB_G0268100	asnS2, products: asparagine-tRNA ligase, asparaginyl-tRNA synthetase
3605.36	-0.0997415	0.079889	0.0951999	0.407918	DDB_G0268102	DDB_G0268102, products: Stress response protein NST1
1628.52	-0.017422	0.0850303	0.772083	0.945611	DDB_G0268104	gabT, products: 4-aminobutyrate aminotransferase
64.545	0.033167	0.169779	0.644037	0.90376	DDB_G0268110	DDB_G0268110, products: Kelch repeat-containing protein, SAM domain-containing protein
88.7712	-0.0459018	0.166838	0.531114	0.852336	DDB_G0268112	DDB_G0268112, products: unknown
291.054	-0.00537493	0.121447	0.937086	0.986152	DDB_G0268114	DDB_G0268114, products:
56.9246	0.056421	0.181542	0.447301	0.810551	DDB_G0268116	DDB_G0268116, products: TPR repeat-containing protein
267.183	0.0337469	0.124688	0.626811	0.897058	DDB_G0268118	DDB_G0268118, products: carbohydrate/purine kinase domain-containing protein, indigoidine synthase A like protein
13.6509	0.0496203	0.22888	0.453074	0.813882	DDB_G0268122	DDB_G0268122, products:
31.6192	0.0490785	0.197669	0.492309	0.831245	DDB_G0268126	DDB_G0268126, products: Hermansky-Pudlak syndrome 4 protein ortholog
155.534	-0.0705626	0.139962	0.342165	0.736191	DDB_G0268130	DDB_G0268130, products:
639.426	-0.195436	0.126686	0.0171475	0.140216	DDB_G0268132	DDB_G0268132, products: SET domain-containing protein
4420.22	-0.0531159	0.0868588	0.386562	0.768819	DDB_G0268134	DDB_G0268134, products:
47.8861	0.00327329	0.17538	0.962446	0.992306	DDB_G0268138	DDB_G0268138, products: putative glutathione S-transferase alpha-1
1332.72	0.0986183	0.120553	0.176485	0.543467	DDB_G0268140	DDB_G0268140, products:
77.6626	-0.0555085	0.184738	0.452555	0.81346	DDB_G0268142	DDB_G0268142, products:
2006.4	-0.00113347	0.0803244	0.984542	0.996281	DDB_G0268144	vwkA, products: alpha protein kinase VwkA
811.015	0.567064	0.121623	1.43215e-07	7.26584e-06	DDB_G0268154	DDB_G0268154, products:
132.484	-0.0787906	0.149144	0.301745	0.700723	DDB_G0268156	tsin, products: putative torsin-related ATPase
872.93	-0.420142	0.141754	0.000113496	0.00263004	DDB_G0268158	DDB_G0268158, products: PHD zinc finger-containing protein
14.9999	-0.0206582	0.210952	0.748826	0.940476	DDB_G0268160	gnt12, products: putative glycosyltransferase, putative GlcNAc transferase, putative beta-1,3-N-acetylglucosaminyltransferase
409.232	-0.0595688	0.125312	0.40211	0.778964	DDB_G0268162	DDB_G0268162, products:
67.5868	0.0461008	0.159016	0.52931	0.852103	DDB_G0268164	DDB_G0268164, products:
199.99	0.113	0.145325	0.155088	0.511236	DDB_G0268168	png, products: peptide N-glycanase
90.223	-0.150593	0.201879	0.100141	0.418076	DDB_G0268176	DDB_G0268176, products:
93.888	0.0467146	0.151694	0.522644	0.847336	DDB_G0268180	DDB_G0268180, products:
1132.33	0.00662454	0.0927618	0.915354	0.981856	DDB_G0268182	DDB_G0268182, products:
12.8562	0.0359518	0.219005	0.581062	0.876161	DDB_G0268184	DDB_G0268184, products: putative glycosyltransferase
219.717	-0.220914	0.173421	0.0235548	0.174122	DDB_G0268186	DDB_G0268186, products:
81.9277	-0.0365008	0.148042	0.612098	0.889664	DDB_G0268190	fut11, products: glycosyltransferase, alpha-3/4-fucosyltransferase, LamG-like jellyroll fold domain-containing protein
8.06085	-0.0272544	0.249878	0.614633	NA	DDB_G0268192	DDB_G0268192, products: AhpC/TSA family protein
210.853	0.11573	0.155267	0.155345	0.511361	DDB_G0268194	DDB_G0268194, products: dCTP deaminase
66.5455	-0.0646878	0.173653	0.393372	0.772685	DDB_G0268196	DDB_G0268196, products:
27.5462	-0.0400829	0.197415	0.566515	0.869792	DDB_G0268198	rpa43, products: RNA polymerase I subunit
48.2729	-0.0109699	0.160463	0.876604	0.973701	DDB_G0268202	DDB_G0268202, products:
59.2462	-0.820051	0.469225	0.000383808	0.00709639	DDB_G0268208	DDB_G0268208, products:
25.4385	-0.122784	0.269348	0.136188	0.480132	DDB_G0268210	DDB_G0268210, products: unknown
201.965	-0.186926	0.178534	0.0475338	0.274231	DDB_G0268216	fncD2, products: Fanconi anemia group D2 protein
73.8138	-0.0280705	0.159045	0.695082	0.927728	DDB_G0268218	DDB_G0268218, products:
36.8429	-0.0313534	0.187769	0.654183	0.908482	DDB_G0268220	DDB_G0268220, products: leucine-rich repeat-containing protein
1146.33	-0.194939	0.154184	0.0303464	0.2065	DDB_G0268222	DDB_G0268222, products: acid phosphatase
79.1695	0.0847204	0.175066	0.28324	0.683458	DDB_G0268224	DDB_G0268224, products: DDT domain-containing protein
122.48	0.0070768	0.127816	0.918257	0.981856	DDB_G0268228	DDB_G0268228, products:
34.9319	-0.110877	0.217594	0.184168	0.553822	DDB_G0268230	DDB_G0268230, products: Multidrug resistance protein mdtG
2242.06	0.303362	0.104867	0.000189818	0.00399877	DDB_G0268232	DDB_G0268232, products: small MutS related (smr) family protein, ubiquitin system component Cue domain containing protein
5928.28	0.00602153	0.0659974	0.908681	0.981092	DDB_G0268236	DDB_G0268236, products:
34.028	-0.0373419	0.207481	0.581688	0.876161	DDB_G0268238	alg3, products: glycosyltransferase, dolichyl-phosphate-mannose alpha-1,3-mannosyltransferase
2103.78	0.000713135	0.0754101	0.989959	0.997638	DDB_G0268244	DDB_G0268244, products: DNA topoisomerase 2-associated protein PAT1
104.926	-0.00105775	0.140026	0.987954	0.996789	DDB_G0268246	DDB_G0268246, products: unknown
67.0409	-0.00147998	0.157321	0.98326	0.995612	DDB_G0268252	DDB_G0268252, products:
504.3	-0.0072145	0.103011	0.911342	0.981673	DDB_G0268258	kif12, products: kinesin family member 12
48.5228	0.101813	0.216148	0.21112	0.591909	DDB_G0268260	DDB_G0268260, products: UBX domain-containing protein 15
4934.68	0.113699	0.103764	0.100107	0.418076	DDB_G0268264	DDB_G0268264, products: unknown
877.258	-0.0630734	0.123474	0.374442	0.759513	DDB_G0268266	DDB_G0268266, products: RNA recognition motif-containing protein
189.334	-0.00700155	0.124316	0.9186	0.981856	DDB_G0268268	DDB_G0268268, products:
498.737	-0.0670561	0.107732	0.323069	0.719862	DDB_G0268270	DDB_G0268270, products: peptidase M8 family protein
41.79	0.0105538	0.182768	0.878204	0.974468	DDB_G0268274	DDB_G0268274, products:
26.8989	0.0117792	0.185764	0.863503	0.97033	DDB_G0268280	DDB_G0268280, products:
17.5363	-0.0144941	0.207714	0.822553	0.960383	DDB_G0268286	DDB_G0268286, products:
31.0307	-0.100617	0.230886	0.208034	0.587899	DDB_G0268288	DDB_G0268288, products: Putative ATP-dependent helicase HRQ1
11988.2	-0.0343365	0.144731	0.631626	0.898848	DDB_G0268302	rpl38, products: S60 ribosomal protein L38
118.802	-0.00760012	0.138858	0.913585	0.981856	DDB_G0268316	DDB_G0268316, products: PH domain-containing protein, LIM-type zinc finger-containing protein
415.821	0.114697	0.11864	0.119183	0.451757	DDB_G0268318	DDB_G0268318, products:
1854.04	0.184041	0.104602	0.0119015	0.108715	DDB_G0268320	DDB_G0268320, products: CHAPS family protein
1081.26	-0.153651	0.117068	0.0426285	0.257211	DDB_G0268328	DDB_G0268328, products: unknown
116.753	-0.0906295	0.179286	0.257446	0.652886	DDB_G0268330	sgmD, products: putative sphingomyelinase
59.5968	0.200799	0.25481	0.0524174	0.288835	DDB_G0268332	uduA1, products: unknown protein UduA1
264.665	-0.116643	0.19018	0.169502	0.532542	DDB_G0268334	DDB_G0268334, products: Probable 26S protease subunit YTA6
21.8473	-0.0442513	0.199573	0.529244	0.852103	DDB_G0268336	DDB_G0268336, products:
25.777	-0.00118569	0.19623	0.985765	0.996609	DDB_G0268340	DDB_G0268340_RTE, products: TRE3-A ORF2
148.088	0.0027089	0.123474	0.968391	0.993656	DDB_G0268344	DDB_G0268344, products:
52.8961	0.106637	0.220897	0.19497	0.568403	DDB_G0268346	DDB_G0268346, products: patatin family protein
51.9892	0.00146928	0.18782	0.982738	0.995612	DDB_G0268348	DDB_G0268348, products:
205.711	-0.00299421	0.113626	0.964267	0.99275	DDB_G0268350	DDB_G0268350, products:
28.7856	-0.0927194	0.223115	0.23807	0.630979	DDB_G0268352	DDB_G0268352, products: EGF-like domain-containing protein
384.571	0.132602	0.121156	0.0793122	0.371542	DDB_G0268354	gxcGG, products: pleckstrin homology (PH) domain-containing protein, RhoGEF domain-containing protein, IQ calmodulin-binding domain-containing protein
135.388	-0.0605913	0.156071	0.417932	0.790245	DDB_G0268358	DDB_G0268358, products: cyclophilin-type peptidylprolyl cis-trans isomerase (PPIase)
657.902	-0.0842538	0.105663	0.21673	0.599821	DDB_G0268360	DDB_G0268360, products: unknown
1340.06	-0.185157	0.108387	0.0132108	0.116893	DDB_G0268364	DDB_G0268364, products:
76.7506	-0.0499307	0.1596	0.498215	0.835132	DDB_G0268366	DDB_G0268366, products:
1170.91	-0.6549	0.109729	7.73266e-11	8.08534e-09	DDB_G0268368	mybAA, products: myb domain-containing protein
377.936	-0.0253257	0.0959333	0.689485	0.92572	DDB_G0268384	DDB_G0268384, products:
179.82	0.0346802	0.134831	0.624071	0.895529	DDB_G0268386	DDB_G0268386, products: SET domain-containing protein
772.958	-0.0625737	0.0964077	0.332835	0.730009	DDB_G0268394	DDB_G0268394, products:
361.138	-0.0509508	0.113498	0.455823	0.815196	DDB_G0268396	sep15, products: 15 kDa selenoprotein
951.515	0.453599	0.128735	1.77614e-05	0.000528772	DDB_G0268402	rab24, products: Rab GTPase
314.619	0.00558631	0.113049	0.933302	0.985241	DDB_G0268404	DDB_G0268404, products: DENN domain-containing protein
297.328	-0.0460105	0.110857	0.495639	0.834229	DDB_G0268410	drnB, products: dicer-like protein B
43.6444	-0.203528	0.283132	0.0506345	0.281909	DDB_G0268412	DDB_G0268412, products:
18.7449	-0.108502	0.263774	0.166619	0.52774	DDB_G0268420	DDB_G0268420, products:
136.312	-0.00353027	0.132387	0.959445	0.991229	DDB_G0268424	DDB_G0268424, products:
34.8693	-0.0344539	0.196457	0.618503	0.892768	DDB_G0268426	zplG, products: ZIP-like protein G
84.2661	0.0627404	0.177057	0.405561	0.781322	DDB_G0268430	DDB_G0268430, products:
17.681	-0.0134795	0.193725	0.84138	0.965873	DDB_G0268432	DDB_G0268432, products:
119	-0.0867497	0.174624	0.273749	0.671565	DDB_G0268434	DDB_G0268434, products:
205.785	-0.442066	0.242827	0.00177562	0.0259797	DDB_G0268442	DDB_G0268442, products:
17.9173	0.0262585	0.215334	0.682853	0.922245	DDB_G0268444	trafN, products: TNF receptor-associated factor N
183.916	1.08229	0.233284	2.02035e-08	1.27371e-06	DDB_G0268446	cbhA, products: cellobiohydrolase A
10.9446	0.0421714	0.245189	0.481336	0.825699	DDB_G0268448	fam45, products: FAM45 family protein
165.433	-0.0385357	0.132519	0.585886	0.8776	DDB_G0268452	DDB_G0268452, products: v-SNARE family protein
9.52364	-0.150196	0.356578	0.0604501	NA	DDB_G0268454	DDB_G0268454, products: unknown
16.5897	-0.111068	0.274136	0.153765	0.509572	DDB_G0268456	DDB_G0268456, products: hssA/2C/7E family protein
150.763	-0.93011	0.316989	1.67884e-05	0.000503301	DDB_G0268462	DDB_G0268462, products: putative transmembrane protein
571.226	-0.492839	0.134464	9.95064e-06	0.000318346	DDB_G0268470	DDB_G0268470_RTE, products: TRE5-A ORF1
404.861	-0.103014	0.133773	0.176813	0.543932	DDB_G0268472	naprt, products: nicotinate phosphoribosyltransferase-like protein
573.947	-0.6159	0.126702	4.25225e-08	2.3986e-06	DDB_G0268474	DDB_G0268474_RTE, products: TRE5-A ORF1
315.796	0.0952949	0.133292	0.206773	0.586645	DDB_G0268478	DDB_G0268478, products: UPF0041 family protein
24.5899	-0.0682946	0.212499	0.353824	0.745922	DDB_G0268480	cdk10, products: putative protein serine/threonine kinase, CDK family protein kinase, putative cyclin-dependent kinase, protein kinase, CMGC group, PITSLRE subfamily protein kinase
182.352	0.0112016	0.118842	0.868729	0.971092	DDB_G0268492	DDB_G0268492, products:
198.803	0.108411	0.160988	0.182493	0.551338	DDB_G0268496	DDB_G0268496, products: Uncharacterized protein YKL027W
554.924	-0.0418744	0.106455	0.528227	0.851788	DDB_G0268498	areB, products: unknown
615.292	-0.0348924	0.0873988	0.568181	0.87011	DDB_G0268500	DDB_G0268500, products: unknown
251.652	-0.0917351	0.135245	0.224531	0.611988	DDB_G0268502	DDB_G0268502, products:
9315.34	-0.0286934	0.0789539	0.621734	0.894647	DDB_G0268504	DDB_G0268504, products: AAA ATPase domain-containing protein
1952.49	0.0663529	0.0855043	0.278215	0.676713	DDB_G0268506	DDB_G0268506, products: putative histone-like transcription factor
30.5257	-0.0432466	0.192154	0.543337	0.860046	DDB_G0268508	DDB_G0268508_RTE, products: TRE3-B
46.5933	-0.114636	0.232381	0.169857	0.532709	DDB_G0268510	DDB_G0268510_RTE, products: TRE3-A ORF1
249.01	0.0709268	0.122082	0.319858	0.717983	DDB_G0268512	wrn, products: ATP-dependent DNA helicase RecQ family protein, Werner syndrome protein
117.798	0.076821	0.148382	0.312039	0.709661	DDB_G0268516	tbcD, products: tubulin folding cofactor D
18.9506	0.303201	0.480906	0.0131398	0.116626	DDB_G0268518	DDB_G0268518, products: Ribosome-recycling factor, mitochondrial
71.8516	0.0389883	0.163992	0.591005	0.879313	DDB_G0268520	DDB_G0268520, products:
105.007	-0.0966157	0.299552	0.151077	0.505002	DDB_G0268522	psmG3, products: proteasome assembly chaperone 3
27.2757	-0.117626	0.243253	0.158723	0.517503	DDB_G0268524	DDB_G0268524_RTE, products: TRE3-B
155.683	-0.0234242	0.126255	0.734891	0.937368	DDB_G0268526	DDB_G0268526, products:
33.5254	0.0401677	0.186151	0.573549	0.873273	DDB_G0268528	DDB_G0268528_RTE, products: TRE3-C ORF2
197.253	-0.0664762	0.126302	0.354366	0.745969	DDB_G0268534	DDB_G0268534, products:
32.1299	-0.541145	0.504233	0.00307897	0.039904	DDB_G0268536	DDB_G0268536, products: F-box/LRR-repeat protein 7
754.612	0.365494	0.140318	0.000379406	0.00704119	DDB_G0268538	psmA5, products: proteasome subunit alpha type 5
198.762	-0.133785	0.149876	0.105133	0.428235	DDB_G0268548	pikF, products: phosphatidylinositol 3-kinase, PI3kinase
32.9981	-0.00293199	0.174749	0.966388	0.993264	DDB_G0268552	DDB_G0268552, products:
67.3961	-0.0351445	0.15631	0.626289	0.89676	DDB_G0268554	DDB_G0268554, products:
484.618	0.0220272	0.103964	0.73557	0.937368	DDB_G0268556	psiE, products: PA14 domain-containing protein
70.1043	0.0127353	0.152065	0.85715	0.969649	DDB_G0268558	DDB_G0268558, products: Ribosomal N-lysine methyltransferase 4
49.8832	0.0613406	0.18395	0.412997	0.78649	DDB_G0268560	DDB_G0268560, products: SWIM-type zinc finger domain-containing protein
40.7967	-0.0643917	0.187287	0.392321	0.771505	DDB_G0268564	DDB_G0268564, products: transmembrane protein, putative peroxisomal membrane protein
13.2452	-0.00892237	0.205283	0.890485	0.976544	DDB_G0268566	DDB_G0268566, products:
419.58	0.034675	0.106584	0.600163	0.884538	DDB_G0268574	eIF4e, products: eukaryotic translation initiation factor 4E
147.151	-0.15679	0.179597	0.0827945	0.379615	DDB_G0268576	DDB_G0268576, products:
754.401	-0.113611	0.104535	0.101569	0.421017	DDB_G0268578	gefV, products: RasGEF domain-containing protein, leucine-rich repeat-containing protein (LRR)
102.361	-0.043293	0.140107	0.547085	0.861471	DDB_G0268580	DDB_G0268580_RTE, products: TRE3-C ORF2
46.9678	-0.0112394	0.160128	0.873628	0.972875	DDB_G0268582	DDB_G0268582_RTE, products: TRE3-C ORF1
42.4839	-0.0290745	0.175745	0.682126	0.922048	DDB_G0268586	DDB_G0268586, products:
29.6615	-0.0807834	0.208695	0.294228	0.695269	DDB_G0268588	DDB_G0268588, products:
479.066	0.0207089	0.0913324	0.738659	0.937505	DDB_G0268590	DDB_G0268590, products: unknown
784.793	0.178731	0.129548	0.0284667	0.19763	DDB_G0268592	dlpA, products: dynamin-like protein A
2042.34	0.525144	0.12529	1.27239e-06	4.89715e-05	DDB_G0268600	uduB, products: unknown
591.474	-0.624854	0.131283	6.48674e-08	3.49794e-06	DDB_G0268606	DDB_G0268606_RTE, products: TRE5-A ORF1
29.8979	0.0539052	0.199747	0.45489	0.815067	DDB_G0268608	DDB_G0268608_RTE, products: TRE3-B
1225.63	0.0173884	0.0828446	0.769845	0.945611	DDB_G0268614	msh6, products: mutS homolog, DNA mismatch repair protein
1856.25	0.0580534	0.0821735	0.331566	0.728749	DDB_G0268616	cepJ, products: centrosomal protein 224 kDa
305.748	-0.000233376	0.109164	0.997179	0.999679	DDB_G0268618	pinA, products: peptidyl-prolyl cis-trans isomerase PinA
670.622	0.0120873	0.0960812	0.848382	0.96845	DDB_G0268620	pkbA, products: AKT/PKB protein kinase PkbA
60.3409	-0.0258029	0.184608	0.711467	0.932237	DDB_G0268622	rac1B, products: Rho GTPase
23.1627	0.0389859	0.189839	0.581745	0.876161	DDB_G0268624	DDB_G0268624, products: UPF0405 family protein
40.8917	-0.0738397	0.195667	0.334731	0.73102	DDB_G0268626	DDB_G0268626, products: EGF-like domain-containing protein
16.2905	0.0107799	0.216134	0.86262	0.97033	DDB_G0268628	pykA, products: pyridoxal kinase
985.251	0.0336466	0.0906428	0.587937	0.878372	DDB_G0268630	spsA, products: spermidine synthase
26562.6	0.0379855	0.0890764	0.538245	0.856727	DDB_G0268632	abpA, products: actin binding protein A
208.561	-0.0607395	0.143675	0.410433	0.785151	DDB_G0268634	pde3, products: cGMP-specific phosphodiesterase 3
259.211	-0.00178687	0.103201	0.978004	0.994743	DDB_G0268636	roco11, products: LRRK family protein kinase Roco11
1060.63	0.0923314	0.0910057	0.148616	0.501102	DDB_G0268638	dstB, products: signal transducer and activator of transcription (STAT) family protein DstB
197.407	0.438057	0.205008	0.00092735	0.0153076	DDB_G0268642	DDB_G0268642, products: putative protein serine/threonine kinase, putative eukaryotic translation initiation factor 2 alpha (eIF2alpha) kinase, PEK family protein kinase
4556.94	-0.0300722	0.0858321	0.619478	0.893124	DDB_G0268646	DDB_G0268646, products: unknown
5675.54	0.103275	0.0789383	0.082335	0.377912	DDB_G0268650	DDB_G0268650, products:
187.842	0.0459705	0.127735	0.514711	0.844134	DDB_G0268652	ippB, products: inositol polyphosphate phosphatase B
539.394	0.0148278	0.103315	0.819405	0.958862	DDB_G0268660	DDB_G0268660, products: DNA2/NAM7 helicase family protein
2168.62	-0.168073	0.0976907	0.0156898	0.131886	DDB_G0268662	DDB_G0268662, products: DNA2/NAM7 helicase family protein
2542.87	-0.0546895	0.094626	0.391494	0.770762	DDB_G0268664	aatA, products: aspartate aminotransferase, aspartate transaminase
178.145	0.201312	0.212213	0.0466373	0.271281	DDB_G0268666	DDB_G0268666, products:
41.6234	0.0196189	0.183726	0.777119	0.945937	DDB_G0268668	cycH, products: cyclin, putative H-type cyclin
215.613	0.00787257	0.127289	0.909033	0.981123	DDB_G0268678	DDB_G0268678, products: putative negative elongation factor D
135.343	-0.00788909	0.130761	0.909367	0.981237	DDB_G0268680	DDB_G0268680, products: putative purple acid phosphatase
136.99	-0.0616972	0.147561	0.406187	0.781389	DDB_G0268684	DDB_G0268684, products: Protein MAK10 homolog
27.7833	-0.247835	0.38185	0.0274103	0.192007	DDB_G0268686	DDB_G0268686, products: C2 domain-containing protein
104.361	0.0109731	0.148373	0.876504	0.973701	DDB_G0268696	DDB_G0268696, products:
267.952	0.398382	0.223371	0.00247096	0.0337357	DDB_G0268698	DDB_G0268698, products: ENTH/VHS domain-containing protein, protein of unknown function DUF2043
1323.53	0.256923	0.11213	0.00153601	0.0231863	DDB_G0268702	copD, products: coatomer protein complex delta subunit
212.098	0.00640644	0.116126	0.92414	0.982952	DDB_G0268704	DDB_G0268704, products:
3288.35	-0.0636565	0.0905522	0.311098	0.709025	DDB_G0268706	ints3, products: integrator complex subunit 3
26.1648	0.111693	0.246903	0.170176	0.532709	DDB_G0268708	DDB_G0268708, products:
1214.72	-0.268513	0.122345	0.00186732	0.0270904	DDB_G0268710	DDB_G0268710, products:
21.4753	0.0756048	0.224945	0.305863	0.70402	DDB_G0268714	ctu2, products: cytosolic thiouridylase subunit 2
222.755	0.0483265	0.116775	0.482632	0.825965	DDB_G0268718	ptcE, products: pentatricopeptide repeat-containing protein E
859.537	0.0820984	0.104195	0.225162	0.612287	DDB_G0268720	selk, products: selenoprotein K
32.7641	0.0219656	0.173877	0.755412	0.941758	DDB_G0268742	DDB_G0268742, products:
34.586	-0.026758	0.187922	0.699958	0.929448	DDB_G0268744	act23, products: actin
153.428	0.125301	0.194043	0.148024	0.501102	DDB_G0268746	DDB_G0268746, products: UBX domain-containing protein 17
859.206	0.14757	0.123107	0.0560184	0.300582	DDB_G0268758	ola1, products: Obg-like ATPase
65.4307	-0.00205252	0.162195	0.976746	0.994743	DDB_G0268760	rabQ, products: Rab GTPase
659.983	0.120578	0.112957	0.0957449	0.409435	DDB_G0268762	DDB_G0268762, products: Coiled-coil domain-containing protein 86
1627.16	0.0063575	0.0781339	0.912288	0.981795	DDB_G0268764	DDB_G0268764, products:
16.9307	0.0296084	0.202038	0.661108	0.911162	DDB_G0268772	DDB_G0268772, products:
16.9758	0.0161184	0.224968	0.789465	0.949617	DDB_G0268774	DDB_G0268774, products: Uncharacterized protein C9orf78
10.7109	-0.0828195	0.278139	0.211671	NA	DDB_G0268776	gatB, products: glutamyl-tRNA(Gln) amidotransferase B subunit
518.819	0.117083	0.112463	0.104017	0.426181	DDB_G0268778	rbbB, products: ARID/BRIGHT DNA binding domain-containing protein, transcription factor jumonji, jmjC domain-containing protein, transcription factor jumonji, jmjN domain-containing protein, putative Retinoblastoma (Rb) binding protein
53.1735	-0.0160199	0.169547	0.820103	0.959227	DDB_G0268786	DDB_G0268786, products: Glucokinase regulatory protein
1411.46	-0.0748581	0.0898287	0.234322	0.626075	DDB_G0268790	DDB_G0268790, products: plexin repeat-containing protein
678.114	-0.243794	0.152028	0.00986122	0.0953214	DDB_G0268792	gtaF, products: putative GATA-binding transcription factor, GATA zinc finger domain-containing protein 6
91.6499	-0.0230752	0.146039	0.745177	0.939129	DDB_G0268794	bub2, products: RabGAP/TBC domain-containing protein, putative GTPase activating protein (GAP), putative mitotic checkpoint protein
14.0881	0.0458104	0.232023	0.476968	0.823339	DDB_G0268796	DDB_G0268796, products:
41.7432	-0.113258	0.22833	0.174678	0.539513	DDB_G0268808	DDB_G0268808, products:
1033.71	0.130065	0.106828	0.0670095	0.33658	DDB_G0268810	DDB_G0268810, products: transmembrane protein, magnesium-translocating P-type ATPase
271.41	-0.19431	0.198946	0.0485725	0.276351	DDB_G0268814	DDB_G0268814, products:
90.9735	-0.186918	0.22466	0.0606585	0.315958	DDB_G0268816	DDB_G0268816, products:
137.865	0.00528559	0.138854	0.939813	0.986152	DDB_G0268818	DDB_G0268818, products:
562.862	0.1404	0.120457	0.0644255	0.331563	DDB_G0268822	DDB_G0268822, products: cyclin-like F-box containing protein
47.3333	0.0664219	0.191203	0.378339	0.76219	DDB_G0268824	DDB_G0268824, products:
95.2171	-0.087997	0.17072	0.267091	0.663396	DDB_G0268826	DDB_G0268826, products:
1554.31	0.00591207	0.0915735	0.924035	0.982952	DDB_G0268828	DDB_G0268828, products: unknown
66.5753	0.0366573	0.172637	0.6107	0.88865	DDB_G0268846	DDB_G0268846, products:
5464.88	0.0536774	0.0766422	0.350939	0.742553	DDB_G0268848	DDB_G0268848, products: putative ATP binding protein
1370.6	0.311483	0.136255	0.00114986	0.0183252	DDB_G0268850	DDB_G0268850, products: putative ATP binding protein
1553.54	0.212639	0.127595	0.0110515	0.103445	DDB_G0268852	DDB_G0268852, products: putative ATP binding protein
33.9379	0.180698	0.287355	0.065472	0.333744	DDB_G0268854	gnt4, products: GlcNAc transferase, glycosyltransferase, alpha-1,3-mannosyl-glycoprotein beta-1,2-N-acetylglucosaminyltransferase
417.519	-0.0520606	0.114541	0.447878	0.810551	DDB_G0268860	rngB, products: RING zinc finger-containing protein, Kelch repeat-containing protein
400.013	-0.274137	0.186114	0.0104333	0.0991742	DDB_G0268862	DDB_G0268862, products: major facilitator superfamily protein
64.1859	-0.0635485	0.162274	0.399706	0.776596	DDB_G0268864	DDB_G0268864, products: E3 ubiquitin-protein ligase MYLIP
272.804	0.226579	0.17412	0.0213053	0.163213	DDB_G0268868	nat10, products: putative N-acetyltransferase
325.695	0.098409	0.147637	0.208744	0.589458	DDB_G0268870	DDB_G0268870, products:
3180.44	-0.0528031	0.0794434	0.368004	0.755935	DDB_G0268872	DDB_G0268872, products: UBP-type zinc finger-containing protein, peptidase C19 family protein, putative ubiquitin carboxyl-terminal hydrolase (UCH)
702.265	0.751584	0.172678	1.76681e-07	8.75643e-06	DDB_G0268874	DDB_G0268874, products:
507.651	-0.0801434	0.121254	0.264256	0.659986	DDB_G0268876	DDB_G0268876, products: filamin/ABP280 repeat-containing protein, protein kinase, TKL group, tyrosine kinase-like protein
4499.81	-0.40954	0.101707	2.88331e-06	0.00010431	DDB_G0268878	DDB_G0268878, products:
13.6287	0.0264202	0.217402	0.678805	0.920752	DDB_G0268880	atxn10, products: ataxin-10
10.7177	0.109562	0.325873	0.102663	NA	DDB_G0268884	DDB_G0268884, products: osmotically inducible family protein
3734.41	0.167628	0.0970272	0.0155279	0.131322	DDB_G0268886	vps13E, products: vacuolar protein sorting-associated protein 13 family protein
1121.79	0.0994064	0.0946797	0.128928	0.468199	DDB_G0268888	zizD, products: DOCK family protein, putative guanine nucleotide exchange factor (GEF)
31.9627	-0.0039497	0.17549	0.954693	0.990024	DDB_G0268890	aplJ, products: amoebapore-like protein J
536.826	-0.160742	0.139196	0.0521892	0.288133	DDB_G0268892	DDB_G0268892, products: unknown
864.143	-0.0141575	0.102841	0.827141	0.961528	DDB_G0268898	wdr75, products: WD40 repeat-containing protein, U3 snoRNP protein, U3 small nucleolar ribonucleoprotein
94.2793	0.0255907	0.135266	0.715904	0.932445	DDB_G0268902	DDB_G0268902, products:
131.076	-0.0537234	0.154759	0.467581	0.820848	DDB_G0268904	DDB_G0268904, products:
2717	-0.088034	0.0880783	0.160466	0.518986	DDB_G0268914	DDB_G0268914, products:
9.58578	0.0522534	0.249934	0.397445	NA	DDB_G0268916	DDB_G0268916, products:
1973.15	-0.272137	0.111933	0.000928685	0.0153076	DDB_G0268920	mef2A, products: MADS-box transcription factor Mef2A
1573.06	-0.0751601	0.0871296	0.225456	0.612503	DDB_G0268922	DDB_G0268922, products:
2030.77	-0.1303	0.096926	0.0537412	0.293863	DDB_G0268924	DDB_G0268924, products: Helicase SEN1
542.562	-0.0597237	0.116644	0.389907	0.77011	DDB_G0268928	DDB_G0268928, products: phosphoesterase, PA-phosphatase related-family protein
15.5611	0.0479802	0.231966	0.46045	0.817933	DDB_G0268934	DDB_G0268934, products: LYR motif-containing protein
40.6091	-0.0182455	0.188334	0.790159	0.949809	DDB_G0268938	ube2w, products: ubiquitin-conjugating enzyme E2W
18.3855	-0.0263437	0.199557	0.696547	0.928152	DDB_G0268944	DDB_G0268944_RTE, products: TRE3-B ORF2
947.192	-0.489126	0.165164	9.11243e-05	0.00220084	DDB_G0268948	DDB_G0268948, products: putative SAM dependent methyltransferase
144.711	0.0418773	0.135909	0.557271	0.86543	DDB_G0268958	DDB_G0268958_TE, products: Tdd-4
35.7926	-0.0204769	0.193043	0.7634	0.943276	DDB_G0268960	DDB_G0268960, products:
9.75815	-0.0388831	0.235275	0.529138	NA	DDB_G0268964	lip3, products: lipase family member 3
150.109	-0.0116078	0.130309	0.86701	0.970865	DDB_G0268966	lip1, products: lipase family member 1
315.685	0.0797885	0.147989	0.295502	0.696628	DDB_G0268968	DDB_G0268968, products:
103.923	-0.0898371	0.178265	0.260689	0.656353	DDB_G0268970	DDB_G0268970, products: cycloeucalenol cycloisomerase
114.824	-0.0150088	0.134187	0.82976	0.96262	DDB_G0268982	DDB_G0268982, products:
41.0385	-0.0861285	0.209922	0.270461	0.666965	DDB_G0268988	DDB_G0268988, products: RNA-binding region RNP-1 domain-containing protein
41.2215	0.0326046	0.182778	0.644788	0.904364	DDB_G0268990	DDB_G0268990, products: Mitochondrial GTPase 1
28.1474	-0.0237172	0.185496	0.732691	0.936958	DDB_G0268994	manC, products: alpha-mannosidase
101.376	-0.0231961	0.140716	0.742752	0.938816	DDB_G0268996	DDB_G0268996, products: major facilitator superfamily 1 transporter (MFS-1)
134.819	0.0514364	0.141497	0.479283	0.824844	DDB_G0269000	DDB_G0269000, products: unknown
13.223	0.0431367	0.23042	0.50103	0.835509	DDB_G0269004	DDB_G0269004, products:
1006.5	-0.0103072	0.0804942	0.860336	0.970272	DDB_G0269006	DDB_G0269006, products: C2H2-type zinc finger-containing protein, RNA-binding region RNP-1 domain-containing protein, RNA recognition motif-containing protein RRM, D111/G-patch domain-containing protein
9055.19	0.00507742	0.0644932	0.921831	0.982662	DDB_G0269014	DDB_G0269014, products: DUF3651 domain-containing protein
5711.28	-0.329902	0.111914	0.00014669	0.00326681	DDB_G0269016	cyp524A1, products: cytochrome P450 family protein
132.166	0.0017837	0.145646	0.979777	0.994743	DDB_G0269022	DDB_G0269022, products:
56.731	0.0999554	0.202544	0.220972	0.60619	DDB_G0269024	ate1, products: arginyltransferase
419.11	0.0916633	0.111723	0.192048	0.565262	DDB_G0269032	DDB_G0269032, products: coiled-coil domain-containing protein
166.844	-0.0723557	0.13306	0.324317	0.72076	DDB_G0269034	udkA, products: uridine kinase, uridine phosphokinase
11.6094	-0.0748561	0.257882	0.269442	0.665954	DDB_G0269036	DDB_G0269036_RTE, products: TRE3-B ORF2
1515.32	-0.0452261	0.0937554	0.47481	0.822218	DDB_G0269038	atp5D, products: ATP synthase F1 delta
672.667	-0.696081	0.1518	8.90562e-08	4.71338e-06	DDB_G0269040	DDB_G0269040, products: IPT/TIG domain-containing protein, EGF-like domain-containing protein, C-type lectin domain-containing protein
1344.37	0.136925	0.106124	0.0542921	0.295401	DDB_G0269046	DDB_G0269046, products: NAD(P)+ transhydrogenase (AB-specific)
1036.62	0.43227	0.141486	8.35381e-05	0.00203482	DDB_G0269048	DDB_G0269048, products:
222.998	-0.0417485	0.127736	0.552568	0.864113	DDB_G0269050	DDB_G0269050, products:
59.2752	0.00409726	0.15462	0.953705	0.98999	DDB_G0269052	DDB_G0269052, products:
129.645	0.0226612	0.148516	0.749897	0.940553	DDB_G0269054	ppwd1, products: WD40 repeat-containing protein, cyclophilin-type peptidylprolyl cis-trans isomerase (PPIase)
677.467	-0.189984	0.118845	0.0160324	0.133848	DDB_G0269056	DDB_G0269056_RTE, products: TRE5-A ORF2
658.079	-0.407668	0.137294	0.000115274	0.00264977	DDB_G0269058	DDB_G0269058_RTE, products: TRE5-A ORF1
94.55	-0.983028	0.327755	1.25908e-05	0.00039399	DDB_G0269060	DDB_G0269060, products:
68.5082	0.103021	0.189991	0.211279	0.591909	DDB_G0269062	DDB_G0269062, products: DUF974 family protein
106.308	0.0369399	0.133186	0.601402	0.884918	DDB_G0269070	DDB_G0269070, products: unknown
807.751	-0.610927	0.124918	3.80939e-08	2.19206e-06	DDB_G0269076	DDB_G0269076_RTE, products: TRE5-A ORF1
2300.37	0.0202002	0.0797524	0.72931	0.936958	DDB_G0269086	DDB_G0269086, products: alpha/beta hydrolase fold-1 domain-containing protein
863.184	-0.658653	0.123799	3.02622e-09	2.3588e-07	DDB_G0269094	DDB_G0269094_RTE, products: TRE5-A ORF1
16767.8	0.0068207	0.0757462	0.904423	0.980324	DDB_G0269100	abpC, products: actin binding protein C
1358.65	0.0906702	0.112265	0.197434	0.572279	DDB_G0269102	arcD, products: actin-related protein 2/3 complex, subunit 4
80.1672	0.0360477	0.158067	0.61795	0.89242	DDB_G0269104	calB, products: calmodulin-like protein
183.762	-0.108973	0.151412	0.173468	0.537569	DDB_G0269106	cahA, products: carbonic anhydrase
225.411	-0.000169809	0.119128	0.998	0.999679	DDB_G0269110	tspA, products: tetraspanin family protein
940.955	1.87776	0.131571	1.06383e-47	1.14016e-44	DDB_G0269112	celB, products: cellulose-binding protein
865.407	-0.358579	0.163157	0.00117466	0.018651	DDB_G0269114	numA, products: calmodulin-binding protein, nucleomorphin
1747.86	0.120656	0.120046	0.1049	0.428235	DDB_G0269118	cxeA, products: cytochrome c oxidase subunit V
1195.62	0.0417301	0.110281	0.534694	0.854529	DDB_G0269120	cypB, products: cyclophilin B
3930.69	0.0601678	0.108201	0.373588	0.758499	DDB_G0269122	cysA, products: cystathionine gamma-lyase
17.5294	0.143174	0.29558	0.0965715	0.410857	DDB_G0269124	dcsA, products: cellulose synthase
222.613	0.0225034	0.126859	0.745105	0.939129	DDB_G0269126	DDB_G0269126, products: unknown
264.138	0.0547687	0.124232	0.437751	0.803968	DDB_G0269130	phgA, products: putative GTPase activating protein (GAP) PhgA
56.7443	-0.0564857	0.193252	0.441273	0.8074	DDB_G0269132	ecmB, products: extracellular matrix protein ST310
185800	0.0279868	0.0739431	0.618292	0.892764	DDB_G0269134	efaAI, products: elongation factor 1 alpha, elongation factor 1a
82408.1	0.0510395	0.068203	0.342131	0.736191	DDB_G0269136	efaAII, products: elongation factor 1 alpha, elongation factor 1a
20965.3	0.00268777	0.0686477	0.960128	0.991346	DDB_G0269138	fttB, products: 14-3-3-like protein
1202.06	-0.0754645	0.0937508	0.240285	0.633324	DDB_G0269140	gapA, products: RasGTPase-activating protein GapA
1385.77	-0.0510955	0.090552	0.413533	0.786694	DDB_G0269142	hmgA, products: hmg CoA reductase A, hydroxymethylglutaryl CoA reductase
9093.02	0.0542892	0.0759926	0.343276	0.737039	DDB_G0269144	hspB, products: heat shock protein, heat shock cognate protein Hsc70-1
20450.1	-0.0821946	0.0838526	0.177619	0.544283	DDB_G0269146	ifdA, products: eukaryotic translation initiation factor 4A
1198.48	0.199886	0.111645	0.00934311	0.091343	DDB_G0269148	lkhA, products: leukotriene A4 hydrolase
1898.69	0.0171655	0.0824811	0.77225	0.945611	DDB_G0269150	lvsA, products: BEACH domain-containing protein
182.933	-0.0143357	0.119437	0.832852	0.962727	DDB_G0269152	mekA, products: MAP kinase kinase 1
1132.45	0.0975328	0.0919515	0.130147	0.469626	DDB_G0269154	modA, products: alpha-glucosidase II
10257.8	0.131163	0.0913852	0.0450968	0.265921	DDB_G0269156	mvpA, products: major vault protein-alpha
2851.44	-0.0766275	0.0927697	0.231091	0.620702	DDB_G0269158	npcA, products: Niemann-Pick C type protein
42949.8	0.0650584	0.094236	0.309769	0.707878	DDB_G0269160	nxnA, products: annexin VII
630.358	0.147698	0.1313	0.063364	0.327476	DDB_G0269162	atg13, products: autophagy protein 13
664.038	-1.09878	0.164861	1.68957e-13	2.58685e-11	DDB_G0269164	egeB, products: C2 domain-containing protein
1304.54	0.0635598	0.0897271	0.309727	0.707878	DDB_G0269166	pakA, products: serine/threonine-protein kinase PakA
1994.7	-0.0144019	0.0914953	0.816433	0.957868	DDB_G0269168	vps26, products: vacuolar protein sorting-associated protein 26
106.832	-0.140844	0.207677	0.117735	0.450144	DDB_G0269170	pmpA, products: putative membrane protein
737.5	-0.267612	0.136932	0.00356518	0.0450187	DDB_G0269172	pspC, products: prespore-specific protein
730.377	0.0700755	0.177272	0.360308	0.750371	DDB_G0269174	rab1C, products: Rab GTPase
151.942	0.0319733	0.129058	0.64748	0.90632	DDB_G0269180	rcdP, products: random cDNA clone veg114
269.123	-0.137739	0.164173	0.10739	0.431174	DDB_G0269182	pitC, products: phosphatidylinositol transfer protein 3
139.088	-0.0140911	0.129291	0.838779	0.96481	DDB_G0269184	rzpA, products: RING/leucine zipper protein
622.467	-0.0567251	0.110937	0.404688	0.780957	DDB_G0269186	snpC, products: soluble NSF attachment protein gamma isoform
965.298	-0.00568051	0.0893607	0.926266	0.983383	DDB_G0269188	snwA, products: SKIP/SNW domain-containing protein
504.967	-0.0372274	0.101609	0.567435	0.869878	DDB_G0269190	tcp1, products: t-complex polypeptide 1
169.905	-0.076162	0.135016	0.303806	0.702133	DDB_G0269192	tifA, products: DEAD/DEAH box helicase domain-containing protein, eukaryotic translation initiation factor 4A
8296.75	-0.125076	0.0878439	0.0500065	0.280754	DDB_G0269194	trfA, products: putative transcriptional regulator TrfA
4338.77	0.0268694	0.0772207	0.640168	0.902678	DDB_G0269196	tubB, products: beta-tubulin
14794.8	-0.0965786	0.0777861	0.100439	0.418447	DDB_G0269198	wimA, products: unknown
1659.65	0.0544426	0.0987331	0.402049	0.778964	DDB_G0269200	cplA, products: calpain-like cysteine protease
736.046	-0.593836	0.136013	4.52737e-07	1.98049e-05	DDB_G0269202	gdcA, products: gp64 and disintegrin-like, cysteine-rich protein
355.542	-0.198523	0.158147	0.0298412	0.204034	DDB_G0269204	dhkE, products: histidine kinase E
189.525	-0.805401	0.233533	4.6572e-06	0.000159087	DDB_G0269206	abcG21, products: ABC transporter G family protein
62.2804	-0.310856	0.320615	0.0156897	0.131886	DDB_G0269208	abcG19, products: ABC transporter G family protein
281.754	0.0452157	0.10965	0.501254	0.835509	DDB_G0269210	abcG14, products: ABC transporter G family protein
759.669	0.0408224	0.0900259	0.51074	0.841808	DDB_G0269212	abcG11, products: ABC transporter G family protein
713.979	0.0297225	0.103754	0.649347	0.907056	DDB_G0269214	abcG1, products: ABC transporter G family protein
65.1176	-0.0332958	0.184642	0.637233	0.901442	DDB_G0269216	cypE, products: cyclophilin-type peptidylprolyl cis-trans isomerase (PPIase)
278.129	-0.0556542	0.127235	0.434037	0.802247	DDB_G0269218	lyrm7, products: LYR motif-containing protein 7
135.156	-0.0792315	0.149811	0.299847	0.699609	DDB_G0269220	DDB_G0269220, products: cytochrome c oxidase subunit VIb
183.432	-0.0138998	0.120168	0.838105	0.96481	DDB_G0269222	gefB, products: Ras guanine nucleotide exchange factor
79.7762	-0.0453876	0.163769	0.53552	0.854879	DDB_G0269224	fszB, products: mitochondrial cell division protein
904.122	-0.00432276	0.0863169	0.943015	0.986219	DDB_G0269226	cas1, products: cycloartenol synthase
521.195	-0.0163239	0.119027	0.810033	0.955791	DDB_G0269230	fpaA, products: ubiquitin ligase subunit SKP1
331.734	-0.0240984	0.102669	0.710752	0.932237	DDB_G0269232	DDB_G0269232, products: unknown
50892	-0.0198877	0.0722169	0.71957	0.934079	DDB_G0269234	act8, products: actin
214.668	0.00876982	0.130108	0.899216	0.978534	DDB_G0269236	rab7A, products: Rab GTPase
1366.72	0.0577582	0.106939	0.390085	0.77011	DDB_G0269238	rab11A, products: Rab GTPase
121.079	-0.00568658	0.135757	0.935032	0.985496	DDB_G0269240	racH, products: Rho GTPase
3494.24	-0.0163717	0.0736728	0.769995	0.945611	DDB_G0269242	fcsA, products: fatty acyl-CoA synthetase, long-chain-fatty-acid-CoA ligase
99.6107	0.0258778	0.172405	0.71528	0.932421	DDB_G0269244	atg6A, products: autophagy protein 6, autophagy protein Apg6 family protein
713.636	-0.00313186	0.0847942	0.958369	0.990478	DDB_G0269246	pyd2, products: dihydropyrimidinase
157.426	-0.0200056	0.12452	0.771286	0.945611	DDB_G0269248	cf45-1, products: component of the counting factor (CF) complex
1588.79	0.0269786	0.0801239	0.645064	0.904461	DDB_G0269250	pats1, products: LRRK family protein kinase Pats1
1276.45	0.0198364	0.0862427	0.743233	0.938816	DDB_G0269252	gefE, products: Ras guanine nucleotide exchange factor E
61.6251	0.802412	0.46082	0.000410154	0.00746636	DDB_G0269254	sigJ, products: unknown
112.603	-0.219243	0.226027	0.0378252	0.236898	DDB_G0269256	DDB_G0269256, products: AhpC/TSA family protein
45.618	0.0457295	0.173181	0.531544	0.852499	DDB_G0269258	DDB_G0269258_RTE, products: TRE3-C ORF2
47.1332	-0.264351	0.292111	0.0250695	0.180779	DDB_G0269260	DDB_G0269260, products: AhpC/TSA family protein
55.0005	0.0126544	0.165339	0.857603	0.969809	DDB_G0269262	rabT2, products: Rab GTPase
30.1567	0.312082	0.365151	0.0161796	0.134684	DDB_G0269264	DDB_G0269264_RTE, products: TRE3-C ORF2
60.9235	-0.137976	0.207199	0.122989	0.456695	DDB_G0269266	DDB_G0269266_RTE, products: TRE3-D ORF2
11.6013	0.0176459	0.216205	0.779086	0.946713	DDB_G0269268	DDB_G0269268_RTE, products: TRE3-D ORF1 fragment
76.2901	-0.17969	0.221053	0.0669152	0.336499	DDB_G0269270	DDB_G0269270, products: AhpC/TSA family protein
157.392	-0.10554	0.15443	0.18765	0.559815	DDB_G0269272	DDB_G0269272, products:
239.985	-0.196863	0.171165	0.0365638	0.231877	DDB_G0269274	dhak, products: dihydroxyacetone kinase
12.5193	-0.0514099	0.2319	0.435661	0.803071	DDB_G0269276	DDB_G0269276, products:
11.2932	0.112299	0.321491	0.106381	0.43076	DDB_G0269280	DDB_G0269280, products:
115.833	0.238165	0.23355	0.0296848	0.203288	DDB_G0269282	DDB_G0269282, products: ATP-dependent protease hslV
211.343	0.0528731	0.155196	0.474234	0.821996	DDB_G0269284	nkaP, products: nkaP family protein
417.867	-0.00606296	0.110983	0.927225	0.983671	DDB_G0269286	DDB_G0269286, products:
3002.87	0.0022334	0.0736912	0.96817	0.993656	DDB_G0269288	DDB_G0269288, products:
6667.67	0.0309825	0.0739774	0.581453	0.876161	DDB_G0269290	nap1, products: putative nucleosome assembly protein
1426.98	0.00675891	0.113019	0.91935	0.981856	DDB_G0269292	sugt1, products: TPR repeat-containing protein, SGS domain-contantaing protein
199.111	0.0697732	0.144663	0.350951	0.742553	DDB_G0269294	DDB_G0269294, products:
645.025	0.00597177	0.0991825	0.925571	0.983254	DDB_G0269298	gefX, products: RasGEF domain-containing protein, LISK family protein kinase, protein kinase, TKL group, tyrosine kinase-like protein
151.543	0.0390352	0.136087	0.583405	0.876689	DDB_G0269300	DDB_G0269300, products: CD2 antigen cytoplasmic tail-binding protein 2
54.4302	0.0733701	0.178588	0.341486	0.735468	DDB_G0269304	DDB_G0269304, products: SHQ1 family protein
39.1168	-0.0274629	0.176542	0.697955	0.928842	DDB_G0269306	dhx35, products: DEAD/DEAH box helicase
477.006	0.112701	0.118788	0.125238	0.461179	DDB_G0269312	DDB_G0269312, products: unknown
58.4976	-0.0121895	0.155267	0.863221	0.97033	DDB_G0269322	DDB_G0269322, products:
280.919	0.0157285	0.108906	0.811959	0.955791	DDB_G0269326	zplD, products: ZIP-like protein D
58.0565	-0.012058	0.168849	0.863818	0.97033	DDB_G0269328	DDB_G0269328, products:
458.097	0.112918	0.150765	0.160223	0.518762	DDB_G0269332	zntC, products: putative zinc transporter C
3380.54	0.0787488	0.114141	0.261152	0.657018	DDB_G0269334	DDB_G0269334, products: C2 calcium/lipid-binding (CaLB) region-containing protein, C2 calcium-dependent membrane targeting domain-containing protein
251.204	-0.0258087	0.12712	0.709914	0.932237	DDB_G0269336	DDB_G0269336, products:
46.1609	-0.0166137	0.171545	0.813274	0.956255	DDB_G0269338	bzpE, products: putative basic-leucine zipper (bZIP) transcription factor
188.156	-0.117931	0.161377	0.153394	0.509174	DDB_G0269340	DDB_G0269340, products: short-chain dehydrogenase/reductase (SDR) family protein
110.959	-0.0912774	0.308462	0.143193	0.492704	DDB_G0269342	DDB_G0269342, products: unknown
105.995	-0.0100062	0.153995	0.887431	0.975827	DDB_G0269344	DDB_G0269344, products: WD40 repeat-containing protein
93.4431	-0.0185064	0.137734	0.792185	0.95045	DDB_G0269348	DDB_G0269348, products: Probable tRNA (uracil-O(2)-)-methyltransferase
130.258	0.0152799	0.14539	0.828717	0.962534	DDB_G0269352	mcfD, products: mitochondrial substrate carrier family protein
190.182	0.0116627	0.118104	0.863161	0.97033	DDB_G0269354	DDB_G0269354, products: EGF-like domain-containing protein
21.3794	0.0101228	0.200169	0.878001	0.974369	DDB_G0269356	DDB_G0269356, products: Carbonyl reductase family member 4
88.2052	0.0468886	0.155301	0.52214	0.847336	DDB_G0269358	DDB_G0269358, products:
20.0892	-0.0140525	0.194077	0.834675	0.963709	DDB_G0269360	DDB_G0269360, products:
701.009	-0.025241	0.112139	0.706227	0.930813	DDB_G0269362	frmB, products: FERM domain-containing protein FrmB
682.97	-1.09288	0.153298	6.38518e-15	1.11728e-12	DDB_G0269364	stlA, products: polyketide synthase StlA
23.3084	0.00246284	0.196441	0.970424	0.994709	DDB_G0269368	DDB_G0269368, products: SYS1 family protein
109.613	0.0519373	0.159061	0.482374	0.825965	DDB_G0269370	DDB_G0269370, products: NUDIX hydrolase family protein, cleavage and polyadenylation specificity factor 5-like protein
915.74	-0.00630593	0.09188	0.919102	0.981856	DDB_G0269372	DDB_G0269372, products:
115.468	0.0508121	0.154229	0.490061	0.828917	DDB_G0269374	DDB_G0269374, products:
28.3673	-0.0628947	0.215844	0.381635	0.765875	DDB_G0269376	DDB_G0269376, products:
1265.8	-0.04063	0.0894052	0.511414	0.842362	DDB_G0269378	rad1, products: exonuclease, checkpoint clamp complex protein
1215.91	0.023446	0.0949544	0.710195	0.932237	DDB_G0269380	DDB_G0269380, products: P-type ATPase
2033.77	-0.108835	0.0972765	0.10301	0.42374	DDB_G0269382	pepD, products: peptidase D
437.506	-3.52237	0.19347	3.71201e-80	7.95669e-77	DDB_G0269388	corB, products: coronin 7
10.6782	-0.0554046	0.248212	0.381129	NA	DDB_G0269392	DDB_G0269392, products: AhpC/TSA family protein
77.3817	-0.104062	0.17687	0.205154	0.584577	DDB_G0269394	mcfE, products: mitochondrial substrate carrier family protein
24.6284	0.00441676	0.190776	0.947807	0.987928	DDB_G0269398	DDB_G0269398, products:
112.582	-0.052006	0.137824	0.472248	0.821476	DDB_G0269400	DDB_G0269400, products: cellular retinaldehyde-binding/triple function domain-containing protein
36.0538	-0.101551	0.22208	0.209569	0.590097	DDB_G0269404	dspA, products: dual-specificity protein phosphatase A
877.517	-0.114019	0.101044	0.0948791	0.40695	DDB_G0269406	rad52, products: putative DNA repair protein RAD52
10.9772	0.0232192	0.217477	0.713759	0.932319	DDB_G0269408	DDB_G0269408, products:
2560.64	0.0705637	0.122815	0.323153	0.719862	DDB_G0269410	DDB_G0269410, products: pyrroline-5-carboxylate reductase, PCA reductase
361.037	-0.117585	0.144191	0.140339	0.486957	DDB_G0269412	paf1, products: RNA polymerase II-associated factor 1
496.36	-0.243144	0.165786	0.0133636	0.11788	DDB_G0269414	ebp, products: putative 3-beta-hydroxysteroid-Delta(8),Delta(7)-isomerase
58.1841	0.0924135	0.187403	0.250594	0.646973	DDB_G0269416	rab32B, products: Rab GTPase
37.3112	-0.0342449	0.200955	0.616745	0.891355	DDB_G0269418	DDB_G0269418, products: osmotically inducible family protein
142.353	-0.102971	0.158579	0.199877	0.575891	DDB_G0269424	gxcB, products: pleckstrin homology (PH) domain-containing protein, RhoGEF domain-containing protein, calponin homology (CH) domain-containing protein
852.356	-0.0322879	0.091806	0.604894	0.886368	DDB_G0269426	rbdB, products: RNA-binding domain protein B
543.289	0.0276994	0.100151	0.667519	0.914619	DDB_G0269430	DDB_G0269430, products: Sel1-like protein
426.638	0.136912	0.134842	0.085201	0.385495	DDB_G0269432	DDB_G0269432, products: Sel1-like protein
377.418	0.337981	0.158768	0.00154291	0.023211	DDB_G0269438	zpr1, products: ZPR1-type zinc finger-containing protein
412.619	-0.0431788	0.104872	0.513491	0.844014	DDB_G0269440	DDB_G0269440, products: UPF0464 protein C15orf44
64.7987	0.0394981	0.166144	0.586252	0.8776	DDB_G0269442	DDB_G0269442, products: Cell division control protein 4
300.778	-0.00156175	0.110405	0.981193	0.995238	DDB_G0269444	hemB, products: porphobilinogen synthase
440.527	-0.0589169	0.112532	0.390042	0.77011	DDB_G0269448	DDB_G0269448, products:
19.8569	0.01106	0.194606	0.868991	0.971092	DDB_G0269450	DDB_G0269450, products:
25.1367	-0.00313476	0.191819	0.962833	0.992309	DDB_G0269452	DDB_G0269452, products:
238.44	0.106788	0.138982	0.169113	0.531918	DDB_G0269454	trpS, products: tryptophanyl-tRNA synthetase, tryptophan-tRNA ligase
1078.03	0.382773	0.151096	0.000437168	0.00785803	DDB_G0269458	ubqJ, products: ubiquitin J
4960.47	-0.127657	0.0849273	0.0417013	0.253579	DDB_G0269460	DDB_G0269460, products: Protein ELYS
2690.58	0.290854	0.105208	0.00030222	0.00588802	DDB_G0269462	DDB_G0269462, products: ubiquitin domain-containing protein
90.391	-0.0814577	0.1684	0.297592	0.69855	DDB_G0269464	DDB_G0269464, products:
259.874	-0.0666533	0.126999	0.354009	0.745922	DDB_G0269466	DDB_G0269466, products: BSD domain-containing protein
55.6409	-0.147971	0.233252	0.106502	0.43076	DDB_G0269470	mcfF, products: mitochondrial substrate carrier family protein, putative mitoferrin, putative mitochondrial iron transporter
154.273	0.304208	0.224065	0.0103596	0.0989022	DDB_G0269472	psmB2, products: proteasome subunit beta type 2
620.644	-0.259249	0.164229	0.00929266	0.0909535	DDB_G0269474	fcsB, products: fatty acyl-CoA synthetase
5293.71	0.123501	0.0910649	0.0576138	0.305492	DDB_G0269482	DDB_G0269482, products: unknown
339.577	0.00561598	0.112358	0.932825	0.98486	DDB_G0269486	DDB_G0269486, products:
215.192	-0.0300216	0.111941	0.6545	0.908775	DDB_G0269488	DDB_G0269488, products:
594.288	-0.479795	0.163805	0.00010347	0.00240422	DDB_G0269496	gacZ, products: MYND-type zinc finger-containing protein, RhoGAP domain-containing protein
37.9856	0.0231601	0.173607	0.742973	0.938816	DDB_G0269500	DDB_G0269500, products: transmembrane protein
165.12	-0.162631	0.171789	0.0707339	0.347549	DDB_G0269502	nup160, products: nucleoporin 160
2270.75	0.0162168	0.0741192	0.772837	0.945611	DDB_G0269510	vps37, products: Modifier of rudimentary (Modr) family protein
250.832	-0.120467	0.163134	0.147501	0.500266	DDB_G0269512	DDB_G0269512, products:
125.183	0.0241291	0.206177	0.714626	0.932319	DDB_G0269514	DDB_G0269514, products:
5985.14	-0.0485418	0.0830717	0.418003	0.790245	DDB_G0269518	abnB, products: actobindin B
1701.24	0.0560755	0.102222	0.395216	0.773861	DDB_G0269520	abnC, products: actobindin C
204.807	-0.137556	0.146798	0.0947764	0.406937	DDB_G0269522	DDB_G0269522, products:
94.1106	0.586606	0.361618	0.00116961	0.0186052	DDB_G0269526	argD, products: acetylornithine transaminase
89.424	-0.364764	0.308933	0.0083924	0.0849966	DDB_G0269532	DDB_G0269532, products:
25.4348	-0.0387981	0.192683	0.581484	0.876161	DDB_G0269544	act32, products: actin
517.639	-0.184521	0.126463	0.0228344	0.170705	DDB_G0269546	DDB_G0269546, products: C2 calcium-dependent membrane targeting domain-containing protein
56.3937	0.021071	0.169278	0.765908	0.944062	DDB_G0269548	limG, products: LIM-type zinc finger-containing protein
72.0697	0.119131	0.19146	0.163028	0.524111	DDB_G0269550	samm50, products: sorting and assembly machinery component 50 like protein
95.289	-0.101743	0.174899	0.212716	0.59273	DDB_G0269552	lsmd1, products: LSM domain-containing protein 1
593.454	-0.0774998	0.106443	0.254893	0.650433	DDB_G0269554	suvA, products: SET domain-containing protein, putative histone H3 lysine 9 methyltransferase
2015.33	0.0351627	0.0941312	0.577491	0.875116	DDB_G0269556	DDB_G0269556, products:
12.6773	-0.0713434	0.245729	0.301706	0.700723	DDB_G0269560	DDB_G0269560, products: endonuclease/exonuclease/phosphatase domain-containing protein
20.1255	-0.199396	0.343473	0.0463302	0.270412	DDB_G0269564	DDB_G0269564, products: unknown
156.264	-0.0422659	0.140513	0.556418	0.86519	DDB_G0269568	med7, products: putative mediator complex subunit 7
111.344	0.0557945	0.145735	0.447902	0.810551	DDB_G0269570	rabggta, products: protein geranylgeranyltransferase type II, Rab geranylgeranyltransferase alpha subunit
74.3347	-0.0536217	0.161237	0.46982	0.821136	DDB_G0269572	DDB_G0269572, products:
38.1101	-0.00291182	0.183758	0.966102	0.993216	DDB_G0269574	dcd3B, products: alkaline dihydroceramidase, N-acylsphingosine amidohydrolase
167.853	0.00814135	0.137456	0.907327	0.980689	DDB_G0269576	DDB_G0269576, products: FAD dependent oxidoreductase domain-containing protein
61.719	-0.0129493	0.160328	0.854716	0.968972	DDB_G0269580	DDB_G0269580, products:
814.634	0.00197963	0.088063	0.974109	0.994743	DDB_G0269582	DDB_G0269582, products:
27.3542	0.105729	0.240938	0.188089	0.560449	DDB_G0269584	DDB_G0269584, products:
453.424	-0.20874	0.150478	0.0210145	0.16174	DDB_G0269588	DDB_G0269588, products: Beta-ketoadipyl-CoA thiolase
189.646	0.0116867	0.121312	0.863858	0.97033	DDB_G0269590	DDB_G0269590, products: P-type ATPase, transmembrane protein
44.0316	0.0345051	0.173113	0.63054	0.898848	DDB_G0269592	DDB_G0269592, products:
347.208	0.218225	0.162335	0.0210658	0.16199	DDB_G0269594	DDB_G0269594, products:
20.6836	0.0250292	0.212563	0.698981	0.929431	DDB_G0269600	DDB_G0269600, products:
56.9527	0.0695607	0.171611	0.363343	0.752733	DDB_G0269602	slc35b2, products: solute carrier family 35 member B2
260.633	-0.284021	0.208703	0.0120137	0.109232	DDB_G0269608	DDB_G0269608, products: Glomulin
12024.6	-0.0924947	0.0709165	0.0958116	0.409516	DDB_G0269610	gxcT, products: putative Rac guanyl-nucleotide exchange factor T
8480.74	-0.00844143	0.0768923	0.882782	0.975702	DDB_G0269614	DDB_G0269614, products: RING zinc finger-containing protein, tetratricopeptide-like helical domain-containing protein (TPR)
34.4182	0.0619902	0.195733	0.40327	0.780152	DDB_G0269616	aplG, products: saposin B domain-containing protein
1582.87	0.146759	0.0978926	0.0325358	0.215957	DDB_G0269624	mgp3, products: RhoGAP domain-containing protein, Cdc15/Fes/CIP4 domain-containing protein
2132.37	-0.19396	0.101963	0.00759638	0.0787561	DDB_G0269626	forE, products: formin E
1250.52	0.371346	0.113515	4.65901e-05	0.00121418	DDB_G0269628	DDB_G0269628, products: NEK family protein kinase DDB_G0269628
603.368	0.118072	0.110247	0.0982745	0.413466	DDB_G0269630	iliI, products: TatD-related deoxyribonuclease, TatD-related DNase
1419.45	-0.0203655	0.080061	0.727687	0.936675	DDB_G0269632	irlD, products: putative protein serine/threonine kinase, IRE family protein kinase
768.88	0.258333	0.129053	0.00335527	0.0426827	DDB_G0269636	DDB_G0269636, products: EF-hand domain-containing protein, EPS15 homology (EH) domain-containing protein
406.091	0.123188	0.132209	0.112893	0.440577	DDB_G0269638	dr1, products: putative histone-like transcription factor
575.526	0.015506	0.106294	0.813107	0.956255	DDB_G0269640	DDB_G0269640, products: 39S ribosomal protein L24, mitochondrial
456.978	0.105031	0.121855	0.154386	0.51008	DDB_G0269642	mak16l, products: MAK16-like protein
70.6935	-0.328251	0.296034	0.0120663	0.109594	DDB_G0269644	DDB_G0269644, products:
74.2896	0.0296573	0.165841	0.678769	0.920752	DDB_G0269646	DDB_G0269646, products: Josephin domain-containing protein
26.4629	0.0450524	0.20505	0.517691	0.84498	DDB_G0269652	DDB_G0269652, products:
1967.33	-0.107852	0.0836391	0.0797915	0.373231	DDB_G0269664	DDB_G0269664, products:
418.265	-0.13704	0.174464	0.114795	0.445163	DDB_G0269668	DDB_G0269668, products:
10773.5	-0.094511	0.0736519	0.096567	0.410857	DDB_G0269670	DDB_G0269670, products: C2 domain-containing protein/WW domain-containing protein
28.6493	-0.0165096	0.191347	0.808073	0.95538	DDB_G0269676	DDB_G0269676, products: Putative methyltransferase NSUN3
141.848	0.137135	0.16648	0.110077	0.435222	DDB_G0269678	fuk, products: fucokinase
150.115	-0.0371261	0.145653	0.605525	0.886368	DDB_G0269680	DDB_G0269680, products: Integrin-alpha FG-GAP repeat-containing protein 2
11618.6	-0.0515154	0.0688518	0.340502	0.735203	DDB_G0269682	atxn2, products: ataxin-2
162.424	0.0998823	0.149256	0.20436	0.583508	DDB_G0269684	DDB_G0269684, products: unknown
565.546	-0.0404885	0.104501	0.538923	0.856727	DDB_G0269686	DDB_G0269686, products: WD40 repeat-containing protein
554.507	0.0270027	0.0983394	0.673217	0.917192	DDB_G0269688	sdad1, products: SDA1 domain-containing protein
136.963	0.119907	0.199859	0.162091	0.522862	DDB_G0269692	DDB_G0269692, products:
1099.39	-0.138557	0.11082	0.0570378	0.303753	DDB_G0269694	pan2, products: WD40-like domain-containing protein, peptidase C19 family protein, putative ubiquitin carboxyl-terminal hydrolase (UCH), putative exonuclease, polyA specific ribonuclease subunit
856.872	-0.0794856	0.119685	0.265607	0.661433	DDB_G0269696	pakD, products: serine/threonine protein kinase PakD
98.0586	0.108578	0.171112	0.187634	0.559815	DDB_G0269700	DDB_G0269700, products: RCC1 and BTB domain-containing protein 1
140.839	0.0651243	0.151585	0.38524	0.768819	DDB_G0269704	DDB_G0269704, products:
56.7377	-0.100307	0.198896	0.220326	0.605473	DDB_G0269706	DDB_G0269706, products:
8830.08	-0.112584	0.0761738	0.0539151	0.294251	DDB_G0269708	DDB_G0269708, products: WH2 domain-containing protein, SH3 domain-containing protein
1480.93	-0.0203679	0.0755945	0.71988	0.934112	DDB_G0269710	DDB_G0269710, products:
2106.7	0.16252	0.104235	0.0236978	0.174408	DDB_G0269712	ahsa, products: activator of Hsp90 ATPase family protein
183.81	0.516553	0.289831	0.00125234	0.0197382	DDB_G0269714	tdo, products: tryptophan 2,3-dioxygenase
694.111	0.0782252	0.0988091	0.235527	0.627731	DDB_G0269716	DDB_G0269716, products:
1648.01	-0.105254	0.101846	0.122268	0.455597	DDB_G0269718	DDB_G0269718, products:
27.8389	0.11159	0.257627	0.164183	0.526049	DDB_G0269720	abcB7, products: ABC transporter B family protein
216.38	0.117783	0.15211	0.146831	0.499167	DDB_G0269722	DDB_G0269722, products: methyltransferase
173.573	-0.138336	0.164147	0.106167	0.43076	DDB_G0269724	DDB_G0269724, products: Ubiquitin-conjugating enzyme E2 variant 1
83.2258	-0.117176	0.183339	0.166336	0.527427	DDB_G0269726	pggt1b, products: protein geranylgeranyltransferase type I
139.052	-0.0518465	0.144675	0.477867	0.823788	DDB_G0269728	ciao1, products: putative cytosolic iron-sulfur assembly protein
2229.67	-0.021444	0.0784601	0.711154	0.932237	DDB_G0269732	DDB_G0269732, products: DnaJ homolog subfamily C member 1
43.1762	0.0118502	0.163483	0.86666	0.970865	DDB_G0269736	DDB_G0269736, products:
286.528	0.126199	0.140241	0.113772	0.443197	DDB_G0269738	desA, products: dihydroceramide desaturase
634.101	0.0479262	0.0932802	0.448411	0.810942	DDB_G0269740	DDB_G0269740, products: putative cell surface glycoprotein
365.86	0.273169	0.176164	0.00893403	0.0886578	DDB_G0269742	cdsA, products: phosphatidate cytidylyltransferase
308.82	-0.0555826	0.113237	0.41722	0.790143	DDB_G0269744	DDB_G0269744, products:
21.5203	0.0191097	0.202861	0.772483	0.945611	DDB_G0269746	itpk1, products: inositol-tetrakisphosphate 1-kinase, inositol 1,3,4-Tri5Phosphate 5/6 Kinase
317.47	-0.0302275	0.147537	0.672473	0.916659	DDB_G0269750	DDB_G0269750, products:
399.855	-0.0190404	0.113238	0.776259	0.945937	DDB_G0269756	DDB_G0269756, products: enoyl-CoA hydratase/isomerase family protein
673.719	0.213436	0.157126	0.0213604	0.163376	DDB_G0269760	DDB_G0269760, products: BTB/POZ domain-containing protein, potassium channel tetramerization domain-containing protein
839.697	0.0323256	0.093916	0.607865	0.88697	DDB_G0269762	DDB_G0269762, products:
88.8412	0.275708	0.267309	0.020533	0.15961	DDB_G0269764	cnrC, products: putative cell number regulator
54.26	-0.00204756	0.164032	0.976777	0.994743	DDB_G0269766	DDB_G0269766, products: DUF423 family protein
5124.64	-0.0759073	0.0941824	0.238663	0.631964	DDB_G0269768	cnrI, products: SET domain-containing protein, putative cell number regulator
346.095	0.351032	0.212601	0.00431698	0.0520587	DDB_G0269770	fam63A, products: DUF544 family protein
77.6303	0.181821	0.250911	0.0670574	0.336622	DDB_G0269772	psmB3, products: proteasome subunit beta type 3, 20S proteasome subunit beta-3
125.488	0.0622277	0.150279	0.404045	0.7804	DDB_G0269776	DDB_G0269776, products:
118.283	-0.00645464	0.130219	0.92571	0.98328	DDB_G0269778	DDB_G0269778, products: cell differentiation family, Rcd1-like protein
340.073	-0.0804884	0.142655	0.287304	0.6877	DDB_G0269780	DDB_G0269780, products: Protein FAM160B1
61.4217	-0.0462212	0.177786	0.526186	0.849859	DDB_G0269782	DDB_G0269782, products: DnaJ homolog subfamily C member 25
36.6787	0.122408	0.236576	0.151046	0.505002	DDB_G0269784	DDB_G0269784, products: Uncharacterized Nudix hydrolase yfcD
508.053	0.0207387	0.0995296	0.746618	0.939951	DDB_G0269786	ccdc25, products: coiled-coil domain-containing protein 25
103.596	-0.153799	0.209371	0.0966813	0.410857	DDB_G0269788	DDB_G0269788, products: C-4 methyl sterol oxidase, methylsterol monooxygenase
1976.22	0.0338722	0.0744481	0.54828	0.862085	DDB_G0269790	gaa, products: alpha-glucosidase, alpha-glucoside hydrolase
190.158	-0.006053	0.114807	0.928075	0.983715	DDB_G0269800	DDB_G0269800, products: putative chromatin assembly factor 1 subunit B
35.2139	0.00618073	0.180656	0.928609	0.983715	DDB_G0269804	DDB_G0269804, products:
24.155	-0.0395445	0.197177	0.571442	0.872622	DDB_G0269812	DDB_G0269812, products:
223.924	0.0757408	0.13294	0.303993	0.702133	DDB_G0269814	ncbp1, products: initiation factor eIF-4 gamma middle domain-containing protein, nuclear cap-binding protein subunit 1
301.228	0.00158895	0.110128	0.980851	0.995019	DDB_G0269816	DDB_G0269816, products: kin17-like protein
75.1155	0.0731919	0.175695	0.34254	0.736445	DDB_G0269822	mhisS, products: histidine-tRNA ligase, histidyl-tRNA synthetase, putative mitochondrial histidyl-tRNA synthetase, putative mitochondrial histidine-tRNA ligase
67.9038	-0.0107106	0.161385	0.879439	0.974704	DDB_G0269824	DDB_G0269824, products:
580.707	-0.0194947	0.10082	0.762342	0.943007	DDB_G0269828	DDB_G0269828, products: Sjogrens syndrome scleroderma autoantigen 1 family protein
239.306	0.0300955	0.107504	0.649368	0.907056	DDB_G0269830	DDB_G0269830, products: Ribosomal RNA-processing protein 7
82.6116	0.0260191	0.150715	0.715396	0.932421	DDB_G0269832	DDB_G0269832, products:
64.4293	-0.00963994	0.166182	0.891047	0.976712	DDB_G0269834	DDB_G0269834, products:
90.5182	-0.0940436	0.168692	0.2402	0.633294	DDB_G0269838	DDB_G0269838, products:
159.248	-0.107739	0.146898	0.17367	0.537755	DDB_G0269840	DDB_G0269840, products: transmembrane protein
6363.14	-0.402915	0.112868	1.6105e-05	0.000486212	DDB_G0269842	DDB_G0269842, products: C2H2-type zinc finger-containing protein
197.466	0.485525	0.288346	0.00178316	0.0260356	DDB_G0269848	agpA, products: putative 1-acylglycerol-3-phosphate O-acyltransferase
2080.09	-0.0603256	0.0868523	0.326769	0.724146	DDB_G0269850	DDB_G0269850, products: putative transmembrane protein, DG1041 family protein
242.135	-0.0422714	0.136065	0.553819	0.864113	DDB_G0269854	amdhd1, products: imidazolonepropionase, amidohydrolase domain containing protein 1
18.6733	0.0376445	0.223688	0.559003	0.86643	DDB_G0269856	ddcA, products: group IV decarboxylase, Orn/DAP/Arg decarboxylase 2 domain-containing protein, putative diaminopimelate decarboxylase
271.01	0.125196	0.14107	0.117038	0.448784	DDB_G0269860	DDB_G0269860, products: importin beta family protein, putative importin 7
278.584	0.114525	0.141389	0.146586	0.498743	DDB_G0269864	DDB_G0269864, products: Small conductance calcium-activated potassium channel protein 3
168.061	0.0127921	0.120521	0.850917	0.968892	DDB_G0269874	DDB_G0269874, products:
66.2846	-0.0467372	0.160245	0.524161	0.847955	DDB_G0269876	samkA, products: SAM domain-containing protein, calcium-binding EF-hand domain-containing protein, SAMK family protein kinase
1689.93	0.0466119	0.107582	0.48558	0.827871	DDB_G0269878	fbl, products: fibrillarin, rRNA 2'-O-methyltransferase
8.42053	0.0286754	0.242465	0.615544	NA	DDB_G0269880	DDB_G0269880, products: CoA-transferase family III protein, CAIB/BAIF family protein
151.827	-0.000715925	0.123334	0.991641	0.998043	DDB_G0269884	DDB_G0269884, products:
134.173	0.134662	0.171712	0.118314	0.451225	DDB_G0269890	DDB_G0269890, products: YjeF N-terminal domain-containing protein
301.671	0.0318484	0.109905	0.633261	0.899245	DDB_G0269892	DDB_G0269892, products:
51.9446	0.13357	0.213686	0.131885	0.474123	DDB_G0269894	orcB, products: origin recognition complex subunit 2
40.9652	0.0752686	0.194272	0.32784	0.725019	DDB_G0269896	kcnma1, products: calcium-activated BK potassium channel, alpha subunit, calcium-activated potassium channel subunit alpha 1
572.164	-0.0290702	0.0951905	0.645895	0.904886	DDB_G0269898	DDB_G0269898, products:
15.5485	0.819558	0.926964	0.000439476	0.00788298	DDB_G0269902	act26, products: actin
300.077	-0.121473	0.169218	0.148479	0.501102	DDB_G0269906	gtf2h5, products: transcription initiation factor IIH5
161.051	0.155365	0.181678	0.0858694	0.387905	DDB_G0269908	DDB_G0269908, products: fatty acid hydroxylase, putative inositolphosphorylceramide-B hydroxylase, SCS7 family protein
1841.74	0.0684342	0.0906441	0.277513	0.675581	DDB_G0269910	DDB_G0269910, products: SH3 domain-containing protein
1178.02	-0.0683126	0.0839494	0.260183	0.655736	DDB_G0269912	redB, products: NADPH-cytochrome-P450 oxidoreductase
28.122	-0.0514211	0.207984	0.465576	0.819869	DDB_G0269914	tpp1, products: tripeptidyl-peptidase 1
31224.1	0.0251858	0.0754494	0.657282	0.910292	DDB_G0269916	atp5b, products: ATP synthase beta chain, mitochondrial
265.18	0.00675752	0.127237	0.921849	0.982662	DDB_G0269918	mpl1, products: leucine-rich repeat-containing protein (LRR), putative protein tyrosine phosphatase, dual specificity
9.3957	-0.00188004	0.235045	0.973293	NA	DDB_G0269920	DDB_G0269920, products:
493.252	-0.0463571	0.0936484	0.463844	0.819839	DDB_G0269922	xrn2, products: 5'-3' exoribonuclease, CCHC-type zinc finger-containing protein
1287.8	-0.00630872	0.0859985	0.916789	0.981856	DDB_G0269924	vps18, products: 7-fold repeat in clathrin and VPS proteins repeat-containing protein, Pep3/Vps18/deep orange domain-containing protein
1800.82	-0.0559445	0.0804577	0.343844	0.737651	DDB_G0269926	DDB_G0269926, products: RNA-binding region RNP-1 domain-containing protein, splicing factor PWI domain-containing protein
1150.38	-0.0842915	0.122627	0.24424	0.638848	DDB_G0269932	uap56, products: DEAD/DEAH box helicase, putative RNA splicing factor, ATP-dependent RNA helicase
14899.5	-0.389645	0.0976942	3.30916e-06	0.00011676	DDB_G0269934	DDB_G0269934, products: regulator of chromosome condensation (RCC1) domain-containing protein, RhoGEF domain-containing protein, Ras GTPase activation domain-containing protein
17.7909	0.0397519	0.220092	0.545136	0.860522	DDB_G0269936	DDB_G0269936, products:
30.5507	0.163458	0.294536	0.0778863	0.367736	DDB_G0269942	DDB_G0269942, products: vesicle-trafficking protein
344.103	-0.0393603	0.109769	0.556932	0.865374	DDB_G0269946	DDB_G0269946, products:
836.488	0.0259236	0.0990985	0.686313	0.923952	DDB_G0269948	tnpo, products: transportin
300.141	-0.0548113	0.11546	0.426542	0.797236	DDB_G0269950	serC, products: phosphoserine transaminase, phosphoserine aminotransferase
39.7156	0.0406083	0.184857	0.570407	0.871467	DDB_G0269952	DDB_G0269952, products: Protein fem-1 homolog B
28.2219	0.146339	0.250242	0.106681	0.430846	DDB_G0269956	DDB_G0269956_RTE, products: TRE3-C ORF2
15.0496	-0.125667	0.282393	0.12443	0.459458	DDB_G0269958	DDB_G0269958, products:
480.654	-0.0233675	0.0943935	0.710468	0.932237	DDB_G0269962	DDB_G0269962, products:
69.6687	0.0231351	0.159334	0.745461	0.939129	DDB_G0269964	DDB_G0269964, products: Uncharacterized membrane protein YCR023C
265.958	0.277964	0.172658	0.0075954	0.0787561	DDB_G0269966	ddx1, products: putative RNA helicase, DEAD/DEAH box helicase, SPla/RYanodine receptor SPRY domain-containing protein
138.639	0.232752	0.20992	0.0279063	0.194605	DDB_G0269968	DDB_G0269968, products: armadillo repeat-containing protein, ARM repeat-containing protein
569.95	0.0189474	0.11195	0.776553	0.945937	DDB_G0269972	sas10, products: U3 snoRNP protein, U3 small nucleolar ribonucleoprotein
161.601	0.000494857	0.1256	0.994248	0.998908	DDB_G0269976	DDB_G0269976, products:
605.934	-0.0108481	0.10011	0.865772	0.970865	DDB_G0269980	drpp30, products: RNase P protein subunit, RNase MRP protein subunit
257.682	-0.0485745	0.124147	0.488738	0.828641	DDB_G0269982	DDB_G0269982, products: TBC domain protein, putative Rab GTPase-activating protein
132.45	0.072174	0.165089	0.346896	0.740059	DDB_G0269986	DDB_G0269986, products:
42.2239	-0.389276	0.391916	0.00829608	0.0843929	DDB_G0269990	tbcE, products: tubulin binding cofactor E
399.436	0.0608298	0.126407	0.394083	0.77353	DDB_G0269992	DDB_G0269992, products:
471.708	0.0981935	0.11655	0.172239	0.53662	DDB_G0269994	DDB_G0269994, products: DDRGK domain-containing protein
408.296	0.0160544	0.0968258	0.800266	0.952569	DDB_G0269996	rnf10, products: RING zinc finger-containing protein
430.022	0.363478	0.185281	0.00203982	0.0289082	DDB_G0270006	jcdI, products: transcription factor jumonji, jmjC domain-containing protein
2577.36	0.447397	0.173501	0.000302848	0.00588802	DDB_G0270008	DDB_G0270008, products:
474.335	0.250279	0.200113	0.0191119	0.152008	DDB_G0270012	DDB_G0270012, products:
34.7719	-0.125238	0.257362	0.137768	0.483232	DDB_G0270014	DDB_G0270014, products:
139.299	-0.00153764	0.140637	0.9825	0.995504	DDB_G0270018	DDB_G0270018, products:
33.8927	0.122677	0.247842	0.146478	0.498571	DDB_G0270020	sf3a3, products: C2H2-type zinc finger-containing protein, splicing factor 3A subunit 3
61.8799	0.0503998	0.180786	0.49199	0.831113	DDB_G0270022	DDB_G0270022, products: cellular retinaldehyde-binding/triple function domain-containing protein
2282.72	-0.127067	0.115824	0.084459	0.383962	DDB_G0270024	mgp2, products: RhoGAP domain-containing protein, Cdc15/Fes/CIP4 domain-containing protein, PCH family protein
294.309	0.106686	0.133004	0.162805	0.523785	DDB_G0270026	DDB_G0270026, products:
273.875	0.197233	0.162764	0.0327141	0.216595	DDB_G0270028	DDB_G0270028, products: aldehyde dehydrogenase, putative NAD-dependent aldehyde dehydrogenase
40.3607	0.0518672	0.181298	0.480624	0.825329	DDB_G0270030	DDB_G0270030, products:
35.8877	-0.0143246	0.180436	0.836351	0.964807	DDB_G0270032	DDB_G0270032, products:
2086.92	-0.00202473	0.097668	0.974584	0.994743	DDB_G0270034	DDB_G0270034, products:
83.0103	0.0663812	0.161275	0.381076	0.765186	DDB_G0270036	ppp2r4, products: serine/threonine-protein phosphatase 2A regulatory subunit B', phosphotyrosyl phosphatase activator
46.693	-0.173643	0.254898	0.074475	0.359139	DDB_G0270038	DDB_G0270038, products:
107.819	0.0175768	0.137872	0.802341	0.952877	DDB_G0270040	DDB_G0270040, products: RAD50-interacting protein 1
1379.6	-0.0817498	0.0981725	0.214775	0.595756	DDB_G0270042	ascc3l, products: DEAD/DEAH box helicase, U5 small nuclear ribonucleoprotein 200 kDa helicase, Sec63 domain-containing protein
697.558	-0.0192167	0.100406	0.765275	0.943715	DDB_G0270044	DDB_G0270044, products:
80.7012	0.0456444	0.159374	0.533161	0.85314	DDB_G0270046	DDB_G0270046, products:
7.44848	-0.0191162	0.237804	0.736308	NA	DDB_G0270048	DDB_G0270048, products:
30.2684	-0.0748397	0.225665	0.308754	0.706771	DDB_G0270052	DDB_G0270052, products:
956.065	-0.0670815	0.105748	0.319319	0.717979	DDB_G0270056	DDB_G0270056, products:
119.803	1.66275	0.254983	1.99441e-12	2.59092e-10	DDB_G0270058	DDB_G0270058, products:
42.1368	0.682333	0.609528	0.0014789	0.0224029	DDB_G0270060	DDB_G0270060, products: carbohydrate-binding domain-containing protein
49.5868	-0.0116533	0.176345	0.867143	0.970865	DDB_G0270062	DDB_G0270062, products:
311.13	-0.501388	0.192004	0.000219837	0.0045323	DDB_G0270064	DDB_G0270064_RTE, products: TRE5-A ORF1
107.726	-0.0108494	0.130265	0.87559	0.973206	DDB_G0270066	DDB_G0270066, products:
1409.74	-0.196551	0.124252	0.0155695	0.131391	DDB_G0270068	DDB_G0270068, products:
297.189	0.109512	0.123595	0.141635	0.489865	DDB_G0270070	DDB_G0270070, products: phospholipase D
221.523	-0.04225	0.119407	0.540271	0.857661	DDB_G0270072	DDB_G0270072, products: coiled-coil domain-containing protein
849.775	-0.303014	0.126642	0.000885533	0.0147143	DDB_G0270074	DDB_G0270074, products: putative endoglycoceramidase
1379.81	1.11347	0.130549	1.05974e-19	2.52396e-17	DDB_G0270086	DDB_G0270086, products: lipocalin family protein
535.68	0.769219	0.140423	5.45503e-10	5.13971e-08	DDB_G0270088	DDB_G0270088, products:
403.088	0.0651579	0.111442	0.342517	0.736445	DDB_G0270096	DDB_G0270096, products:
5058.4	0.417112	0.0897266	2.03613e-07	9.86316e-06	DDB_G0270098	sqstm1, products: sequestosome-1
11.3873	0.0655034	0.271039	0.28162	0.68098	DDB_G0270100	DDB_G0270100, products:
736.406	0.011185	0.0879884	0.854539	0.968967	DDB_G0270102	mkcF, products: putative protein serine/threonine kinase, STE20 family protein kinase, SH3 domain-containing protein, protein kinase, STE group, MKC subfamily protein kinase
77.5588	0.00792995	0.150531	0.910562	0.981538	DDB_G0270104	DDB_G0270104, products: putative NADH dehydrogenase
1481.86	0.0385415	0.09539	0.544217	0.860046	DDB_G0270106	DDB_G0270106, products: Long-chain-fatty-acid--CoA ligase ACSBG2
84.7313	0.0324724	0.148406	0.650625	0.907546	DDB_G0270110	dhx33, products: DEAD/DEAH box helicase
419.549	0.0985245	0.120742	0.177128	0.543932	DDB_G0270112	DDB_G0270112, products:
8.78693	-0.115997	0.317143	0.108368	NA	DDB_G0270114	DDB_G0270114, products:
171.979	0.0119884	0.136076	0.863824	0.97033	DDB_G0270116	DDB_G0270116, products:
76.3069	0.012352	0.177467	0.85909	0.970189	DDB_G0270118	DDB_G0270118, products: putative protein phosphatase regulator
1019.28	0.0809376	0.0974364	0.217538	0.601415	DDB_G0270120	sdhB, products: succinate dehydrogenase (ubiquinone), succinic dehydrogenase, complex II, iron-sulfur protein (IP) subunit
168.79	-0.447888	0.263792	0.00216733	0.0303639	DDB_G0270122	rasW, products: Ras GTPase
180.378	-0.484862	0.284586	0.00172687	0.0254402	DDB_G0270124	rasX, products: Ras GTPase
61.3759	-0.805563	0.488982	0.000482061	0.00853965	DDB_G0270126	rasY, products: Ras GTPase
288.688	0.000158444	0.112383	0.998102	0.999679	DDB_G0270128	DDB_G0270128, products:
41.0042	0.0476676	0.180403	0.513552	0.844014	DDB_G0270130	DDB_G0270130, products: E3 ubiquitin-protein ligase RNF14
273.216	0.733832	0.188213	1.27369e-06	4.89715e-05	DDB_G0270132	DDB_G0270132, products:
21.5369	0.104839	0.260861	0.176891	0.543932	DDB_G0270134	DDB_G0270134, products:
30.9833	-1.36336	0.588134	3.68885e-05	0.00100089	DDB_G0270140	rasZ, products: Ras GTPase
126.743	0.0129566	0.135983	0.85298	0.968892	DDB_G0270146	DDB_G0270146, products: putative protein serine/threonine kinase, protein kinase, STE group
151.218	0.0511407	0.129808	0.472703	0.821996	DDB_G0270148	cpsf4, products: CCCH-type zinc finger-containing protein, cleavage and polyadenylation specificity factor 30 kDa subunit
196.956	-0.03898	0.133534	0.582376	0.876161	DDB_G0270150	cepF, products: centrosomal protein 103 kDa
257.769	0.106562	0.149368	0.179922	0.548336	DDB_G0270152	maspS, products: aspartyl-tRNA synthetase, aspartate-tRNA ligase, putative mitochondrial aspartyl-tRNA synthetase, putative mitochondrial aspartate-tRNA ligase
342.415	0.0252258	0.100826	0.696105	0.928014	DDB_G0270156	DDB_G0270156, products: RNA-binding protein 28
90.1639	0.0630254	0.157241	0.401709	0.778551	DDB_G0270168	DDB_G0270168, products:
7835.9	-0.0407528	0.0905119	0.512448	0.843488	DDB_G0270170	DDB_G0270170, products: BRD family protein kinase DDB_G0270170
38.2921	-0.00710032	0.17187	0.919107	0.981856	DDB_G0270174	aprt, products: adenine phosphoribosyltransferase
582.352	-0.387639	0.172142	0.000898559	0.0149018	DDB_G0270176	DDB_G0270176, products: protein phosphatase 2C, leucine-rich repeat-containing protein (LRR)
14.7299	-0.0812074	0.251765	0.254062	0.650053	DDB_G0270180	DDB_G0270180, products: Helper of Tim protein 13
37.7476	-0.0556803	0.191178	0.448125	0.810766	DDB_G0270182	DDB_G0270182, products:
159.808	0.0353624	0.132462	0.616118	0.891143	DDB_G0270184	ger, products: GDP-keto-6-deoxymannose 3,5- epimerase/4-reductase, FX protein, GDP-L-fucose synthase
377.805	0.204136	0.173799	0.0327449	0.21661	DDB_G0270188	psmD6, products: 26S proteasome non-ATPase regulatory subunit 6, 26S proteasome regulatory subunit S10
35.0949	-0.0188885	0.194167	0.780221	0.947269	DDB_G0270190	DDB_G0270190, products: putative cellulase, cellulose-binding domain-containing protein, glycoside hydrolase family 5 protein
29.9357	0.0870457	0.229083	0.254644	0.650416	DDB_G0270192	DDB_G0270192, products: DUF1624 family protein
87.2195	-0.0394519	0.168925	0.586266	0.8776	DDB_G0270194	DDB_G0270194, products: DUF866 family protein
279.804	0.053629	0.115637	0.436381	0.803071	DDB_G0270196	DDB_G0270196, products: putative mitochondrial import inner membrane translocase subunit 50, NIF domain-containing protein
177.022	0.00559259	0.133602	0.935922	0.985943	DDB_G0270200	DDB_G0270200, products: BRCA1-associated protein
43.9812	0.00485843	0.162634	0.945003	0.987021	DDB_G0270202	DDB_G0270202, products: Pre-rRNA-processing protein TSR2 homolog
111.168	0.0215279	0.158147	0.762306	0.943007	DDB_G0270204	crtp3, products: putative transmembrane protein, chloroquine resistance transporter-like protein
122.46	-0.0453875	0.144619	0.531144	0.852336	DDB_G0270206	DDB_G0270206, products:
11.3429	-0.127486	0.341909	0.0779133	0.367736	DDB_G0270210	cbpJ, products: calcium-binding protein, NCS-1/frequenin-related protein
951.269	-0.110912	0.120954	0.133661	0.476707	DDB_G0270212	DDB_G0270212, products: galactose-binding domain-containing protein
925.445	0.01383	0.103043	0.831179	0.962727	DDB_G0270214	DD7-1, products: galactose-binding domain-containing protein
979.827	-0.00164592	0.0936503	0.979005	0.994743	DDB_G0270220	DDB_G0270220, products: Ankyrin repeat and protein kinase domain-containing protein 1
26.925	-0.0331494	0.18963	0.635723	0.900791	DDB_G0270228	gtpbp3, products: GTP-binding protein 3, putative tRNA modification GTPase 3
82.6295	0.0228361	0.166748	0.747836	0.940163	DDB_G0270230	utp11, products: U3 snoRNP protein, U3 small nucleolar ribonucleoprotein
51.7692	0.103284	0.199377	0.210261	0.59088	DDB_G0270232	DDB_G0270232, products:
4003.86	-0.0538573	0.0993964	0.408259	0.783606	DDB_G0270238	DDB_G0270238, products:
15.4648	-0.0359308	0.206725	0.595455	0.882214	DDB_G0270242	DDB_G0270242, products:
64.2642	-0.0165177	0.157303	0.815834	0.957558	DDB_G0270246	DDB_G0270246, products: regulator of chromosome condensation (RCC1) domain-containing protein
48.839	-0.126279	0.225256	0.145735	0.496832	DDB_G0270248	aplR, products: amoebapore-like protein R
26.6057	0.0441042	0.187758	0.538977	0.856727	DDB_G0270250	DDB_G0270250, products:
26.7666	0.0277623	0.182474	0.69254	0.927081	DDB_G0270252	DDB_G0270252, products:
8.68214	-0.0143696	0.234484	0.801697	NA	DDB_G0270256	DDB_G0270256, products:
2642.3	0.0102774	0.0786119	0.859122	0.970189	DDB_G0270260	nhp6, products: HMG1/2 (high mobility group) box-containing protein
1246.49	0.0195751	0.0886256	0.749384	0.940476	DDB_G0270264	metap2, products: methionine aminopeptidase 2
286.168	-0.00650738	0.125996	0.924561	0.982965	DDB_G0270266	DDB_G0270266, products: Protein DBF4
647.364	-0.0251029	0.10591	0.702467	0.929503	DDB_G0270270	gpsn2, products: synaptic glycoprotein SC2-like protein
2983.5	0.21456	0.116417	0.00713456	0.0752027	DDB_G0270272	uae1, products: ubiquitin activating enzyme E1
217.988	0.263407	0.206172	0.0163712	0.136146	DDB_G0270276	DDB_G0270276, products:
348.942	0.0280412	0.110833	0.674662	0.918067	DDB_G0270278	DDB_G0270278, products:
170.581	-0.151336	0.180061	0.0914369	0.400899	DDB_G0270296	dcd1A, products: acid ceramidase-like protein, acid N-acylsphingosine amidohydrolase-like protein
1217.28	0.108852	0.110462	0.124919	0.460588	DDB_G0270298	pctA, products: phosphoethanolamine-cytidyltransferase, cytidylyltransferase domain-containing protein
21.8448	-0.065763	0.230155	0.349549	0.741793	DDB_G0270300	DDB_G0270300, products:
50.9283	0.014402	0.168288	0.838	0.96481	DDB_G0270304	DDB_G0270304, products:
91.4537	-0.0882206	0.171943	0.266439	0.662736	DDB_G0270306	DDB_G0270306, products: putative transcriptional regulator
38.2095	0.239471	0.295252	0.033422	0.218581	DDB_G0270310	DDB_G0270310, products:
49.8185	-0.00892474	0.172628	0.898407	0.978534	DDB_G0270312	DDB_G0270312, products: GNS1/SUR4 family protein, very long chain fatty acid elongase
336.038	0.0566669	0.118128	0.415383	0.787941	DDB_G0270314	crip, products: LIM-type zinc finger-containing protein, cysteine-rich protein
23117.1	0.00556483	0.0937292	0.929139	0.983805	DDB_G0270316	rpsA, products: 40S ribosomal protein SA
594.179	-0.0789298	0.117212	0.264986	0.660874	DDB_G0270320	nup54, products: nucleoporin 54
93.6151	0.0464468	0.152352	0.525078	0.849116	DDB_G0270322	DDB_G0270322, products: leucine-rich repeat-containing protein (LRR)
56.7627	0.100963	0.200547	0.217868	0.601803	DDB_G0270324	DDB_G0270324, products: NDR family protein
16.0338	-0.131803	0.306829	0.102224	0.421986	DDB_G0270328	DDB_G0270328, products: unknown
15.536	-0.151366	0.332946	0.0728344	0.353614	DDB_G0270330	DDB_G0270330, products: unknown
595.705	0.0151529	0.0966588	0.811109	0.955791	DDB_G0270336	ipo4, products: importin 4
56.1972	0.00194703	0.177414	0.977584	0.994743	DDB_G0270338	hdaB, products: histone deacetylase family protein, type-1 histone deacetylase
142.356	-0.582672	0.276366	0.000464937	0.00827049	DDB_G0270340	rapC, products: Ras GTPase RapC
102.887	-0.0701273	0.15367	0.354571	0.745996	DDB_G0270344	DDB_G0270344, products:
120.236	-0.0228198	0.129242	0.742767	0.938816	DDB_G0270346	mybW, products: myb domain-containing protein
1084.5	-0.200078	0.119762	0.0123252	0.111356	DDB_G0270352	DDB_G0270352, products: Protein aidB
181.65	-0.0512623	0.1627	0.488087	0.828641	DDB_G0270356	erg2, products: C-8 sterol isomerase
787.67	0.722202	0.121785	5.55927e-11	6.19028e-09	DDB_G0270358	DDB_G0270358, products: UBX domain-containing protein 7
89.1163	-0.0359325	0.145175	0.616574	0.891335	DDB_G0270360	bud31, products: putative RNA splicing factor, putative transcription factor
95.6711	0.0246614	0.150207	0.72929	0.936958	DDB_G0270362	zfand, products: AN1-type zinc finger protein
15.603	-0.19906	0.41218	0.0302484	0.206163	DDB_G0270366	DDB_G0270366, products: unknown
16.913	-0.0455821	0.231355	0.479842	0.825144	DDB_G0270368	DDB_G0270368, products: unknown
15.4737	-0.378945	0.584798	0.00566408	0.0633707	DDB_G0270376	DDB_G0270376, products: hssA/2C/7E family protein
441.25	-0.0495348	0.111986	0.465907	0.819928	DDB_G0270378	DDB_G0270378, products: TPR repeat-containing protein, TTC39 family protein, tetratricopeptide repeat protein 39
15444.5	-0.0326004	0.104472	0.61932	0.893045	DDB_G0270380	rpl30, products: S60 ribosomal protein L30
445.384	0.144047	0.141066	0.0778703	0.367736	DDB_G0270382	DDB_G0270382, products:
17.5082	0.136785	0.282805	0.109358	0.433972	DDB_G0270384	tsn, products: translin
130.861	0.0448794	0.153497	0.538606	0.856727	DDB_G0270386	DDB_G0270386, products: Selenocysteine-specific elongation factor
59871	0.00264561	0.0697063	0.961104	0.991756	DDB_G0270388	DDB_G0270388, products: ubiquitin system component Cue domain containing protein
308.786	0.438638	0.219361	0.00125146	0.0197382	DDB_G0270390	DDB_G0270390, products:
198.209	-0.0378878	0.121333	0.583437	0.876689	DDB_G0270392	cpsf2, products: beta-lactamase domain-containing protein, DNA repair metallo-beta-lactamase domain-containing protein, cleavage and polyadenylation specificity factor 100 kDa subunit
26.594	0.0334795	0.189766	0.63249	0.899087	DDB_G0270396	ddx49, products: putative RNA helicase, DEAD/DEAH box helicase
1032.01	0.00198734	0.0787692	0.972639	0.994743	DDB_G0270398	raptor, products: Raptor family protein
319.764	-0.0174972	0.107996	0.790827	0.949809	DDB_G0270400	DDB_G0270400, products:
129.469	0.0781467	0.160706	0.311992	0.709661	DDB_G0270402	DDB_G0270402, products: unknown
2012.17	-0.283157	0.131811	0.00194286	0.027884	DDB_G0270404	docB, products: DOCK family protein, putative guanine nucleotide exchange factor (GEF)
46.3453	-0.137443	0.254087	0.118802	0.45153	DDB_G0270406	eIF4e3, products: eukaryotic translation initiation factor 4E member 3
91.778	0.0535055	0.169059	0.471018	0.821184	DDB_G0270408	DDB_G0270408, products:
6437.26	-0.0936689	0.0768746	0.108297	0.432282	DDB_G0270410	stcB, products: PHD zinc finger-containing protein, SET domain-containing protein
651.214	-0.0627133	0.0993624	0.33806	0.73353	DDB_G0270412	DDB_G0270412, products: unknown
123.688	-0.145864	0.180827	0.101037	0.420124	DDB_G0270416	DDB_G0270416, products: peptidase C19 family protein, putative ubiquitin carboxyl-terminal hydrolase (UCH)
999.586	0.0976513	0.104336	0.154053	0.509589	DDB_G0270418	top2, products: DNA topoisomerase II
384.899	-0.0504349	0.125447	0.474332	0.821996	DDB_G0270420	DDB_G0270420, products: sucraseferredoxin-like family protein
21201.7	-0.0542278	0.113714	0.428847	0.800146	DDB_G0270424	rpl35a, products: S60 ribosomal protein L35a
18.6563	-0.0174862	0.222159	0.775515	0.945611	DDB_G0270428	DDB_G0270428, products:
4937.59	-0.369209	0.120798	9.51559e-05	0.00227896	DDB_G0270430	wipA, products: WH2 domain-containing protein
114.491	0.00861382	0.131796	0.901253	0.979013	DDB_G0270432	DDB_G0270432, products:
1623.72	-0.107721	0.0900799	0.0928994	0.404325	DDB_G0270434	med23, products: putative mediator complex subunit 23
1204.07	-1.24855	0.160185	9.18837e-17	1.83212e-14	DDB_G0270436	DDB_G0270436, products:
461.126	0.0446711	0.0986927	0.489352	0.828688	DDB_G0270438	DDB_G0270438, products: putative transmembrane protein
26.926	0.0882003	0.216522	0.25861	0.65427	DDB_G0270442	polA3, products: DNA polymerase alpha primase subunit, DNA primase large subunit
1971.12	-0.0230191	0.0976119	0.718097	0.933634	DDB_G0270444	DDB_G0270444, products: putative protein serine/threonine kinase, WD40 repeat-containing protein, protein kinase, CMGC group
500.294	0.000682389	0.0959075	0.991374	0.998043	DDB_G0270446	DDB_G0270446, products: Cell cycle regulator Mat89Bb homolog
519.309	-0.0423236	0.104525	0.521152	0.847058	DDB_G0270450	DDB_G0270450, products: RNA-binding region RNP-1 domain-containing protein, RNA recognition motif-containing protein RRM
23.0018	-0.190812	0.319035	0.0544165	0.295458	DDB_G0270452	DDB_G0270452, products: cyclin-like F-box containing protein
70.4518	-0.00198417	0.141093	0.977429	0.994743	DDB_G0270458	DDB_G0270458_RTE, products: TRE3-C ORF2
231.386	-0.168091	0.161402	0.0581586	0.307479	DDB_G0270462	DDB_G0270462_RTE, products: TRE5-A ORF1
291.323	-0.19491	0.160922	0.0334748	0.218655	DDB_G0270464	DDB_G0270464_RTE, products: TRE5-A ORF2
98.9551	-0.0218117	0.159403	0.759284	0.942909	DDB_G0270470	DDB_G0270470, products: tetratricopeptide TPR-1 repeat-containing protein
27.0432	0.0465557	0.192391	0.515999	0.844357	DDB_G0270472	DDB_G0270472, products: IPT/TIG domain-containing protein, FYVE-type zinc finger-containing protein
665.064	0.00263294	0.0899845	0.96588	0.993216	DDB_G0270480	DDB_G0270480, products:
263.751	0.0411546	0.110498	0.540465	0.857661	DDB_G0270482	gfm1, products: mitochondrial translation elongation factor G
7394.29	-0.0583	0.0788205	0.318964	0.717606	DDB_G0270488	DDB_G0270488, products:
10.8423	-0.00415308	0.227705	0.943534	0.986219	DDB_G0270492	DDB_G0270492, products:
74.5318	0.0133452	0.16286	0.850199	0.968892	DDB_G0270496	DDB_G0270496, products: TRAUB family protein
358.956	0.015137	0.112167	0.820517	0.959244	DDB_G0270500	d2hgdh, products: D-2-hydroxyglutarate dehydrogenase
543.153	-0.706468	0.131789	1.67549e-09	1.42234e-07	DDB_G0270502	DDB_G0270502_RTE, products: TRE5-A ORF1
218.562	-0.209114	0.204316	0.0393574	0.244529	DDB_G0270504	DDB_G0270504_RTE, products: TRE5-A ORF1
31.4252	-0.204443	0.30135	0.0491066	0.27865	DDB_G0270506	DDB_G0270506, products:
23.095	0.0161542	0.211438	0.800474	0.952569	DDB_G0270510	spc2, products: microsomal signal peptidase subunit, signal peptidase complex subunit 2
118.266	0.10904	0.183523	0.19053	0.56397	DDB_G0270518	DDB_G0270518, products: unknown
193.306	0.232352	0.191123	0.0236556	0.17431	DDB_G0270522	DDB_G0270522, products:
847.522	-0.619605	0.117426	5.10762e-09	3.74297e-07	DDB_G0270536	DDB_G0270536_RTE, products: TRE5-A ORF1
221.239	-0.0515134	0.130495	0.470275	0.821136	DDB_G0270538	DDB_G0270538, products:
15.9604	-0.0234082	0.21333	0.715918	0.932445	DDB_G0270540	DDB_G0270540, products:
200.315	0.00882487	0.124518	0.897582	0.978534	DDB_G0270544	gdt6, products: MLK family protein kinase Gdt6
129.211	-0.128538	0.168342	0.130196	0.469626	DDB_G0270550	gdt4, products: MLK family protein kinase Gdt4
360.985	0.0880539	0.125646	0.229765	0.619694	DDB_G0270552	DDB_G0270552, products: C2H2-type zinc finger-containing protein
36.8814	-0.104023	0.23184	0.197653	0.57272	DDB_G0270554	DDB_G0270554, products:
1512.82	-0.0783033	0.090726	0.216503	0.599556	DDB_G0270560	mybP, products: myb domain-containing protein
465.628	0.220581	0.173768	0.0238201	0.174708	DDB_G0270562	acy1, products: N-acyl-L-amino-acid amidohydrolase, aminoacylase
19.2775	0.000753442	0.200396	0.99084	0.997823	DDB_G0270564	DDB_G0270564, products:
60.7925	-0.139296	0.210888	0.120872	0.454145	DDB_G0270566	DDB_G0270566, products: DDHD domain-containing protein
207.327	-0.459753	0.281413	0.00226584	0.0314358	DDB_G0270568	DDB_G0270568, products: C3HC4-type zinc finger-containing protein
244.754	0.23898	0.183296	0.0190992	0.152008	DDB_G0270572	pks2, products: putative polyketide synthase, beta-ketoacyl synthase family protein
101.729	0.00976977	0.140205	0.889271	0.976387	DDB_G0270578	DDB_G0270578, products:
7.43107	-0.134095	0.407248	0.0264211	NA	DDB_G0270584	DDB_G0270584, products:
16.1766	-0.110181	0.280948	0.149883	0.502973	DDB_G0270586	DDB_G0270586, products:
8440.54	-0.345782	0.103525	3.76583e-05	0.00101535	DDB_G0270590	DDB_G0270590, products: fungal transcriptional regulatory protein, N-terminal domain-containing protein, putative zinc cluster transcription factor
24.1183	-0.0661509	0.245427	0.326728	0.724146	DDB_G0270592	DDB_G0270592, products:
20.5826	0.0164539	0.20557	0.800982	0.952877	DDB_G0270596	DDB_G0270596, products:
9.29858	-0.0590167	0.260736	0.334662	NA	DDB_G0270598	DDB_G0270598, products:
427.96	-0.114842	0.129332	0.132381	0.474861	DDB_G0270606	DDB_G0270606, products:
129.63	0.221877	0.209233	0.0330719	0.217573	DDB_G0270618	DDB_G0270618, products: WD-40 repeat-containing protein
59.2065	-0.0575373	0.167287	0.441601	0.807654	DDB_G0270622	DDB_G0270622, products:
296.354	-0.0380763	0.12883	0.587692	0.878158	DDB_G0270626	armc8, products: armadillo repeat-containing protein
51.9147	0.0238862	0.167791	0.736756	0.937377	DDB_G0270632	DDB_G0270632, products:
3872.65	-0.0585939	0.0822074	0.327273	0.7247	DDB_G0270634	DDB_G0270634, products: RNA-binding region RNP-1 domain-containing protein, RNA recognition motif-containing protein RRM, putative splicing regulator
23.1722	-0.0726164	0.227907	0.317101	0.715668	DDB_G0270636	DDB_G0270636, products: transmembrane protein
44.7461	0.0418008	0.16859	0.565668	0.869792	DDB_G0270638	DDB_G0270638_RTE, products: TRE5-B ORF1
829.457	-0.0422551	0.0950919	0.506268	0.839329	DDB_G0270640	DDB_G0270640, products: putative spindle pole body-interacting protein
26.3437	-0.101437	0.255137	0.189536	0.562507	DDB_G0270642	DDB_G0270642, products:
67.5985	-0.049735	0.172537	0.499484	0.835509	DDB_G0270644	DDB_G0270644, products:
17.9079	0.136191	0.282587	0.110202	0.435222	DDB_G0270646	DDB_G0270646, products:
41.3754	0.0209758	0.166019	0.767463	0.944891	DDB_G0270648	DDB_G0270648_RTE, products: TRE3-C ORF2
30.6511	-0.116194	0.239118	0.163607	0.524948	DDB_G0270650	DDB_G0270650_RTE, products: TRE3-C ORF2
2020.62	-0.0355545	0.104319	0.588281	0.878579	DDB_G0270658	acbA, products: acyl-CoA binding protein AcbA
21.7706	-0.0620445	0.205893	0.395769	0.773992	DDB_G0270664	DDB_G0270664, products: UPF0557 family protein
603.891	-0.173777	0.152611	0.0468096	0.27173	DDB_G0270666	gdt2, products: MLK family protein kinase Gdt2
1140.12	-0.0680563	0.083122	0.25949	0.654853	DDB_G0270668	gdt8, products: MLK family protein kinase Gdt8
1002.53	0.534343	0.167083	3.82168e-05	0.00102515	DDB_G0270670	psaB, products: puromycin-sensitive aminopeptidase-like protein, metallopeptidase
668.149	-0.14885	0.121295	0.052534	0.289106	DDB_G0270678	samkC, products: SAM domain-containing protein, SAMK family protein kinase
264.842	-0.00760112	0.134921	0.913173	0.981856	DDB_G0270686	DDB_G0270686, products:
38.6617	-0.0190528	0.180842	0.784313	0.948386	DDB_G0270690	DDB_G0270690, products:
436.982	0.0403002	0.118134	0.557268	0.86543	DDB_G0270692	DDB_G0270692, products: ankyrin repeat-containing protein
54.4225	0.0456567	0.173465	0.532077	0.852715	DDB_G0270694	DDB_G0270694, products: stomatin-like protein
158.261	-0.00386361	0.135909	0.95583	0.990024	DDB_G0270698	cniA, products: cornichon family protein
53.6795	0.0426948	0.187293	0.551093	0.864003	DDB_G0270700	DDB_G0270700, products: calcium-binding EGF domain-containing protein
131.945	-0.104193	0.166707	0.200378	0.57613	DDB_G0270708	DDB_G0270708, products: EGF-like domain-containing protein
250.756	-0.00688051	0.118299	0.91897	0.981856	DDB_G0270718	DDB_G0270718, products: EGF-like domain-containing protein
11.6446	-0.219347	0.450302	0.0201521	0.157445	DDB_G0270722	DDB_G0270722, products:
1376.59	0.710253	0.164717	2.73076e-07	1.28719e-05	DDB_G0270726	uduC, products: pyridoxal phosphate-dependent decarboxylase family protein
45.5341	0.0389194	0.18526	0.585078	0.8776	DDB_G0270730	fslB, products: frizzled and smoothened-like protein B
240.056	-0.0138995	0.107174	0.832549	0.962727	DDB_G0270734	DDB_G0270734, products:
26.971	-0.0617115	0.217569	0.38698	0.768819	DDB_G0270738	DDB_G0270738, products: Mitochondrial inner membrane protease ATP23 homolog
2288.02	0.16505	0.106913	0.0237362	0.17442	DDB_G0270742	DDB_G0270742, products: unknown
511.422	0.0545005	0.103434	0.410336	0.785142	DDB_G0270744	DDB_G0270744, products: Rab GTPase domain-containing protein
391.531	0.259689	0.202955	0.0168203	0.138538	DDB_G0270746	DDB_G0270746, products: WD40 repeat-containing protein
166.466	0.857404	0.265573	8.10338e-06	0.000267225	DDB_G0270750	DDB_G0270750, products: Kelch repeat-containing protein
332.792	0.0242238	0.106945	0.713224	0.932319	DDB_G0270752	DDB_G0270752, products: cytochrome b5 domain-containing protein
372.338	-0.0774345	0.112074	0.265228	0.660996	DDB_G0270754	vps16, products: Vacuolar protein sorting-associated protein 16 homolog
12.583	-0.113969	0.278335	0.145408	0.495913	DDB_G0270756	gtaG, products: putative GATA-binding transcription factor G
14.2511	-0.0384908	0.224762	0.549785	0.86287	DDB_G0270758	DDB_G0270758, products:
2413.63	-0.170496	0.08687	0.00870958	0.0870348	DDB_G0270760	DDB_G0270760, products: unknown
26.5265	-0.050573	0.210602	0.469163	0.821136	DDB_G0270762	fimD, products: fimbrin-4
56.3236	-0.00627947	0.168866	0.928643	0.983715	DDB_G0270764	myh, products: A/G-specific adenine DNA glycosylase Myh
149.182	0.229163	0.196819	0.0264975	0.187296	DDB_G0270766	DDB_G0270766, products: short-chain dehydrogenase/reductase (SDR) family protein
12.9752	-0.0191471	0.226458	0.750924	0.940796	DDB_G0270770	DDB_G0270770_RTE, products: TRE3-A ORF2
262.567	0.122814	0.164795	0.142301	0.49118	DDB_G0270772	DDB_G0270772, products:
188.358	-0.332552	0.209948	0.0055663	0.0625619	DDB_G0270774	DDB_G0270774, products:
331.252	0.00984345	0.118302	0.884347	0.975702	DDB_G0270776	DDB_G0270776, products: DUF255 family protein
167.439	0.473072	0.265974	0.00160873	0.0239051	DDB_G0270778	DDB_G0270778, products: putative prolyl 4-hydroxylase alpha subunit
1672.46	0.404133	0.138108	0.000132418	0.00299565	DDB_G0270784	psmC1, products: 26S proteasome ATPase 1 subunit, 26S protease regulatory subunit 4, TAT binding protein alpha
36.0686	-0.00393038	0.177278	0.954792	0.990024	DDB_G0270786	DDB_G0270786, products:
36.9623	-0.0103706	0.188899	0.878749	0.974541	DDB_G0270792	DDB_G0270792_RTE, products: TRE3-A ORF2
519.447	-0.0325855	0.108769	0.62435	0.895583	DDB_G0270800	DDB_G0270800, products:
20.6127	-0.152575	0.310667	0.0818417	0.376906	DDB_G0270802	DDB_G0270802, products:
169.625	0.144696	0.17761	0.101625	0.421017	DDB_G0270806	ldhd, products: D-lactate dehydrogenase (cytochrome)
479.405	-0.0255754	0.117676	0.70667	0.930979	DDB_G0270808	scy2, products: SCY1 family protein kinase
127.276	0.0402763	0.130155	0.568012	0.87011	DDB_G0270814	nek2, products: NEK family protein kinase Nek2
284.347	0.155746	0.149975	0.0666334	0.336265	DDB_G0270816	DDB_G0270816, products: Zinc finger CCCH domain-containing protein 14
34.6128	-0.116232	0.2675	0.148777	0.501102	DDB_G0270818	sdhaf1B, products: putative mitochondrial succinate dehydrogenase assembly factor 1B
93.0677	0.274429	0.24629	0.0189878	0.151443	DDB_G0270824	DDB_G0270824_TE, products: Tdd-4 - thugS fusion fragment
325.184	-0.246439	0.163461	0.0119389	0.108807	DDB_G0270826	abcG22, products: ABC transporter G family protein
60.545	-0.0567615	0.169405	0.44714	0.810551	DDB_G0270828	DDB_G0270828, products: unknown
81.0827	0.0181362	0.150693	0.798201	0.952569	DDB_G0270830	bopA, products: unknown
616.524	0.0726827	0.114742	0.298052	0.69855	DDB_G0270834	sgmA, products: sphingomyelinase A
128.596	-0.0497683	0.140854	0.492407	0.831245	DDB_G0270836	fbp, products: D-fructose-1,6-bisphosphate 1-phosphohydrolase, fructose-1,6-bisphosphatase
160.753	0.0420669	0.164763	0.563766	0.868283	DDB_G0270838	H3b, products: histone H3
270.707	-0.321116	0.202815	0.00601248	0.066111	DDB_G0270840	DDB_G0270840_RTE, products: TRE5-A ORF1
845.935	-0.628774	0.124439	1.51601e-08	9.92235e-07	DDB_G0270842	DDB_G0270842_RTE, products: TRE5-A ORF1
84.5322	0.0160111	0.155512	0.821344	0.95969	DDB_G0270850	DDB_G0270850, products:
18.5756	-0.0247503	0.197099	0.715037	0.932421	DDB_G0270852	DDB_G0270852_RTE, products: TRE3-C ORF2
65.143	0.0163939	0.186328	0.811436	0.955791	DDB_G0270854	nif3, products: protein NIF3
143.471	0.0561917	0.139227	0.440631	0.806698	DDB_G0270856	DDB_G0270856, products: RabGAP/TBC domain-containing protein, GRAM domain-containing protein
105.168	0.045934	0.158585	0.530649	0.852336	DDB_G0270858	DDB_G0270858, products: regulator of G protein signalling (RGS) domain-containing protein
671.237	-0.158781	0.114884	0.0352429	0.225885	DDB_G0270860	DDB_G0270860_RTE, products: TRE5-A ORF2
634.475	-0.477004	0.133639	1.44218e-05	0.000443198	DDB_G0270862	DDB_G0270862_RTE, products: TRE5-A ORF1
24630.8	0.340581	0.0947226	1.48338e-05	0.000452615	DDB_G0270864	DDB_G0270864, products: unknown
97.3136	-0.0276423	0.146802	0.698236	0.928842	DDB_G0270866	magoh, products: mago nashi protein
75.1808	-0.0116063	0.157605	0.869645	0.971092	DDB_G0270868	DDB_G0270868, products:
239.944	0.0367811	0.123295	0.595849	0.882214	DDB_G0270870	atp9b, products: ATPase, class II, type 9B
16.0718	-0.0564687	0.230494	0.403802	0.780302	DDB_G0270872	DDB_G0270872_ps, products: pseudogene
3680.72	-0.0447407	0.0745694	0.429032	0.8002	DDB_G0270880	gflC, products: PHD zinc finger-containing protein
108.51	-0.249853	0.227722	0.0242178	0.17672	DDB_G0270882	nosip, products: putative nitric oxide synthase-interacting protein
8289.68	0.205732	0.123441	0.0117779	0.10812	DDB_G0270884	abnA, products: actobindin A
58.0038	-0.121113	0.196839	0.158745	0.517503	DDB_G0270886	DDB_G0270886_RTE, products: TRE3-D ORF2
20.974	-0.0875509	0.244112	0.239992	0.633294	DDB_G0270888	DDB_G0270888_RTE, products: TRE3-D ORF1
276.045	-0.0841084	0.127717	0.252022	0.648003	DDB_G0270894	irlC, products: putative protein serine/threonine kinase, IRE family protein kinase
602.073	-0.614458	0.121284	1.56457e-08	1.01311e-06	DDB_G0270896	DDB_G0270896_RTE, products: TRE5-A ORF1
99.5012	-0.0990212	0.190249	0.225329	0.612351	DDB_G0270898	DDB_G0270898, products:
762.356	0.0315309	0.0920026	0.613615	0.890118	DDB_G0270902	DDB_G0270902, products: Ninein-like protein
4234.12	0.255139	0.0905947	0.000311221	0.0060235	DDB_G0270910	DDB_G0270910, products: eukaryotic translation initiation factor 4E (eIF-4E) family protein
7.75473	0.107618	0.323071	0.107406	NA	DDB_G0270914	DDB_G0270914, products:
137.544	-0.0293052	0.14808	0.681765	0.922048	DDB_G0270916	DDB_G0270916, products:
1136.99	-0.173101	0.113692	0.0226142	0.169933	DDB_G0270918	DDB_G0270918, products: DENN domain-containing protein
855.913	-0.116739	0.145349	0.143875	0.493238	DDB_G0270920	DDB_G0270920, products: unknown
462.29	0.386504	0.210686	0.00238247	0.0327885	DDB_G0270922	DDB_G0270922, products:
71.9983	-0.12659	0.217912	0.146078	0.497604	DDB_G0270924	DDB_G0270924, products:
257.201	0.026507	0.131159	0.704592	0.929944	DDB_G0270928	sir2E, products: NAD(+)-dependent deacetylase, silent information regulator protein (Sir2) family protein
639.686	0.0104025	0.101849	0.872005	0.972501	DDB_G0270932	phr, products: Sca1 complex protein PHR
113.728	-0.0129602	0.13417	0.852592	0.968892	DDB_G0270934	DDB_G0270934, products:
79.5105	0.0818851	0.166915	0.29499	0.696194	DDB_G0270936	DDB_G0270936, products:
76.9765	-1.31645	0.425971	7.23513e-06	0.000239513	DDB_G0270946	DDB_G0270946, products: C-4 methyl sterol oxidase, methylsterol monooxygenase
401.538	-0.167166	0.147444	0.0505395	0.281902	DDB_G0270948	fntB, products: protein farnesyltransferase beta subunit
133.717	0.048293	0.12953	0.496253	0.83432	DDB_G0270950	DDB_G0270950_RTE, products: TRE5-B ORF2
661.791	1.81591	0.125363	5.89474e-49	7.22021e-46	DDB_G0270952	DDB_G0270952_RTE, products: Skipper GAG-PRO
492.183	1.66951	0.147712	6.54136e-31	2.67074e-28	DDB_G0270954	DDB_G0270954_RTE, products: Skipper GAG-PRO-POL
63.835	-0.00176972	0.154305	0.979989	0.994743	DDB_G0270958	DDB_G0270958, products:
535.81	-0.017495	0.096334	0.782432	0.947452	DDB_G0270962	DDB_G0270962, products: IPT/TIG domain-containing protein
251.855	-0.0306198	0.11887	0.654166	0.908482	DDB_G0270966	DDB_G0270966, products: Ribonuclease H2 subunit B
43.5371	-0.00502528	0.19223	0.940423	0.98617	DDB_G0270968	DDB_G0270968_RTE, products: TRE3-A ORF1
1128.85	-0.0950537	0.106152	0.167787	0.529484	DDB_G0270972	DDB_G0270972, products: DUF341 family protein
562.998	0.0332019	0.123795	0.631603	0.898848	DDB_G0270978	DDB_G0270978, products: putative transmembrane protein
20535.5	-0.00252535	0.0966268	0.968177	0.993656	DDB_G0270984	rpl36a, products: S60 ribosomal protein L36a
631.511	-0.17858	0.120399	0.0231124	0.171721	DDB_G0270990	DDB_G0270990, products: putative acyl-CoA oxidase
16179.1	0.114293	0.0895463	0.0747138	0.359684	DDB_G0270992	sec31, products: WD40 repeat-containing protein, putative transport protein
817.19	0.237963	0.133432	0.00676472	0.0727738	DDB_G0270994	psaA, products: puromycin-sensitive aminopeptidase PsaA
264.886	-0.391711	0.213013	0.00229052	0.0317191	DDB_G0270996	DDB_G0270996, products:
106.806	-0.207834	0.216282	0.0429744	0.258396	DDB_G0271000	pks3, products: putative polyketide synthase, beta-ketoacyl synthase family protein
116.605	-0.237216	0.258033	0.0327879	0.21661	DDB_G0271002	DDB_G0271002, products: WD40 repeat-containing protein DDB_G0271002
11.7257	-0.0445241	0.231728	0.48763	0.828641	DDB_G0271006	DDB_G0271006_RTE, products: TRE3-B ORF2
32.2007	0.0665013	0.197277	0.374803	0.759762	DDB_G0271010	DDB_G0271010, products: UPF0459 protein C19orf50
874.241	0.0434383	0.10093	0.504896	0.83859	DDB_G0271014	DDB_G0271014, products:
850.682	-0.574155	0.128646	3.33225e-07	1.50372e-05	DDB_G0271016	DDB_G0271016, products:
611.817	-0.182211	0.123942	0.0228563	0.170705	DDB_G0271018	DDB_G0271018_RTE, products: TRE5-A ORF2
769.268	-0.555524	0.126242	4.76805e-07	2.07519e-05	DDB_G0271020	DDB_G0271020_RTE, products: TRE5-A ORF1
178.115	-0.0572497	0.13612	0.430186	0.801098	DDB_G0271022	adcC, products: arrestin domain-containing protein AdcC
51.9937	0.013786	0.17765	0.84305	0.965964	DDB_G0271024	DDB_G0271024, products:
22.2052	0.0524776	0.197187	0.467157	0.820848	DDB_G0271026	DDB_G0271026_RTE, products: TRE3-C ORF2
53.0304	-0.0287028	0.167258	0.687989	0.92493	DDB_G0271028	DDB_G0271028_RTE, products: TRE5-A ORF1
26.1652	-0.0613629	0.222278	0.383929	0.76808	DDB_G0271032	DDB_G0271032, products: EGF-like domain-containing protein
48.1939	0.0882781	0.203948	0.26424	0.659986	DDB_G0271034	DDB_G0271034, products:
489.854	-0.0225363	0.105629	0.73116	0.936958	DDB_G0271040	ints2, products: integrator complex subunit 2
139.697	0.164779	0.196746	0.0783575	0.368992	DDB_G0271044	DDB_G0271044, products: putative protein transport protein
47.842	-0.0683145	0.18122	0.370184	0.755935	DDB_G0271050	magA, products: DNA-3-methyladenine glycosylase I
17627.5	-0.165672	0.0835005	0.00882506	0.0878816	DDB_G0271052	snf2b, products: SNF2-related protein Snf2a
384.185	-0.149869	0.147863	0.0738274	0.35702	DDB_G0271054	DDB_G0271054, products: SMAD/FHA domain-containing protein
1910.56	0.00987144	0.0724818	0.858766	0.970189	DDB_G0271058	vilC, products: villin-like protein C
8.82639	-0.0182164	0.23346	0.753707	NA	DDB_G0271060	DDB_G0271060, products:
69.5714	-0.0404315	0.15347	0.577403	0.875116	DDB_G0271062	DDB_G0271062, products: FNIP repeat-containing protein
23.7189	-0.0654063	0.226143	0.356219	0.746792	DDB_G0271066	DDB_G0271066, products: GNS1/SUR4 family protein, very long chain fatty acid elongase
51.5737	0.0617101	0.177828	0.412176	0.786206	DDB_G0271068	iliC, products: unknown
166.183	-0.000536305	0.132467	0.993836	0.998611	DDB_G0271072	med27, products: putative mediator complex subunit 27
58.6279	-1.52761	0.811515	4.04979e-05	0.00107501	DDB_G0271076	DDB_G0271076_RTE, products: TRE3-A ORF1
240.78	-0.0429239	0.123528	0.538123	0.856727	DDB_G0271078	orcC, products: origin recognition complex subunit 3
25.3886	-0.0376164	0.207229	0.579451	0.875919	DDB_G0271084	DDB_G0271084, products: glutaredoxin family protein
305.033	0.0254567	0.118411	0.708452	0.932065	DDB_G0271086	gip1, products: G-protein regulatory protein 1
165.945	-0.0323336	0.142752	0.650392	0.907546	DDB_G0271096	atg7, products: autophagy protein 7, E1-like enzyme family protein
95.6577	0.0943735	0.175966	0.241252	0.634898	DDB_G0271100	DDB_G0271100, products: Exosome complex component RRP45
75.2253	-0.0193342	0.150136	0.785308	0.948821	DDB_G0271104	DDB_G0271104, products:
206.233	0.141128	0.167942	0.103044	0.42374	DDB_G0271106	sod2, products: superoxide dismutase, putative mitochondrial superoxide dismutase
319.425	-0.0520974	0.118513	0.452699	0.813548	DDB_G0271108	DDB_G0271108, products:
76.2637	0.191151	0.226153	0.057225	0.304327	DDB_G0271112	DDB_G0271112, products:
39.0895	0.00309061	0.184058	0.964002	0.99275	DDB_G0271114	DDB_G0271114, products:
605.87	0.0602428	0.104277	0.366153	0.754301	DDB_G0271120	DDB_G0271120, products: protein kinase C substrate 80K-H homolog
113.624	0.168043	0.204552	0.0764517	0.364976	DDB_G0271122	ufd1, products: ubiquitin fusion degradation protein UFD1 family protein
283.692	0.0238401	0.107436	0.717945	0.933634	DDB_G0271124	DDB_G0271124, products:
124.472	-0.0655525	0.155275	0.384219	0.76808	DDB_G0271126	plbB, products: phospholipase B-like protein
109.281	0.256276	0.247918	0.0245707	0.178642	DDB_G0271134	celA, products: cellulase 270-6
34.892	0.0535143	0.189457	0.464602	0.819869	DDB_G0271136	gafA, products: GAF domain-containing protein
106.486	-0.0802521	0.155868	0.298355	0.69855	DDB_G0271138	abcA8, products: ABC transporter A family protein
438.335	-0.0384698	0.102419	0.555997	0.865176	DDB_G0271140	abcA7, products: ABC transporter A family protein
21.4816	0.021983	0.200345	0.742422	0.938816	DDB_G0271142	proC, products: profilin III
8047.03	0.159492	0.0800922	0.00944845	0.0920579	DDB_G0271144	cnxA, products: calnexin
1468.59	0.0175098	0.09064	0.77705	0.945937	DDB_G0271146	udkD, products: adenylate cyclase domain-containing protein, phosphoribulokinase/uridine kinase family protein
32883.3	-0.0175642	0.0935881	0.779187	0.946713	DDB_G0271148	rps25, products: 40S ribosomal protein S25
13.9427	-0.117586	0.293288	0.128327	0.466614	DDB_G0271150	DDB_G0271150, products:
85.4686	-0.328589	0.327427	0.0131891	0.116822	DDB_G0271152	DDB_G0271152, products:
8.57712	0.213851	0.431587	0.024474	NA	DDB_G0271154	DDB_G0271154_TE, products: thugS element
11.4197	-0.00859129	0.224786	0.885651	0.975702	DDB_G0271166	DDB_G0271166, products:
38.8607	0.110094	0.220787	0.185387	0.555383	DDB_G0271188	DDB_G0271188, products: zinc finger, B-box domain and FNIP repeat-containing protein
20.1215	-0.00684886	0.200272	0.917071	0.981856	DDB_G0271202	DDB_G0271202, products:
16.3412	0.00105724	0.208757	0.986773	0.996609	DDB_G0271234	dduB, products: unknown
64.5911	-0.0149596	0.161738	0.83258	0.962727	DDB_G0271238	DDB_G0271238, products: unknown
329.97	-0.0456899	0.112993	0.501345	0.835509	DDB_G0271240	utp18, products: WD40 repeat-containing protein, U3 snoRNP protein, U3 small nucleolar ribonucleoprotein
394.492	-0.0378505	0.113519	0.576076	0.874517	DDB_G0271242	DDB_G0271242, products:
10.0173	-0.0567965	0.248433	0.372351	NA	DDB_G0271244	DDB_G0271244, products:
52.1034	-0.0177458	0.162225	0.802329	0.952877	DDB_G0271246	med19, products: putative mediator complex subunit 19
89.6865	-0.0396257	0.141666	0.580843	0.876161	DDB_G0271248	DDB_G0271248, products: Methylmalonic aciduria type A protein, mitochondrial
66.9774	-0.011361	0.158153	0.872348	0.972501	DDB_G0271250	DDB_G0271250, products:
1266.99	0.484389	0.118424	2.12695e-06	7.88535e-05	DDB_G0271264	usp14, products: ubiquitin domain-containing protein, peptidase C19 family protein, putative ubiquitin carboxyl-terminal hydrolase (UCH)
33.6631	0.0104088	0.19388	0.876814	0.973809	DDB_G0271268	DDB_G0271268, products: Uncharacterized N-acetyltransferase yncA
39.8693	-0.0400293	0.196124	0.568018	0.87011	DDB_G0271270	DDB_G0271270, products: beta-lactamase-like domain-containing protein
584.725	-0.0659081	0.107084	0.329855	0.728113	DDB_G0271272	DDB_G0271272, products: DNA polymerase V family protein
642.265	0.0866066	0.109538	0.211983	0.592368	DDB_G0271280	DDB_G0271280, products: unknown
1203.7	0.270591	0.164456	0.0073835	0.0769212	DDB_G0271282	csn7, products: proteasome component region PCI (PINT) domain-containing protein, COP9 signalosome complex subunit 7
214	-0.0471657	0.119458	0.495926	0.834229	DDB_G0271286	clasp, products: CLIP-associating protein
25.5044	0.0357389	0.189599	0.611382	0.889377	DDB_G0271288	DDB_G0271288, products: NPR2 family protein
168.656	0.210172	0.18359	0.0325421	0.215957	DDB_G0271290	DDB_G0271290, products:
25.1627	-0.049784	0.208954	0.476762	0.823149	DDB_G0271292	DDB_G0271292, products: NAP (nucleosome assembly protein) family protein
200.527	0.243337	0.223068	0.0259313	0.184331	DDB_G0271294	DDB_G0271294, products:
43.0223	-0.19513	0.274051	0.0562822	0.301222	DDB_G0271296	DDB_G0271296, products:
58290.4	-0.0295298	0.105007	0.652821	0.908058	DDB_G0271298	rpl27, products: S60 ribosomal protein L27
10.3093	0.0722174	0.24992	0.291958	NA	DDB_G0271300	DDB_G0271300, products:
17.4696	0.0202304	0.198552	0.762833	0.943007	DDB_G0271302	DDB_G0271302, products:
29.0576	-0.0122547	0.1863	0.857943	0.970065	DDB_G0271304	DDB_G0271304, products:
164.247	0.0243862	0.122919	0.722776	0.934703	DDB_G0271306	nmd3, products: 60S ribosomal export protein
34.7866	-0.00304325	0.17103	0.965277	0.99312	DDB_G0271308	DDB_G0271308, products:
48.5528	0.0208562	0.171984	0.767603	0.944891	DDB_G0271310	ucpA, products: transmembrane protein, mitochondrial substrate carrier family protein, putative mitochondrial oxaloacetate transporter
107.531	0.0109707	0.142412	0.876058	0.973348	DDB_G0271312	sf3b5, products: splicing factor 3B subunit 5, splicing factor 3B subunit 10 family protein
19.2953	0.2925	0.420764	0.0177187	0.143631	DDB_G0271314	iliH, products: Endo-1,4-beta-glucanase family protein, glycoside hydrolase family 9 protein
880.165	0.00906715	0.0900368	0.882961	0.975702	DDB_G0271334	DDB_G0271334, products: C2 calcium/lipid-binding (CaLB) region-containing protein, dilute domain-containing protein
118.682	-0.0250927	0.150996	0.724932	0.935049	DDB_G0271336	DDB_G0271336, products:
1383.23	0.0122079	0.10988	0.853786	0.968967	DDB_G0271338	taf7, products: transcription initiation factor TFIID subunit, TFIID subunit
43.2837	0.316557	0.337816	0.0151964	0.129516	DDB_G0271340	DDB_G0271340, products: acyl-CoA oxidase
1003.23	0.106775	0.105645	0.123814	0.458368	DDB_G0271342	dgat1, products: diacylglycerol O-acyltransferase 1
2868.32	0.0318479	0.0967279	0.617288	0.891765	DDB_G0271344	idhA, products: isocitrate dehydrogenase (NAD+), isocitrate dehydrogenase (NAD+) alpha subunit
270.04	0.0595403	0.120402	0.396334	0.774423	DDB_G0271346	yod1, products: C2H2-type zinc finger-containing protein, ubiquitin thioesterase OTU1
29.6496	0.0206373	0.19141	0.762541	0.943007	DDB_G0271348	DDB_G0271348, products: peptidase C19 family protein, putative ubiquitin carboxyl-terminal hydrolase (UCH)
21.0344	-0.0904642	0.254658	0.220288	0.605473	DDB_G0271350	DDB_G0271350, products:
35.9594	0.0324935	0.194333	0.638817	0.901896	DDB_G0271356	DDB_G0271356, products: LIM-type zinc finger-containing protein
306.691	-0.0343724	0.119932	0.616796	0.891355	DDB_G0271358	DDB_G0271358, products:
44.136	-0.0556528	0.211168	0.432487	0.802093	DDB_G0271360	DDB_G0271360, products:
13.8758	-0.0137265	0.211256	0.829501	0.962593	DDB_G0271370	DDB_G0271370, products: tRNA guanosine-2'-O-methyltransferase
501.06	-0.0404543	0.099573	0.531825	0.85252	DDB_G0271374	DDB_G0271374, products: Glycerophosphodiester phosphodiesterase domain-containing protein 1
317.067	0.377792	0.231923	0.00380267	0.0471157	DDB_G0271376	DDB_G0271376, products:
43.0411	-0.0230778	0.175753	0.743208	0.938816	DDB_G0271378	DDB_G0271378, products:
128.445	-0.000653537	0.124914	0.992393	0.998166	DDB_G0271384	DDB_G0271384, products:
161.11	0.0227394	0.140063	0.747398	0.940149	DDB_G0271388	cog8, products: oligomeric Golgi complex component, Dor1-like protein
27.425	0.0454357	0.190836	0.526096	0.849859	DDB_G0271394	DDB_G0271394, products:
1269.03	0.192448	0.137775	0.0239762	0.175552	DDB_G0271398	mon2, products: unknown
27.2992	-0.325995	0.489184	0.0114571	0.105741	DDB_G0271400	dcc1, products: sister chromatid cohesion protein Dcc1
537.067	0.0110143	0.103422	0.865274	0.970782	DDB_G0271402	DDB_G0271402, products: LISK family protein kinase, protein kinase, TKL group, tyrosine kinase-like protein
15.4268	-0.0575548	0.250795	0.363403	0.752733	DDB_G0271404	DDB_G0271404, products:
89.2866	-0.0605321	0.172613	0.42071	0.791979	DDB_G0271408	DDB_G0271408, products:
31.1405	-0.0953735	0.246186	0.213281	0.593966	DDB_G0271410	DDB_G0271410_ps, products: pseudogene
34.031	0.104827	0.220922	0.200201	0.575891	DDB_G0271418	DDB_G0271418, products:
19.8384	0.113547	0.249588	0.164577	0.526127	DDB_G0271422	DDB_G0271422_TE, products: Tdd-4 fragment
13.319	0.0806677	0.250895	0.257079	0.652562	DDB_G0271430	DDB_G0271430, products: unknown
19.5786	0.119597	0.281915	0.133728	0.476707	DDB_G0271434	DDB_G0271434, products:
143.802	0.133728	0.165031	0.11637	0.44843	DDB_G0271440	DDB_G0271440_TE, products: Tdd-4
28.0237	-0.0852992	0.23135	0.259447	0.654853	DDB_G0271452	DDB_G0271452_RTE, products: TRE3-A ORF2
37.3634	-0.191567	0.275865	0.0586533	0.309282	DDB_G0271454	DDB_G0271454_RTE, products: TRE3-A ORF1
60.5213	-0.0117289	0.176055	0.866351	0.970865	DDB_G0271456	DDB_G0271456_RTE, products: DGLT-A
83.424	0.0395766	0.156774	0.585562	0.8776	DDB_G0271470	DDB_G0271470, products:
17.0849	-0.213544	0.371816	0.0368414	0.232948	DDB_G0271472	DDB_G0271472, products:
160.726	-0.0356264	0.15992	0.621927	0.894647	DDB_G0271480	DDB_G0271480, products:
55.3504	0.00245553	0.151328	0.972229	0.994743	DDB_G0271484	DDB_G0271484, products:
2786.69	0.0886581	0.0984534	0.181006	0.549601	DDB_G0271488	vta1, products: unknown
332.382	-0.0611213	0.126619	0.392202	0.771505	DDB_G0271490	melA, products: putative alpha-galactosidase, putative melibiase
1346.6	-0.241889	0.129448	0.00531772	0.0606305	DDB_G0271500	keaA, products: Kelch repeat-containing protein
790.376	0.0388686	0.0882502	0.527247	0.850892	DDB_G0271502	lvsD, products: BEACH domain-containing protein
1771.22	-0.178034	0.108447	0.0165895	0.137295	DDB_G0271504	lvsB, products: BEACH domain-containing protein LvsB
405.895	0.00213925	0.103416	0.973687	0.994743	DDB_G0271506	pitrm1, products: peptidase M16 family protein, pitrilysin metalloprotease
31.9145	0.0781248	0.201829	0.31028	0.708291	DDB_G0271510	DDB_G0271510, products:
35.5534	-0.0422707	0.191366	0.552132	0.864113	DDB_G0271512	trmt61, products: tRNA(m1A58)-methyltransferase subunit, tRNA (adenine-N(1)-)-methyltransferase catalytic subunit
311.265	-0.019762	0.131734	0.77679	0.945937	DDB_G0271514	rpc5, products: RNA polymerase III subunit
18.0464	-0.019259	0.215838	0.760516	0.942974	DDB_G0271516	DDB_G0271516, products: phosphoesterase, PA-phosphatase related-family protein
55.405	-0.035066	0.163769	0.627017	0.897203	DDB_G0271520	pks5, products: putative polyketide synthase, beta-ketoacyl synthase family protein
80.2954	0.0408697	0.147364	0.571851	0.872739	DDB_G0271524	pks6, products: putative polyketide synthase, beta-ketoacyl synthase family protein
31.9156	-0.0082863	0.173939	0.905456	0.980339	DDB_G0271530	pks9, products: putative polyketide synthase, beta-ketoacyl synthase family protein
143.792	0.154099	0.179976	0.0870324	0.390796	DDB_G0271532	DDB_G0271532, products: pyridine nucleotide-disulphide oxidoreductase, NAD-binding region domain-containing protein
99.2432	0.0497161	0.146947	0.496113	0.83432	DDB_G0271534	DDB_G0271534, products:
304.414	-0.0403699	0.120737	0.559185	0.86643	DDB_G0271536	rcnA, products: modulatory calcineurin-interacting protein
133.976	0.174263	0.196463	0.0668968	0.336499	DDB_G0271538	DDB_G0271538, products: LISK family protein kinase, protein kinase, TKL group, tyrosine kinase-like protein
2062.47	0.133277	0.109307	0.064181	0.330503	DDB_G0271544	acat, products: acetoacetyl-CoA thiolase
29.9319	-0.0564467	0.224974	0.411392	0.785585	DDB_G0271546	DDB_G0271546, products:
24.4793	-0.155996	0.277785	0.0890066	0.395001	DDB_G0271548	DDB_G0271548, products:
223.667	-0.119856	0.150345	0.139522	0.485692	DDB_G0271550	DDB_G0271550, products: putative myosin light chain kinase DDB_G0271550
1831.61	-0.00054811	0.076719	0.992351	0.998166	DDB_G0271552	DDB_G0271552, products: SAM/PH domain-containing protein
675.829	0.0457261	0.103255	0.487087	0.828641	DDB_G0271564	pdhX, products: putative pyruvate dehydrogenase complex, component X
1767.85	0.0943499	0.0843016	0.124761	0.460483	DDB_G0271572	exosc10, products: exosome component 10
24.8837	-0.0372955	0.194533	0.593659	0.881238	DDB_G0271586	tgrK1, products: immunoglobulin E-set domain-containing protein
141.574	-0.429615	0.278731	0.0031952	0.0410729	DDB_G0271592	DDB_G0271592, products:
12.2049	-0.0392109	0.233725	0.528984	0.85195	DDB_G0271602	DDB_G0271602, products:
3158.9	-0.151047	0.0941032	0.0248986	0.180174	DDB_G0271606	DDB_G0271606, products:
960.188	-0.113054	0.102289	0.0995139	0.416617	DDB_G0271608	rev3, products: DNA polymerase zeta catalytic subunit
717.894	0.00876857	0.085036	0.883984	0.975702	DDB_G0271610	DDB_G0271610, products:
31.9275	-0.121657	0.238755	0.151899	0.50637	DDB_G0271614	pks7, products: putative polyketide synthase, beta-ketoacyl synthase family protein
31.196	0.0297155	0.178739	0.674684	0.918067	DDB_G0271618	pks8, products: putative polyketide synthase, beta-ketoacyl synthase family protein
10.2239	-0.130462	0.329812	0.0869045	NA	DDB_G0271624	DDB_G0271624, products:
1308.81	-0.0617635	0.0865738	0.314896	0.713457	DDB_G0271626	dotA, products: histone H3 lysine 79 methyltransferase
148.228	-0.0426676	0.123132	0.540095	0.857551	DDB_G0271628	dlpC, products: dynamin-like protein C
894.582	0.0471375	0.0913024	0.45154	0.812352	DDB_G0271630	sac1, products: putative phosphoinositide phosphatase
134.627	0.0407181	0.145894	0.572687	0.873273	DDB_G0271632	pus7, products: tRNA pseudouridine synthase D
12.6074	-0.0183749	0.228517	0.757893	0.942721	DDB_G0271634	DDB_G0271634, products:
43.4811	-0.112446	0.217507	0.179974	0.548336	DDB_G0271636	DDB_G0271636, products:
24.5388	-0.0626854	0.218005	0.380687	0.764846	DDB_G0271638	DDB_G0271638, products:
33.9383	0.139261	0.251352	0.11675	0.44865	DDB_G0271640	DDB_G0271640, products:
757.84	0.0320964	0.0937374	0.610105	0.888502	DDB_G0271664	DDB_G0271664, products: putative phosphate exporter 3
356.242	-0.643922	0.200989	2.19569e-05	0.000638164	DDB_G0271666	prtB, products: proteosomal alpha-subunit 7-1
12935.3	0.0485709	0.0909506	0.437395	0.803563	DDB_G0271668	rpl36, products: S60 ribosomal protein L36
3585.51	-0.151795	0.0930198	0.0233345	0.173221	DDB_G0271670	lsr1, products: long serine homopolymer repeat protein 1
1084.5	-0.222245	0.115881	0.00552346	0.0623134	DDB_G0271676	nlp, products: SH3 domain-containing protein Nlp
7175.97	0.0670597	0.0770115	0.24679	0.641696	DDB_G0271678	pckA, products: phosphoenolpyruvate carboxykinase
247.359	-0.0502496	0.119844	0.469775	0.821136	DDB_G0271682	DDB_G0271682, products: SMAD/FHA domain-containing protein, protein kinase, TKL group, tyrosine kinase-like protein, ARK family protein kinase
24.5732	-0.00278482	0.190126	0.967117	0.993656	DDB_G0271686	grlB, products: GABA receptor GrlB
10.0768	-0.00583613	0.229873	0.919871	NA	DDB_G0271688	grlO, products: G-protein-coupled receptor (GPCR) family 3 protein 14
524.156	-0.0460164	0.105151	0.487376	0.828641	DDB_G0271690	DDB_G0271690, products: putative RNA polymerase II C-terminal domain phosphatase
149.007	0.152481	0.192003	0.0943639	0.406163	DDB_G0271692	comC, products: EGF-like domain-containing protein
1991.65	0.182618	0.103966	0.0121768	0.110344	DDB_G0271694	DDB_G0271694, products:
85.5007	0.0347422	0.163526	0.630074	0.898848	DDB_G0271696	prtA, products: proteosomal alpha-subunit M3
53.0876	0.0480919	0.166359	0.513255	0.844014	DDB_G0271698	DDB_G0271698, products:
104.006	0.0622743	0.151492	0.404348	0.780478	DDB_G0271708	ddx31, products: putative RNA helicase, DEAD/DEAH box helicase
250.259	-0.108923	0.144544	0.167472	0.529055	DDB_G0271720	DDB_G0271720, products: short-chain dehydrogenase/reductase (SDR) family protein
44.5143	0.100867	0.20363	0.217681	0.601481	DDB_G0271724	DDB_G0271724, products: RRP15-like protein
92.297	-0.054612	0.162269	0.46252	0.819626	DDB_G0271726	DDB_G0271726, products: Ubiquitin-conjugating enzyme E2 G1
471.49	0.0683595	0.143041	0.358627	0.748734	DDB_G0271728	DDB_G0271728, products:
7131.27	0.0589469	0.0871029	0.33835	0.733598	DDB_G0271730	DDB_G0271730, products: Phosphatidate phosphatase LPIN2
154.64	-0.0612842	0.134972	0.399595	0.776596	DDB_G0271732	DDB_G0271732, products: AN1-type zinc finger-containing protein, DNA helicase, single-stranded nucleic acid binding R3H domain-containing protein
693.439	0.00908097	0.102259	0.888285	0.975827	DDB_G0271734	rapgap1, products: RapGAP/RanGAP domain-containing protein
184.318	0.0730426	0.149766	0.334722	0.73102	DDB_G0271736	rabC, products: Rab GTPase
146.865	-0.0140428	0.146455	0.842407	0.965873	DDB_G0271738	tubC, products: gamma-tubulin
31.5557	-0.00126101	0.181943	0.985365	0.996609	DDB_G0271742	DDB_G0271742, products: UPF0548 family protein
393.877	-0.0859596	0.147664	0.263723	0.659039	DDB_G0271750	nfaA, products: Ras GTPase activation domain-containing protein
15.6336	-0.0402675	0.230277	0.525541	0.849546	DDB_G0271752	DDB_G0271752, products: NADH:flavin oxidoreductase/NADH oxidase domain-containing protein
1017.86	-0.18909	0.121988	0.0179822	0.14477	DDB_G0271754	DDB_G0271754, products: putative histone methyltransferase complex subunit ASH2
30.8505	0.00319434	0.184372	0.962771	0.992309	DDB_G0271760	ipkA1, products: inositol-polyphosphate multikinase
14.1338	0.00178887	0.21498	0.977066	0.994743	DDB_G0271764	DDB_G0271764, products: unknown
1352.72	-0.0481509	0.0886175	0.435918	0.803071	DDB_G0271766	pARTg, products: U box domain-containing protein, PARP domain-containing protein, Appr-1-p processing domain-containing protein, WWE domain-containing protein
22.3284	0.177885	0.328186	0.0595928	0.312218	DDB_G0271770	DDB_G0271770, products: unknown
918.275	-0.0606487	0.0935416	0.340986	0.735219	DDB_G0271774	uqcrh, products: ubiquinol-cytochrome-c reductase hinge protein, ubiquinol-cytochrome-c reductase subunit
25.3249	-0.122186	0.261044	0.141511	0.489832	DDB_G0271778	cyp516B1, products: cytochrome P450 family protein
258.425	-0.358453	0.235443	0.0052614	0.0602712	DDB_G0271784	DDB_G0271784, products: unknown
108.401	-0.020977	0.145524	0.767233	0.944891	DDB_G0271788	wdr57, products: WD40 repeat-containing protein, putative U5 small nuclear ribonucleoprotein
86.7455	0.00586099	0.155005	0.933837	0.985322	DDB_G0271790	tmem14B, products: transmembrane protein 14 B
40.7635	0.0413623	0.188376	0.561846	0.867852	DDB_G0271792	arrC, products: ADP-ribosylation factor-related, ARF-related
59.2533	0.0328999	0.160376	0.647718	0.90632	DDB_G0271794	captA, products: CDP-alcohol phosphatidyltransferase
325.029	0.00580965	0.101936	0.928284	0.983715	DDB_G0271798	DDB_G0271798, products: UBP-type zinc finger-containing protein, peptidase C19 family protein, putative ubiquitin carboxyl-terminal hydrolase (UCH)
28.688	0.039277	0.195592	0.575064	0.873843	DDB_G0271804	DDB_G0271804, products:
659.507	-0.0432632	0.0876364	0.480893	0.825344	DDB_G0271806	rapgap3, products: RapA GTPase regulatory protein 3
11.1977	-0.0751618	0.264637	0.257606	0.652886	DDB_G0271808	DDB_G0271808, products:
1177.47	0.041513	0.0955404	0.514441	0.844014	DDB_G0271812	DDB_G0271812, products: SH3 domain-containing protein, FCH domain-containing protein
5.07686	-0.00975195	0.261528	0.829729	NA	DDB_G0271814	DDB_G0271814, products:
3187.51	0.0334991	0.0780023	0.562494	0.867852	DDB_G0271816	DDB_G0271816, products:
100.824	0.0123445	0.139652	0.860401	0.970272	DDB_G0271820	DDB_G0271820, products: short-chain dehydrogenase/reductase (SDR) family protein
175.193	0.0379244	0.122801	0.584372	0.877018	DDB_G0271828	DDB_G0271828, products: coiled-coil domain-containing protein
20.4803	0.0322622	0.228378	0.603368	0.886121	DDB_G0271830	DDB_G0271830, products: Nogo-B receptor
144.229	-0.139189	0.175767	0.111128	0.436869	DDB_G0271832	DDB_G0271832, products: Zinc finger CCHC domain-containing protein 7
148.165	-0.0418733	0.143143	0.561199	0.867759	DDB_G0271834	DDB_G0271834, products:
44.586	0.0270342	0.17081	0.703958	0.929725	DDB_G0271836	DDB_G0271836, products:
41.5009	0.0493572	0.186192	0.497615	0.834942	DDB_G0271838	DDB_G0271838, products: unknown
637.747	0.0154072	0.101229	0.81118	0.955791	DDB_G0271842	scsC, products: succinate-CoA ligase (ADP-forming), succinyl-CoA synthetase (ADP-forming), ATP-specific succinyl-CoA synthetase beta subunit
425.576	-0.00743528	0.0945299	0.905744	0.980339	DDB_G0271844	DDB_G0271844, products: Phox domain-containing protein, Rho GTPase domain containing protein, vacuolar sorting protein 9 domain-containing protein
57430.8	-0.01984	0.0625701	0.695829	0.928014	DDB_G0271848	porA, products: porin
142.73	0.0337674	0.149267	0.638311	0.901896	DDB_G0271850	DDB_G0271850, products:
79.149	0.232835	0.234446	0.032186	0.214257	DDB_G0271854	DDB_G0271854, products: Uncharacterized protein YIR042C
62.5832	0.0428711	0.167644	0.556567	0.86519	DDB_G0271856	vps52C, products: Vps52 / Sac2 family protein
121.549	0.078307	0.181097	0.315071	0.713529	DDB_G0271858	gmppA, products: GTP:alpha-D-mannose-1-phosphate guanylyltransferase, mannose-1-phosphate guanylyltransferase alpha
530.337	-0.0312059	0.103353	0.632858	0.899245	DDB_G0271860	DDB_G0271860, products: putative protein tyrosine phosphatase, dual specificity
1383.63	-0.033555	0.100238	0.603797	0.886121	DDB_G0271862	eif2s1, products: eukaryotic translation initiation factor 2 (eIF2) subunit 1
24.9379	0.0207974	0.187316	0.762852	0.943007	DDB_G0271864	mocs2l, products: molybdenum cofactor synthesis protein 2 large subunit
87.8437	0.196762	0.250907	0.0550976	0.298237	DDB_G0271866	DDB_G0271866, products: enoyl-CoA hydratase/isomerase family protein
1246.15	-0.167561	0.117248	0.029096	0.200055	DDB_G0271868	gefS, products: Ras guanine nucleotide exchange factor
735.889	-0.0515785	0.0914441	0.411289	0.785585	DDB_G0271870	agnC, products: argonaut-like protein
90.0127	-0.0177313	0.1696	0.801525	0.952877	DDB_G0271872	DDB_G0271872, products:
10.9659	0.00616449	0.223904	0.91799	0.981856	DDB_G0271876	DDB_G0271876, products:
479.815	-0.0257318	0.133663	0.713792	0.932319	DDB_G0271878	DDB_G0271878, products:
68.6444	-0.0535102	0.165339	0.471027	0.821184	DDB_G0271880	DDB_G0271880, products: UPF0183 family protein
338.529	-0.018551	0.129501	0.789267	0.949617	DDB_G0271882	vatF, products: vacuolar ATPase subunit F
376.011	0.115408	0.141183	0.143737	0.493238	DDB_G0271884	DDB_G0271884, products: putative quinone oxidoreductase, alcohol dehydrogenase
2550.27	-0.114082	0.0852908	0.0676168	0.338242	DDB_G0271886	DDB_G0271886, products: PHD zinc finger-containing protein, bromodomain-containing protein
97.2236	-0.2012	0.227586	0.0496136	0.280221	DDB_G0271890	DDB_G0271890, products:
330.332	-0.0693614	0.157488	0.36109	0.750905	DDB_G0271892	gst4, products: glutathione S-transferase 4
840.773	-0.241692	0.121713	0.00394961	0.0485157	DDB_G0271894	DDB_G0271894, products:
138.616	-0.00744909	0.133645	0.914755	0.981856	DDB_G0271900	DDB_G0271900, products:
68.5527	-0.0431938	0.154954	0.553384	0.864113	DDB_G0271902	pscA, products: putative peptidase S13, D-Ala-D-Ala carboxypeptidase C, carboxypeptidase
847.019	0.0618896	0.101502	0.348476	0.741397	DDB_G0271904	DDB_G0271904, products: phosphoenolpyruvate carboxykinase (GTP), phosphoenolpyruvate carboxykinase
44.168	0.0639442	0.186969	0.395234	0.773861	DDB_G0271906	mgluS, products: glutamate-tRNA ligase, glutamyl-tRNA synthetase, glutamate-tRNA ligase, mitochondrial, glutamyl-tRNA synthetase, mitochondrial
76.0507	-0.0418062	0.160578	0.566081	0.869792	DDB_G0271910	DDB_G0271910, products: PUA domain-containing protein, MCTS1 family protein
277.134	0.0134817	0.112747	0.84004	0.965873	DDB_G0271912	DDB_G0271912, products:
954.867	0.354829	0.151483	0.000817354	0.0138225	DDB_G0271916	rtoA, products: unknown
78.6488	-0.021967	0.157801	0.757702	0.94262	DDB_G0271922	mcfI, products: mitochondrial substrate carrier family protein
37.9982	-0.152093	0.254961	0.0982177	0.413466	DDB_G0271924	aspA, products: L-asparaginase I
550.897	-0.019963	0.104935	0.760134	0.942909	DDB_G0271928	DDB_G0271928, products:
36.9434	-0.590469	0.469842	0.00201654	0.0286731	DDB_G0271936	DDB_G0271936, products:
61.2536	0.0420006	0.15994	0.564354	0.868645	DDB_G0271944	DDB_G0271944, products:
1959.12	-0.041413	0.0901391	0.504973	0.83859	DDB_G0271946	DDB_G0271946, products: YEATS domain-containing protein 2
509.951	-4.36547e-05	0.124699	0.999492	0.999861	DDB_G0271948	DDB_G0271948, products: YEATS family protein
697.66	-0.559609	0.127766	5.1007e-07	2.18667e-05	DDB_G0271952	DDB_G0271952_RTE, products: TRE5-A ORF1
228.333	-0.0492631	0.122984	0.481647	0.825699	DDB_G0271956	DDB_G0271956, products: RING zinc finger-containing protein, IBR zinc finger-containing protein
809.776	0.0353084	0.162535	0.624833	0.895723	DDB_G0271960	mccB, products: methylcrotonyl-CoA carboxylase, 3-methylcrotonyl-CoA:carbon dioxide ligase beta subunit
46.7027	-0.110129	0.214174	0.187061	0.55903	DDB_G0271962	DDB_G0271962, products:
1412.03	0.179126	0.10262	0.0129957	0.115991	DDB_G0271968	DDB_G0271968, products: L-type lectin domain-containing protein, mannose-binding lectin
21.7681	0.0704112	0.216203	0.339313	0.734525	DDB_G0271970	DDB_G0271970, products:
19803.8	0.00228755	0.137888	0.973896	0.994743	DDB_G0271976	rpl32, products: S60 ribosomal protein L32
38.0428	0.268501	0.329138	0.0245749	0.178642	DDB_G0271980	rabR, products: Rab GTPase
481.404	0.0516895	0.10225	0.432017	0.80193	DDB_G0271982	DDB_G0271982, products:
466.957	0.0225784	0.1048	0.729981	0.936958	DDB_G0271984	rab5A, products: Rab GTPase
31.133	0.265849	0.363113	0.0245856	0.178642	DDB_G0271988	DDB_G0271988, products: transmembrane protein
107.646	0.00512497	0.156485	0.942115	0.986219	DDB_G0271992	DDB_G0271992, products:
127.777	0.317492	0.247572	0.010555	0.099998	DDB_G0271996	DDB_G0271996, products: FNIP repeat-containing protein
135.364	-0.0742643	0.141845	0.321449	0.718928	DDB_G0271998	fsjB, products: rRNA methyltransferase, putative rRNA (uridine-2'-O-)-methyltransferase
127.974	0.0730393	0.154905	0.337807	0.733451	DDB_G0272000	DDB_G0272000, products:
98.3799	0.00369013	0.136987	0.957865	0.990478	DDB_G0272002	egeA, products: C2 domain-containing protein EgeA
17.2251	0.0289765	0.207182	0.662829	0.911629	DDB_G0272004	p2xA, products: ATP-gated ion channel P2XA
466.319	-0.250268	0.15706	0.00960653	0.0934919	DDB_G0272006	DDB_G0272006, products: unknown
401.067	-0.182366	0.175529	0.0503854	0.281436	DDB_G0272012	DDB_G0272012, products: GNS1/SUR4 family protein
79.8644	-0.00696906	0.166492	0.921016	0.982662	DDB_G0272014	DDB_G0272014, products: pyridoxal-phosphate-dependent aminotransferase, putative aromatic amino acid aminotransferase
93.5616	-0.0241401	0.152812	0.73493	0.937368	DDB_G0272016	DDB_G0272016, products: DCUN1 domain-containing protein
88.4489	-0.0607144	0.179772	0.418355	0.790257	DDB_G0272018	mvk, products: mevalonate kinase
67.9016	0.0470326	0.170978	0.521327	0.847058	DDB_G0272020	DDB_G0272020, products: ankyrin repeat-containing protein, SH2 domain-containing protein, cyclin-like F-box containing protein
23.2398	-0.0463727	0.218942	0.49152	0.830893	DDB_G0272022	rpc34, products: RNA polymerase III subunit
80.406	0.323639	0.296739	0.012763	0.114228	DDB_G0272026	DDB_G0272026, products:
39.4886	-0.0241501	0.17991	0.730592	0.936958	DDB_G0272028	tpp1_ps, products: pseudogene
119.847	0.23395	0.230776	0.0311405	0.210192	DDB_G0272030	DDB_G0272030, products:
1146.59	-0.148694	0.110426	0.0424509	0.256681	DDB_G0272032	gefG, products: Ras guanine nucleotide exchange factor
13.1803	-0.0331199	0.215956	0.61195	0.889664	DDB_G0272034	DDB_G0272034, products: unknown
334.098	0.0441888	0.117074	0.519906	0.846179	DDB_G0272038	rgfA, products: Vps9 domain-containing protein RgfA
192.628	-0.000573549	0.140939	0.993473	0.998481	DDB_G0272040	DDB_G0272040, products:
102.521	-0.140055	0.179659	0.111287	0.437094	DDB_G0272048	DDB_G0272048, products:
31.2756	-0.0420685	0.20051	0.546735	0.861471	DDB_G0272052	DDB_G0272052, products: leucine-rich repeat-containing protein (LRR), putative cell surface glycoprotein
1184.87	-0.0580368	0.0926139	0.359409	0.749957	DDB_G0272054	DDB_G0272054, products: DUF1325 family protein
6844.98	-0.0304852	0.0792871	0.601026	0.884918	DDB_G0272056	DDB_G0272056, products: NOT2/NOT3/NOT5 family protein, putative CCR4-NOT complex subunit 3
20.1135	-0.0186297	0.19858	0.780592	0.947452	DDB_G0272062	DDB_G0272062, products:
4558.19	-0.00154838	0.0767698	0.978402	0.994743	DDB_G0272064	DDB_G0272064, products:
19.7291	-0.0309499	0.205303	0.644754	0.904364	DDB_G0272066	DDB_G0272066, products:
540.942	-0.0112987	0.0914617	0.855406	0.969002	DDB_G0272070	DDB_G0272070, products:
253.362	0.111253	0.165248	0.175917	0.542557	DDB_G0272072	DDB_G0272072, products:
122.3	0.0259872	0.138157	0.712825	0.932319	DDB_G0272074	DDB_G0272074, products:
1048.27	0.0379201	0.112996	0.574818	0.873815	DDB_G0272076	eif3L, products: eukaryotic translation initiation factor 3 (eIF3) subunit L
3174.12	0.0614697	0.0963588	0.341028	0.735219	DDB_G0272078	eif3A, products: eukaryotic translation initiation factor 3 (eIF3) subunit A
1256.31	-0.128699	0.104586	0.0667104	0.336322	DDB_G0272080	gacHH, products: Kelch repeat-containing protein, RhoGAP domain-containing protein
113.968	0.0474664	0.149165	0.515518	0.844357	DDB_G0272082	DDB_G0272082, products: SNF2-related domain-containing protein, C3HC4-type zinc finger-containing protein, CHR group protein, helicase, C-terminal domain-containing protein
256.068	-0.240668	0.20816	0.02421	0.17672	DDB_G0272090	DDB_G0272090, products: DUF1206 domain-containing protein
1801.5	0.0959708	0.0946926	0.141897	0.490575	DDB_G0272092	DDB_G0272092, products: ankyrin repeat-containing protein, C2 domain-containing protein, SAM domain-containing protein, protein kinase, TKL group, tyrosine kinase-like protein, ARK family protein kinase
10.3111	0.0751861	0.264262	0.258137	NA	DDB_G0272096	DDB_G0272096, products:
711.615	-0.0197969	0.0912892	0.749679	0.940553	DDB_G0272098	trafP, products: TNF receptor-associated factor P
66.7508	-0.0841054	0.177089	0.286428	0.687138	DDB_G0272100	DDB_G0272100, products:
11.966	0.0156303	0.217234	0.802301	0.952877	DDB_G0272102	DDB_G0272102, products:
1838.95	-0.00655921	0.0968311	0.917555	0.981856	DDB_G0272104	acpB, products: F-actin-capping protein subunit alpha
1799.92	-0.0200415	0.0760454	0.725006	0.935049	DDB_G0272106	arpB, products: actin related protein 2, polyphosphate kinase component, poly P kinase component
74.1934	-0.0733463	0.174503	0.341644	0.735623	DDB_G0272108	DDB_G0272108, products: RNA-binding region RNP-1 domain-containing protein, RNA recognition motif-containing protein RRM
1982.33	-0.0206183	0.0876859	0.735393	0.937368	DDB_G0272110	gskA, products: glycogen synthase kinase 3
2423.38	0.0365806	0.0743608	0.51666	0.844357	DDB_G0272112	myoJ, products: myosin-5b
213.467	0.1928	0.16811	0.0382294	0.238732	DDB_G0272114	orfR1062, products: Uncharacterized protein RSN1
179.838	0.243422	0.219407	0.025271	0.181322	DDB_G0272116	ppp4c, products: protein phosphatase 4 catalytic subunit
258.62	0.0626946	0.131495	0.386214	0.768819	DDB_G0272118	ppp6c, products: protein phosphatase 6 catalytic subunit
849.851	-0.0420382	0.0915573	0.501589	0.835509	DDB_G0272120	rcaA, products: peptidase M41, FtsH domain-containing protein
107.367	-0.0783402	0.17417	0.314681	0.713399	DDB_G0272122	DDB_G0272122, products:
12.7243	0.0125367	0.214189	0.842085	0.965873	DDB_G0272124	kdelr, products: ER lumen protein retaining receptor, KDEL endoplasmic reticulum protein retention receptor
87.142	-0.00766392	0.147691	0.91345	0.981856	DDB_G0272128	DDB_G0272128, products: 3-hydroxyacyl-CoA dehydrogenase type-2, 17-beta-hydroxysteroid dehydrogenase 10
237.583	-0.0171958	0.146513	0.807968	0.95538	DDB_G0272130	DDB_G0272130, products: recoverin family protein
343.86	0.0164094	0.105686	0.802113	0.952877	DDB_G0272138	rab2B, products: Rab GTPase
171.123	0.0167671	0.139179	0.811469	0.955791	DDB_G0272140	DDB_G0272140, products: unknown
30.9066	-0.00939598	0.186812	0.890508	0.976544	DDB_G0272142	DDB_G0272142, products: prokaryotic/mitochondrial release factor family protein
658.62	0.0593368	0.0925326	0.348865	0.741514	DDB_G0272144	DDB_G0272144, products:
9.21899	0.0708194	0.261042	0.280212	NA	DDB_G0272146	DDB_G0272146, products: unknown
195.575	-0.0292388	0.126628	0.673827	0.917629	DDB_G0272148	DDB_G0272148, products:
28.3464	-0.0810884	0.23341	0.274187	0.672257	DDB_G0272150	grlJ, products: G-protein-coupled receptor (GPCR) family 3 protein 9
178.453	-0.0351393	0.221355	0.585575	0.8776	DDB_G0272152	DDB_G0272152, products: unknown
16.7746	0.0141984	0.220949	0.816815	0.958053	DDB_G0272154	DDB_G0272154, products: short-chain dehydrogenase/reductase (SDR) family protein
352.995	0.151461	0.148471	0.0718231	0.35069	DDB_G0272158	wrnip1, products: AAA ATPase domain-containing protein, putative Werner helicase-interacting protein 1
529.593	-0.0482768	0.106606	0.469137	0.821136	DDB_G0272160	DDB_G0272160, products:
36.7962	0.0162835	0.175757	0.815949	0.957562	DDB_G0272164	DDB_G0272164, products:
59.5655	-0.0275091	0.184559	0.694096	0.927081	DDB_G0272170	gnt8, products: putative beta-1,4-mannosyl-glycoprotein beta-1,4-N-acetylglucosaminyltransferase, putative glycosyltransferase, putative GlcNAc transferase
416.455	0.0974411	0.120248	0.180755	0.549377	DDB_G0272172	gnt6, products: putative beta-1,4-mannosyl-glycoprotein beta-1,4-N-acetylglucosaminyltransferase, putative glycosyltransferase, putative GlcNAc transferase
115.906	-0.092366	0.155294	0.239979	0.633294	DDB_G0272174	DDB_G0272174, products:
35.3619	0.0516309	0.194162	0.475555	0.822389	DDB_G0272176	DDB_G0272176, products: las1-like protein
4363.27	0.139806	0.0981007	0.0409957	0.251194	DDB_G0272182	DDB_G0272182, products: putative arginine deiminase
533.288	0.112174	0.11682	0.124085	0.458748	DDB_G0272184	DDB_G0272184, products: zinc-containing alcohol dehydrogenase (ADH)
240.966	0.015563	0.116978	0.817817	0.958335	DDB_G0272186	DDB_G0272186, products: tetratricopeptide-like helical domain-containing protein (TPR), TPR_1 repeat-containing protein
1396.46	-0.0288875	0.0822676	0.626452	0.896802	DDB_G0272190	fam49, products: FAM49 family protein
156.919	0.0523594	0.137734	0.469357	0.821136	DDB_G0272192	cln7, products: Major facilitator superfamily domain-containing protein 8
118.085	-0.0203567	0.138153	0.772295	0.945611	DDB_G0272194	DDB_G0272194, products:
401.91	0.344368	0.174237	0.00218003	0.030492	DDB_G0272196	DDB_G0272196, products: copine family protein
14.712	-0.0991959	0.299943	0.146896	0.499167	DDB_G0272198	DDB_G0272198, products:
1585.94	-0.0888928	0.0806437	0.137435	0.48274	DDB_G0272200	DDB_G0272200, products:
872.197	0.124871	0.119192	0.0935729	0.404586	DDB_G0272202	DDB_G0272202, products: C2H2-type zinc finger-containing protein, RING zinc finger-containing protein, SPla/RYanodine receptor SPRY domain-containing protein
304.42	0.0349326	0.116913	0.608489	0.887126	DDB_G0272206	DDB_G0272206, products:
2597.03	-0.0743426	0.0745061	0.19159	0.565212	DDB_G0272208	idhC, products: isocitrate dehydrogenase (NADP+), isocitrate dehydrogenase (NADP+), cytosolic
2592.75	0.156876	0.0929215	0.019392	0.153149	DDB_G0272210	idhM, products: isocitrate dehydrogenase (NADP+), isocitrate dehydrogenase (NADP+), mitochondrial
920.219	-0.295552	0.131095	0.00135693	0.0209627	DDB_G0272212	DDB_G0272212, products:
27.7779	-0.023974	0.182794	0.731239	0.936958	DDB_G0272216	aslF, products: putative acetyl-CoA synthetase
10.2675	0.0112968	0.239463	0.837676	NA	DDB_G0272218	DDB_G0272218, products:
48.7994	-0.0964094	0.203929	0.233094	0.623962	DDB_G0272220	DDB_G0272220, products: Transmembrane protein 63A
99.0502	-0.0386335	0.149708	0.592806	0.881147	DDB_G0272222	ybl1, products: YB-like 1, DNA polymerase epsilon p17 subunit 3
63.2506	0.0569094	0.161397	0.445499	0.80926	DDB_G0272224	DDB_G0272224, products: NAD+ kinase family protein
94.7353	0.0149126	0.14237	0.832359	0.962727	DDB_G0272226	DDB_G0272226, products:
20.1348	-0.0152216	0.198426	0.819272	0.958837	DDB_G0272230	DDB_G0272230, products: FAD-linked sulfhydryl oxidase ALR
110.877	0.00837643	0.154587	0.90562	0.980339	DDB_G0272232	DDB_G0272232, products: putative transmembrane protein
12.1469	0.00655033	0.226749	0.911646	0.981711	DDB_G0272234	pex2, products: RING zinc finger-containing protein, peroxisomal biogenesis factor 2, peroxin 2
3310.85	0.179413	0.111494	0.017536	0.142515	DDB_G0272236	aspS1, products: aspartyl-tRNA synthetase, aspartate-tRNA ligase
22.3577	-0.0657365	0.225982	0.354586	0.745996	DDB_G0272238	DDB_G0272238, products: unknown
214.742	-0.152618	0.172473	0.0855993	0.387093	DDB_G0272242	cupI, products: ricin B lectin domain-containing protein, cup family protein
501.733	-0.483785	0.201563	0.000400741	0.00735751	DDB_G0272244	far2, products: putative folic acid receptor 2
109.637	0.0178126	0.162191	0.801613	0.952877	DDB_G0272246	prsB, products: phosphoribosyl pyrophosphate synthetase
5286.17	0.0760242	0.0879437	0.222507	0.608541	DDB_G0272248	act16, products: actin
5628.06	0.00314821	0.158532	0.964396	0.992764	DDB_G0272250	rps23, products: 40S ribosomal protein S23
67.9686	-0.154509	0.234714	0.0971855	0.412059	DDB_G0272252	DDB_G0272252, products:
523.07	0.437979	0.156231	0.000171017	0.00366575	DDB_G0272254	DDB_G0272254, products: Kelch repeat-containing protein, galactose oxidase domain-containing protein, protein kinase, TKL group, tyrosine kinase-like protein
92.54	-0.0456142	0.14905	0.531032	0.852336	DDB_G0272260	sppA, products: sphingosine-1-phosphate phosphatase, S1P phosphatase
211.239	-0.254421	0.257197	0.0261068	0.185144	DDB_G0272262	DDB_G0272262, products:
726.283	-0.00384329	0.114466	0.954245	0.990024	DDB_G0272264	DDB_G0272264, products: coiled-coil domain-containing protein
648.69	-0.127762	0.121143	0.0894027	0.395903	DDB_G0272266	ndufa9, products: NADH dehydrogenase [ubiquinone] 1 alpha subcomplex subunit 9, mitochondrial
15.7477	-0.0562476	0.218799	0.420242	0.791729	DDB_G0272276	gnt5, products: putative beta-1,4-mannosyl-glycoprotein beta-1,4-N-acetylglucosaminyltransferase, putative glycosyltransferase, putative GlcNAc transferase
145.986	1.17427	0.265822	6.33463e-08	3.43754e-06	DDB_G0272280	DDB_G0272280, products: AhpC/TSA family protein
2142.54	-0.313019	0.0958635	5.15529e-05	0.00133137	DDB_G0272282	DDB_G0272282, products: MAST family protein kinase DDB_G0272282
18.6032	-0.0500185	0.213226	0.470443	0.821136	DDB_G0272288	DDB_G0272288, products:
24.62	-0.155111	0.29575	0.0849064	0.384719	DDB_G0272290	DDB_G0272290_RTE, products: TRE3-A ORF2
230.894	-0.00519271	0.129312	0.940105	0.986152	DDB_G0272296	sarA, products: GTP-binding protein Sar1A, ARF/SAR superfamily protein
33.6936	0.169847	0.308627	0.0694529	0.343221	DDB_G0272300	aslE, products: putative acetyl-CoA synthetase
158.555	-0.240325	0.210908	0.0249016	0.180174	DDB_G0272302	DDB_G0272302, products:
20.9363	-0.377851	0.465103	0.00913585	0.0898289	DDB_G0272306	fscE, products: G-protein-coupled receptor (GPCR) family protein, frizzled and smoothened-like sans CRD protein
16032.6	-0.0774299	0.122802	0.281637	0.68098	DDB_G0272308	rps29, products: 40S ribosomal protein S29
24.353	0.0129863	0.203046	0.84291	0.965964	DDB_G0272314	DDB_G0272314, products:
1405.84	0.242924	0.129956	0.00526712	0.0602712	DDB_G0272318	DDB_G0272318, products: putative importin subunit alpha B
421.532	0.141971	0.142886	0.0830856	0.380543	DDB_G0272320	snrpb, products: putative small nuclear ribonucleoparticle-associated protein, LSM (like-Sm) domain-containing protein
603.485	0.181047	0.138322	0.0319209	0.212754	DDB_G0272322	DDB_G0272322, products:
232.773	0.224105	0.182709	0.024955	0.180257	DDB_G0272324	sbds, products: Shwachman-Bodian-Diamond syndrome protein
258.11	0.0222931	0.118256	0.742843	0.938816	DDB_G0272326	nudE, products: Lis-interacting protein
255.174	0.368004	0.223238	0.00389706	0.0480768	DDB_G0272328	DDB_G0272328, products:
9.09085	-0.114592	0.322846	0.103298	NA	DDB_G0272338	DDB_G0272338, products: unknown
199.04	-0.14173	0.17364	0.105106	0.428235	DDB_G0272340	trafG, products: TNF receptor-associated factor G
448.264	0.103531	0.122861	0.161117	0.520689	DDB_G0272342	DDB_G0272342, products: heat shock protein DnaJ family protein
1946.02	-0.00982166	0.0771045	0.86399	0.97033	DDB_G0272344	htt, products: Huntington's disease protein homolog
416.774	0.146186	0.138262	0.0718791	0.350709	DDB_G0272346	mcfQ, products: transmembrane protein, mitochondrial substrate carrier family protein
162.642	-0.0806984	0.144518	0.287828	0.687913	DDB_G0272348	trafI, products: TNF receptor-associated factor I
2866.26	-0.091246	0.092166	0.155838	0.511366	DDB_G0272350	sgkC, products: sphingosine kinase related protein
9200.62	-0.0144005	0.0712142	0.793225	0.950806	DDB_G0272354	spt6, products: SH2 domain-containing protein
4500.87	-0.172063	0.117475	0.0257669	0.183645	DDB_G0272356	DDB_G0272356, products: Double C2-like domain-containing protein beta
168.762	-0.0994013	0.154005	0.210059	0.590591	DDB_G0272358	DDB_G0272358, products:
1065.1	-0.0211226	0.0863079	0.727376	0.936604	DDB_G0272360	taf9, products: transcription initiation factor TFIID subunit, TFIID subunit
102.145	0.0488441	0.141328	0.500302	0.835509	DDB_G0272362	gtf2h2, products: TFIIH subunit, general transcription factor IIH component
231.044	-0.243952	0.193581	0.0198258	0.155665	DDB_G0272364	DDB_G0272364, products: EGF-like domain-containing protein
298.169	-0.0225516	0.117154	0.739324	0.937856	DDB_G0272368	ndm, products: macropinocytosis suppressor Ndm
14.478	-0.0730293	0.237118	0.305014	0.703386	DDB_G0272370	DDB_G0272370, products:
1456.75	-0.197001	0.119672	0.0134312	0.118234	DDB_G0272372	gxcM, products: pleckstrin homology (PH) domain-containing protein, RhoGEF domain-containing protein, DH domain-containing protein
966.835	0.0837028	0.101884	0.212239	0.59249	DDB_G0272374	prpf6, products: TPR repeat-containing protein, U5 small nuclear ribonucleoprotein-associated protein, PRP1 splicing factor domain-containing protein, pre-mRNA processing factor 6
896.286	-0.0788613	0.114053	0.260376	0.656029	DDB_G0272382	DDB_G0272382, products:
101.439	-0.0306918	0.150266	0.668412	0.914619	DDB_G0272384	DDB_G0272384, products: ATP-dependent DNA helicase RecQ family protein, Bloom syndrome-like protein
119.056	-0.233557	0.229712	0.0311578	0.210192	DDB_G0272386	DDB_G0272386, products: Kelch repeat-containing protein, cyclin-like F-box containing protein
1323.97	-0.0282355	0.0817624	0.633206	0.899245	DDB_G0272388	DDB_G0272388, products:
509.186	-0.0914975	0.121064	0.207355	0.586832	DDB_G0272394	ndufa5, products: NADH dehydrogenase [ubiquinone] 1 alpha subcomplex subunit 5
250.02	0.253821	0.207317	0.0193862	0.153149	DDB_G0272396	DDB_G0272396, products: putative transmembrane protein
36.1828	0.0487682	0.187822	0.501322	0.835509	DDB_G0272398	DDB_G0272398, products:
11.8865	-0.106119	0.30138	0.135845	0.479586	DDB_G0272400	DDB_G0272400_RTE, products: TRE3-B
12.831	0.115494	0.306814	0.119092	0.451757	DDB_G0272404	DDB_G0272404, products:
3129.92	-0.0600229	0.0772442	0.299782	0.699609	DDB_G0272406	DDB_G0272406, products:
359.888	0.137582	0.143925	0.0922556	0.40234	DDB_G0272416	DDB_G0272416, products: unknown
591.979	-0.0547372	0.105738	0.412363	0.786213	DDB_G0272418	DDB_G0272418, products: thioredoxin fold domain-containing protein
310.536	-0.00856082	0.11708	0.899016	0.978534	DDB_G0272422	gnt7, products: putative beta-1,4-mannosyl-glycoprotein beta-1,4-N-acetylglucosaminyltransferase, putative glycosyltransferase, putative GlcNAc transferase
36.2236	-0.049945	0.193531	0.488691	0.828641	DDB_G0272424	DDB_G0272424, products: GCN5-related N-acetyltransferase
23.8566	0.0101953	0.195116	0.878906	0.974541	DDB_G0272432	DDB_G0272432, products:
249.602	-0.0101498	0.125856	0.882643	0.975702	DDB_G0272434	DDB_G0272434, products:
24.5761	-0.0307974	0.196508	0.653746	0.908463	DDB_G0272436	DDB_G0272436, products:
282.321	0.221827	0.168339	0.0215051	0.164336	DDB_G0272440	DDB_G0272440, products: putative quinone oxidoreductase, alcohol dehydrogenase
47.9254	-0.0200329	0.164859	0.777603	0.946369	DDB_G0272448	DDB_G0272448_RTE, products: TRE3-A ORF1
780.51	-0.110698	0.107521	0.114651	0.445163	DDB_G0272450	DDB_G0272450, products:
68.6458	0.170723	0.228999	0.0772422	0.367056	DDB_G0272454	trafA, products: TNF receptor-associated factor A
573.753	-0.0449342	0.0919165	0.473856	0.821996	DDB_G0272456	DDB_G0272456, products: HEAT repeat-containing protein, armadillo-like helical domain-containing protein
916.739	-0.185991	0.1466	0.0328046	0.21661	DDB_G0272460	DDB_G0272460, products:
319.939	-0.0103895	0.114701	0.876927	0.973809	DDB_G0272462	qprt, products: nicotinate-nucleotide diphosphorylase (carboxylating)
15.8681	0.0216574	0.211824	0.73681	0.937377	DDB_G0272466	DDB_G0272466, products: short-chain dehydrogenase/reductase (SDR) family protein, glucose/ribitol dehydrogenase family protein
380.303	0.0252111	0.10905	0.704032	0.929725	DDB_G0272470	DDB_G0272470, products: Protein SMG8
3059.41	-0.0875902	0.0771497	0.133184	0.475542	DDB_G0272472	DDB_G0272472, products: calponin homology (CH) domain-containing protein DDB_G0272472
16.3921	0.0781719	0.24342	0.275533	0.673053	DDB_G0272474	DDB_G0272474, products:
1052.38	0.0263485	0.102093	0.684776	0.923108	DDB_G0272476	DDB_G0272476, products: putative NADH dehydrogenase (ubiquinone), putative NADH-ubiquinone oxidoreductase 8B subunit
520.716	-0.0125385	0.102482	0.846412	0.967798	DDB_G0272480	DDB_G0272480, products:
107.759	-0.0389704	0.139583	0.585878	0.8776	DDB_G0272484	DDB_G0272484, products: HD phosphohydrolase domain-containing protein
1575.78	-0.0598116	0.0760088	0.297129	0.698351	DDB_G0272486	sec7, products: Arf guanyl-nucleotide exchange factor Sec7
1191.41	-0.284161	0.147134	0.00340672	0.0432729	DDB_G0272492	DDB_G0272492, products:
723.398	-0.365363	0.18319	0.00187112	0.0270996	DDB_G0272494	DDB_G0272494, products:
12.5627	-0.0469116	0.237472	0.459185	0.816816	DDB_G0272496	DDB_G0272496, products:
95.1249	-0.0550555	0.150922	0.456058	0.815196	DDB_G0272498	osbD, products: oxysterol binding family protein, member 4
4542.72	0.0143511	0.0858002	0.812087	0.955791	DDB_G0272502	DDB_G0272502, products:
198.125	0.0231663	0.117467	0.732758	0.936958	DDB_G0272504	DDB_G0272504, products:
24.8669	0.0584623	0.224774	0.398757	0.776453	DDB_G0272506	DDB_G0272506, products:
295.735	-0.171122	0.156068	0.0516233	0.285447	DDB_G0272516	DDB_G0272516, products:
134.626	-0.0753841	0.17987	0.330437	0.728208	DDB_G0272518	DDB_G0272518, products:
34421.3	-0.0765379	0.0736796	0.176211	0.543075	DDB_G0272520	act15, products: actin
61.8802	0.0106653	0.154565	0.880105	0.974998	DDB_G0272522	sgkA, products: sphingosine kinase
1668.38	0.535903	0.106749	3.05307e-08	1.80531e-06	DDB_G0272524	malA, products: NADP-dependent malate dehydrogenase (oxaloacetate-decarboxylating), NADP malic enzyme
2007.61	-0.22326	0.12198	0.00680902	0.073067	DDB_G0272532	DDB_G0272532, products:
913.867	-0.354069	0.135796	0.000390854	0.00719139	DDB_G0272534	DDB_G0272534, products:
253.157	0.185499	0.174474	0.0470478	0.272396	DDB_G0272542	prkag, products: CBS (cystathionine-beta-synthase) domain-containing protein, AMP-activated protein kinase gamma subunit, AMPK complex gamma subunit
33.2223	-3.2008e-05	0.183373	0.999627	0.999861	DDB_G0272544	DDB_G0272544, products: reduced folate carrier family protein
659.804	-0.574732	0.131566	4.96916e-07	2.14098e-05	DDB_G0272548	DDB_G0272548_RTE, products: TRE5-A ORF1
5558.68	-0.228838	0.099816	0.00190863	0.0275185	DDB_G0272550	DDB_G0272550, products: putative peptide/oligopeptide transporter
504.817	-1.92993	0.163825	1.3023e-33	6.97871e-31	DDB_G0272554	DDB_G0272554_RTE, products: DIRS1 ORF2 fragment
4424.73	-0.0509078	0.0755308	0.372195	0.757464	DDB_G0272558	DDB_G0272558, products:
5218.1	-0.00359288	0.0734346	0.948721	0.988174	DDB_G0272560	capA-1, products: cAMP-binding protein
2180.62	-0.0443175	0.0920861	0.480183	0.825329	DDB_G0272562	csbB, products: contact site B protein B
65.3521	-0.0345968	0.168702	0.630737	0.898848	DDB_G0272564	psmD8-1, products: 26S proteasome regulatory subunit S14, 26S proteasome non-ATPase regulatory subunit 8
156.893	0.266693	0.216068	0.0171186	0.140216	DDB_G0272566	psmD14, products: 26S proteasome non-ATPase regulatory subunit 14, putative multidrug resistance protein
114.526	0.745313	0.292483	8.28942e-05	0.00202489	DDB_G0272576	DDB_G0272576, products:
630.25	0.0684333	0.110825	0.319074	0.717665	DDB_G0272578	ap3b-1, products: beta adaptin
177.51	0.0101906	0.146289	0.885092	0.975702	DDB_G0272580	DDB_G0272580, products: RWD domain-containing protein, DRG family-regulatory protein 2
4.71503	0.031435	0.26789	0.511135	NA	DDB_G0272584	maoC-1, products: amine oxidase (flavin-containing), monoamine oxidase
29.0396	0.155138	0.269028	0.0919116	0.401861	DDB_G0272586	DDB_G0272586, products: unknown
202.511	-0.0322019	0.133659	0.647793	0.90632	DDB_G0272590	srp14-1, products: signal recognition particle 14 kDa subunit
33.2121	-0.03153	0.189215	0.651594	0.907754	DDB_G0272592	DDB_G0272592, products: EGF-like domain-containing protein
2064.88	0.0204408	0.0901308	0.740532	0.938278	DDB_G0272600	DDB_G0272600, products: Hermansky-Pudlak syndrome 5 protein ortholog
76.5851	-0.132162	0.200633	0.13376	0.476707	DDB_G0272602	DDB_G0272602, products:
70.8975	-0.0476927	0.162455	0.516485	0.844357	DDB_G0272604	cyp508A2-1, products: cytochrome P450 family protein
16.9093	-0.0128117	0.217125	0.836797	0.96481	DDB_G0272606	DDB_G0272606, products:
159.09	0.0183607	0.121734	0.788286	0.949531	DDB_G0272608	stip-1, products: sip1/TFIP11-like interaction protein
357.124	-0.0176321	0.105067	0.787367	0.949224	DDB_G0272612	DDB_G0272612, products:
929.924	0.0332822	0.100581	0.60716	0.886696	DDB_G0272614	DDB_G0272614, products: DUF1794 family protein
67.0936	0.0517421	0.158347	0.483758	0.827097	DDB_G0272616	rnrB-1, products: ribonucleoside-diphosphate reductase, small subunit
3275.84	0.225974	0.113569	0.00444785	0.0531881	DDB_G0272618	tkt-1, products: transketolase
599.072	-0.00206666	0.0986478	0.974153	0.994743	DDB_G0272620	hsbp1-1, products: heat shock factor-binding protein 1
472.489	0.00512972	0.101951	0.936658	0.986152	DDB_G0272622	DDB_G0272622, products:
1350.46	0.14266	0.119311	0.059625	0.312218	DDB_G0272624	adrm1-1, products: adhesion regulating molecule family protein
286.976	-0.0992468	0.136826	0.194663	0.567893	DDB_G0272628	DDB_G0272628, products: zinc-containing alcohol dehydrogenase (ADH)
77.9989	-0.0351696	0.168021	0.6255	0.896229	DDB_G0272630	DDB_G0272630, products:
126.288	-0.160545	0.189213	0.0814456	0.376247	DDB_G0272632	DDB_G0272632, products: putative glutathione S-transferase alpha-2
144.719	-0.0251967	0.135153	0.719979	0.934112	DDB_G0272634	dohh-1, products: PBS lyase HEAT-like repeat-containing protein, deoxyhypusine monooxygenase, deoxyhypusine hydroxylase, deoxyhypusine dioxygenase
203.484	0.154762	0.163477	0.0770994	0.366639	DDB_G0272636	DDB_G0272636, products:
386.597	0.000215979	0.113001	0.997417	0.999679	DDB_G0272638	DDB_G0272638, products: phosphatidylinositol-4-phosphate 5-kinase (PIP5K) family protein
12.872	-0.105945	0.299431	0.138306	0.48362	DDB_G0272640	DDB_G0272640, products:
8.51488	-0.00436029	0.234305	0.938464	NA	DDB_G0272648	DDB_G0272648, products:
472.389	0.0070076	0.105301	0.91451	0.981856	DDB_G0272650	DDB_G0272650, products:
3084.03	-0.0112231	0.0785169	0.846231	0.967798	DDB_G0272660	serS, products: seryl-tRNA synthetase, serine-tRNA ligase
38.197	0.00869819	0.17344	0.900862	0.978712	DDB_G0272662	DDB_G0272662, products: putative protein tyrosine phosphatase, dual specificity
364.755	-0.353235	0.205037	0.00367387	0.045918	DDB_G0272664	DDB_G0272664, products:
508.581	0.130148	0.121047	0.0841755	0.383079	DDB_G0272666	DDB_G0272666, products: putative ankyrin repeat protein
464.3	0.0614898	0.111363	0.368838	0.755935	DDB_G0272668	ppr2, products: protein phosphatase 4 regulatory subunit 2
1483.27	0.0114991	0.0813955	0.845214	0.96728	DDB_G0272676	sf3a1, products: ubiquitin domain-containing protein, splicing factor 3A subunit 1
323.969	0.0680243	0.111031	0.322157	0.719129	DDB_G0272678	DDB_G0272678, products: Phosphatidylethanolamine N-methyltransferase
720.8	0.0278001	0.094437	0.659229	0.910638	DDB_G0272680	DDB_G0272680, products: protein phosphatase 2C
247.365	0.0574156	0.12105	0.413305	0.78649	DDB_G0272682	DDB_G0272682, products: endonuclease/exonuclease/phosphatase domain-containing protein, cry34 related protein
705.398	0.133561	0.137149	0.0941675	0.405521	DDB_G0272684	qdpr, products: dihydropteridine reductase
155.824	0.17856	0.204347	0.0645843	0.331653	DDB_G0272686	DDB_G0272686, products: unknown
261.704	-0.102605	0.147909	0.192847	0.566063	DDB_G0272690	DDB_G0272690, products:
173.22	-0.11815	0.153938	0.147274	0.499693	DDB_G0272694	gacH, products: RhoGAP domain-containing protein
5302.32	-0.0616396	0.0693826	0.257098	0.652562	DDB_G0272696	DDB_G0272696, products:
43.5961	0.032684	0.179754	0.645416	0.904511	DDB_G0272700	DDB_G0272700, products:
25.4762	0.0724441	0.204811	0.337214	0.733181	DDB_G0272710	nat9, products: N-acetyltransferase 9
2087.88	-0.122643	0.223647	0.153862	0.509572	DDB_G0272718	DDB_G0272718, products: unknown
3817.5	-0.486717	0.139541	1.84254e-05	0.000544757	DDB_G0272720	DDB_G0272720, products: unknown
4393.75	0.0187158	0.0892238	0.760667	0.943007	DDB_G0272724	DDB_G0272724, products: unknown
52.7846	-0.151694	0.229579	0.101227	0.420505	DDB_G0272726	DDB_G0272726, products:
200.057	0.00971814	0.114209	0.884663	0.975702	DDB_G0272730	alg2, products: glycosyltransferase, alpha-1,3-mannosyltransferase
274.184	0.00669344	0.119905	0.921449	0.982662	DDB_G0272732	emg1, products: putative ribosome biogenesis protein
19.3418	-0.0241178	0.200637	0.719189	0.934046	DDB_G0272736	tgrN1, products: immunoglobulin E-set domain-containing protein
80.7447	0.323517	0.272283	0.0114547	0.105741	DDB_G0272738	iunH, products: N-D-ribosylpurine ribohydrolase, inosine-uridine nucleoside N-ribohydrolase
375.735	-0.0819715	0.126284	0.261293	0.657181	DDB_G0272740	DDB_G0272740, products: putative histone-like transcription factor
22.2585	0.0965523	0.266149	0.191991	0.565262	DDB_G0272746	DDB_G0272746, products:
41.3251	-0.108648	0.209484	0.192244	0.565262	DDB_G0272748	DDB_G0272748, products:
713.712	0.0343226	0.0944913	0.587082	0.877863	DDB_G0272754	gsr, products: glutathione reductase, glutathione-disulfide reductase
397.884	-0.045942	0.105029	0.487873	0.828641	DDB_G0272756	csbC, products: contact site B protein
254.282	0.0806085	0.134891	0.278914	0.677195	DDB_G0272758	chtf18, products: chromosome transmission fidelity protein 18 homolog
130.68	-0.0335226	0.15601	0.641644	0.902857	DDB_G0272760	mcm6, products: MCM family protein, putative DNA replication licensing factor
1416.34	-0.126151	0.0932093	0.0558735	0.300582	DDB_G0272765	DDB_G0272765, products:
37.3578	-0.0114384	0.173157	0.870106	0.971265	DDB_G0272767	DDB_G0272767, products:
235.97	-0.162814	0.161605	0.0647498	0.331841	DDB_G0272769	DDB_G0272769, products:
922.433	-2.86189e-05	0.086838	0.999623	0.999861	DDB_G0272771	wdr7, products: WD40 repeat-containing protein
269.593	0.0992117	0.136368	0.194292	0.567199	DDB_G0272775	anapc8, products: anaphase promoting complex subunit 8
16.0499	0.00136859	0.196061	0.983577	0.995772	DDB_G0272777	DDB_G0272777, products: AAA ATPase domain-containing protein
45.6989	-0.053176	0.185662	0.469025	0.821136	DDB_G0272781	pmmB, products: phosphomannomutase B
271.731	-0.894653	0.233446	8.3297e-07	3.32181e-05	DDB_G0272783	rliA, products: major facilitator superfamily protein
1466.61	-0.163065	0.103577	0.022814	0.170705	DDB_G0272785	DDB_G0272785, products: acyloxyacyl hydrolase
56.254	0.166571	0.230174	0.0820213	0.376935	DDB_G0272787	sds, products: L-serine ammonia-lyase, L-serine dehydratase, serine deaminase
689.366	0.0757934	0.123003	0.291401	0.692291	DDB_G0272789	rlp24, products: ribosomal protein L24-like protein, putative ribosome biogenesis protein rlp24
642.611	-0.0113607	0.0885741	0.852695	0.968892	DDB_G0272791	rsc11-1, products: alpha/beta hydrolase fold-1 domain-containing protein
71.9571	-0.285899	0.296393	0.0197066	0.155155	DDB_G0272793	DDB_G0272793, products:
117.898	-1.24149	0.299251	2.15155e-07	1.03637e-05	DDB_G0272795	3B-1, products: prespore-specific protein
3642.31	-0.000958076	0.0754014	0.986509	0.996609	DDB_G0272797	DDB_G0272797, products: putative protein serine/threonine kinase, CDK family protein kinase, protein kinase, CMGC group
73.8657	0.539211	0.335399	0.00151814	0.0229568	DDB_G0272799	icmA-1, products: protein-S-isoprenylcysteine O-methyltransferase
364.334	0.0954247	0.12498	0.195716	0.56971	DDB_G0272801	DDB_G0272801, products:
19.0673	-0.0252593	0.20424	0.704179	0.929725	DDB_G0272805	DDB_G0272805, products: EGF-like domain-containing protein
75.9489	0.0433236	0.162932	0.55299	0.864113	DDB_G0272807	DDB_G0272807, products: Putative glycerophosphodiester phosphodiesterase 5
16.7621	-0.15273	0.318082	0.0787202	0.369834	DDB_G0272809	DDB_G0272809, products:
13.2657	-0.156135	0.323564	0.0741114	0.357788	DDB_G0272811	wasB, products: WASP-related protein B
209.129	0.143617	0.159804	0.0931647	0.404453	DDB_G0272813	cdk1, products: p34-cdc2 protein, protein serine/threonine kinase, CDK family protein kinase, cyclin-dependent kinase, protein kinase, CMGC group, CDC2 subfamily protein kinase
338.606	0.70597	0.180058	1.37399e-06	5.2358e-05	DDB_G0272815	cprE, products: cysteine proteinase 5
5543.07	0.06312	0.0859774	0.303005	0.701395	DDB_G0272819	hspC, products: heat shock protein
107.417	-0.0195431	0.137669	0.780937	0.947452	DDB_G0272823	DDB_G0272823, products:
52425.8	-0.0377037	0.0642613	0.465578	0.819869	DDB_G0272825	rps4, products: 40S ribosomal protein S4
8.34807	0.0138212	0.235695	0.80756	NA	DDB_G0272827	cbpI, products: EF-hand domain-containing protein
314.87	0.128561	0.157141	0.122666	0.456483	DDB_G0272831	psmA7, products: proteasome subunit alpha type 7, 20S proteasome subunit alpha-7
397.5	-0.0952669	0.117022	0.184914	0.554928	DDB_G0272833	csbA, products: contact site B protein A
67.9229	0.207017	0.251565	0.0481551	0.275828	DDB_G0272835	plip, products: phosphatidylinositol phosphatase, phosphoinositide phosphatase, phospholipid-inositol phosphatase
454.281	-0.0887712	0.112637	0.206858	0.586645	DDB_G0272837	ifkA, products: PEK family protein kinase IfkA
30.1496	0.0247079	0.18675	0.721724	0.934586	DDB_G0272839	DDB_G0272839, products: histidine triad (HIT) family protein
167.312	-0.0179324	0.129818	0.796186	0.951959	DDB_G0272841	DDB_G0272841, products: acid phosphatase
144.276	-0.00121116	0.146245	0.986272	0.996609	DDB_G0272845	DDB_G0272845, products: AB-hydrolase associated lipase region containing protein
92.9816	-0.655554	0.311838	0.000335324	0.00640326	DDB_G0272849	DDB_G0272849, products: EGF-like domain-containing protein
88.6021	-0.000636279	0.140032	0.992753	0.998166	DDB_G0272857	rapB, products: Ras GTPase
64.6145	-0.264288	0.279612	0.0245207	0.178624	DDB_G0272859	pks14, products: putative polyketide synthase, beta-ketoacyl synthase family protein
406.92	-0.0464843	0.127051	0.509605	0.840745	DDB_G0272861	cosA, products: actin regulatory protein costars
24.9952	0.0772054	0.22395	0.299426	0.699609	DDB_G0272863	DDB_G0272863, products:
43.7777	-0.0643293	0.179665	0.394913	0.773732	DDB_G0272865	DDB_G0272865, products:
1595.16	0.511825	0.104081	5.475e-08	3.00915e-06	DDB_G0272867	argS1, products: arginyl-tRNA synthetase, arginine-tRNA ligase
678.876	0.00276443	0.0931571	0.964674	0.992931	DDB_G0272869	sun1, products: SUN domain-containing protein 1
65.9785	0.000251424	0.157189	0.997156	0.999679	DDB_G0272871	ssu72, products: RNA polymerase II subunit A C-terminal domain phosphatase, CTD phosphatase, SSU72 phosphatase family protein
159.789	-0.146926	0.177394	0.0975676	0.41215	DDB_G0272875	cpnB-1, products: copine B
47.4762	-0.418325	0.393224	0.00644958	0.0699984	DDB_G0272877	DDB_G0272877, products: coiled-coil domain-containing protein
312.007	0.155003	0.15034	0.067953	0.339193	DDB_G0272883	ksrA-1, products: 3-ketosphinganine reductase
29.1082	0.0424184	0.190468	0.551473	0.864113	DDB_G0272885	fslJ-1, products: frizzled and smoothened-like protein J
183.881	0.153422	0.159894	0.0768565	0.366093	DDB_G0272889	surf1-1, products: surf1 family protein
35038.3	0.0275543	0.0794055	0.636545	0.901442	DDB_G0272893	rpl15-1, products: S60 ribosomal protein L15
29.5035	-0.095008	0.238948	0.219975	0.605449	DDB_G0272897	DDB_G0272897, products: EGF-like domain-containing protein
21.0943	-0.430657	0.558647	0.00553163	0.0623235	DDB_G0272901	DDB_G0272901, products: EGF-like domain-containing protein
18.8973	-0.0741397	0.249328	0.28464	0.684574	DDB_G0272905	rabF1-1, products: Rab GTPase
172.387	-0.00578637	0.123683	0.932594	0.984737	DDB_G0272913	DDB_G0272913, products: putative alanyl-tRNA synthetase
50.0278	0.0933521	0.205123	0.243978	0.638781	DDB_G0272917	DDB_G0272917, products:
356.866	0.150673	0.151571	0.0753461	0.36162	DDB_G0272919	DDB_G0272919, products: unknown
69.0968	-0.105074	0.196713	0.204595	0.58373	DDB_G0272921	DDB_G0272921, products:
1107.49	-0.0321746	0.0934334	0.608769	0.887231	DDB_G0272925	gacU, products: RhoGAP domain-containing protein
25.8509	-0.0138918	0.206735	0.830252	0.96262	DDB_G0272931	timm9, products: mitochondrial import inner membrane translocase subunit 9
36.8888	0.0110677	0.172812	0.874306	0.97304	DDB_G0272933	DDB_G0272933, products: unknown
23.6212	0.00733481	0.19264	0.91313	0.981856	DDB_G0272935	mocos, products: molybdenum cofactor sulfurase
11.6079	-0.0122527	0.238558	0.825486	0.961124	DDB_G0272939	DDB_G0272939, products: unknown
4974.06	-0.690241	0.109093	6.09751e-12	7.57681e-10	DDB_G0272947	DDB_G0272947, products: unknown
773.098	0.264074	0.154505	0.00666917	0.0720169	DDB_G0272949	DDB_G0272949, products:
78.7077	0.0748594	0.178925	0.333312	0.730152	DDB_G0272951	DDB_G0272951, products:
26.1038	-0.106761	0.233069	0.189518	0.562507	DDB_G0272953	DDB_G0272953, products:
176.526	0.391352	0.252354	0.00401993	0.0491682	DDB_G0272955	DDB_G0272955, products: putative phytanoyl-CoA dioxygenase
13.4964	-0.00889865	0.205263	0.89078	0.976669	DDB_G0272957	DDB_G0272957, products: Protein FRA10AC1
133.52	-0.183362	0.192188	0.0560567	0.300582	DDB_G0272965	DDB_G0272965, products:
304.802	0.245559	0.20816	0.0223588	0.168896	DDB_G0272969	psmB1, products: proteasome subunit beta type 1, 20S proteasome subunit beta-1
298.852	-0.0162438	0.123768	0.812841	0.956255	DDB_G0272971	DDB_G0272971, products:
62.3016	-0.0568034	0.176896	0.445894	0.809807	DDB_G0272973	DDB_G0272973, products:
71.0012	-0.0892118	0.196291	0.262672	0.658523	DDB_G0272979	DDB_G0272979, products:
17.0629	0.033504	0.216729	0.607271	0.886707	DDB_G0272981	pks13, products: putative polyketide synthase, beta-ketoacyl synthase family protein
249.224	-0.0110108	0.11414	0.869462	0.971092	DDB_G0272983	DDB_G0272983, products: DNAJ heat shock N-terminal domain-containing protein
120.473	0.0570602	0.165811	0.444941	0.80876	DDB_G0272985	vps54, products: vacuolar protein sorting 54 family protein
314.414	-0.0591585	0.126018	0.40597	0.781322	DDB_G0272987	irlA, products: putative protein serine/threonine kinase, IRE family protein kinase
7943.01	-0.0826086	0.0764589	0.153882	0.509572	DDB_G0272989	vps5, products: Phox domain-containing protein, putative sorting nexin
385.24	-0.0198941	0.115575	0.767968	0.944891	DDB_G0272991	exoc7, products: exocyst complex subunit 7
20.7177	-0.615818	0.642496	0.00200881	0.0286105	DDB_G0272993	DDB_G0272993, products:
661.765	0.0189365	0.0921472	0.761063	0.943007	DDB_G0272995	DDB_G0272995, products:
1153.05	-0.0306099	0.0831894	0.608077	0.886977	DDB_G0272997	DDB_G0272997, products:
44.5008	-0.00185557	0.169421	0.978858	0.994743	DDB_G0272999	pkd2, products: polycystin-2
141.973	-0.0588704	0.132872	0.415202	0.787941	DDB_G0273003	snrpD3, products: LSM (like-Sm) domain-containing protein, putative small nuclear ribonucleoprotein D3
181.921	-0.157133	0.17905	0.0820342	0.376935	DDB_G0273007	pks15, products: putative polyketide synthase, beta-ketoacyl synthase family protein
37.3972	0.00444767	0.16718	0.94948	0.988174	DDB_G0273009	DDB_G0273009, products:
271.598	0.098583	0.142213	0.202953	0.581081	DDB_G0273013	uglB, products: uracil glycosylase, uracil-DNA glycosylase
13.8746	-0.156722	0.32734	0.0721918	0.351689	DDB_G0273017	DDB_G0273017, products: isocitrate lyase
281.278	-0.00920855	0.121304	0.892464	0.977459	DDB_G0273027	DDB_G0273027, products: RNA (guanine-9-)-methyltransferase domain-containing protein 2
20.3148	0.00554805	0.220278	0.927396	0.983715	DDB_G0273029	DDB_G0273029, products:
52.5585	0.0553587	0.200432	0.444105	0.80854	DDB_G0273031	DDB_G0273031, products: 2-aminoethanethiol dioxygenase
18.8588	0.0497934	0.238718	0.435815	0.803071	DDB_G0273033	DDB_G0273033, products: leucine-rich repeat-containing protein (LRR), regulator of G protein signalling (RGS) domain-containing protein
185.268	0.00619592	0.128354	0.928458	0.983715	DDB_G0273037	ptcJ-1, products: pentatricopeptide repeat-containing protein J
31.1492	-0.0924754	0.213358	0.244048	0.638781	DDB_G0273039	iptC-1, products: putative isopentenyltransferase C
510.297	-0.00925867	0.0914197	0.881249	0.975325	DDB_G0273041	DDB_G0273041, products: SH3 domain-containing protein
80.3939	-0.0381101	0.149186	0.59747	0.883214	DDB_G0273043	DDB_G0273043, products: EGF-like domain-containing protein
35.0505	0.00483362	0.184531	0.943698	0.986219	DDB_G0273047	cyp508A3-1, products: cytochrome P450 family protein
3248.28	0.137047	0.0866379	0.0314808	0.21166	DDB_G0273051	drnA-1, products: putative RNAse III DrnA
441.276	-0.15572	0.133625	0.0541264	0.295028	DDB_G0273053	DDB_G0273053, products: SNF2-related domain-containing protein, putative DEAD/DEAH box helicase
2967.08	-0.0080067	0.0735107	0.886112	0.975702	DDB_G0273059	cak1-1, products: casein kinase I
1330.02	0.112169	0.103522	0.10398	0.426181	DDB_G0273061	cinD-1, products: putative helix-turn-helix transcription factor
3376.11	0.148594	0.108897	0.0411077	0.251396	DDB_G0273063	dscA-1, products: discoidin I, alpha chain
15251.4	0.322237	0.101482	6.94309e-05	0.00173557	DDB_G0273065	dscC-1, products: discoidin I, beta/gamma chain
11941.1	0.597423	0.0847013	9.72406e-14	1.51589e-11	DDB_G0273067	dscD-1, products: discoidin I, delta chain
11116.4	0.123488	0.146708	0.126639	0.463622	DDB_G0273069	ndkC-1, products: nucleoside diphosphate kinase, NDP kinase
450.422	0.0348274	0.107581	0.599772	0.884494	DDB_G0273071	vatD-1, products: vacuolar ATPase subunit D
194.77	-0.942092	0.248954	9.03816e-07	3.58765e-05	DDB_G0273073	abcG17-1, products: ABC transporter G family protein
90.8465	-0.0380396	0.159501	0.59966	0.884481	DDB_G0273075	DDB_G0273075, products: armadillo repeat-containing protein
92.2013	0.307089	0.293124	0.0152834	0.130129	DDB_G0273077	DDB_G0273077, products:
42.2626	0.0673446	0.209712	0.361391	0.75135	DDB_G0273079	DDB_G0273079, products: unknown
33.0038	0.0162331	0.179639	0.815459	0.957511	DDB_G0273083	DDB_G0273083, products: Dyp-type peroxidase family protein
65.2692	-0.0797779	0.170024	0.306543	0.704827	DDB_G0273085	DDB_G0273085, products:
98.5293	0.419745	0.284693	0.00379894	0.0471157	DDB_G0273089	coq10-1, products: putative coenzyme Q-binding protein
1254.71	0.306641	0.138291	0.00142093	0.0217943	DDB_G0273093	DDB_G0273093, products: heat shock protein 70 (Hsp70) family member
3934.81	0.121979	0.084199	0.0498824	0.280638	DDB_G0273095	DDB_G0273095, products: PDAP1 family protein
274.66	0.0515714	0.124528	0.463944	0.819839	DDB_G0273097	ptpA1-1, products: protein-tyrosine phosphatase 1
4050.62	-0.0560373	0.0750578	0.324801	0.721463	DDB_G0273101	DDB_G0273101, products: armadillo-like helical domain-containing protein, SEC7-like domain-containing protein
9805.43	-0.49857	0.0875643	9.82722e-10	8.86932e-08	DDB_G0273105	scdB-1, products: delta 9 fatty acid desaturase ScdB
205.009	-0.06334	0.121483	0.370013	0.755935	DDB_G0273107	fip-1, products: filament-interacting protein
341.369	0.0735879	0.120943	0.301738	0.700723	DDB_G0273109	DDB_G0273109, products: Craniofacial development protein 1
57.9425	-0.00812119	0.171509	0.907601	0.980689	DDB_G0273115	DDB_G0273115, products:
134.536	0.194396	0.225545	0.0544809	0.295458	DDB_G0273117	ublcp1-1, products: ubiquitin-like domain-containing CTD phosphatase 1
69.6663	0.0403264	0.17036	0.578245	0.875384	DDB_G0273119	DDB_G0273119, products: endosulfine superfamily protein
208.156	-0.00780313	0.118086	0.908118	0.980877	DDB_G0273121	pakH-1, products: STE20 family protein kinase PakH
10.7526	0.0659896	0.259734	0.303153	NA	DDB_G0273125	DDB_G0273125, products: Tyrosyl-DNA phosphodiesterase 1
3734.27	-0.0567056	0.0852663	0.35163	0.742722	DDB_G0273127	hbx5-1, products: homeobox transcription factor Hbx5
1585.48	0.0560645	0.0815235	0.346124	0.739926	DDB_G0273131	g6pd-1, products: glucose 6-phosphate-1-dehydrogenase
11.8173	-0.0119716	0.234608	0.833383	0.962995	DDB_G0273135	DDB_G0273135, products:
698.923	-0.0149523	0.0987164	0.814989	0.957091	DDB_G0273137	DDB_G0273137, products: mRNA-decapping enzyme subunit 2
361.148	0.00176144	0.105288	0.978463	0.994743	DDB_G0273139	rad51-1, products: putative DNA repair protein 51
13.394	-0.0178927	0.219879	0.772835	0.945611	DDB_G0273141	cblA-1, products: RING zinc finger-containing protein, SH2 domain-containing protein, EF-hand-like domain-containing protein
20.958	-0.0568263	0.309055	0.172067	0.536475	DDB_G0273143	DDB_G0273143, products:
33.1109	-0.0452711	0.212343	0.508256	0.840276	DDB_G0273147	DDB_G0273147, products: unknown
606.376	0.275476	0.146944	0.00414355	0.050608	DDB_G0273149	DDB_G0273149, products: putative importin subunit alpha A
106.588	0.182232	0.228166	0.0654144	0.333649	DDB_G0273151	DDB_G0273151, products: TraB domain-containing protein
7.39648	0.0362601	0.248944	0.524312	NA	DDB_G0273155	DDB_G0273155, products: zinc-containing alcohol dehydrogenase (ADH)
119.313	0.0775905	0.16922	0.317787	0.716354	DDB_G0273157	iliE-1, products: concanavalin A-like lectin/glucanase superfamily protein
328.359	0.148583	0.25162	0.103361	0.424643	DDB_G0273163	psmB4-1, products: proteasome subunit beta type 4, 20S proteasome subunit beta-4
21.4537	0.0584765	0.206499	0.418002	0.790245	DDB_G0273165	DDB_G0273165, products: endonuclease V
12.8313	-0.167039	0.353947	0.0563166	0.301222	DDB_G0273169	DDB_G0273169, products:
490.275	-0.0190206	0.102319	0.769109	0.945561	DDB_G0273171	irlF-1, products: IRE family protein kinase IrlF
144.78	0.0188255	0.129973	0.786416	0.94918	DDB_G0273173	DDB_G0273173, products:
311.122	-1.59495	0.200584	7.40036e-17	1.51073e-14	DDB_G0273175	cf50-1, products: component of the counting factor (CF) complex
15.5718	0.0406771	0.218852	0.538701	0.856727	DDB_G0273177	DDB_G0273177, products:
92.1267	-0.522896	0.309267	0.00143056	0.0218638	DDB_G0273185	DDB_G0273185, products:
109.598	0.0214022	0.137747	0.760978	0.943007	DDB_G0273189	DDB_G0273189, products: transmembrane protein
664.264	0.0525477	0.172173	0.477901	0.823788	DDB_G0273191	rps30-1, products: 40S ribosomal protein S30
163.577	0.149093	0.170862	0.0904483	0.398434	DDB_G0273193	DDB_G0273193, products: PH domain-containing protein
48.178	0.17686	0.265056	0.0708873	0.34808	DDB_G0273197	alyD-1, products: lysozyme
444.538	0.693536	0.204282	9.38519e-06	0.000305964	DDB_G0273199	mkpB-1, products: dual-specificity protein phosphatase MkpB
31.7968	0.0115407	0.192029	0.864303	0.970346	DDB_G0273201	DDB_G0273201, products: DNA-binding HORMA domain-containing protein, mitotic spindle assembly checkpoint protein 2
204.812	-0.09353	0.144207	0.225882	0.613271	DDB_G0273203	snf12-1, products: SWI/SNF protein SNF12
640.75	-0.00763288	0.101272	0.905673	0.980339	DDB_G0273205	DDB_G0273205, products: calcium-binding EF-hand domain-containing protein
1481.32	-0.0037889	0.108888	0.954201	0.990024	DDB_G0273207	cdk9-1, products: CDK family protein kinase 9
1485.94	0.168343	0.134151	0.0402847	0.248928	DDB_G0273209	trappc10-1, products: trafficking protein particle complex subunit 10
31.1527	-0.0296188	0.191637	0.66886	0.914619	DDB_G0273211	aslD-1, products: putative acetyl-CoA synthetase
132.339	0.120511	0.186979	0.158374	0.516703	DDB_G0273221	DDB_G0273221, products: unknown
114.705	-0.054654	0.143685	0.455375	0.815067	DDB_G0273223	aslO-1, products: putative acetyl-CoA synthetase
42.2035	-0.0251393	0.173725	0.722468	0.934586	DDB_G0273225	aslC-1, products: putative acetyl-CoA synthetase
13.7863	-0.00207676	0.22279	0.972422	0.994743	DDB_G0273227	aslI-1, products: putative acetyl-CoA synthetase
152.298	-0.0255476	0.12418	0.711067	0.932237	DDB_G0273231	DDB_G0273231, products:
26.7926	-0.0491925	0.201017	0.488698	0.828641	DDB_G0273235	DDB_G0273235, products: P-type ATPase
138.349	0.0407012	0.133752	0.566591	0.869792	DDB_G0273237	DDB_G0273237, products: esterase/lipase/thioesterase domain-containing protein
6630	0.131571	0.0960958	0.0505674	0.281902	DDB_G0273247	DDB_G0273247, products:
44931.1	0.00319041	0.0813284	0.956767	0.9901	DDB_G0273249	hspE-1, products: heat shock protein, heat shock cognate protein Hsc70-2
3161.66	-0.0989412	0.0837732	0.106941	0.431174	DDB_G0273251	fpaB-1, products: ubiquitin ligase subunit SKP1
181.456	-0.122682	0.160598	0.139861	0.486125	DDB_G0273257	comF-1, products: unknown
150.217	0.089104	0.151307	0.251705	0.648003	DDB_G0273259	qkgA-1, products: LRRK family protein kinase QkgA
61.8217	-0.0301807	0.162049	0.674025	0.917753	DDB_G0273263	DDB_G0273263_RTE, products: TRE3-B ORF2
39.9918	0.0595289	0.18422	0.424928	0.796009	DDB_G0273265	DDB_G0273265, products:
30.6309	-0.15543	0.280949	0.0888083	0.39453	DDB_G0273269	DDB_G0273269_ps, products: pseudogene
20.521	-0.20967	0.376572	0.0370109	0.233332	DDB_G0273275	DDB_G0273275, products:
896.772	-0.798816	0.149742	9.95293e-10	8.88921e-08	DDB_G0273277	DDB_G0273277, products:
1010.92	-0.00461314	0.0846738	0.938676	0.986152	DDB_G0273285	DDB_G0273285, products:
56.9077	1.64215	0.407332	3.705e-07	1.66317e-05	DDB_G0273289	DDB_G0273289, products: unknown
165.619	1.41938	0.294224	1.58966e-08	1.01714e-06	DDB_G0273291	ddo-2, products: D-aspartate oxidase, D-amino-acid:oxygen oxidoreductase (deaminating)
48.1491	0.0800829	0.188814	0.30525	0.703458	DDB_G0273293	DDB_G0273293, products: unknown
189.38	-0.110667	0.180029	0.184457	0.554146	DDB_G0273295	DDB_G0273295, products: 39S ribosomal protein L20, mitochondrial
63.4268	0.128581	0.20836	0.142113	0.490924	DDB_G0273301	DDB_G0273301, products:
49.9403	0.177451	0.29009	0.0675256	0.337983	DDB_G0273311	DDB_G0273311, products: unknown
265.525	0.00328066	0.117767	0.96125	0.991788	DDB_G0273315	DDB_G0273315, products:
451.121	0.0849321	0.122399	0.240662	0.633732	DDB_G0273321	DDB_G0273321, products:
41.5627	-0.161132	0.264305	0.0862196	0.388668	DDB_G0273325	DDB_G0273325_RTE, products: TRE3-C ORF1
73.6644	-0.3085	0.27078	0.0137407	0.119727	DDB_G0273327	DDB_G0273327_RTE, products: TRE3-C ORF2
19.2916	0.0652981	0.220922	0.362538	0.752274	DDB_G0273329	DDB_G0273329_RTE, products: TRE3-C ORF2
9.0883	0.00491918	0.2261	0.93373	NA	DDB_G0273331	DDB_G0273331, products:
20.7673	0.020508	0.207081	0.753703	0.941607	DDB_G0273333	irlB-1, products: IRE family protein kinase IrlB
179.467	-0.0486226	0.12346	0.487616	0.828641	DDB_G0273339	DDB_G0273339, products:
19.4684	0.0267082	0.206999	0.686468	0.923952	DDB_G0273343	DDB_G0273343, products: tRNA-splicing endonuclease subunit Sen34
611.919	-0.16494	0.119416	0.0329156	0.216924	DDB_G0273345	DDB_G0273345_RTE, products: TRE5-A ORF2
615.352	-0.434773	0.136345	5.50294e-05	0.00141264	DDB_G0273347	DDB_G0273347_RTE, products: TRE5-A ORF1
41.7768	0.219731	0.306568	0.0413627	0.252141	DDB_G0273355	rexo2-1, products: RNA exonuclease 2
41.2847	-0.0218998	0.184461	0.752354	0.941156	DDB_G0273357	DDB_G0273357, products:
27.2441	-0.0498023	0.209616	0.475943	0.822572	DDB_G0273361	DDB_G0273361, products: HPP family protein
142.26	-0.00977238	0.125659	0.886925	0.975702	DDB_G0273377	DDB_G0273377, products:
1548.48	-0.0497462	0.0826085	0.405414	0.781322	DDB_G0273379	DDB_G0273379, products:
754.217	-0.00683782	0.0864241	0.910036	0.981351	DDB_G0273381	trim-1, products: tripartite motif-containing protein
385.842	-0.102796	0.130035	0.173142	0.537569	DDB_G0273383	cwc15-1, products: putative pre-mRNA-splicing factor CWC15
25.6063	-0.167888	0.281292	0.0768132	0.36609	DDB_G0273385	DDB_G0273385, products:
197.91	0.116387	0.165447	0.160449	0.518986	DDB_G0273387	DDB_G0273387, products: unknown
68.9817	-0.142605	0.22921	0.115114	0.445994	DDB_G0273391	DDB_G0273391, products:
63.5481	0.0848222	0.184015	0.283379	0.683458	DDB_G0273397	carA-1, products: cAMP receptor 1
891.865	0.0442778	0.106914	0.506107	0.839329	DDB_G0273399	mip1-1, products: MEK1 interacting protein 1
149.82	0.0721037	0.142985	0.335297	0.73151	DDB_G0273409	hspF-1, products: heat shock protein Hsp20 domain-containing protein, putative alpha-crystallin-type heat shock protein
355.939	-0.085589	0.139322	0.257885	0.653399	DDB_G0273411	DDB_G0273411, products: Elongation factor P-like protein
54.8895	0.110177	0.202477	0.18865	0.56122	DDB_G0273413	DDB_G0273413, products: pirin family protein
441.999	0.018236	0.113744	0.785698	0.948821	DDB_G0273415	DDB_G0273415, products:
23.8057	-0.0206077	0.205881	0.753518	0.941607	DDB_G0273417	DDB_G0273417, products: putative S-adenosyl-L-methionine methyltransferase
90.1388	-0.0438792	0.149399	0.546022	0.86122	DDB_G0273419	DDB_G0273419, products:
4209.37	0.0234249	0.0760348	0.681043	0.921859	DDB_G0273421	DDB_G0273421, products:
155.836	0.0408922	0.142373	0.569654	0.871041	DDB_G0273425	rpc25-1, products: RNA polymerase III subunit
19.0713	0.0237321	0.206493	0.718645	0.933869	DDB_G0273429	hpdl-1, products: 4-hydroxyphenylpyruvate dioxygenase-like protein
54.7923	0.104022	0.20562	0.207011	0.586645	DDB_G0273433	trafK-1, products: TNF receptor-associated factor K
16.0814	0.137369	0.332825	0.0807703	0.374587	DDB_G0273435	DDB_G0273435, products:
[truncated: 6,745 more rows]

## Sheet: GSEA_GO
ID	Description	setSize	enrichmentScore	NES	pvalue	p.adjust	qvalues	rank	leading_edge	core_enrichment	geneID_ddb
ddi04141	Protein processing in endoplasmic reticulum	84	0.703758	2.08855	0.000177936	0.000177936	0.00847466	1278	tags=45%, list=15%, signal=39%	Q54BE0/O44007/Q54GD3/Q54IC9/Q8T869/Q54EN4/Q55F45/Q54M21/Q54U61/Q54T59/Q54Z72/O60999/Q54BQ5/Q54E62/Q556U6/P90532/Q54XF7/Q54LV1/Q54IC1/Q54JQ6/Q86IA3/Q54F90/Q54FX4/Q54LP7/Q8T2J5/Q54VI6/Q54M91/Q55BK0/Q55BA8/Q54VQ1/Q55GT5/Q54Y14/Q23858/Q9XZJ3/Q54K33/Q54C27/Q55CT5/Q55FC8	DDB_G0273093, DDB_G0276141, DDB_G0277797, DDB_G0283539, DDB_G0288849, DDB_G0290227, DDB_G0291434, DDB_G0293224, DDB_G0273813, DDB_G0281985, DDB_G0291003, DDB_G0291780, DDB_G0280037, DDB_G0290547, DDB_G0293498, DDB_G0287629, DDB_G0287847, DDB_G0288833, DDB_G0293674, DDB_G0268642, DDB_G0271144, DDB_G0276445, DDB_G0281255, DDB_G0286357, DDB_G0292264, DDB_G0267384, DDB_G0267524, DDB_G0268168, DDB_G02…
ddi03050	Proteasome	38	0.830873	2.16934	0.000187231	0.000187231	0.00847466	1111	tags=92%, list=13%, signal=81%	P34124/Q55GJ6/Q553E0/P34119/Q54QR2/Q55BV5/Q54PN7/Q54BC8/Q86JA1/Q55G04/Q54BC6/Q54UB5/Q54JM5/Q54NQ0/Q27562/Q55DY7/Q54PJ1/Q86IJ1/Q86A21/Q55G18/Q27563/Q55C75/Q1ZXD3/Q54XM7/Q967U1/Q55D66/Q54DM7/P34123/Q54DB2/Q556Q0/Q54S82/Q54UJ0/Q556N5/P34120/Q54WI8	DDB_G0272969, DDB_G0282363, DDB_G0285099, DDB_G0269472, DDB_G0273909, DDB_G0282617, DDB_G0285105, DDB_G0267408, DDB_G0268538, DDB_G0274093, DDB_G0281051, DDB_G0289003, DDB_G0267390, DDB_G0269772, DDB_G0280969, DDB_G0284415, DDB_G0293752, DDB_G0267866, DDB_G0270188, DDB_G0270784, DDB_G0272624, DDB_G0284517, DDB_G0292398, DDB_G0276917, DDB_G0278847, DDB_G0292122, DDB_G0292382, DDB_G0272831, DDB_G02…
ddi04120	Ubiquitin mediated proteolysis	67	0.621677	1.7824	0.000361272	0.000361272	0.0109015	1162	tags=36%, list=13%, signal=31%	O44007/Q54GG5/Q54NZ5/P0CG81/P0CG80/P0CG78/Q555G0/P0CG88/P0CG77/O60999/Q54XF7/P0CG79/Q54JQ6/Q55C16/Q54FX4/Q9NGP4/P0CG76/Q54LP7/Q54I43/Q553F3/Q551N8/Q54J27/Q9XZJ3/Q54K33	DDB_G0269458, DDB_G0276481, DDB_G0289449, DDB_G0279721, DDB_G0290547, DDB_G0287629, DDB_G0287847, DDB_G0289021, DDB_G0274897, DDB_G0288345, DDB_G0291928, DDB_G0292264, DDB_G0267384, DDB_G0286511, DDB_G0275787, DDB_G0282295, DDB_G0282369, DDB_G0290179, DDB_G0270272, DDB_G0278991, DDB_G0284903, DDB_G0286907, DDB_G0287693, DDB_G0291972
ddi01230	Biosynthesis of amino acids	58	0.618785	1.73151	0.00163547	0.00163547	0.0370133	1160	tags=36%, list=13%, signal=32%	Q54XS1/Q55DT8/Q9GPM4/Q869R8/Q551C2/Q54RF5/Q86A67/Q94469/P0C7B6/Q54MJ7/Q556J0/Q55DP8/Q54NE6/Q54EW1/P90521/Q54WR9/Q86B06/Q75JR2/Q54Z26/Q54VU3/Q54RK5	DDB_G0276711, DDB_G0283247, DDB_G0285311, DDB_G0270562, DDB_G0274019, DDB_G0280135, DDB_G0287595, DDB_G0274471, DDB_G0277947, DDB_G0283137, DDB_G0272618, DDB_G0272787, DDB_G0274111, DDB_G0278781, DDB_G0279591, DDB_G0272210, DDB_G0274375, DDB_G0275153, DDB_G0269526, DDB_G0285899, DDB_G0291652, DDB_G0295755
ddi01200	Carbon metabolism	97	0.552235	1.67269	0.00230988	0.00230988	0.041821	1754	tags=42%, list=20%, signal=34%	Q54G53/Q6TU48/Q9GPM4/Q869R8/Q551C2/Q8TA03/Q54RF5/Q86A67/Q54VA2/Q94469/Q54LF1/Q54D04/Q5V9E9/Q8T2K9/Q54MJ7/Q556J0/Q54NE6/Q54EW1/P90521/Q54VM2/Q54TY9/Q54JZ3/Q86B06/Q75JR2/Q54RL8/Q54Z26/Q86AD9/P36967/Q54RK5/Q54Z60/Q54C70/Q9U3X4/Q869S7/Q54CJ3/Q8T131/Q54UP4/Q553S7/Q54E41/Q54RR4/Q54UH8/Q55CC2	DDB_G0272524, DDB_G0276711, DDB_G0277885, DDB_G0281523, DDB_G0283247, DDB_G0285311, DDB_G0283673, DDB_G0290397, DDB_G0280255, DDB_G0280495, DDB_G0292600, DDB_G0271544, DDB_G0274019, DDB_G0275355, DDB_G0280535, DDB_G0287595, DDB_G0270120, DDB_G0274471, DDB_G0276341, DDB_G0277947, DDB_G0283137, DDB_G0286669, DDB_G0272618, DDB_G0272787, DDB_G0274111, DDB_G0274449, DDB_G0275887, DDB_G0282969, DDB_G02…
ddi00500	Starch and sucrose metabolism	28	0.698478	1.7221	0.00778136	0.00778136	0.117403	976	tags=54%, list=11%, signal=48%	Q55FE6/Q23919/Q55BE3/Q54NU9/Q54PW3/Q54TS5/Q54K57/Q55BF6/Q00766/P22699/Q5V9E9/Q54YZ0/Q54TY9/Q54M04/Q9U720	DDB_G0281523, DDB_G0284975, DDB_G0283673, DDB_G0288483, DDB_G0286277, DDB_G0287657, DDB_G0271376, DDB_G0281547, DDB_G0284259, DDB_G0268446, DDB_G0277879, DDB_G0281383, DDB_G0269124, DDB_G0271134, DDB_G0271314
ddi00010	Glycolysis / Gluconeogenesis	30	0.669861	1.67325	0.0107669	0.0107669	0.139241	1211	tags=50%, list=14%, signal=43%	Q9GPM4/Q23919/Q869R8/Q54RF5/Q86A67/Q94469/Q5V9E9/Q54NE6/P90521/Q54FY2/Q54TY9/Q54FY1/Q54RK5/Q54Z60/Q54C70	DDB_G0281523, DDB_G0283247, DDB_G0285311, DDB_G0283673, DDB_G0288483, DDB_G0287595, DDB_G0290537, DDB_G0274471, DDB_G0283137, DDB_G0274111, DDB_G0290535, DDB_G0274375, DDB_G0275153, DDB_G0292994, DDB_G0277815
ddi00620	Pyruvate metabolism	30	0.658454	1.64476	0.0143559	0.0143559	0.162448	1211	tags=47%, list=14%, signal=40%	Q6TU48/Q54UF7/Q54RF5/Q54VA2/Q54D04/Q8T2K9/Q54FY2/Q54VM2/Q54JZ3/Q55BQ4/Q86AD9/Q54FY1/Q54Z60/Q54C70	DDB_G0272524, DDB_G0283247, DDB_G0280255, DDB_G0280495, DDB_G0292600, DDB_G0271544, DDB_G0290537, DDB_G0275887, DDB_G0287723, DDB_G0290535, DDB_G0292994, DDB_G0270806, DDB_G0277815, DDB_G0281101
ddi04136	Autophagy - other	23	0.675622	1.60334	0.0220952	0.0220952	0.197033	1625	tags=57%, list=19%, signal=46%	Q86CR8/Q54NA3/Q54J54/Q54NA2/Q54MY6/Q54G11/Q86CS2/Q86CR6/Q54S77/Q54QM7/Q557H7/Q54JI9/Q9XZE5	DDB_G0273553, DDB_G0286191, DDB_G0288021, DDB_G0290263, DDB_G0283753, DDB_G0282929, DDB_G0285767, DDB_G0273443, DDB_G0285323, DDB_G0282627, DDB_G0292390, DDB_G0285375, DDB_G0288287, DDB_G0290491
ddi00220	Arginine biosynthesis	12	0.772192	1.60947	0.0239336	0.0239336	0.197033	717	tags=42%, list=8%, signal=38%	Q55DT8/P0C7B6/Q54MJ7/Q55DP8/Q54WR9	DDB_G0270562, DDB_G0279591, DDB_G0269526, DDB_G0285899, DDB_G0295755
ddi00030	Pentose phosphate pathway	19	0.700807	1.60045	0.0239418	0.0239418	0.197033	704	tags=42%, list=8%, signal=39%	Q23919/Q551C2/Q8TA03/Q86A67/Q5V9E9/Q54UQ4/Q556J0/P90521	DDB_G0276711, DDB_G0277885, DDB_G0283673, DDB_G0288483, DDB_G0274019, DDB_G0280893, DDB_G0272618, DDB_G0274111, DDB_G0274375
ddi04144	Endocytosis	77	0.499029	1.46141	0.0304441	0.0304441	0.229666	2442	tags=48%, list=28%, signal=35%	Q54BE0/Q54DK9/Q54NT2/Q86K93/P54672/P20791/O96626/Q54JK4/Q54V47/Q54WR4/Q86KI1/Q54CK9/Q54GE3/Q54IF7/Q8T7K0/Q54TP9/O00909/Q54IR8/Q54DL4/Q54DB1/O96625/Q55B11/P25870/P20790/Q54I38/Q54FL9/Q54Q40/Q8SSP5/Q54LJ3/Q54GK9/Q54KI4/P36412/Q54C24/O96624/P36415/Q54PT2/Q54EH1	DDB_G0269144, DDB_G0273439, DDB_G0277133, DDB_G0277139, DDB_G0284997, DDB_G0287325, DDB_G0292804, DDB_G0277221, DDB_G0286797, DDB_G0292400, DDB_G0280621, DDB_G0289173, DDB_G0281627, DDB_G0284037, DDB_G0293674, DDB_G0269238, DDB_G0275451, DDB_G0290771, DDB_G0291512, DDB_G0269102, DDB_G0271488, DDB_G0276399, DDB_G0279483, DDB_G0280043, DDB_G0284347, DDB_G0287993, DDB_G0288319, DDB_G0288569, DDB_G02…
ddi00380	Tryptophan metabolism	21	0.659773	1.53547	0.0401837	0.0401837	0.269173	1348	tags=43%, list=15%, signal=36%	Q54RE8/Q55DB4/Q54S02/Q54LN9/Q54IT3/Q54FY2/Q86AD9/Q54FY1/Q54R47	DDB_G0288541, DDB_G0269714, DDB_G0283411, DDB_G0271544, DDB_G0290537, DDB_G0282743, DDB_G0283173, DDB_G0290535, DDB_G0286525
ddi00100	Steroid biosynthesis	15	-0.695024	-1.54671	0.0454354	0.0454354	0.269173	461	tags=40%, list=5%, signal=38%	Q55D54/Q55E32/Q54DR1/Q54I98/Q54PP1/Q54WK0	DDB_G0269788, DDB_G0279611, DDB_G0288907, DDB_G0269414, DDB_G0284407, DDB_G0292072
ddi00860	Porphyrin and chlorophyll metabolism	12	0.743658	1.55	0.0459371	0.0459371	0.269173	550	tags=33%, list=6%, signal=31%	Q54IA8/Q54IA7/Q54DT8/Q54KB8	DDB_G0292040, DDB_G0288891, DDB_G0288893, DDB_G0287467
ddi00970	Aminoacyl-tRNA biosynthesis	43	0.546745	1.46257	0.0490413	0.0490413	0.269173	2546	tags=56%, list=29%, signal=40%	Q558Z0/Q54N83/Q54X95/Q54KB8/Q54J66/Q75JQ1/Q54PF9/Q86A90/Q54Y20/Q551A1/Q55DZ8/Q55C99/Q8MP20/Q55GM6/Q54TY4/Q75JK9/Q55D12/Q86KU2/Q869Z3/P14325/Q54Q07/Q86AS6/Q54KS8/Q54KR1	DDB_G0276721, DDB_G0272236, DDB_G0284583, DDB_G0274567, DDB_G0287467, DDB_G0272867, DDB_G0277823, DDB_G0270152, DDB_G0274159, DDB_G0277733, DDB_G0284197, DDB_G0287141, DDB_G0267604, DDB_G0271906, DDB_G0274545, DDB_G0285451, DDB_G0269454, DDB_G0287159, DDB_G0289481, DDB_G0269822, DDB_G0276079, DDB_G0279113, DDB_G0281437, DDB_G0288267
