# Supplementary material for: A TRAF-like E3 ubiquitin ligase TrafE coordinates ESCRT and autophagy in endolysosomal damage response and cell-autonomous immunity to Mycobacterium marinum
Source: eLife. 2023 Apr 18;12:e85727. doi: 10.7554/eLife.85727 (PMC10181826; doi:10.7554/eLife.85727)
Supplement: Figure 9—source data 1. [file elife-85727-fig9-data1.xlsx]

## Sheet: 43523_HC_raw_data
Well.Name	Site.ID	Cell..GFP.dot_FITC_Features.Count_Sum..Lyudmil.	Cell..GFP.dot_FITC_Area_Sum..Lyudmil.	Cell..GFP.dot_FITC_Area_Average..Lyudmil.	Cell..GFP.dot_FITC_Integrated.Intensity_Average..Lyudmil.	Cell..GFP.dot_FITC_Integrated.Intensity_Sum..Lyudmil.	Cell..GFP.dot_FITC_Average.Intensity_Average..Lyudmil.
A01	1	1.81818	0.184568	0.100511	11205.7	20964.6	1390.91
A02	1	2.3	0.301346	0.106163	12111.6	36760.1	1382.26
A03	1	2.25	0.261759	0.11814	13949.9	29402.1	1414.01
A04	1	1.45454	0.124213	0.0861929	8532.82	12438.7	1240.11
A05	1	1.72727	0.175275	0.10302	9996.72	17286	1223.77
A06	1	1.90909	0.176447	0.0936426	9138.86	17638.9	1234.65
D01	1	2.42105	0.309818	0.121107	16107.6	41213.1	1591.42
D02	1	2.69565	0.381404	0.130664	17741.6	56097.4	1597.27
D03	1	3	0.470197	0.155268	20333.6	64271.6	1592.58
D04	1	3.72727	0.598401	0.155478	19743.8	78395.6	1534.75
D05	1	2.85714	0.360269	0.121448	14513.1	41796.1	1440.93
D06	1	3.77778	0.556156	0.140689	16603.5	66585.2	1428.58
A01	2	1.64286	0.199745	0.124505	16276	25488.6	1520.37
A02	2	2	0.251554	0.12195	15013.4	32022	1461.44
A03	2	1.6	0.167273	0.101645	11400.9	19423.4	1379.61
A04	2	2.25	0.207485	0.100274	10666.2	21148.8	1332.45
A05	2	2.09091	0.207787	0.0904476	9339.46	21842.5	1287.68
A06	2	1.41667	0.1362	0.0975376	9526.88	13313.3	1243.13
D01	2	2.4	0.397116	0.163104	23663.9	58389.7	1719.49
D02	2	2.95	0.423294	0.144153	20717.3	59507.4	1656.83
D03	2	2.43478	0.367526	0.156051	22110.5	51351.5	1676.94
D04	2	3.17647	0.452925	0.138269	17096.8	56062.6	1497.8
D05	2	2.27273	0.299493	0.130693	15451.6	35708.9	1414.78
D06	2	4.75	0.649623	0.139641	17292.1	81833.6	1502.34
A01	3	2.22222	0.296529	0.127462	15214.7	37176.4	1464.18
A02	3	2.3	0.249002	0.0985429	10141.5	26369.4	1275.32
A03	3	1.42857	0.127685	0.0875577	8898.93	13282.8	1283.9
A04	3	1.55556	0.140463	0.0877301	8153	13141.7	1172.17
A05	3	1.28571	0.118574	0.093041	9476.29	11735.1	1250.86
A06	3	2.22222	0.259636	0.12177	12523.5	26499	1274.64
D01	3	3.09524	0.473669	0.154799	20838.8	63767.6	1641.91
D02	3	3.13043	0.426928	0.143049	20312.9	59939.7	1648.54
D03	3	3.38095	0.557581	0.160859	24153.2	83657.6	1787.66
D04	3	4.93103	0.689086	0.138628	16651.2	83879.3	1456.7
D05	3	3.75	0.541883	0.144705	16796.3	65112.9	1406.58
D06	3	3.875	0.501183	0.125479	14411	59825.5	1374.04
A01	4	2.18182	0.289042	0.127978	16102.3	36947.5	1500.14
A02	4	1.83333	0.240481	0.124567	14748.5	27817.1	1432.61
A03	4	1.46154	0.171884	0.10919	11893.3	19309.6	1332.92
A04	4	1.8	0.178767	0.102076	10533.8	18679.9	1278.56
A05	4	1.66667	0.171308	0.101784	10100	17292	1246.63
A06	4	1.81818	0.174119	0.100698	9733.07	16890.9	1217.77
D01	4	2.82857	0.462601	0.15427	21500.1	67283.3	1647.1
D02	4	3.90476	0.570957	0.146836	20481.8	81743.8	1627.69
D03	4	2.45454	0.388876	0.154026	20218.7	52002.2	1593.19
D04	4	3.76667	0.546087	0.139663	16904.6	67154.3	1488.14
D05	4	3.81481	0.502249	0.133235	16197.4	59425.7	1466.81
D06	4	3.44444	0.497992	0.14681	17761.1	59716.2	1479.87
A01	5	1.46667	0.139611	0.0929334	9664.01	14302.9	1297.74
A02	5	1.72727	0.262341	0.15187	18912.1	33427.8	1489.18
A03	5	1.26667	0.143858	0.117047	54178.9	56986.6	3951.29
A04	5	1.375	0.12929	0.0941779	9529	12940.5	1241.61
A05	5	2.11111	0.20855	0.101199	10203.5	20652	1266.57
A06	5	1.30769	0.13063	0.103455	10260.4	12792.3	1244.44
D01	5	3	0.499523	0.163543	22279.8	71406	1661.16
D02	5	2.57895	0.376348	0.144156	21886	58948.8	1740.52
D03	5	2.77778	0.428472	0.158337	23026.1	62362.4	1738.37
D04	5	3.45454	0.508438	0.150566	18594.4	63515.9	1541.56
D05	5	3.33333	0.496571	0.145233	18054.7	62408.3	1512.69
D06	5	3.8	0.550982	0.145608	18002.2	67959.3	1486.53
A01	6	1.95	0.235586	0.121354	13181.5	25496.2	1354.53
A02	6	1.76	0.214011	0.1205	13580.1	24064.2	1400.09
A03	6	1.76191	0.220721	0.117524	13668.7	26090.1	1426.59
A04	6	1.8125	0.194722	0.106805	11268.1	20686.7	1307.14
A05	6	1.7	0.162163	0.0965649	9653.3	16513.4	1249.07
A06	6	1.77778	0.192243	0.103027	10327.7	19630.6	1252.4
D01	6	3	0.454896	0.149637	21171	66060.4	1679.64
D02	6	3.2	0.480113	0.151998	20318	65730	1616.25
D03	6	3.84	0.631811	0.155574	21619.2	89358.9	1669.84
D04	6	4.10526	0.559149	0.13954	16960.7	68041.6	1475.3
D05	6	3.40909	0.472451	0.133357	15594.8	55628.4	1426.53
D06	6	3.65517	0.501952	0.133062	15641.8	60665	1415.37
A01	7	2.25	0.276656	0.109334	11902.5	32115.4	1331.79
A02	7	1.33333	0.124496	0.0915067	9409.67	12804	1283.68
A03	7	2.21429	0.32926	0.144687	20976.6	43228.9	1589.55
A04	7	1.66667	0.157492	0.0893865	8626.89	15428.3	1225
A05	7	1.5	0.13833	0.0863716	8597.61	13925	1251.48
A06	7	1.5	0.147761	0.0998815	10135.8	14999.1	1267.45
D01	7	3.14286	0.486133	0.155963	22187.6	70268.9	1676.15
D02	7	2.65385	0.378649	0.137254	18584.1	53236.6	1575.6
D03	7	2.95454	0.412672	0.124952	15936.8	56622.6	1505.38
D04	7	3.19355	0.453095	0.138196	17551	57831.9	1523.62
D05	7	2.95238	0.439615	0.139169	16760.5	54301.2	1445.73
D06	7	3.07407	0.46536	0.145488	17509.9	57262.6	1468.81
A01	8	1.57143	0.21799	0.133927	16485.9	27852.5	1500.2
A02	8	2.375	0.397436	0.137055	17936.9	57915.4	1520.85
A03	8	2	0.213667	0.103429	11496.4	23304	1379.37
A04	8	2.28571	0.254462	0.109215	11521.6	26482.3	1319.17
A05	8	1.70588	0.19153	0.108222	11798.6	21003.9	1333.52
A06	8	1.1	0.0932105	0.0868215	8442.4	9021.1	1226.99
D01	8	2.85714	0.443876	0.154049	21995.7	66691.1	1670.23
D02	8	2.75	0.372125	0.133264	17175.1	49190.4	1564.63
D03	8	2.75	0.390094	0.136358	18534.7	52355.2	1610.78
D04	8	3.21053	0.434145	0.133034	15923.9	51703.5	1463.68
D05	8	2.81818	0.391196	0.138623	15700.8	44738.2	1395.74
D06	8	3.15625	0.446915	0.137958	16930.6	54303.4	1487.63
A01	9	1.66667	0.269212	0.139394	17831.4	35200.2	1470.7
A02	9	2.66667	0.327734	0.120668	15076.4	41697.8	1457.68
A03	9	1.6875	0.18116	0.115723	13774.1	21489.8	1399.8
A04	9	1.5	0.153232	0.117064	12909.1	16323.8	1387.79
A05	9	2.57143	0.28639	0.0956169	9916.34	31167.4	1257.22
A06	9	1.44444	0.16033	0.10216	9990.5	16116.1	1238.05
D01	9	3	0.408116	0.138293	18165.6	56070.7	1546.61
D02	9	4.0625	0.705487	0.178546	26902.8	111035	1737.48
D03	9	2.66667	0.424691	0.143682	19825.1	62066.4	1638.29
D04	9	2.75	0.367109	0.134425	17181.6	47339.6	1544.22
D05	9	4.27778	0.619297	0.141205	17472.1	79412.7	1514.97
D06	9	3.57692	0.512234	0.130202	15744.5	64203.9	1472.3
A01	10	1.8	0.289856	0.163443	21295.2	37437.4	1577.07
A02	10	1.53333	0.164288	0.0964963	10462.5	18307.5	1345.64
A03	10	1.8	0.205578	0.114919	13663.7	24431	1433.94
A04	10	1.25	0.114931	0.0893932	8666	11208	1223.67
A05	10	1.61111	0.151101	0.0931733	9325.97	15111.9	1261.59
A06	10	1.28571	0.122221	0.0930287	8826.86	11669.7	1193.55
D01	10	2.57692	0.378158	0.148531	20544.1	53419.5	1653.05
D02	10	3.02857	0.452022	0.137953	19651.1	66484.8	1701.53
D03	10	2.61905	0.373948	0.133407	18643.4	53784.3	1640.4
D04	10	5.28571	0.843663	0.15105	19666.4	110846	1570.57
D05	10	3.65	0.525444	0.153566	19045.7	63922.9	1485.32
D06	10	4.65625	0.650022	0.139216	16966.1	79793.2	1495.9
A01	11	2	0.281982	0.12592	16841.4	38255.5	1550.45
A02	11	1.6	0.194091	0.105559	11908.9	22863.4	1378.43
A03	11	1.72222	0.211403	0.109263	12276.9	24586.5	1364.92
A04	11	1.8	0.140464	0.0834318	8287.47	13634	1236.18
A05	11	1.52381	0.15566	0.0992934	10062.8	16157.1	1272.04
A06	11	1.5625	0.152429	0.0987602	9727.91	15042.3	1225.38
D01	11	2.66667	0.422655	0.164772	24372.5	61338.2	1745.71
D02	11	3.33333	0.45117	0.135836	18596.4	62885.9	1596.56
D03	11	3.11111	0.452117	0.144546	19523.4	61187.1	1595.04
D04	11	4	0.558506	0.142158	17302.7	68140.9	1503.23
D05	11	5.33333	0.793097	0.149355	19129.4	100043	1562.53
D06	11	2.57895	0.359545	0.136053	17242.1	45454	1519.15
A01	12	1.76191	0.234702	0.121585	13653.6	27353.8	1360.33
A02	12	1.57143	0.200659	0.116748	13123.1	23680.7	1382.28
A03	12	1.23077	0.151266	0.124251	14600.7	18045.9	1467.6
A04	12	2.23077	0.201357	0.0919502	9552.05	20678.9	1283.81
A05	12	1.53846	0.164027	0.10706	10147.5	15532.3	1192.97
A06	12	1.5	0.130884	0.0861906	8163.44	12182.2	1209.47
D01	12	3.3	0.466068	0.143899	19103.9	62837.2	1625.09
D02	12	2.33333	0.309551	0.129787	16967.1	42396.9	1576.28
D03	12	2.90909	0.4237	0.14841	20112	58114.5	1625.64
D04	12	4.11111	0.602508	0.140991	17741.9	77583.1	1516.72
D05	12	2.77778	0.361782	0.116806	12864	41064.7	1369.03
D06	12	3.25	0.454577	0.132221	15486.1	55240.5	1434.43
A01	13	1.625	0.217065	0.118504	14688.4	29223.9	1430.19
A02	13	1.36364	0.130004	0.0922816	10326.4	14490.7	1387.8
A03	13	3.5	0.450748	0.116682	14718.5	64684	1499.23
A04	13	1.14286	0.0966736	0.0820804	8001.86	9332.43	1234.55
A05	13	1.5	0.142062	0.0901837	8443.42	13270.8	1177.18
A06	13	1.84615	0.193494	0.0952744	9445.02	20157.1	1231.13
D01	13	3.48387	0.548244	0.151596	21043.2	80001.1	1647.08
D02	13	2.22222	0.266728	0.119884	15506.7	35705.4	1560.58
D03	13	2.81818	0.416735	0.146297	20056.6	57454.7	1641.24
D04	13	3.52381	0.504073	0.138582	16166	59537.4	1422.14
D05	13	4.375	0.624617	0.133561	16785.5	81085.3	1522.21
D06	13	5	0.692081	0.136299	15996.5	81929.3	1442.81
A01	14	1.33333	0.144711	0.105696	11889.3	16457.3	1398.02
A02	14	1.71429	0.176938	0.104884	11183.5	19331.6	1329.36
A03	14	2.33333	0.361788	0.157604	20333.8	47585.6	1546.13
A04	14	1.38461	0.114915	0.0818452	8139.35	11545.5	1249.37
A05	14	1.6	0.145564	0.0888129	8987.06	14813.3	1253.61
A06	14	2	0.200045	0.0946959	9829.04	21491.1	1294.06
D01	14	3.23333	0.506931	0.158408	22807	75597.4	1697.06
D02	14	2.52632	0.322582	0.115083	14648.9	43482	1502.07
D03	14	3.03226	0.437029	0.138047	18335.2	60947.7	1575.76
D04	14	4.45833	0.653879	0.141126	17422.1	84486.5	1499.01
D05	14	3.77778	0.513594	0.126242	14647	63879.6	1419.77
D06	14	3.04348	0.438028	0.145081	17261.8	52708.6	1457.44
A01	15	1.5	0.222662	0.142789	17254.6	27412.8	1500.34
A02	15	2.58333	0.364982	0.123776	14647.9	47724.4	1432.4
A03	15	1.83333	0.243669	0.123889	14448.6	28838	1432.97
A04	15	1.54546	0.134657	0.0845506	8607.86	13343.2	1295.81
A05	15	1.5	0.134078	0.0840633	8385	13739.3	1226.61
A06	15	1.55556	0.147549	0.0889072	8729.52	14719.3	1216.4
D01	15	3.125	0.4932	0.146171	19661.7	67747.5	1608.94
D02	15	2.4	0.39839	0.1672	24860.8	58599	1774.89
D03	15	2.69231	0.411557	0.142746	19386.2	56972.3	1594.43
D04	15	3.5	0.458523	0.126352	14884.7	55570	1432.7
D05	15	3.26667	0.468196	0.141522	16943.2	56807	1472.64
D06	15	3.5	0.489481	0.138147	16676.3	57170.7	1462.53
A01	16	1.5	0.156415	0.106761	11005.8	16187.2	1289.09
A02	16	2.26667	0.293684	0.119634	13326.4	33811.8	1381.77
A03	16	1.5	0.220262	0.136838	15850.6	26424.2	1409.4
A04	16	1.09091	0.0882042	0.081238	7841.95	8543.27	1232.93
A05	16	1.6	0.167271	0.107683	11187.7	17212.1	1293.33
A06	16	1.61539	0.141445	0.082923	8436.05	14166.7	1264.48
D01	16	2.64865	0.406193	0.155282	21280.9	57554.4	1628.21
D02	16	2.76	0.44487	0.153185	21315	65363.2	1667.19
D03	16	3.44444	0.525419	0.151095	21908.2	76988.3	1685.09
D04	16	4	0.564116	0.13602	16048.8	66077.2	1440.78
D05	16	2.88235	0.441657	0.14967	18761.9	56217.6	1541.5
D06	16	2.55	0.346677	0.13331	15834.7	41285.7	1429.16

## Sheet: dots_average_per_cell
Well.Name	Site.ID	Cell..GFP.dot_FITC_Features.Count_Sum..Lyudmil.	Strain	Condition
A01	1	1.33333	wt	control
A01	2	1.04545	wt	control
A01	3	0.909091	wt	control
A01	4	1.26316	wt	control
A01	5	0.814815	wt	control
A01	6	1.08333	wt	control
A01	7	1.58824	wt	control
A01	8	0.88	wt	control
A01	9	1	wt	control
A01	10	1.05882	wt	control
A01	11	0.8	wt	control
A01	12	1.12121	wt	control
A01	13	0.722222	wt	control
A01	14	0.631579	wt	control
A01	15	0.827586	wt	control
A01	16	0.818182	wt	control
A02	1	1.09524	wt	control
A02	2	1.05263	wt	control
A02	3	1.15	wt	control
A02	4	0.916667	wt	control
A02	5	1.11765	wt	control
A02	6	1	wt	control
A02	7	0.761905	wt	control
A02	8	1.26667	wt	control
A02	9	1.52381	wt	control
A02	10	0.851852	wt	control
A02	11	0.444444	wt	control
A02	12	0.611111	wt	control
A02	13	1	wt	control
A02	14	0.8	wt	control
A02	15	1.34783	wt	control
A02	16	1	wt	control
A03	1	0.9	wt	control
A03	2	0.695652	wt	control
A03	3	0.714286	wt	control
A03	4	0.703704	wt	control
A03	5	0.655172	wt	control
A03	6	0.902439	wt	control
A03	7	0.939394	wt	control
A03	8	1.15385	wt	control
A03	9	0.931034	wt	control
A03	10	0.765957	wt	control
A03	11	0.837838	wt	control
A03	12	0.761905	wt	control
A03	13	2.05882	wt	control
A03	14	0.933333	wt	control
A03	15	1.15789	wt	control
A03	16	0.9	wt	control
A04	1	1	trafE KO	control
A04	2	0.642857	trafE KO	control
A04	3	0.875	trafE KO	control
A04	4	0.964286	trafE KO	control
A04	5	0.44	trafE KO	control
A04	6	0.90625	trafE KO	control
A04	7	0.769231	trafE KO	control
A04	8	1.33333	trafE KO	control
A04	9	0.545455	trafE KO	control
A04	10	0.416667	trafE KO	control
A04	11	0.473684	trafE KO	control
A04	12	1.38095	trafE KO	control
A04	13	0.8	trafE KO	control
A04	14	0.692308	trafE KO	control
A04	15	0.944444	trafE KO	control
A04	16	0.75	trafE KO	control
A05	1	0.558824	trafE KO	control
A05	2	1.15	trafE KO	control
A05	3	0.6	trafE KO	control
A05	4	0.769231	trafE KO	control
A05	5	1	trafE KO	control
A05	6	0.809524	trafE KO	control
A05	7	0.9	trafE KO	control
A05	8	1.03571	trafE KO	control
A05	9	0.75	trafE KO	control
A05	10	0.878788	trafE KO	control
A05	11	0.842105	trafE KO	control
A05	12	0.833333	trafE KO	control
A05	13	0.48	trafE KO	control
A05	14	0.8	trafE KO	control
A05	15	0.545455	trafE KO	control
A05	16	0.727273	trafE KO	control
A06	1	1.05	trafE KO	control
A06	2	0.62963	trafE KO	control
A06	3	0.869565	trafE KO	control
A06	4	1	trafE KO	control
A06	5	0.653846	trafE KO	control
A06	6	0.820513	trafE KO	control
A06	7	0.913043	trafE KO	control
A06	8	0.314286	trafE KO	control
A06	9	0.866667	trafE KO	control
A06	10	0.692308	trafE KO	control
A06	11	1	trafE KO	control
A06	12	0.545455	trafE KO	control
A06	13	0.923077	trafE KO	control
A06	14	0.882353	trafE KO	control
A06	15	0.636364	trafE KO	control
A06	16	0.875	trafE KO	control
D01	1	1.7037	wt	starvation
D01	2	2.11765	wt	starvation
D01	3	2.32143	wt	starvation
D01	4	2.35714	wt	starvation
D01	5	2.58621	wt	starvation
D01	6	2.28571	wt	starvation
D01	7	2.75	wt	starvation
D01	8	2.72727	wt	starvation
D01	9	2.51613	wt	starvation
D01	10	2.16129	wt	starvation
D01	11	2.10526	wt	starvation
D01	12	2.64	wt	starvation
D01	13	3	wt	starvation
D01	14	2.77143	wt	starvation
D01	15	2.58621	wt	starvation
D01	16	2.33333	wt	starvation
D02	1	2.38462	wt	starvation
D02	2	2.80952	wt	starvation
D02	3	2.66667	wt	starvation
D02	4	3.03704	wt	starvation
D02	5	2.04167	wt	starvation
D02	6	2.74286	wt	starvation
D02	7	2.15625	wt	starvation
D02	8	2.26471	wt	starvation
D02	9	3.61111	wt	starvation
D02	10	2.71795	wt	starvation
D02	11	3.04348	wt	starvation
D02	12	2.33333	wt	starvation
D02	13	2	wt	starvation
D02	14	2.28571	wt	starvation
D02	15	1.71429	wt	starvation
D02	16	2.46429	wt	starvation
D03	1	2.42857	wt	starvation
D03	2	1.86667	wt	starvation
D03	3	2.84	wt	starvation
D03	4	2.16	wt	starvation
D03	5	2.63158	wt	starvation
D03	6	3.42857	wt	starvation
D03	7	2.09677	wt	starvation
D03	8	2.2	wt	starvation
D03	9	2.57143	wt	starvation
D03	10	1.96429	wt	starvation
D03	11	2.70968	wt	starvation
D03	12	2.2069	wt	starvation
D03	13	2.65714	wt	starvation
D03	14	2.61111	wt	starvation
D03	15	2.33333	wt	starvation
D03	16	2.65714	wt	starvation
D04	1	3.56522	trafE KO	starvation
D04	2	2.7	trafE KO	starvation
D04	3	4.20588	trafE KO	starvation
D04	4	3.42424	trafE KO	starvation
D04	5	3.30435	trafE KO	starvation
D04	6	4.10526	trafE KO	starvation
D04	7	3	trafE KO	starvation
D04	8	2.65217	trafE KO	starvation
D04	9	2.31579	trafE KO	starvation
D04	10	4.35294	trafE KO	starvation
D04	11	3.83333	trafE KO	starvation
D04	12	3.7	trafE KO	starvation
D04	13	3.36364	trafE KO	starvation
D04	14	3.96296	trafE KO	starvation
D04	15	3.20833	trafE KO	starvation
D04	16	3.86207	trafE KO	starvation
D05	1	2.85714	trafE KO	starvation
D05	2	2.08333	trafE KO	starvation
D05	3	3.52941	trafE KO	starvation
D05	4	3.55172	trafE KO	starvation
D05	5	2.72727	trafE KO	starvation
D05	6	3.40909	trafE KO	starvation
D05	7	2.69565	trafE KO	starvation
D05	8	2.58333	trafE KO	starvation
D05	9	4.05263	trafE KO	starvation
D05	10	3.47619	trafE KO	starvation
D05	11	5.33333	trafE KO	starvation
D05	12	2.08333	trafE KO	starvation
D05	13	4.375	trafE KO	starvation
D05	14	3.57895	trafE KO	starvation
D05	15	2.88235	trafE KO	starvation
D05	16	2.57895	trafE KO	starvation
D06	1	3.77778	trafE KO	starvation
D06	2	4.75	trafE KO	starvation
D06	3	3.1	trafE KO	starvation
D06	4	3.32143	trafE KO	starvation
D06	5	3.61905	trafE KO	starvation
D06	6	3.65517	trafE KO	starvation
D06	7	2.96429	trafE KO	starvation
D06	8	2.97059	trafE KO	starvation
D06	9	3.44444	trafE KO	starvation
D06	10	4.13889	trafE KO	starvation
D06	11	2.22727	trafE KO	starvation
D06	12	2.5	trafE KO	starvation
D06	13	4.7619	trafE KO	starvation
D06	14	3.04348	trafE KO	starvation
D06	15	3.31579	trafE KO	starvation
D06	16	2.125	trafE KO	starvation
