# Supplementary material for: A TRAF-like E3 ubiquitin ligase TrafE coordinates ESCRT and autophagy in endolysosomal damage response and cell-autonomous immunity to Mycobacterium marinum
Source: eLife. 2023 Apr 18;12:e85727. doi: 10.7554/eLife.85727 (PMC10181826; doi:10.7554/eLife.85727)
Supplement: Figure 9—source data 2. [file elife-85727-fig9-data2.xlsx]

## Sheet: T0_HC_per_image_data
Cell ID	Plate ID	Time Point	Well Name	MEASUREMENT SET ID	Cell: Dicty_FITC_Features Count_Sum (Lyudmil)	Cell: ATG8_positive_Dicty_Area_Sum (Lyudmil)	Cell: Dicty_FITC_Area_Sum (Lyudmil)	Cell: ATG8 dots_Area_Sum (Lyudmil)	Cell: ATG8 dots_Features Count_Sum (Lyudmil)	Strain	average nb of structures
54694_2456939_6521353_1	54694	0	B1	16907	35	992.509	3541.81	6.89526	16	wt	0.457143
54694_2456940_6521354_1	54694	0	B1	16907	48	2223.24	5100.25	15.9102	41	wt	0.854167
54694_2456941_6521355_1	54694	0	C1	16907	39	163.239	2556.86	0.983213	3	trafE KO	0.0769231
54694_2456942_6521356_1	54694	0	C1	16907	44	411.264	2814.9	1.05983	5	trafE KO	0.113636
54694_2456943_6521357_1	54694	0	D1	16907	39	967.788	4113.25	2.73257	12	wt	0.307692
54694_2456944_6521358_1	54694	0	D1	16907	70	2033.64	7047.88	7.13787	25	wt	0.357143
54694_2456945_6521359_1	54694	0	E1	16907	26	125.647	1778.47	0.804447	3	trafE KO	0.115385
54694_2456946_6521360_1	54694	0	E1	16907	39	164.873	2496.59	0.651219	3	trafE KO	0.0769231
54694_2456947_6521361_1	54694	0	F1	16907	23	600.449	2432.85	2.52826	7	wt	0.304348
54694_2456948_6521362_1	54694	0	F1	16907	62	2392.2	6491.76	15.3611	40	wt	0.645161
54694_2456949_6521363_1	54694	0	G1	16907	19	87.0335	1446.88	0.153228	1	trafE KO	0.0526316
54694_2456950_6521364_1	54694	0	G1	16907	35	375.306	2268.39	0.995982	5	trafE KO	0.142857

## Sheet: Time_course_per_image_HC_data
Cell ID	Plate ID	Time Point	Well Name	MEASUREMENT SET ID	Cell: Dicty_FITC_Features Count_Sum (Lyudmil)	Cell: ATG8_positive_Dicty_Area_Sum (Lyudmil)	Cell: Dicty_FITC_Area_Sum (Lyudmil)	Cell: ATG8 dots_Area_Sum (Lyudmil)	Cell: ATG8 dots_Features Count_Sum (Lyudmil)	Strain	average nb of structures
54695_2456951_6521365_1	54695	1	B01	16909	35	1301.01	3238.42	4.80114	15	wt	0.428571
54695_2456951_6521377_1	54695	2	B01	16909	34	1725.55	3594.93	8.64461	28	wt	0.823529
54695_2456951_6521389_1	54695	3	B01	16909	36	2417.12	3678.08	15.6165	48	wt	1.33333
54695_2456951_6521401_1	54695	4	B01	16909	34	2229.98	3504.02	13.9437	42	wt	1.23529
54695_2456951_6521413_1	54695	5	B01	16909	34	2425.91	3607.4	13.765	40	wt	1.17647
54695_2456951_6521425_1	54695	6	B01	16909	38	2152.14	3753.06	16.6891	51	wt	1.34211
54695_2456951_6521437_1	54695	7	B01	16909	40	2327.23	3795.15	19.7281	54	wt	1.35
54695_2456951_6521449_1	54695	8	B01	16909	40	3131.37	3835.81	24.4526	74	wt	1.85
54695_2456951_6521461_1	54695	9	B01	16909	42	2517.64	3561.22	20.5453	59	wt	1.40476
54695_2456951_6521473_1	54695	10	B01	16909	47	3390.63	3935.92	31.3607	88	wt	1.87234
54695_2456951_6521485_1	54695	11	B01	16909	43	3083.15	3678.9	30.8754	81	wt	1.88372
54695_2456951_6521497_1	54695	12	B01	16909	45	3109.92	3783.71	29.0367	80	wt	1.77778
54695_2456951_6521509_1	54695	13	B01	16909	46	3239.24	3841.94	26.6234	67	wt	1.45652
54695_2456952_6521366_1	54695	1	B01	16909	48	1023.36	4392.94	4.48192	15	wt	0.3125
54695_2456952_6521378_1	54695	2	B01	16909	45	1946.4	4438.1	10.8153	41	wt	0.911111
54695_2456952_6521390_1	54695	3	B01	16909	44	3185.92	4747	20.4815	72	wt	1.63636
54695_2456952_6521402_1	54695	4	B01	16909	48	3969.83	5170.73	22.5884	73	wt	1.52083
54695_2456952_6521414_1	54695	5	B01	16909	49	2922.16	4930.26	21.8478	68	wt	1.38776
54695_2456952_6521426_1	54695	6	B01	16909	45	3748.16	4995.44	28.2833	92	wt	2.04444
54695_2456952_6521438_1	54695	7	B01	16909	50	3687.07	5083.08	28.079	91	wt	1.82
54695_2456952_6521450_1	54695	8	B01	16909	47	3995.37	4741.49	39.1881	115	wt	2.44681
54695_2456952_6521462_1	54695	9	B01	16909	47	3969.01	4699.81	34.5018	107	wt	2.2766
54695_2456952_6521474_1	54695	10	B01	16909	50	3655.2	4588.26	48.3434	136	wt	2.72
54695_2456952_6521486_1	54695	11	B01	16909	42	3227.8	4056.05	41.5759	115	wt	2.7381
54695_2456952_6521498_1	54695	12	B01	16909	47	3257.42	4100.38	41.18	111	wt	2.3617
54695_2456952_6521510_1	54695	13	B01	16909	50	3155.48	4308.57	35.7915	93	wt	1.86
54695_2456953_6521367_1	54695	1	C01	16909	31	130.959	1886.34	0.689526	2	trafE KO	0.0645161
54695_2456953_6521379_1	54695	2	C01	16909	27	684.827	2066.33	2.84749	12	trafE KO	0.444444
54695_2456953_6521391_1	54695	3	C01	16909	29	209.616	2106.99	1.45567	5	trafE KO	0.172414
54695_2456953_6521403_1	54695	4	C01	16909	32	587.17	2209.34	1.18752	7	trafE KO	0.21875
54695_2456953_6521415_1	54695	5	C01	16909	31	173.045	2163.17	0.344763	2	trafE KO	0.0645161
54695_2456953_6521427_1	54695	6	C01	16909	30	402.275	1979.71	1.14921	5	trafE KO	0.166667
54695_2456953_6521439_1	54695	7	C01	16909	31	209.412	2255.31	0.906599	4	trafE KO	0.129032
54695_2456953_6521451_1	54695	8	C01	16909	32	236.584	2317.42	0.932137	5	trafE KO	0.15625
54695_2456953_6521463_1	54695	9	C01	16909	31	191.841	2209.96	0.408608	2	trafE KO	0.0645161
54695_2456953_6521475_1	54695	10	C01	16909	32	454.985	2368.9	1.36628	6	trafE KO	0.1875
54695_2456953_6521487_1	54695	11	C01	16909	29		2329.27	0.191535	1	trafE KO	0.0344828
54695_2456953_6521499_1	54695	12	C01	16909	31	295.424	1916.58	0.676757	4	trafE KO	0.129032
54695_2456953_6521511_1	54695	13	C01	16909	30	435.372	1959.68	1.17475	6	trafE KO	0.2
54695_2456954_6521368_1	54695	1	C01	16909	42	80.2915	2391.38	0.114921	1	trafE KO	0.0238095
54695_2456954_6521380_1	54695	2	C01	16909	42	391.242	2566.47	2.09412	8	trafE KO	0.190476
54695_2456954_6521392_1	54695	3	C01	16909	40	628.439	2661.06	2.00473	8	trafE KO	0.2
54695_2456954_6521404_1	54695	4	C01	16909	39	776.764	2631.03	2.66872	10	trafE KO	0.25641
54695_2456954_6521416_1	54695	5	C01	16909	41	513.416	2664.74	1.73658	8	trafE KO	0.195122
54695_2456954_6521428_1	54695	6	C01	16909	40	859.711	2750.34	2.22181	12	trafE KO	0.3
54695_2456954_6521440_1	54695	7	C01	16909	43	418.21	2783.23	1.60889	6	trafE KO	0.139535
54695_2456954_6521452_1	54695	8	C01	16909	43	273.154	2690.48	0.778909	5	trafE KO	0.116279
54695_2456954_6521464_1	54695	9	C01	16909	41	357.941	2621.42	2.08135	8	trafE KO	0.195122
54695_2456954_6521476_1	54695	10	C01	16909	39	761.032	2753.81	2.45165	11	trafE KO	0.282051
54695_2456954_6521488_1	54695	11	C01	16909	40	300.327	2514.78	1.65997	7	trafE KO	0.175
54695_2456954_6521500_1	54695	12	C01	16909	35	132.185	1873.67	0.881061	4	trafE KO	0.114286
54695_2456954_6521512_1	54695	13	C01	16909	32	310.746	1895.94	1.57059	6	trafE KO	0.1875
54695_2456955_6521369_1	54695	1	D01	16909	38	655.612	3756.54	1.83874	6	wt	0.157895
54695_2456955_6521381_1	54695	2	D01	16909	39	2770.57	4000.07	10.9813	45	wt	1.15385
54695_2456955_6521393_1	54695	3	D01	16909	37	3086.83	4212.75	19.3578	72	wt	1.94595
54695_2456955_6521405_1	54695	4	D01	16909	36	3631.91	4289.77	20.1495	77	wt	2.13889
54695_2456955_6521417_1	54695	5	D01	16909	40	3171	4331.65	18.4512	64	wt	1.6
54695_2456955_6521429_1	54695	6	D01	16909	37	3456.62	4372.92	18.4129	62	wt	1.67568
54695_2456955_6521441_1	54695	7	D01	16909	43	3028.4	4339.83	20.0346	65	wt	1.51163
54695_2456955_6521453_1	54695	8	D01	16909	43	3336.49	4145.12	25.2315	77	wt	1.7907
54695_2456955_6521465_1	54695	9	D01	16909	46	3629.46	4327.57	30.8499	86	wt	1.86957
54695_2456955_6521477_1	54695	10	D01	16909	41	3389.61	4113.05	36.315	96	wt	2.34146
54695_2456955_6521489_1	54695	11	D01	16909	44	3074.57	3950.01	30.4285	81	wt	1.84091
54695_2456955_6521501_1	54695	12	D01	16909	43	3046.38	3809.25	32.9951	87	wt	2.02326
54695_2456955_6521513_1	54695	13	D01	16909	46	3041.88	3883.21	28.6153	74	wt	1.6087
54695_2456956_6521370_1	54695	1	D01	16909	66	2176.25	6331.99	5.58005	24	wt	0.363636
54695_2456956_6521382_1	54695	2	D01	16909	63	3914.67	6953.28	16.9445	63	wt	1
54695_2456956_6521394_1	54695	3	D01	16909	64	4905.34	6467.45	30.9265	112	wt	1.75
54695_2456956_6521406_1	54695	4	D01	16909	62	4188.44	6337.1	23.4567	89	wt	1.43548
54695_2456956_6521418_1	54695	5	D01	16909	61	3750.82	6674	29.4325	98	wt	1.60656
54695_2456956_6521430_1	54695	6	D01	16909	71	5455.53	7080.77	38.7284	129	wt	1.8169
54695_2456956_6521442_1	54695	7	D01	16909	66	5294.33	6632.32	44.7809	146	wt	2.21212
54695_2456956_6521454_1	54695	8	D01	16909	62	5232.84	6761.65	45.6747	142	wt	2.29032
54695_2456956_6521466_1	54695	9	D01	16909	67	5585.06	6783.1	46.3515	145	wt	2.16418
54695_2456956_6521478_1	54695	10	D01	16909	71	4777.04	6305.03	50.9738	145	wt	2.04225
54695_2456956_6521490_1	54695	11	D01	16909	68	4742.1	6103.38	52.5061	151	wt	2.22059
54695_2456956_6521502_1	54695	12	D01	16909	72	5190.96	6078.25	55.941	150	wt	2.08333
54695_2456956_6521514_1	54695	13	D01	16909	72	4857.33	6042.7	49.7991	144	wt	2
54695_2456957_6521371_1	54695	1	E01	16909	18		1298.56		0	trafE KO	0
54695_2456957_6521383_1	54695	2	E01	16909	17	176.11	1363.32	1.50674	7	trafE KO	0.411765
54695_2456957_6521395_1	54695	3	E01	16909	17	200.218	1155.54	1.90258	6	trafE KO	0.352941
54695_2456957_6521407_1	54695	4	E01	16909	18	619.45	1419.1	2.68149	13	trafE KO	0.722222
54695_2456957_6521419_1	54695	5	E01	16909	22	717.72	1592.75	3.42209	14	trafE KO	0.636364
54695_2456957_6521431_1	54695	6	E01	16909	22	313.607	1581.11	1.78766	6	trafE KO	0.272727
54695_2456957_6521443_1	54695	7	E01	16909	21	556.933	1650.98	2.23457	9	trafE KO	0.428571
54695_2456957_6521455_1	54695	8	E01	16909	21	258.24	1547.81	0.855523	4	trafE KO	0.190476
54695_2456957_6521467_1	54695	9	E01	16909	22	179.379	1623.4	1.20029	5	trafE KO	0.227273
54695_2456957_6521479_1	54695	10	E01	16909	23	309.521	1757.83	1.68551	5	trafE KO	0.217391
54695_2456957_6521491_1	54695	11	E01	16909	24	291.542	1732.5	0.561836	3	trafE KO	0.125
54695_2456957_6521503_1	54695	12	E01	16909	21	204.1	1408.88	0.906599	5	trafE KO	0.238095
54695_2456957_6521515_1	54695	13	E01	16909	22	158.54	1544.54	0.625681	3	trafE KO	0.136364
54695_2456958_6521372_1	54695	1	E01	16909	29	244.756	1913.31	0.817216	4	trafE KO	0.137931
54695_2456958_6521384_1	54695	2	E01	16909	29	589.417	2179.72	2.74533	13	trafE KO	0.448276
54695_2456958_6521396_1	54695	3	E01	16909	36	716.494	2648.6	4.97991	16	trafE KO	0.444444
54695_2456958_6521408_1	54695	4	E01	16909	34	767.57	2493.94	3.24333	13	trafE KO	0.382353
54695_2456958_6521420_1	54695	5	E01	16909	35	898.733	2484.95	3.15394	14	trafE KO	0.4
54695_2456958_6521432_1	54695	6	E01	16909	38	832.947	2623.47	2.29842	12	trafE KO	0.315789
54695_2456958_6521444_1	54695	7	E01	16909	37	752.043	2538.48	2.20904	11	trafE KO	0.297297
54695_2456958_6521456_1	54695	8	E01	16909	36	695.655	2628.17	1.8515	8	trafE KO	0.222222
54695_2456958_6521468_1	54695	9	E01	16909	36	153.637	2583.22	0.804447	4	trafE KO	0.111111
54695_2456958_6521480_1	54695	10	E01	16909	37	538.75	2662.69	2.56657	10	trafE KO	0.27027
54695_2456958_6521492_1	54695	11	E01	16909	40	470.716	2582.61	2.00473	7	trafE KO	0.175
54695_2456958_6521504_1	54695	12	E01	16909	38	346.704	2462.07	0.983213	5	trafE KO	0.131579
54695_2456958_6521516_1	54695	13	E01	16909	34	326.069	2285.55	1.69828	7	trafE KO	0.205882
54695_2456959_6521373_1	54695	1	F01	16909	23	653.773	2256.54	3.05179	8	wt	0.347826
54695_2456959_6521385_1	54695	2	F01	16909	24	1410.11	2399.55	8.75953	28	wt	1.16667
54695_2456959_6521397_1	54695	3	F01	16909	23	1616.04	2202.19	9.35968	35	wt	1.52174
54695_2456959_6521409_1	54695	4	F01	16909	22	2072.05	2485.97	12.2965	40	wt	1.81818
54695_2456959_6521421_1	54695	5	F01	16909	24	1854.67	2349.9	12.5647	43	wt	1.79167
54695_2456959_6521433_1	54695	6	F01	16909	27	1928.83	2516.21	11.6453	35	wt	1.2963
54695_2456959_6521445_1	54695	7	F01	16909	26	1698.79	2294.33	10.3557	31	wt	1.19231
54695_2456959_6521457_1	54695	8	F01	16909	26	1323.28	2159.29	14.1097	41	wt	1.57692
54695_2456959_6521469_1	54695	9	F01	16909	27	1678.56	2295.36	14.2757	39	wt	1.44444
54695_2456959_6521481_1	54695	10	F01	16909	26	1319.6	2198.92	10.5727	30	wt	1.15385
54695_2456959_6521493_1	54695	11	F01	16909	26	1598.07	2172.36	17.2509	49	wt	1.88462
54695_2456959_6521505_1	54695	12	F01	16909	27	1601.33	2126.8	16.0379	46	wt	1.7037
54695_2456959_6521517_1	54695	13	F01	16909	25	1528.6	2180.74	14.1097	41	wt	1.64
54695_2456960_6521374_1	54695	1	F01	16909	66	1761.92	6390.22	5.78436	24	wt	0.363636
54695_2456960_6521386_1	54695	2	F01	16909	58	4566.6	6607.4	31.8331	100	wt	1.72414
54695_2456960_6521398_1	54695	3	F01	16909	55	5029.35	6651.12	37.5664	127	wt	2.30909
54695_2456960_6521410_1	54695	4	F01	16909	56	5045.29	6884.23	33.1228	110	wt	1.96429
54695_2456960_6521422_1	54695	5	F01	16909	64	4529.83	6822.94	31.0542	101	wt	1.57812
54695_2456960_6521434_1	54695	6	F01	16909	60	4832.2	6592.48	41.2439	127	wt	2.11667
54695_2456960_6521446_1	54695	7	F01	16909	65	5016.28	6538.34	45.5981	142	wt	2.18462
54695_2456960_6521458_1	54695	8	F01	16909	61	5874.56	6458.66	56.6944	171	wt	2.80328
54695_2456960_6521470_1	54695	9	F01	16909	64	5896.62	6587.37	60.7038	166	wt	2.59375
54695_2456960_6521482_1	54695	10	F01	16909	63	5533.57	6256.61	57.3328	165	wt	2.61905
54695_2456960_6521494_1	54695	11	F01	16909	63	5663.1	6024.72	62.9001	174	wt	2.7619
54695_2456960_6521506_1	54695	12	F01	16909	60	5236.72	5653.3	59.7845	167	wt	2.78333
54695_2456960_6521518_1	54695	13	F01	16909	61	4537.18	5327.02	65.9263	159	wt	2.60656
54695_2456961_6521375_1	54695	1	G01	16909	17		1204.98		0	trafE KO	0
54695_2456961_6521387_1	54695	2	G01	16909	19	521.792	1287.93	2.36226	10	trafE KO	0.526316
54695_2456961_6521399_1	54695	3	G01	16909	18	390.016	1251.57	3.81793	12	trafE KO	0.666667
54695_2456961_6521411_1	54695	4	G01	16909	21	799.237	1574.57	5.42683	19	trafE KO	0.904762
54695_2456961_6521423_1	54695	5	G01	16909	20	511.782	1418.69	4.66068	16	trafE KO	0.8
54695_2456961_6521435_1	54695	6	G01	16909	21	419.436	1555.37	4.85222	15	trafE KO	0.714286
54695_2456961_6521447_1	54695	7	G01	16909	24	535.685	1601.13	3.56255	14	trafE KO	0.583333
54695_2456961_6521459_1	54695	8	G01	16909	24	321.37	1535.75	1.91535	6	trafE KO	0.25
54695_2456961_6521471_1	54695	9	G01	16909	25	225.756	1671.62	0.753371	4	trafE KO	0.16
54695_2456961_6521483_1	54695	10	G01	16909	26	256.606	1687.55	0.89383	4	trafE KO	0.153846
54695_2456961_6521495_1	54695	11	G01	16909	23	134.432	1609.1	0.459684	3	trafE KO	0.130435
54695_2456961_6521507_1	54695	12	G01	16909	19	266.208	1310.2	0.63845	4	trafE KO	0.210526
54695_2456961_6521519_1	54695	13	G01	16909	22	157.314	1389.88	1.00875	4	trafE KO	0.181818
54695_2456962_6521376_1	54695	1	G01	16909	23	72.5279	1562.52	0.114921	1	trafE KO	0.0434783
54695_2456962_6521388_1	54695	2	G01	16909	24	715.064	1825.05	3.01348	13	trafE KO	0.541667
54695_2456962_6521400_1	54695	3	G01	16909	26	418.619	1868.77	3.81793	14	trafE KO	0.538462
54695_2456962_6521412_1	54695	4	G01	16909	25	811.7	1848.95	3.67747	11	trafE KO	0.44
54695_2456962_6521424_1	54695	5	G01	16909	25	434.963	1726.37	3.07733	11	trafE KO	0.44
54695_2456962_6521436_1	54695	6	G01	16909	25	854.808	1837.31	6.14189	20	trafE KO	0.8
54695_2456962_6521448_1	54695	7	G01	16909	25	414.533	1796.45	1.83874	9	trafE KO	0.36
54695_2456962_6521460_1	54695	8	G01	16909	26	166.303	1951.1	1.09813	4	trafE KO	0.153846
54695_2456962_6521472_1	54695	9	G01	16909	28	275.402	1941.91	0.804447	4	trafE KO	0.142857
54695_2456962_6521484_1	54695	10	G01	16909	28	268.251	1916.78	1.02152	5	trafE KO	0.178571
54695_2456962_6521496_1	54695	11	G01	16909	27	148.325	1793.79	0.881061	3	trafE KO	0.111111
54695_2456962_6521508_1	54695	12	G01	16909	21	226.369	1495.3	0.804447	5	trafE KO	0.238095
54695_2456962_6521520_1	54695	13	G01	16909	23	268.047	1497.96	1.25136	6	trafE KO	0.26087
