# Supplementary material for: A TRAF-like E3 ubiquitin ligase TrafE coordinates ESCRT and autophagy in endolysosomal damage response and cell-autonomous immunity to Mycobacterium marinum
Source: eLife. 2023 Apr 18;12:e85727. doi: 10.7554/eLife.85727 (PMC10181826; doi:10.7554/eLife.85727)
Supplement: Figure 10—figure supplement 1—source data 1. [file elife-85727-fig10-figsupp1-data1.xlsx]

## Sheet: 44241-2_Alix
Plate ID	Well Name	Site ID	MEASUREMENT SET ID	Cell: Dicty with dot_FITC_Features Count_Sum (Lyudmil)	Cell: Dicty with dot_FITC_Area_Sum (Lyudmil)	Cell: Dicty with dot_FITC_Integrated Intensity_Sum (Lyudmil)	Cell: Dicty no dot_FITC_Features Count_Sum (Lyudmil)	Cell: dot_FITC_Features Count_Sum (Lyudmil)	Cell: Dicty no dot_FITC_Area_Sum (Lyudmil)	Cell: Dicty no dot_FITC_Integrated Intensity_Sum (Lyudmil)	Cell: dot_FITC_Area_Sum (Lyudmil)	Cell: dot_FITC_Integrated Intensity_Sum (Lyudmil)		normalized_area	normalized_dot_count	Well Name	average nb of structures	Strain	Well Name	condition
44241	B01	1	15969	3	934.984	96668768	23	4	3312.62	304158272	0.331994	41229		0.00035508	1.33333	B01	1.33333	wt	B01	control	0.153846
44241	B01	2	15969	7	1405.57	143844144	45	15	6034.91	578664896	7.4954	911929		0.00533263	2.14286	B01	2.14286	wt	B01	control	0.288462
44241	B01	3	15969	5	872.416	89167856	33	9	4269.52	401311552	2.31119	290510		0.00264918	1.8	B01	1.8	wt	B01	control	0.236842
44241	B01	4	15969	6	949.784	95107216	25	8	3897.85	373245120	1.55782	198663		0.00164018	1.33333	B01	1.33333	wt	B01	control	0.258065
44241	B01	5	15969	9	1885.2	193241376	31	20	5157.54	493101504	5.35021	717908		0.002838	2.22222	B01	2.22222	wt	B01	control	0.5
44241	B01	6	15969	6	1273.67	123563336	31	9	4996.45	469352384	4.45638	545556		0.00349885	1.5	B01	1.5	wt	B01	control	0.243243
44241	B01	7	15969	10	1750.18	172692976	35	18	5298.94	520809440	7.67417	970412		0.00438478	1.8	B01	1.8	wt	B01	control	0.4
44241	B01	8	15969	4	939.913	102884080	25	6	4518.13	436736448	0.651219	80089		0.00069285	1.5	B01	1.5	wt	B01	control	0.206897
44241	B01	9	15969	4	383.159	35509112	48	8	7129.48	694280384	4.69899	634635		0.0122638	2	B01	2	wt	B01	control	0.153846
44242	B02	1	15970	3	856.877	90482392	49	4	6909.14	662607808	2.06858	274330		0.00241409	1.33333	B02	1.33333	wt	B02	control	0.0769231
44242	B02	2	15970	2	364.172	33824112	35	2	5775.5	535381792	1.35351	189579		0.00371669	1	B02	1	wt	B02	control	0.0540541
44242	B02	3	15970	3	606.706	61633628	46	4	6268.71	601031808	0.574605	70182		0.000947089	1.33333	B02	1.33333	wt	B02	control	0.0816327
44242	B02	4	15970	2	399.67	37546996	30	2	4949.9	468835200	1.99196	242911		0.00498402	1	B02	1	wt	B02	control	0.0625
44242	B02	6	15970	4	895.809	92002008	38	6	5400.96	511452224	2.56657	322870		0.00286508	1.5	B02	1.5	wt	B02	control	0.142857
44242	B02	7	15970	4	727.565	72317984	34	9	4604.48	426850624	1.09813	135243		0.00150933	2.25	B02	2.25	wt	B02	control	0.236842
44242	B02	8	15970	3	549.271	54307372	30	6	4415.25	415322272	1.43013	181038		0.00260368	2	B02	2	wt	B02	control	0.181818
44242	B02	9	15970	3	406.003	38802808	34	4	4988.89	470798240	0.817216	95971		0.00201283	1.33333	B02	1.33333	wt	B02	control	0.108108
44242	B03	1	15970	5	996.518	103074480	35	6	5363.85	506791520	1.16198	149020		0.00116604	1.2	B03	1.2	wt	B03	control	0.15
44242	B03	2	15970	7	1355.11	135199232	39	9	6683.69	629047168	2.42611	297813		0.00179034	1.28571	B03	1.28571	wt	B03	control	0.195652
44242	B03	3	15970	8	1496.4	152558864	32	26	4707.3	447567392	7.18895	860006		0.00480416	3.25	B03	3.25	wt	B03	control	0.65
44242	B03	4	15970	8	1693.78	168166144	28	14	4923.92	472171520	8.46585	1099022		0.00499819	1.75	B03	1.75	wt	B03	control	0.388889
44242	B03	5	15970	10	2161.31	217298176	47	22	7388.99	710311488	7.53371	970266		0.00348572	2.2	B03	2.2	wt	B03	control	0.385965
44242	B03	6	15970	5	843.724	84091128	27	7	4565.63	416926784	5.73328	666782		0.00679521	1.4	B03	1.4	wt	B03	control	0.21875
44242	B03	7	15970	7	1255.27	121530168	39	8	5129.44	490784480	1.71105	215855		0.00136309	1.14286	B03	1.14286	wt	B03	control	0.173913
44242	B03	8	15970	6	1376.74	141176240	37	12	5377.42	501803264	9.58952	1197718		0.00696538	2	B03	2	wt	B03	control	0.27907
44242	B03	9	15970	5	1120.17	106845488	31	10	4757.67	443876000	4.67345	554173		0.00417208	2	B03	2	wt	B03	control	0.277778
44242	B04	1	15970	11	1860.75	193093056	16	33	2128.62	199842048	7.4954	904186		0.00402816	3	B04	3	wt	B04	starvation	1.22222
44242	B04	2	15970	17	4013.41	423745184	14	64	2573	256846032	18.7194	2434010		0.0046642	3.76471	B04	3.76471	wt	B04	starvation	2.06452
44242	B04	3	15970	22	4508.43	477047488	19	111	2603.88	257505696	28.5515	3622852		0.00633291	5.04545	B04	5.04545	wt	B04	starvation	2.70732
44242	B04	4	15970	12	3234.87	341583264	9	49	1497.02	151015504	17.2509	2349142		0.0053328	4.08333	B04	4.08333	wt	B04	starvation	2.33333
44242	B04	5	15970	28	7816.59	837651648	26	153	3425	338790752	48.037	6618567		0.00614551	5.46429	B04	5.46429	wt	B04	starvation	2.83333
44242	B04	6	15970	17	3860.29	409978048	17	54	2618.23	260950224	15.7314	2018980		0.00407519	3.17647	B04	3.17647	wt	B04	starvation	1.58824
44242	B04	7	15970	21	4542.5	480615104	18	100	2432.26	243861104	28.6026	3733156		0.00629666	4.7619	B04	4.7619	wt	B04	starvation	2.5641
44242	B04	8	15970	14	3220.85	334717728	10	56	1863.85	187763344	13.6756	1795768		0.00424596	4	B04	4	wt	B04	starvation	2.33333
44242	B04	9	15970	19	3810.79	396384064	22	76	3438.91	338888832	23.4694	2902865		0.00615867	4	B04	4	wt	B04	starvation	1.85366
44242	B05	1	15970	17	2744.44	277217024	16	51	2479.11	247096320	14.6333	1704366		0.00533197	3	B05	3	wt	B05	starvation	1.54545
44242	B05	2	15970	13	2406.87	239277200	10	39	1716.55	166930032	13.5224	1642460		0.00561825	3	B05	3	wt	B05	starvation	1.69565
44242	B05	3	15970	12	1975.48	203631776	13	48	2112.16	206779152	14.8887	1727044		0.00753673	4	B05	4	wt	B05	starvation	1.92
44242	B05	4	15970	14	2759.47	285549792	11	69	2034.41	197933264	23.0608	2910251		0.00835697	4.92857	B05	4.92857	wt	B05	starvation	2.76
44242	B05	5	15970	22	5293.41	561429120	22	73	3646.66	370233376	22.4862	2921417		0.00424796	3.31818	B05	3.31818	wt	B05	starvation	1.65909
44242	B05	6	15970	12	3457.85	370056864	8	54	1167.23	117805888	12.6924	1596674		0.00367061	4.5	B05	4.5	wt	B05	starvation	2.7
44242	B05	7	15970	21	5145.04	553833024	13	95	1875.41	181186112	21.5285	2579161		0.00418433	4.52381	B05	4.52381	wt	B05	starvation	2.79412
44242	B05	8	15970	32	6616.26	682591552	10	147	1449.18	135554688	47.0027	5957089		0.00710412	4.59375	B05	4.59375	wt	B05	starvation	3.5
44242	B05	9	15970	19	3886.56	399481408	19	72	2405.53	235055984	25.4869	3045496		0.0065577	3.78947	B05	3.78947	wt	B05	starvation	1.89474
44242	B06	1	15970	16	2800.55	295152704	12	76	2113.32	210455120	26.5723	3517215		0.00948825	4.75	B06	4.75	wt	B06	starvation	2.71429
44242	B06	2	15970	10	2137.11	222526400	19	52	3375.26	324796480	15.8846	2133424		0.00743277	5.2	B06	5.2	wt	B06	starvation	1.7931
44242	B06	3	15970	12	2324.49	232284544	12	39	1854.45	178897552	10.3429	1244535		0.00444952	3.25	B06	3.25	wt	B06	starvation	1.625
44242	B06	4	15970	22	4535.19	473655136	18	72	2726.08	267611648	18.4384	2430379		0.00406564	3.27273	B06	3.27273	wt	B06	starvation	1.8
44242	B06	5	15970	35	10552.7	1160714880	24	186	2911.2	293289376	44.0275	5932366		0.00417215	5.31429	B06	5.31429	wt	B06	starvation	3.15254
44242	B06	6	15970	17	3716.47	395923552	20	82	3326.75	334162176	24.5931	3246068		0.00661733	4.82353	B06	4.82353	wt	B06	starvation	2.21622
44242	B06	7	15970	28	5204.61	553652352	19	150	2644.59	257003504	31.6544	3796606		0.00608199	5.35714	B06	5.35714	wt	B06	starvation	3.19149
44242	B06	8	15970	18	3654.74	381584224	14	53	2297.09	222510224	8.32539	1106355		0.00227797	2.94444	B06	2.94444	wt	B06	starvation	1.65625
44242	B06	9	15970	13	2228.36	228884288	8	33	1144.98	106960120	12.2838	1519115		0.00551248	2.53846	B06	2.53846	wt	B06	starvation	1.57143
44242	B07	1	15970	1	219.154	20006252	7	1	795.113	68821168	0.178766	15424		0.000815708	1	B07	1	atg1 KO	B07	control	0.125
44242	B07	3	15970	2	212.859	18034814	15	3	2105.7	182724704	1.8132	205813		0.0085183	1.5	B07	1.5	atg1 KO	B07	control	0.176471
44242	B07	4	15970	2	307.924	25374886	7	2	973.087	88380136	1.05983	125945		0.00344184	1	B07	1	atg1 KO	B07	control	0.222222
44242	B07	7	15970	1	52.1103	4282079	10	1	1393.63	119323664	0.395839	51417		0.00759618	1	B07	1	atg1 KO	B07	control	0.0909091
44242	B07	8	15970	1	94.082	8436108	19	3	1948.86	167869648	2.27288	290273		0.0241585	3	B07	3	atg1 KO	B07	control	0.15
44242	B08	2	15970	2	299.586	26148136	17	2	2230.35	194789840	0.702295	85221		0.00234422	1	B08	1	atg1 KO	B08	control	0.105263
44242	B08	3	15970	6	541.316	44766392	24	9	2360.59	207798576	6.05251	780301		0.0111811	1.5	B08	1.5	atg1 KO	B08	control	0.3
44242	B08	5	15970	2	367.671	30790286	35	3	4162.62	366937184	2.05581	273269		0.00559144	1.5	B08	1.5	atg1 KO	B08	control	0.0810811
44242	B08	6	15970	3	220.074	18558808	23	6	2984.78	266194832	2.97518	375994		0.013519	2	B08	2	atg1 KO	B08	control	0.230769
44242	B08	7	15970	1	81.8493	5768518	20	1	2345.55	202096896	0.204304	27769		0.0024961	1	B08	1	atg1 KO	B08	control	0.047619
44242	B08	8	15970	3	318.65	28358892	17	4	2087.11	187381104	3.38379	448990		0.0106191	1.33333	B08	1.33333	atg1 KO	B08	control	0.2
44242	B08	9	15970	3	264.28	23309624	25	7	2703.36	241789072	3.69024	499040		0.0139634	2.33333	B08	2.33333	atg1 KO	B08	control	0.25
44242	B09	1	15970	2	155.373	12798240	5	3	665.52	56719736	1.49397	181655		0.00961538	1.5	B09	1.5	atg1 KO	B09	control	0.428571
44242	B09	2	15970	1	90.047	7458823	13	2	1807.38	154867616	0.689526	99320		0.0076574	2	B09	2	atg1 KO	B09	control	0.142857
44242	B09	3	15970	3	318.191	26690976	27	3	2705.34	241559936	2.86026	338582		0.00898913	1	B09	1	atg1 KO	B09	control	0.1
44242	B09	6	15970	3	509.036	41752748	16	5	1593.6	136906480	2.88579	354018		0.00566913	1.66667	B09	1.66667	atg1 KO	B09	control	0.263158
44242	B09	9	15970	1	60.1675	4835923	19	2	2373.5	205447056	1.8515	205970		0.0307725	2	B09	2	atg1 KO	B09	control	0.1
44242	E01	1	15970	1	187.219	17910882	3	1	308.218	27637144	0.217073	32539		0.00115946	1	E01	1	trafE KO	E01	control	0.25
44242	E01	7	15970	4	574.247	53494188	4	9	613.576	54651996	1.77489	213525		0.00309081	2.25	E01	2.25	trafE KO	E01	control	1.125
44242	E01	9	15970	4	497.327	46640244	5	10	627.609	54610368	1.77489	207066		0.00356886	2.5	E01	2.5	trafE KO	E01	control	1.11111
44242	E02	3	15970	12	1764.84	170425216	16	22	1741.13	157629696	6.88249	809654		0.00389978	1.83333	E02	1.83333	trafE KO	E02	control	0.785714
44242	E02	7	15970	1	101.335	8477551	0	1			0.191535	18002		0.00189012	1	E02	1	trafE KO	E02	control	1
44242	E02	9	15970	2	416.154	39135036	8	6	1175.72	105001592	1.34075	166911		0.00322175	3	E02	3	trafE KO	E02	control	0.6
44242	E03	1	15970	3	796.403	82029960	11	9	1774.15	157872720	2.11965	244594		0.00266154	3	E03	3	trafE KO	E03	control	0.642857
44242	E03	3	15970	13	1929.4	187379264	19	19	2722.49	248889200	6.35896	749148		0.00329583	1.46154	E03	1.46154	trafE KO	E03	control	0.59375
44242	E03	7	15970	6	931.894	90299128	10	14	1327.95	120663120	3.48594	377868		0.0037407	2.33333	E03	2.33333	trafE KO	E03	control	0.875
44242	E03	9	15970	9	1260.81	119835208	17	15	2353.56	209241424	3.9967	475704		0.00316994	1.66667	E03	1.66667	trafE KO	E03	control	0.576923
44242	E04	1	15970	10	1912.26	207065904	2	75	123.706	10215669	20.4687	2490002		0.0107039	7.5	E04	7.5	trafE KO	E04	starvation	6.25
44242	E04	3	15970	24	5556.65	600193408	5	265	761.249	75680136	78.7209	9333010		0.014167	11.0417	E04	11.0417	trafE KO	E04	starvation	9.13793
44242	E04	5	15970	1	185.751	19487848	0	15			5.43959	706259		0.0292844	15	E04	15	trafE KO	E04	starvation	15
44242	E04	6	15970	1	234.286	25545596	0	15			2.82195	375780		0.0120449	15	E04	15	trafE KO	E04	starvation	15
44242	E04	7	15970	3	553.23	53293968	0	16			3.58809	400430		0.00648571	5.33333	E04	5.33333	trafE KO	E04	starvation	5.33333
44242	E04	9	15970	20	4160.18	434820512	1	140	62.2106	5306976	40.3628	4714365		0.00970218	7	E04	7	trafE KO	E04	starvation	6.66667
44242	E05	1	15970	16	3363.05	347556736	2	118	92.3837	7744847	34.8849	4117231		0.010373	7.375	E05	7.375	trafE KO	E05	starvation	6.55556
44242	E05	3	15970	40	8309.75	883218816	4	347	360.533	34091192	93.1626	10924666		0.0112112	8.675	E05	8.675	trafE KO	E05	starvation	7.88636
44242	E05	6	15970	1	94.1586	8745156	0	2			0.472453	47475		0.00501763	2	E05	2	trafE KO	E05	starvation	2
44242	E05	7	15970	13	2128.22	223785424	0	103			31.9991	3858097		0.0150356	7.92308	E05	7.92308	trafE KO	E05	starvation	7.92308
44242	E05	8	15970	1	128.737	11873439	0	6			1.94089	239739		0.0150764	6	E05	6	trafE KO	E05	starvation	6
44242	E05	9	15970	24	4871.96	493726112	2	142	227.505	19459392	41.7929	5150871		0.00857826	5.91667	E05	5.91667	trafE KO	E05	starvation	5.46154
44242	E06	3	15970	5	845.116	82895536	0	26			7.20172	835041		0.00852157	5.2	E06	5.2	trafE KO	E06	starvation	5.2
44242	E06	5	15970	1	140.753	11786420	0	2			0.689526	84640		0.00489885	2	E06	2	trafE KO	E06	starvation	2
44242	E06	9	15970	16	3674.69	404644320	3	194	279.003	23763084	49.8757	5573675		0.0135728	12.125	E06	12.125	trafE KO	E06	starvation	10.2105
44242	E07	1	15970	1	95.9718	8243379	9	1	1088.9	93066344	0.370301	37721		0.00385843	1	E07	1	atg1 KO	E07	starvation	0.1
44242	E07	3	15970	2	173.352	15100811	11	4	1328.63	114546856	1.20029	129272		0.00692398	2	E07	2	atg1 KO	E07	starvation	0.307692
44242	E07	4	15970	1	126.707	10043152	0	3			2.42611	330903		0.0191474	3	E07	3	atg1 KO	E07	starvation	3
44242	E07	6	15970	2	227.058	18895888	3	2	402.785	31782120	0.497991	57786		0.00219323	1	E07	1	atg1 KO	E07	starvation	0.4
44242	E07	9	15970	3	208.914	16971184	10	4	997.399	86127552	3.16671	411349		0.015158	1.33333	E07	1.33333	atg1 KO	E07	starvation	0.307692
44242	E08	1	15970	1	82.2324	6851141	0	1			0.114921	17748		0.00139752	1	E08	1	atg1 KO	E08	starvation	1
44242	E08	3	15970	2	159.715	12288824	7	2	477.803	37619784	2.0175	172827		0.0126319	1	E08	1	atg1 KO	E08	starvation	0.222222
44242	E08	9	15970	1	89.7788	8092421	7	5	564.249	47102316	2.27288	304861		0.0253165	5	E08	5	atg1 KO	E08	starvation	0.625
44242	E09	3	15970	4	274.968	23185368	14	7	1491.79	124631328	5.55452	666681		0.0202006	1.75	E09	1.75	atg1 KO	E09	starvation	0.388889
44242	E09	6	15970	5	410.792	35904660	10	12	1039.18	87316632	8.18493	1037222		0.0199248	2.4	E09	2.4	atg1 KO	E09	starvation	0.8
44242	E09	8	15970	1	53.2084	4072274	0	1			1.22582	166103		0.0230382	1	E09	1	atg1 KO	E09	starvation	1
44242	E09	9	15970	3	230.506	18479670	9	4	1087.87	93692752	2.09412	257879		0.00908487	1.33333	E09	1.33333	atg1 KO	E09	starvation	0.333333
