# Supplementary material for: A TRAF-like E3 ubiquitin ligase TrafE coordinates ESCRT and autophagy in endolysosomal damage response and cell-autonomous immunity to Mycobacterium marinum
Source: eLife. 2023 Apr 18;12:e85727. doi: 10.7554/eLife.85727 (PMC10181826; doi:10.7554/eLife.85727)
Supplement: Figure 10—figure supplement 1—source data 2. [file elife-85727-fig10-figsupp1-data2.xlsx]

## Sheet: VPS32.1_pipeline
Plate ID	Well Name	Site ID	MEASUREMENT SET ID	Cell: Dicty with dot_FITC_Features Count_Sum (Lyudmil)	Cell: Dicty with dot_FITC_Area_Sum (Lyudmil)	Cell: Dicty with dot_FITC_Integrated Intensity_Sum (Lyudmil)	Cell: Dicty no dot_FITC_Features Count_Sum (Lyudmil)	Cell: dot_FITC_Features Count_Sum (Lyudmil)	Cell: Dicty no dot_FITC_Area_Sum (Lyudmil)	Cell: Dicty no dot_FITC_Integrated Intensity_Sum (Lyudmil)	Cell: dot_FITC_Area_Sum (Lyudmil)	Cell: dot_FITC_Integrated Intensity_Sum (Lyudmil)	Average nb of structures	Well Name	Condition	Strain
44481	D02	1	16583	85	13326.6	2135799040	10	713	872.965	126838560	60.0143	10550874	8.38824	D02	Starvation	atg1 KO
44481	D02	2	16583	95	15517.1	2556920576	12	803	1143.27	163349872	67.1777	12010182	8.45263	D02	Starvation	atg1 KO
44481	D02	3	16583	100	14147.9	2298146560	13	814	1238.27	186726544	67.548	11689285	8.14	D02	Starvation	atg1 KO
													#DIV/0!
													#DIV/0!
44481	D02	6	16583	92	14766.1	2374917888	18	703	1332.39	195216224	60.5251	10367054	7.6413	D02	Starvation	atg1 KO
44481	D02	7	16583	81	12599.9	2017433984	22	664	1733.65	253969552	52.9658	9054584	8.19753	D02	Starvation	atg1 KO
44481	D02	8	16583	98	13839.7	2207951872	13	837	1089.55	154605232	72.2087	12481540	8.54082	D02	Starvation	atg1 KO
44481	D02	9	16583	97	13339	2121997312	20	680	1566.82	229533008	56.5922	9599071	7.01031	D02	Starvation	atg1 KO
44481	D03	1	16583	100	14440.6	2343790336	14	869	1230.13	180031952	68.0205	11989971	8.69	D03	Starvation	atg1 KO
44481	D03	2	16583	82	12099.3	1939319040	14	689	1094.8	159869904	58.3033	10191875	8.40244	D03	Starvation	atg1 KO
44481	D03	3	16583	97	14573.2	2377654784	16	795	1338.84	191132576	64.8154	11414326	8.19588	D03	Starvation	atg1 KO
44481	D03	4	16583	89	13502.1	2164324096	14	750	1163.14	167388832	67.0883	11647040	8.42697	D03	Starvation	atg1 KO
44481	D03	5	16583	97	14464.2	2330391296	15	877	1135.19	166091408	72.2342	12642119	9.04124	D03	Starvation	atg1 KO
44481	D03	6	16583	89	12620.1	2021410304	17	685	1440.1	204756480	53.8213	9175472	7.69663	D03	Starvation	atg1 KO
44481	D03	7	16583	101	14831.2	2373937920	15	790	1093.15	154029696	72.3747	12706470	7.82178	D03	Starvation	atg1 KO
													#DIV/0!
44481	D03	9	16583	92	14140.9	2263198976	14	663	1720.98	253156064	56.0942	9762471	7.20652	D03	Starvation	atg1 KO
44481	D04	1	16583	90	15389.9	2522940928	6	926	670.066	97557280	80.8788	14640191	10.2889	D04	Starvation	atg1 KO
													#DIV/0!
44481	D04	3	16583	84	13375.2	2143430400	20	603	1586.71	234133744	50.1439	8543922	7.17857	D04	Starvation	atg1 KO
44481	D04	4	16583	87	12637.3	2025904512	23	618	2275.45	335247456	46.7473	7907823	7.10345	D04	Starvation	atg1 KO
44481	D04	5	16583	59	11009.9	1780716416	28	544	2872.69	431199712	42.2015	7132806	9.22034	D04	Starvation	atg1 KO
44481	D04	6	16583	76	12106.6	1942776320	29	622	2500.11	364772480	49.5948	8283150	8.18421	D04	Starvation	atg1 KO
44481	D04	7	16583	92	13515.8	2180006656	12	805	1028.99	157058752	62.9639	10867393	8.75	D04	Starvation	atg1 KO
44481	D04	8	16583	83	11815.8	1876063232	23	607	2044.05	294324832	51.3952	8774632	7.31325	D04	Starvation	atg1 KO
44481	D04	9	16583	73	12747.3	2053628288	19	589	1903.6	273615424	46.5047	7913193	8.06849	D04	Starvation	atg1 KO
44481	D05	1	16583	104	17792	3008682752	7	1144	685.07	99097432	101.833	18995990	11	D05	Control	atg1 KO
44481	D05	2	16583	105	12813	2171706880	42	589	3294.53	514399456	47.4751	8295522	5.60952	D05	Control	atg1 KO
44481	D05	3	16583	106	16812	2804652288	6	1125	392.66	60647956	97.1849	17976984	10.6132	D05	Control	atg1 KO
44481	D05	4	16583	100	17599	3003068160	10	1127	784.63	112000096	102.318	19265078	11.27	D05	Control	atg1 KO
44481	D05	5	16583	92	15727.3	2626371584	18	777	1404.76	207925520	61.0614	10742064	8.44565	D05	Control	atg1 KO
44481	D05	6	16583	99	16761.6	2824386560	6	1050	658.931	100349296	90.4301	16653663	10.6061	D05	Control	atg1 KO
44481	D05	7	16583	92	17823.3	2971825664	3	1187	272.797	42150816	106.136	19770630	12.9022	D05	Control	atg1 KO
44481	D05	8	16583	110	19082.9	3249503744	5	1187	270.869	37947828	107.502	20597000	10.7909	D05	Control	atg1 KO
44481	D05	9	16583	99	18516.7	3126206976	2	1088	129.018	20741072	94.2352	17389540	10.9899	D05	Control	atg1 KO
44481	D06	1	16583	97	18676.7	3192393728	7	1238	458.867	68697376	106.877	20110516	12.7629	D06	Control	atg1 KO
44481	D06	2	16583	95	17757.6	3022484224	7	992	466.924	69178472	85.1182	15921390	10.4421	D06	Control	atg1 KO
44481	D06	3	16583	108	19022.4	3267457024	3	1140	291.631	40339060	95.3972	17800924	10.5556	D06	Control	atg1 KO
44481	D06	4	16583	97	18387.7	3136251392	4	1104	350.547	52219584	94.5161	17550804	11.3814	D06	Control	atg1 KO
44481	D06	5	16583	102	19568.4	3357619712	1	1171	58.9289	7280063	99.7387	18839764	11.4804	D06	Control	atg1 KO
44481	D06	6	16583	98	17645.9	3005847552	6	1014	632.972	93322216	86.7143	16079282	10.3469	D06	Control	atg1 KO
44481	D06	7	16583	109	17993.5	3049364736	5	1021	521.729	80147376	87.9784	16569547	9.36697	D06	Control	atg1 KO
44481	D06	8	16583	86	16056.3	2697699840	5	917	371.782	56136532	76.4735	14133330	10.6628	D06	Control	atg1 KO
44481	D06	9	16583	99	17797.1	3010555136	9	1005	667.972	94840680	85.7949	15955987	10.1515	D06	Control	atg1 KO
44481	D07	1	16583	99	16133	2697053184	9	868	964.315	143005824	75.6308	13843693	8.76768	D07	Control	atg1 KO
44481	D07	2	16583	109	18341.1	3111212288	7	993	556.333	83622120	85.1692	15589442	9.11009	D07	Control	atg1 KO
44481	D07	3	16583	95	16551.5	2768375296	5	933	482.681	70991680	77.4312	14310108	9.82105	D07	Control	atg1 KO
44481	D07	4	16583	96	17123.5	2891105792	6	1037	513.722	73008448	94.7204	17683644	10.8021	D07	Control	atg1 KO
44481	D07	5	16583	92	16471.2	2803211520	12	873	1047.99	154260240	74.5071	13683534	9.48913	D07	Control	atg1 KO
44481	D07	6	16583	93	17418	2904912128	5	885	382.406	54818908	73.8687	13486009	9.51613	D07	Control	atg1 KO
44481	D07	7	16583	87	14857.6	2439620608	5	736	348.198	48920704	55.9282	9979964	8.45977	D07	Control	atg1 KO
44481	D07	8	16583	98	18351.2	3111660544	3	1048	220.15	32625748	88.6807	16818538	10.6939	D07	Control	atg1 KO
44481	D07	9	16583	100	17512.6	2933746176	4	1047	327.525	47379048	93.0222	17000116	10.47	D07	Control	atg1 KO
44481	E02	1	16583	64	13216.5	1367816064	11	410	1270.86	124311632	34.0932	3723765	6.40625	E02	Control	wt
44481	E02	2	16583	70	12677.4	1313036032	16	538	2042.21	203462416	52.7615	5944427	7.68571	E02	Control	wt
44481	E02	3	16583	75	13675.8	1410119296	11	544	1103.73	106107880	49.6969	5584973	7.25333	E02	Control	wt
44481	E02	4	16583	73	13399	1372109696	10	516	976.241	97043272	46.7473	5183892	7.06849	E02	Control	wt
44481	E02	5	16583	71	13716.6	1443912192	17	484	1337.09	137868048	43.5551	5036612	6.8169	E02	Control	wt
44481	E02	6	16583	78	13938.8	1423901056	11	475	1290.35	127350792	38.6773	4341377	6.08974	E02	Control	wt
44481	E02	7	16583	65	11959.4	1236008448	19	455	2125.68	210871584	39.8776	4375766	7	E02	Control	wt
44481	E02	8	16583	77	13413.7	1384373376	12	497	1294.96	128703400	45.4321	5217539	6.45455	E02	Control	wt
44481	E02	9	16583	61	11711.3	1233077760	22	407	2080.89	205856912	33.774	3779107	6.67213	E02	Control	wt
44481	E03	1	16583	78	12774.9	1277372416	15	435	1479.54	144849504	38.7795	4387881	5.57692	E03	Control	wt
44481	E03	2	16583	55	12824.4	1351011328	18	419	1997.43	198830416	36.5321	4090466	7.61818	E03	Control	wt
44481	E03	3	16583	70	13055	1347913088	18	368	2072.56	211294912	29.9178	3326929	5.25714	E03	Control	wt
44481	E03	4	16583	60	12739.5	1299247744	13	397	1455.41	143742272	36.8003	4061312	6.61667	E03	Control	wt
44481	E03	5	16583	68	13193	1364141824	17	429	2073.07	205755664	39.8648	4385872	6.30882	E03	Control	wt
44481	E03	6	16583	58	12789	1323813760	18	364	1916.4	186606272	29.5985	3260013	6.27586	E03	Control	wt
44481	E03	7	16583	68	13269.4	1352658560	14	444	1424.09	141632672	38.0644	4092641	6.52941	E03	Control	wt
44481	E03	8	16583	61	12727.8	1286363776	13	368	2260.07	220840560	31.782	3556013	6.03279	E03	Control	wt
44481	E03	9	16583	58	11646.8	1225844736	20	399	2775.97	282410144	35.8681	4053721	6.87931	E03	Control	wt
44481	E04	1	16583	74	13038.7	1323077504	10	389	1327.54	133087184	32.3822	3577058	5.25676	E04	Control	wt
44481	E04	2	16583	72	13971.7	1477927808	14	465	1450.62	145740608	43.5551	4882429	6.45833	E04	Control	wt
44481	E04	3	16583	54	12131.3	1251047680	17	359	2087.87	206369616	31.9225	3465488	6.64815	E04	Control	wt
44481	E04	4	16583	63	12351.2	1257784576	17	436	1985.86	191870768	39.3285	4428412	6.92063	E04	Control	wt
44481	E04	5	16583	61	12317.4	1256740736	15	451	1804.97	177525568	40.6948	4461105	7.39344	E04	Control	wt
44481	E04	6	16583	54	10627.5	1077852800	20	341	2542.09	247297040	29.9816	3296975	6.31481	E04	Control	wt
44481	E04	7	16583	62	12065.6	1216434560	16	373	1925.95	186356752	30.6584	3347799	6.01613	E04	Control	wt
44481	E04	8	16583	67	12658.6	1315266048	17	415	2013.3	200086592	41.6525	4624895	6.19403	E04	Control	wt
44481	E04	9	16583	69	13537.8	1390606848	13	395	1623.58	162103904	34.6678	3834551	5.72464	E04	Control	wt
44481	E05	1	16583	70	16255.5	1877495808	7	929	503.992	50747492	86.51	12078319	13.2714	E05	Starvation	wt
44481	E05	2	16583	72	16929.8	2014982784	5	1036	369.982	37997388	94.1586	13539092	14.3889	E05	Starvation	wt
44481	E05	3	16583	74	17196.7	2029938432	3	971	287.277	26570916	93.3669	13248553	13.1216	E05	Starvation	wt
44481	E05	4	16583	70	16610.8	1911720192	2	947	162.051	14764960	86.5866	11530742	13.5286	E05	Starvation	wt
44481	E05	5	16583	71	16277.6	1873801600	4	896	500.966	49364792	87.7358	11923206	12.6197	E05	Starvation	wt
44481	E05	6	16583	63	15024	1737791744	7	911	725.828	69372456	79.6658	10912987	14.4603	E05	Starvation	wt
44481	E05	7	16583	73	16121.1	1848734592	7	875	734.805	72248248	80.2659	10700108	11.9863	E05	Starvation	wt
44481	E05	8	16583	77	16481	1866910336	3	890	301.578	28289300	79.4104	10631472	11.5584	E05	Starvation	wt
44481	E05	9	16583	69	15239.2	1710532224	4	763	494.109	47708272	68.6844	8893459	11.058	E05	Starvation	wt
44481	E06	1	16583	66	15901.7	1815794944	8	915	772.742	78620720	82.7048	10742068	13.8636	E06	Starvation	wt
44481	E06	2	16583	70	16544.4	1912984960	6	944	445.293	46301328	85.5906	11002228	13.4857	E06	Starvation	wt
44481	E06	3	16583	72	15686	1758381568	3	852	247.246	23921512	79.1678	10110555	11.8333	E06	Starvation	wt
44481	E06	4	16583	67	16472.4	1914870912	1	1039	46.6835	4028365	94.6055	12946656	15.5075	E06	Starvation	wt
44481	E06	5	16583	64	16000.4	1794811776	0	799			70.9063	9305256	12.4844	E06	Starvation	wt
44481	E06	6	16583	84	16775.3	1912763776	4	874	387.973	38178752	81.977	10903925	10.4048	E06	Starvation	wt
44481	E06	7	16583	75	15593	1749653120	5	877	586.991	58466324	84.2116	10786252	11.6933	E06	Starvation	wt
44481	E06	8	16583	64	15150.1	1677057152	8	709	926.748	91291888	67.7906	8968889	11.0781	E06	Starvation	wt
44481	E06	9	16583	76	14728.1	1658074624	2	880	305.562	30861454	77.2908	9843825	11.5789	E06	Starvation	wt
44481	E07	1	16583	79	16514.3	1955302784	5	961	733.49	75481592	92.2049	14831150	12.1646	E07	Starvation	wt
44481	E07	2	16583	73	16678.9	1948045440	6	853	475.096	46588512	72.8727	9847878	11.6849	E07	Starvation	wt
44481	E07	3	16583	73	16844.5	1966508416	5	791	324.601	33306960	70.5743	9548127	10.8356	E07	Starvation	wt
44481	E07	4	16583	72	16026.3	1834310656	10	833	977.748	99456280	71.7873	9595659	11.5694	E07	Starvation	wt
44481	E07	5	16583	76	16275.9	1895595904	3	895	339.362	32930314	81.1215	11212022	11.7763	E07	Starvation	wt
44481	E07	6	16583	66	15248.7	1677704704	2	657	349.96	33038022	58.3543	7654649	9.95455	E07	Starvation	wt
44481	E07	7	16583	73	15520.9	1772043520	3	872	238.678	22074952	79.6786	10405953	11.9452	E07	Starvation	wt
44481	E07	8	16583	67	14984.2	1692851712	3	719	199.682	19471632	63.679	8105242	10.7313	E07	Starvation	wt
44481	E07	9	16583	57	13711	1510434944	7	621	948.635	94872624	58.4948	7558328	10.8947	E07	Starvation	wt
