# Supplementary material for: A TRAF-like E3 ubiquitin ligase TrafE coordinates ESCRT and autophagy in endolysosomal damage response and cell-autonomous immunity to Mycobacterium marinum
Source: eLife. 2023 Apr 18;12:e85727. doi: 10.7554/eLife.85727 (PMC10181826; doi:10.7554/eLife.85727)
Supplement: Figure 10—figure supplement 1—source data 3. [file elife-85727-fig10-figsupp1-data3.xlsx]

## Sheet: VPS32 pipeline
Plate ID	Well Name	Site ID	MEASUREMENT SET ID	Cell: Dicty with dot_FITC_Features Count_Sum (Lyudmil)	Cell: Dicty with dot_FITC_Area_Sum (Lyudmil)	Cell: Dicty with dot_FITC_Integrated Intensity_Sum (Lyudmil)	Cell: Dicty no dot_FITC_Features Count_Sum (Lyudmil)	Cell: dot_FITC_Features Count_Sum (Lyudmil)	Cell: Dicty no dot_FITC_Area_Sum (Lyudmil)	Cell: Dicty no dot_FITC_Integrated Intensity_Sum (Lyudmil)	Cell: dot_FITC_Area_Sum (Lyudmil)	Cell: dot_FITC_Integrated Intensity_Sum (Lyudmil)	Well Name	Site ID	Average nb of structures	Strain	Condition
44481	D02	1	16584	29	4879.38	796208384	66	54	9320.18	1466429312	11.4283	2176218	D02	1	0.568421	wt	starvation
44481	D02	2	16584	33	6559.49	1112405888	74	59	10100.9	1607864448	9.23199	1689721	D02	2	0.551402	wt	starvation
44481	D02	3	16584	31	5608.62	925343680	82	55	9777.52	1559529344	8.38923	1378854	D02	3	0.486726	wt	starvation
44481	D02	4	16584	25	3853.98	618984128	82	47	9610.35	1485724160	6.29512	1186175	D02	4	0.439252	wt	starvation
44481	D02	5	16584	8	927.195	149980464	106	15	12245.2	1917100288	1.99196	403001	D02	5	0.131579	wt	starvation
44481	D02	6	16584	20	4429.18	731409920	90	38	11669.3	1838724096	6.39727	1203978	D02	6	0.345455	wt	starvation
44481	D02	7	16584	24	4147.81	676343680	79	46	10185.7	1595059840	7.07403	1242993	D02	7	0.446602	wt	starvation
44481	D02	8	16584	33	4912.39	785121408	78	61	10016.8	1577435776	10.1258	1830618	D02	8	0.54955	wt	starvation
44481	D02	9	16584	23	3382.94	549184576	94	45	11522.9	1802345728	5.46513	979630	D02	9	0.384615	wt	starvation
44481	D03	1	16584	31	4574.34	757248128	83	56	11096.4	1766574208	8.52969	1565363	D03	1	0.491228	wt	starvation
44481	D03	2	16584	21	3811.25	624676160	75	54	9382.87	1474512768	7.8274	1513515	D03	2	0.5625	wt	starvation
44481	D03	3	16584	21	3159.28	529339136	92	51	12752.8	2039448320	8.07001	1505598	D03	3	0.451327	wt	starvation
44481	D03	4	16584	34	5808.53	958749888	69	70	8856.69	1372963072	12.9605	2419661	D03	4	0.679612	wt	starvation
44481	D03	5	16584	34	5428.93	880535232	78	71	10170.5	1615947520	10.611	2027491	D03	5	0.633929	wt	starvation
44481	D03	6	16584	23	3770.52	621053824	83	43	10289.7	1605112960	6.49942	1196300	D03	6	0.40566	wt	starvation
44481	D03	7	16584	33	6195.76	1007431616	83	77	9728.64	1520535936	15.9485	2885603	D03	7	0.663793	wt	starvation
44481	D03	8	16584	23	5150.39	838074944	83	35	10246.6	1601543424	3.9967	780517	D03	8	0.330189	wt	starvation
44481	D03	9	16584	26	4958.46	804811200	80	53	10903.4	1711543808	10.2407	1893465	D03	9	0.5	wt	starvation
44481	D04	1	16584	42	8524.11	1409124096	54	83	7535.89	1211374208	15.8974	2600818	D04	1	0.864583	wt	starvation
44481	D04	2	16584	16	2679.15	432627936	92	29	13025.8	2086992384	3.37102	622486	D04	2	0.268519	wt	starvation
44481	D04	3	16584	22	4555.8	748151296	82	43	10406.2	1629412864	5.60559	941173	D04	3	0.413462	wt	starvation
44481	D04	4	16584	17	3254.89	529237632	93	36	11657.8	1831914240	5.33744	1015866	D04	4	0.327273	wt	starvation
44481	D04	5	16584	16	3924.97	640703680	71	30	9957.61	1571212416	5.58005	1024706	D04	5	0.344828	wt	starvation
44481	D04	6	16584	12	2554.85	419303328	93	42	12051.9	1888245504	5.74605	1042645	D04	6	0.4	wt	starvation
44481	D04	7	16584	21	3131.39	506837856	83	57	11413.4	1830227456	9.3086	1649091	D04	7	0.548077	wt	starvation
44481	D04	8	16584	27	4734.86	753804672	79	49	9124.97	1416583424	8.7723	1665249	D04	8	0.462264	wt	starvation
44481	D04	9	16584	21	3852.2	622996352	71	43	10798.7	1704247424	6.09081	1037428	D04	9	0.467391	wt	starvation
44481	D05	1	16584	46	9536.48	1656444544	65	87	8940.64	1451335552	17.3914	3229431	D05	1	0.783784	trafE KO	control
44481	D05	2	16584	14	2221.15	373509504	133	38	13886.4	2312596736	8.1977	1541313	D05	2	0.258503	trafE KO	control
44481	D05	3	16584	47	8425.7	1459313024	65	91	8779.01	1405987328	15.7442	2543604	D05	3	0.8125	trafE KO	control
44481	D05	4	16584	43	9573.75	1652441984	67	86	8809.89	1462626176	17.0849	3121370	D05	4	0.781818	trafE KO	control
44481	D05	5	16584	18	4292.91	730095232	92	43	12839.2	2104201984	5.95035	1153859	D05	5	0.390909	trafE KO	control
44481	D05	6	16584	41	9437.82	1647541120	64	87	7982.72	1277194624	10.9941	1893405	D05	6	0.828571	trafE KO	control
44481	D05	7	16584	47	10507.4	1788879872	48	99	7588.76	1225096704	17.4169	3026774	D05	7	1.04211	trafE KO	control
44481	D05	8	16584	48	9899.82	1746189696	67	87	9453.92	1541261824	16.5103	3158691	D05	8	0.756522	trafE KO	control
44481	D05	9	16584	32	7503.5	1293547776	69	70	11142.2	1853400320	10.5344	1762435	D05	9	0.693069	trafE KO	control
44481	D06	1	16584	41	10579.7	1860902400	63	107	8555.91	1400188800	15.9868	2872858	D06	1	1.02885	trafE KO	control
44481	D06	2	16584	38	8899.76	1549053440	64	81	9324.75	1542609408	14.3907	2670787	D06	2	0.794118	trafE KO	control
44481	D06	3	16584	45	10077.1	1769669248	66	74	9236.89	1538126720	14.5439	2495644	D06	3	0.666667	trafE KO	control
44481	D06	4	16584	37	9803.27	1712566784	64	73	8934.93	1475904256	10.4323	1979578	D06	4	0.722772	trafE KO	control
44481	D06	5	16584	46	12081.1	2117461248	57	96	7546.24	1247438592	14.0204	2667365	D06	5	0.932039	trafE KO	control
44481	D06	6	16584	39	8525.03	1505069952	65	64	9753.87	1594099840	10.9686	1926891	D06	6	0.615385	trafE KO	control
44481	D06	7	16584	37	8652.53	1520393600	77	78	9862.72	1609118592	14.9397	2677591	D06	7	0.684211	trafE KO	control
44481	D06	8	16584	39	9017.48	1530738816	52	76	7410.58	1223097472	11.7602	2256889	D06	8	0.835165	trafE KO	control
44481	D06	9	16584	34	7092.02	1228144256	74	68	11373.1	1877251456	10.3557	1872785	D06	9	0.62963	trafE KO	control
44481	D07	1	16584	31	6348.71	1085158400	77	58	10748.6	1754900608	9.61506	1871814	D07	1	0.537037	trafE KO	control
44481	D07	2	16584	30	6266.08	1076927616	86	53	12631.4	2117906816	9.00215	1700964	D07	2	0.456897	trafE KO	control
44481	D07	3	16584	29	7832.73	1340690432	71	64	9201.46	1498676608	10.7387	1852848	D07	3	0.64	trafE KO	control
44481	D07	4	16584	42	9371.79	1597761664	60	84	8265.45	1366352640	12.7179	2430106	D07	4	0.823529	trafE KO	control
44481	D07	5	16584	28	5809.65	999632064	76	44	11709.6	1957839744	6.81865	1365906	D07	5	0.423077	trafE KO	control
44481	D07	6	16584	28	7872.15	1333345024	70	64	9928.27	1626386176	9.07876	1667549	D07	6	0.653061	trafE KO	control
44481	D07	7	16584	23	4201.18	708804672	69	32	11004.6	1779736576	4.201	853765	D07	7	0.347826	trafE KO	control
44481	D07	8	16584	35	8974.09	1560132224	66	66	9597.24	1584153984	12.6924	2398333	D07	8	0.653465	trafE KO	control
44481	D07	9	16584	41	8663.43	1504285312	63	66	9176.67	1476839936	10.3812	1801509	D07	9	0.634615	trafE KO	control
44481	E02	1	16584	4	1516.78	154512368	71	12	12970.5	1337615360	1.58336	307895	E02	1	0.16	wt	control
44481	E02	2	16584	16	3562.84	380126368	70	45	11156.7	1136372096	6.19297	1180081	E02	2	0.523256	wt	control
44481	E02	3	16584	10	2081.44	219887440	76	30	12698	1296339712	4.25208	746768	E02	3	0.348837	wt	control
44481	E02	4	16584	13	2943.02	307025440	70	26	11432.2	1162127488	2.9241	528836	E02	4	0.313253	wt	control
44481	E02	5	16584	12	3089.43	335113312	76	29	11964.3	1246666880	4.35423	786694	E02	5	0.329545	wt	control
44481	E02	6	16584	13	1963.2	197960832	76	21	13265.9	1353291008	2.70703	444877	E02	6	0.235955	wt	control
44481	E02	7	16584	9	1919.24	198224464	75	18	12165.8	1248655488	3.00072	585032	E02	7	0.214286	wt	control
44481	E02	8	16584	9	2029.15	212107808	80	19	12679.5	1300968960	5.55452	1031957	E02	8	0.213483	wt	control
44481	E02	9	16584	6	980.71	100392000	77	12	12811.4	1338542720	2.09412	403646	E02	9	0.144578	wt	control
44481	E03	1	16584	14	2160.6	223749328	79	27	12093.9	1198472576	5.72051	1075521	E03	1	0.290323	wt	control
44481	E03	2	16584	7	2251.34	239023904	66	15	12570.5	1310817792	2.1835	408460	E03	2	0.205479	wt	control
44481	E03	3	16584	9	1528.55	155255712	79	18	13599	1403952256	2.87303	544169	E03	3	0.204545	wt	control
44481	E03	4	16584	7	1336.66	131525832	66	21	12858.2	1311464192	4.78838	928286	E03	4	0.287671	wt	control
44481	E03	5	16584	12	3371.78	357237184	73	27	11894.2	1212660352	4.50746	859865	E03	5	0.317647	wt	control
44481	E03	6	16584	4	777.287	78589624	72	10	13928.1	1431830400	2.47719	421890	E03	6	0.131579	wt	control
44481	E03	7	16584	11	1947.53	195851984	71	18	12745.9	1298439296	2.51549	413218	E03	7	0.219512	wt	control
44481	E03	8	16584	10	2327.1	239319856	64	18	12660.7	1267884416	3.01348	673834	E03	8	0.243243	wt	control
44481	E03	9	16584	9	1793.92	184063968	69	24	12628.8	1324190848	3.72855	662438	E03	9	0.307692	wt	control
44481	E04	1	16584	5	1123.57	110617840	79	9	13242.6	1345546880	1.46843	270190	E04	1	0.107143	wt	control
44481	E04	2	16584	10	2577.15	279084928	76	22	12845.1	1344583552	4.58407	886960	E04	2	0.255814	wt	control
44481	E04	3	16584	6	1966.92	202034112	65	22	12252.2	1255383168	2.74533	456417	E04	3	0.309859	wt	control
44481	E04	4	16584	12	2756.84	280469312	68	25	11580.2	1169186048	4.02224	723219	E04	4	0.3125	wt	control
44481	E04	5	16584	7	1912.92	212366624	69	19	12209.5	1221899648	2.06858	374814	E04	5	0.25	wt	control
44481	E04	6	16584	8	1572	159893344	66	10	11597.6	1165256448	2.86026	521374	E04	6	0.135135	wt	control
44481	E04	7	16584	7	1214.65	115170768	71	9	12776.9	1287620480	2.09412	368388	E04	7	0.115385	wt	control
44481	E04	8	16584	11	2512.26	265408800	73	27	12159.6	1249943808	4.29038	772259	E04	8	0.321429	wt	control
44481	E04	9	16584	7	1080.45	109231200	75	15	14081	1443479552	3.34548	549883	E04	9	0.182927	wt	control
44481	E05	1	16584	24	7007.96	859702208	53	72	9751.53	1068541056	12.5264	2202620	E05	1	0.935065	trafE KO	starvation
44481	E05	2	16584	23	7652.81	968042176	54	81	9646.98	1084938112	14.5822	2776652	E05	2	1.05195	trafE KO	starvation
44481	E05	3	16584	30	8243.1	982541248	47	97	9240.89	1073968128	17.7106	3091392	E05	3	1.25974	trafE KO	starvation
44481	E05	4	16584	25	7272.52	885771072	47	82	9500.34	1040714048	13.2159	2607097	E05	4	1.13889	trafE KO	starvation
44481	E05	5	16584	25	7365.24	896007552	50	83	9413.29	1027158784	14.5694	3030050	E05	5	1.10667	trafE KO	starvation
44481	E05	6	16584	23	7731.58	923851136	47	61	8018.23	883313088	9.19368	1632785	E05	6	0.871429	trafE KO	starvation
44481	E05	7	16584	27	7973.79	957209920	53	81	8882.1	963772992	12.6541	2382563	E05	7	1.0125	trafE KO	starvation
44481	E05	8	16584	25	6204.99	745226816	55	62	10577.6	1149972864	9.09153	1774426	E05	8	0.775	trafE KO	starvation
44481	E05	9	16584	21	6255.64	742916544	52	65	9477.69	1015323904	12.1816	2035546	E05	9	0.890411	trafE KO	starvation
44481	E06	1	16584	20	6200.7	758333312	54	47	10473.8	1136082304	6.89526	1273804	E06	1	0.635135	trafE KO	starvation
44481	E06	2	16584	22	7418.67	896592896	54	66	9571.05	1062693504	10.3174	1916800	E06	2	0.868421	trafE KO	starvation
44481	E06	3	16584	23	7891.82	923879744	52	61	8041.43	858423360	9.00215	1483775	E06	3	0.813333	trafE KO	starvation
44481	E06	4	16584	26	9428.91	1166414080	42	96	7090.22	752485120	16.3443	3183302	E06	4	1.41176	trafE KO	starvation
44481	E06	5	16584	23	8105.84	943360128	41	61	7894.54	851451712	8.24877	1624720	E06	5	0.953125	trafE KO	starvation
44481	E06	6	16584	26	7539.37	909465280	62	92	9623.88	1041477248	19.4472	3646105	E06	6	1.04545	trafE KO	starvation
44481	E06	7	16584	27	7766.45	909518144	53	58	8413.54	898601344	9.53844	1591325	E06	7	0.725	trafE KO	starvation
44481	E06	8	16584	17	5713.39	679583296	55	67	10363.5	1088765696	10.4706	2088604	E06	8	0.930556	trafE KO	starvation
44481	E06	9	16584	21	5001.67	592208192	57	55	10032	1096727936	7.03572	1224549	E06	9	0.705128	trafE KO	starvation
44481	E07	1	16584	21	6405.19	833080320	63	81	10842.6	1197704064	25.8955	4138650	E07	1	0.964286	trafE KO	starvation
44481	E07	2	16584	21	6579.85	812375936	58	50	10574.1	1182257920	9.98536	1965811	E07	2	0.632911	trafE KO	starvation
44481	E07	3	16584	17	4365.47	527569376	61	49	12803.7	1472245888	7.46987	1329127	E07	3	0.628205	trafE KO	starvation
44481	E07	4	16584	23	5986.27	707425408	59	57	11017.7	1226341504	8.09555	1575920	E07	4	0.695122	trafE KO	starvation
44481	E07	5	16584	25	6581.7	805840704	54	73	10033.5	1122685440	11.2367	2181146	E07	5	0.924051	trafE KO	starvation
44481	E07	6	16584	25	6140.41	695734912	43	52	9458.29	1015007808	7.94232	1370979	E07	6	0.764706	trafE KO	starvation
44481	E07	7	16584	22	5817.45	691589376	54	79	9942.12	1102529024	9.97259	1961947	E07	7	1.03947	trafE KO	starvation
44481	E07	8	16584	19	5066.42	593689024	51	41	10117.5	1118634368	5.8482	1112529	E07	8	0.585714	trafE KO	starvation
44481	E07	9	16584	20	6793.03	763669312	44	41	7866.64	841638208	6.74203	1314173	E07	9	0.640625	trafE KO	starvation
