# Supplementary material for: A TRAF-like E3 ubiquitin ligase TrafE coordinates ESCRT and autophagy in endolysosomal damage response and cell-autonomous immunity to Mycobacterium marinum
Source: eLife. 2023 Apr 18;12:e85727. doi: 10.7554/eLife.85727 (PMC10181826; doi:10.7554/eLife.85727)
Supplement: Figure 10—figure supplement 1—source data 4. [file elife-85727-fig10-figsupp1-data4.xlsx]

## Sheet: VPS32 pipeline
Plate ID	Well Name	Site ID	MEASUREMENT SET ID	Cell: Dicty FITC_Features Count_Sum (Lyudmil)	Cell: Dicty with dot_FITC_Area_Sum (Lyudmil)	Cell: Dicty with dot_FITC_Integrated Intensity_Sum (Lyudmil)	Cell: Dicty no dot_FITC_Features Count_Sum (Lyudmil)	Cell: dot_FITC_Features Count_Sum (Lyudmil)	Cell: Dicty no dot_FITC_Area_Sum (Lyudmil)	Cell: Dicty no dot_FITC_Integrated Intensity_Sum (Lyudmil)	Cell: dot_FITC_Area_Sum (Lyudmil)	Cell: dot_FITC_Integrated Intensity_Sum (Lyudmil)	average nb of structures	Well Name	Condition	Strain
44481	B02	1	16584	50	12940.1	2599152896	29	259	3850.12	662242624	55.1238	10095446	5.18	B02	Control	wt
44481	B02	2	16584	62	13627.4	2658842368	40	339	5195.09	922333248	86.3057	16157452	5.46774	B02	Control	wt
44481	B02	3	16584	47	13089.7	2570860032	31	254	4689.1	811401280	56.6433	10321348	5.40426	B02	Control	wt
44481	B02	4	16584	43	12825.8	2520621312	34	264	4658.09	815429056	82.4622	15476158	6.13953	B02	Control	wt
44481	B02	5	16584	52	7844.21	1529885056	64	155	7839.14	1477038976	39.2008	7940418	2.98077	B02	Control	wt
44481	B02	6	16584	64	15543.9	3062862848	32	302	4494.97	773688192	64.7899	12074054	4.71875	B02	Control	wt
44481	B02	7	16584	65	14754.1	2911363328	33	297	4966.71	869506688	58.0479	10599542	4.56923	B02	Control	wt
44481	B02	8	16584	62	14387.8	2796235264	45	304	5406.94	943488128	72.9365	14016594	4.90323	B02	Control	wt
44481	B02	9	16584	80	18791.3	3777343488	26	383	3123.69	572479296	85.3863	15733843	4.7875	B02	Control	wt
44481	B03	1	16584	63	13603.9	2607326976	30	295	3856.31	674524928	60.5634	11026554	4.68254	B03	Control	wt
44481	B03	2	16584	56	11832.1	2213085184	34	238	4887.14	826834560	52.3018	10070912	4.25	B03	Control	wt
44481	B03	3	16584	62	14226.6	2743184640	41	309	5912.51	1050258688	85.846	15375077	4.98387	B03	Control	wt
44481	B03	4	16584	54	13535.7	2627100928	24	283	3505.9	593794880	66.003	12516600	5.24074	B03	Control	wt
44481	B03	5	16584	56	13310.3	2614713600	43	291	6116.45	1098406912	60.0526	12147397	5.19643	B03	Control	wt
44481	B03	6	16584	51	16153.1	3219687424	34	414	3847.99	674109504	105.855	19222136	8.11765	B03	Control	wt
44481	B03	7	16584	56	14141.7	2765232128	38	365	4555.46	778096448	91.0813	16623778	6.51786	B03	Control	wt
44481	B03	8	16584	66	16828.9	3459469312	28	399	3689.28	632875200	86.4078	16241061	6.04545	B03	Control	wt
44481	B03	9	16584	71	15968.5	3129627136	38	392	4128.4	716983232	106.902	19943396	5.52113	B03	Control	wt
44481	B04	1	16584	61	13858.9	2644740096	36	332	4625.72	839946048	68.4418	12242941	5.44262	B04	Control	wt
44481	B04	2	16584	45	12923.8	2519026432	32	223	4700.09	792994688	39.8521	7261313	4.95556	B04	Control	wt
44481	B04	3	16584	60	13196	2548311040	26	370	4118.82	741429568	87.0207	15229274	6.16667	B04	Control	wt
44481	B04	4	16584	57	15592.8	3060232192	26	295	3227.29	571282944	52.1741	9861920	5.17544	B04	Control	wt
44481	B04	5	16584	55	11653	2204842240	41	219	5572.17	979324992	32.1268	6216330	3.98182	B04	Control	wt
44481	B04	6	16584	41	11812.8	2305628160	40	276	4887.99	822756736	52.7998	9713935	6.73171	B04	Control	wt
44481	B04	7	16584	61	15033.9	2963627008	36	304	4259.09	737503232	67.8162	11978377	4.98361	B04	Control	wt
44481	B04	8	16584	62	16612.4	3261241600	27	386	3483.47	585281472	88.6807	16377814	6.22581	B04	Control	wt
44481	B04	9	16584	60	15127	2982552576	34	267	4872.79	865197056	59.5546	10730454	4.45	B04	Control	wt
44481	B05	1	16584	55	11369.1	1935079680	33	214	4615.35	743776256	46.0961	8334718	3.89091	B05	Control	trafE KO
44481	B05	2	16584	58	13054.9	2281333760	23	321	3094.66	484557440	84.7479	15400131	5.53448	B05	Control	trafE KO
44481	B05	3	16584	60	13618.8	2421486336	35	270	5116.56	833731264	59.3503	10429919	4.5	B05	Control	trafE KO
44481	B05	4	16584	55	11572.8	1952015488	41	222	4873.94	768672128	42.4186	8178811	4.03636	B05	Control	trafE KO
44481	B05	5	16584	54	12174	2087037824	37	209	5120.64	841882624	42.7123	8246364	3.87037	B05	Control	trafE KO
44481	B05	6	16584	58	14406.6	2494189312	28	247	3951.32	631880640	55.3153	10182606	4.25862	B05	Control	trafE KO
44481	B05	7	16584	63	14608.7	2533725952	31	350	3464.03	553019392	101.514	18724554	5.55556	B05	Control	trafE KO
44481	B05	8	16584	60	13915.5	2398098176	38	354	4379.91	709004160	85.0926	16131445	5.9	B05	Control	trafE KO
44481	B05	9	16584	60	16268.9	2874473216	34	292	3877.2	614274112	54.8939	9757178	4.86667	B05	Control	trafE KO
44481	B06	1	16584	60	13503.8	2350925056	41	274	5096.49	825956608	57.3456	10361460	4.56667	B06	Control	trafE KO
44481	B06	2	16584	59	13553.4	2375047168	34	217	3878.11	614666240	45.2789	8318455	3.67797	B06	Control	trafE KO
44481	B06	3	16584	53	11972.8	2104191104	44	222	6751.02	1083082496	62.6192	10840098	4.18868	B06	Control	trafE KO
44481	B06	4	16584	56	12035.9	2077266176	41	262	5799.69	918544128	70.3955	13425109	4.67857	B06	Control	trafE KO
44481	B06	5	16584	72	15590.3	2707447040	27	269	3497.84	561763328	47.6794	9090198	3.73611	B06	Control	trafE KO
44481	B06	6	16584	65	15859.3	2789767680	26	248	3718.72	611230336	49.8246	8991165	3.81538	B06	Control	trafE KO
44481	B06	7	16584	50	15574.1	2789800448	36	272	4558.46	708974336	50.0289	9077862	5.44	B06	Control	trafE KO
44481	B06	8	16584	67	15245.4	2741482496	30	336	4034.97	645570432	58.0862	10928610	5.01493	B06	Control	trafE KO
44481	B06	9	16584	64	15752.7	2760536064	32	392	3644.95	592515136	108.026	18911694	6.125	B06	Control	trafE KO
44481	B07	1	16584	46	12061.7	2116459520	41	229	4780.79	763609408	46.3642	8165296	4.97826	B07	Control	trafE KO
44481	B07	2	16584	55	11424.5	1943729536	36	232	4758.19	738848640	58.3288	11114027	4.21818	B07	Control	trafE KO
44481	B07	3	16584	65	13623.5	2334467328	27	296	2965.04	466368928	75.7968	13503996	4.55385	B07	Control	trafE KO
44481	B07	4	16584	57	13124.1	2313422592	42	269	4928.34	779467456	50.1183	9490999	4.7193	B07	Control	trafE KO
44481	B07	5	16584	65	15437.9	2764211712	33	413	4501.11	755155520	97.0572	18693438	6.35385	B07	Control	trafE KO
44481	B07	6	16584	56	13007	2287526400	31	271	3659.23	557977792	77.1631	14112722	4.83929	B07	Control	trafE KO
44481	B07	7	16584	66	15168.1	2691073024	34	402	4427.91	718951872	97.0189	17262012	6.09091	B07	Control	trafE KO
44481	B07	8	16584	65	15672.1	2752855552	18	340	2150.01	340139232	68.4929	12988279	5.23077	B07	Control	trafE KO
44481	B07	9	16584	47	14157.8	2445527296	35	167	4266.2	677647040	30.1604	5390421	3.55319	B07	Control	trafE KO
44481	C02	1	16584	59	13990.9	1896760832	19	639	2650.26	290242592	165.001	31677564	10.8305	C02	Starvation	wt
44481	C02	2	16584	69	17095.2	2389989632	9	843	1654.02	200015392	220.086	44794224	12.2174	C02	Starvation	wt
44481	C02	3	16584	63	15530.5	2120512384	23	714	2394.85	265643952	187.934	35629356	11.3333	C02	Starvation	wt
44481	C02	4	16584	59	15540.6	2127802496	19	617	2092	222235664	154.85	30801926	10.4576	C02	Starvation	wt
44481	C02	5	16584	66	15839.2	2229970432	15	769	1596.21	177180400	233.532	47478596	11.6515	C02	Starvation	wt
44481	C02	6	16584	68	17676.1	2483555328	15	768	1905.13	210613024	195.046	39087152	11.2941	C02	Starvation	wt
44481	C02	7	16584	74	17000	2307557120	16	682	1973.05	225721280	194.012	38366164	9.21622	C02	Starvation	wt
44481	C02	8	16584	71	16941.8	2336435712	19	679	1922.37	224213808	169.777	33685744	9.56338	C02	Starvation	wt
44481	C02	9	16584	69	18748.4	2709425920	17	984	1785.39	199789792	276.5	53789792	14.2609	C02	Starvation	wt
44481	C03	1	16584	60	13882.8	1845180672	19	486	2555.17	277643104	117.436	22208880	8.1	C03	Starvation	wt
44481	C03	2	16584	61	16943.5	2377252352	14	699	1801.73	203065104	184.384	34707280	11.459	C03	Starvation	wt
44481	C03	3	16584	75	18742.3	2600248320	11	764	959.348	110102384	195.455	34588880	10.1867	C03	Starvation	wt
44481	C03	4	16584	67	18197.3	2591382016	20	794	1958.47	215290096	186.019	35887956	11.8507	C03	Starvation	wt
44481	C03	5	16584	67	17548.6	2464095488	18	776	2200.15	259349328	193.45	38449608	11.5821	C03	Starvation	wt
44481	C03	6	16584	66	17394.3	2425177600	18	747	2199.83	254129072	187.232	33549108	11.3182	C03	Starvation	wt
44481	C03	7	16584	60	16483.4	2272320000	11	714	840.43	91621640	180.183	33653744	11.9	C03	Starvation	wt
44481	C03	8	16584	67	17744.9	2485012992	20	767	1877.71	220211312	194.191	36686692	11.4478	C03	Starvation	wt
44481	C03	9	16584	82	18571.1	2589146880	14	782	1544.36	180812512	208.428	37457136	9.53659	C03	Starvation	wt
44481	C04	1	16584	69	15859	2158682624	19	652	2098.97	229992832	162.32	30444798	9.44928	C04	Starvation	wt
44481	C04	2	16584	63	16096.7	2161540864	13	638	1958.79	225739248	154.16	29264400	10.127	C04	Starvation	wt
44481	C04	3	16584	64	17623.6	2453062144	16	776	1827.19	203127392	195.736	33247194	12.125	C04	Starvation	wt
44481	C04	4	16584	67	17925.9	2448677120	13	707	1765.28	204012640	164.145	31999202	10.5522	C04	Starvation	wt
44481	C04	5	16584	60	16522.4	2262902784	17	686	1502.38	159806144	185.674	36510688	11.4333	C04	Starvation	wt
44481	C04	6	16584	76	18787	2608103680	14	923	1410.2	152536272	230.876	42832964	12.1447	C04	Starvation	wt
44481	C04	7	16584	66	16320.4	2194025984	22	589	2170.74	241210000	145.899	26104792	8.92424	C04	Starvation	wt
44481	C04	8	16584	65	17437.2	2388775168	19	638	2008.13	225188176	144.124	26266968	9.81538	C04	Starvation	wt
44481	C04	9	16584	72	17533.9	2401129728	21	672	2390.93	269188544	158.808	28994752	9.33333	C04	Starvation	wt
44481	C05	1	16584	52	13510.3	1573937920	25	260	3049.2	315498016	43.9892	8119289	5	C05	Starvation	trafE KO
44481	C05	2	16584	42	11710.1	1348165504	25	191	3383.68	344145440	39.0093	7274344	4.54762	C05	Starvation	trafE KO
44481	C05	3	16584	49	12334.8	1391096192	19	230	2987.46	311046336	46.1982	8373043	4.69388	C05	Starvation	trafE KO
44481	C05	4	16584	52	11737.8	1316338432	23	212	3385.92	346101440	33.8123	6662905	4.07692	C05	Starvation	trafE KO
44481	C05	5	16584	55	15380	1796401024	18	280	2138.19	225346704	61.6487	12858899	5.09091	C05	Starvation	trafE KO
44481	C05	6	16584	43	12451.2	1426413696	27	221	4355.42	441264000	43.9637	7960125	5.13953	C05	Starvation	trafE KO
44481	C05	7	16584	49	14302	1630597504	21	248	2579.15	264992336	49.4288	9180832	5.06122	C05	Starvation	trafE KO
44481	C05	8	16584	57	14340	1645369344	21	221	2717.22	270950624	34.0294	6755170	3.87719	C05	Starvation	trafE KO
44481	C05	9	16584	42	11581.3	1306327168	23	222	2810.24	277015872	40.2607	7349697	5.28571	C05	Starvation	trafE KO
44481	C06	1	16584	43	12415.2	1415245440	14	215	1957.45	195328256	44.7298	7828375	5	C06	Starvation	trafE KO
44481	C06	2	16584	41	12620.5	1437463936	24	220	3712.89	383598112	33.4165	5951060	5.36585	C06	Starvation	trafE KO
44481	C06	3	16584	35	8773.81	976815168	39	126	5704.03	577686080	27.8364	4760409	3.6	C06	Starvation	trafE KO
44481	C06	4	16584	48	14178.8	1634593280	27	263	3172.99	330163520	43.4657	8195064	5.47917	C06	Starvation	trafE KO
44481	C06	5	16584	43	11837.4	1375154048	24	195	3627.29	392541280	31.5394	5948500	4.53488	C06	Starvation	trafE KO
44481	C06	6	16584	45	11983.9	1383512448	23	197	3434.77	351214272	36.2129	6185773	4.37778	C06	Starvation	trafE KO
44481	C06	7	16584	51	13312.2	1537541888	23	223	3084.94	312313824	46.8112	8297397	4.37255	C06	Starvation	trafE KO
44481	C06	8	16584	51	12980	1472088576	16	218	2876.7	298757472	37.1323	6960895	4.27451	C06	Starvation	trafE KO
44481	C06	9	16584	50	13582.5	1532931584	21	188	3079.51	320354848	31.9991	5625719	3.76	C06	Starvation	trafE KO
44481	C07	1	16584	55	13367.6	1517203200	24	203	3168.69	324470752	41.6525	7247194	3.69091	C07	Starvation	trafE KO
44481	C07	2	16584	50	14152.2	1606529280	24	210	3244.74	345129216	30.9648	5449263	4.2	C07	Starvation	trafE KO
44481	C07	3	16584	35	9202.63	1052179648	36	143	4693.63	484703040	19.9324	3400235	4.08571	C07	Starvation	trafE KO
44481	C07	4	16584	47	14253.1	1624845824	20	189	2814.66	292151808	30.6073	5429880	4.02128	C07	Starvation	trafE KO
44481	C07	5	16584	35	9345.07	1086540544	28	169	4830.3	502902272	37.2216	7138781	4.82857	C07	Starvation	trafE KO
44481	C07	6	16584	41	9070.2	1002819392	24	129	4210.37	434230176	25.7678	4751272	3.14634	C07	Starvation	trafE KO
44481	C07	7	16584	53	12642.6	1427491072	20	272	2402.83	239825952	42.4442	7996741	5.13208	C07	Starvation	trafE KO
44481	C07	8	16584	46	11679.9	1305270400	19	194	2695.77	263114720	39.303	7537208	4.21739	C07	Starvation	trafE KO
44481	C07	9	16584	33	8077.85	897546816	27	119	4734.39	488502400	19.5493	3499148	3.60606	C07	Starvation	trafE KO
