# Supplementary material for: A TRAF-like E3 ubiquitin ligase TrafE coordinates ESCRT and autophagy in endolysosomal damage response and cell-autonomous immunity to Mycobacterium marinum
Source: eLife. 2023 Apr 18;12:e85727. doi: 10.7554/eLife.85727 (PMC10181826; doi:10.7554/eLife.85727)
Supplement: Figure 10—source data 1. [file elife-85727-fig10-data1.xlsx]

## Sheet: 2022.12.07_segmentation_ALIX
Plate ID	Well Name	Site ID	MEASUREMENT SET ID	Cell: All Dicty_FITC_Features Count_Sum (Lyudmil)	Cell: Alix dot dicty_Features Count_Sum (Lyudmil)	Cell: Alix big dots_Features Count_Sum (Lyudmil)	Cell: Alix dots_Area_Average (Lyudmil)	Cell: Alix dots_Area_Sum (Lyudmil)	Cell: Alix dots_Features Count_Sum (Lyudmil)	Cell: Alix big dots_Area_Average (Lyudmil)	Cell: Alix big dots_Area_Sum (Lyudmil)	Cell: Alix big dots_Features Count_Sum_1 (Lyudmil)	Strain	norma_dot_count	average nb of structures
54604	B08	2	17398	42	16	0	0.173294	3.63917	21			0	wt	1.3125	0.5
54604	B08	1	17398	28	5	0	0.195791	1.17475	6			0	wt	1.2	0.214286
54604	B10	1	17398	26	8	0	0.192954	1.73658	9			0	wt	1.125	0.346154
54604	B10	2	17398	29	7	0	0.175574	1.40459	8			0	wt	1.14286	0.275862
54604	C08	2	17398	23	14	1	0.195366	3.90731	20	2.02389	4.04777	2	trafE KO	1.46667	0.956522
54604	C08	1	17398	21	8	0	0.140459	1.54505	11			0	trafE KO	1.375	0.52381
54604	C10	1	17398	23	17	1	0.190374	4.18823	22	0.842754	0.842754	1	trafE KO	1.27778	1
54604	C10	2	17398	29	16	1	0.191044	4.96714	26	1.30244	1.30244	1	trafE KO	1.58824	0.931034
54604	F09	2	17398	19	9	0	0.17501	2.97518	17			0	trafE KO	1.88889	0.894737
54604	F09	1	17398	10	3	0	0.140459	0.421377	3			0	trafE KO	1	0.3
54604	G09	2	17398	19	6	0	0.138635	0.970444	7			0	wt	1.16667	0.368421
54604	G09	1	17398	20	6	0	0.148972	0.89383	6			0	wt	1	0.3
54606	B08	1	17399	40	21	0	0.181604	6.53773	36			0	wt	1.71429	0.9
54606	B08	1	17399	42	22	0	0.220356	7.71248	35			0	wt	1.59091	0.833333
54606	B08	1	17399	42	17	0	0.211656	6.98464	33			0	wt	1.94118	0.785714
54606	B08	1	17399	40	17	0	0.21223	6.15466	29			0	wt	1.70588	0.725
54606	B08	1	17399	37	17	0	0.206432	6.19297	30			0	wt	1.76471	0.810811
54606	B08	1	17399	37	11	0	0.214852	4.9416	23			0	wt	2.09091	0.621622
54606	B08	1	17399	39	17	0	0.24129	6.99741	29			0	wt	1.70588	0.74359
54606	B08	1	17399	40	14	0	0.206196	5.56728	27			0	wt	1.92857	0.675
54606	B08	1	17399	40	15	0	0.192645	4.43084	23			0	wt	1.53333	0.575
54606	B08	1	17399	41	15	0	0.202772	5.06929	25			0	wt	1.66667	0.609756
54606	B08	1	17399	38	13	0	0.182829	4.02224	22			0	wt	1.69231	0.578947
54606	B08	1	17399	40	17	1	0.273873	7.94232	29	0.919368	0.919368	1	wt	1.66667	0.75
54606	B08	1	17399	37	17	0	0.21871	8.52969	39			0	wt	2.29412	1.05405
54606	B08	2	17399	26	8	0	0.175762	2.98795	17			0	wt	2.125	0.653846
54606	B08	2	17399	23	8	0	0.160104	2.08135	13			0	wt	1.625	0.565217
54606	B08	2	17399	23	7	0	0.170253	2.04304	12			0	wt	1.71429	0.521739
54606	B08	2	17399	27	14	0	0.169189	2.70703	16			0	wt	1.14286	0.592593
54606	B08	2	17399	29	9	0	0.165015	2.14519	13			0	wt	1.44444	0.448276
54606	B08	2	17399	28	8	0	0.173658	1.73658	10			0	wt	1.25	0.357143
54606	B08	2	17399	27	10	0	0.135816	1.49397	11			0	wt	1.1	0.407407
54606	B08	2	17399	28	7	0	0.136811	0.957675	7			0	wt	1	0.25
54606	B08	2	17399	30	6	0	0.140459	0.842754	6			0	wt	1	0.2
54606	B08	2	17399	27	8	0	0.162805	1.95366	12			0	wt	1.5	0.444444
54606	B08	2	17399	27	15	0	0.160739	2.73257	17			0	wt	1.13333	0.62963
54606	B08	2	17399	28	10	0	0.142712	2.42611	17			0	wt	1.7	0.607143
54606	B08	2	17399	29	8	0	0.157059	1.57059	10			0	wt	1.25	0.344828
54606	B09	1	17399	81	8	0	0.130882	1.04706	8			0		1	0.0987654
54606	B09	1	17399	75	22	0	0.146311	3.51147	24			0		1.09091	0.32
54606	B09	1	17399	83	16	0	0.158225	3.63917	23			0		1.4375	0.277108
54606	B09	1	17399	78	25	0	0.174377	5.58005	32			0		1.28	0.410256
54606	B09	1	17399	85	40	0	0.169247	9.3086	55			0		1.375	0.647059
54606	B09	1	17399	80	36	0	0.170815	9.05322	53			0		1.47222	0.6625
54606	B09	1	17399	85	43	0	0.176739	11.1346	63			0		1.46512	0.741176
54606	B09	1	17399	77	47	0	0.184151	15.2845	83			0		1.76596	1.07792
54606	B09	1	17399	82	42	0	0.188531	12.8201	68			0		1.61905	0.829268
54606	B09	1	17399	87	49	0	0.197625	12.8456	65			0		1.32653	0.747126
54606	B09	1	17399	83	39	0	0.184837	11.275	61			0		1.5641	0.73494
54606	B09	1	17399	84	41	0	0.174576	11.1729	64			0		1.56098	0.761905
54606	B09	1	17399	81	40	0	0.171337	9.42352	55			0		1.375	0.679012
54606	B09	2	17399	78	15	0	0.126094	2.0175	16			0		1.06667	0.205128
54606	B09	2	17399	89	25	0	0.139138	4.035	29			0		1.16	0.325843
54606	B09	2	17399	92	37	0	0.160652	6.90803	43			0		1.16216	0.467391
54606	B09	2	17399	94	38	0	0.161911	8.09555	50			0		1.31579	0.531915
54606	B09	2	17399	91	45	0	0.189739	12.1433	64			0		1.42222	0.703297
54606	B09	2	17399	95	49	0	0.196884	14.5694	74			0		1.5102	0.778947
54606	B09	2	17399	97	54	0	0.177968	14.2374	80			0		1.48148	0.824742
54606	B09	2	17399	95	56	0	0.193101	20.4687	106			0		1.89286	1.11579
54606	B09	2	17399	97	42	0	0.190737	15.259	80			0		1.90476	0.824742
54606	B09	2	17399	100	45	0	0.194391	14.7737	76			0		1.68889	0.76
54606	B09	2	17399	93	49	0	0.184715	16.2549	88			0		1.79592	0.946237
54606	B09	2	17399	100	43	0	0.192994	13.5096	70			0		1.62791	0.7
54606	B09	2	17399	95	29	0	0.151233	4.83945	32			0		1.10345	0.336842
54606	B10	1	17399	26	12	0	0.190319	3.9967	21			0	wt	1.75	0.807692
54606	B10	1	17399	20	10	0	0.146843	2.93687	20			0	wt	2	1
54606	B10	1	17399	23	11	0	0.203632	3.86901	19			0	wt	1.72727	0.826087
54606	B10	1	17399	26	14	0	0.169645	3.56255	21			0	wt	1.5	0.807692
54606	B10	1	17399	29	15	0	0.201264	4.22654	21			0	wt	1.4	0.724138
54606	B10	1	17399	30	12	0	0.172045	3.26886	19			0	wt	1.58333	0.633333
54606	B10	1	17399	30	10	0	0.160677	1.92812	12			0	wt	1.2	0.4
54606	B10	1	17399	30	5	0	0.146843	0.881061	6			0	wt	1.2	0.2
54606	B10	1	17399	31	13	0	0.151632	2.42611	16			0	wt	1.23077	0.516129
54606	B10	1	17399	33	12	0	0.173978	2.78364	16			0	wt	1.33333	0.484848
54606	B10	1	17399	32	12	0	0.183022	3.2944	18			0	wt	1.5	0.5625
54606	B10	1	17399	29	9	0	0.143297	1.28967	9			0	wt	1	0.310345
54606	B10	1	17399	29	8	0	0.126271	1.13644	9			0	wt	1.125	0.310345
54606	B10	2	17399	24	4	0	0.130244	0.651219	5			0	wt	1.25	0.208333
54606	B10	2	17399	24	14	0	0.178186	3.92008	22			0	wt	1.57143	0.916667
54606	B10	2	17399	29	10	0	0.159613	2.5538	16			0	wt	1.6	0.551724
54606	B10	2	17399	26	12	0	0.146843	2.64318	18			0	wt	1.5	0.692308
54606	B10	2	17399	28	13	0	0.141961	2.41334	17			0	wt	1.30769	0.607143
54606	B10	2	17399	29	10	0	0.15671	1.72382	11			0	wt	1.1	0.37931
54606	B10	2	17399	29	15	0	0.166605	3.49871	21			0	wt	1.4	0.724138
54606	B10	2	17399	28	9	0	0.144715	1.73658	12			0	wt	1.33333	0.428571
54606	B10	2	17399	29	11	0	0.155782	2.33673	15			0	wt	1.36364	0.517241
54606	B10	2	17399	30	18	0	0.149397	2.98795	20			0	wt	1.11111	0.666667
54606	B10	2	17399	30	13	0	0.170253	2.5538	15			0	wt	1.15385	0.5
54606	B10	2	17399	30	9	0	0.165015	2.14519	13			0	wt	1.44444	0.433333
54606	B10	2	17399	30	12	0	0.163443	3.26886	20			0	wt	1.66667	0.666667
54606	C08	1	17399	21	20	1	0.214337	15.0036	70	2.63041	2.63041	1	trafE KO	3.38095	3.38095
54606	C08	1	17399	18	15	0	0.193303	12.5647	65			0	trafE KO	4.33333	3.61111
54606	C08	1	17399	20	15	1	0.227241	12.271	54	0.919368	0.919368	1	trafE KO	3.4375	2.75
54606	C08	1	17399	18	15	0	0.246933	16.0506	65	4.87776	4.87776	1	trafE KO	4.4	3.66667
54606	C08	1	17399	24	17	0	0.221599	17.5063	79			0	trafE KO	4.64706	3.29167
54606	C08	1	17399	23	20	0	0.203715	13.2415	65	0.906599	0.906599	1	trafE KO	3.3	2.86957
54606	C08	1	17399	23	18	0	0.19924	11.5559	58			0	trafE KO	3.22222	2.52174
54606	C08	1	17399	26	20	1	0.190136	13.8799	73	3.63917	3.63917	1	trafE KO	3.52381	2.84615
54606	C08	1	17399	23	20	0	0.191326	11.6709	61	2.66872	5.33744	2	trafE KO	3.15	2.73913
54606	C08	1	17399	21	18	0	0.190356	12.3732	65			0	trafE KO	3.61111	3.09524
54606	C08	1	17399	22	17	0	0.184142	10.4961	57			0	trafE KO	3.35294	2.59091
54606	C08	1	17399	29	23	0	0.189893	13.2925	70			0	trafE KO	3.04348	2.41379
54606	C08	1	17399	21	15	0	0.215249	10.5472	49			0	trafE KO	3.26667	2.33333
54606	C08	2	17399	23	15	0	0.17094	5.29913	31			0	trafE KO	2.06667	1.34783
54606	C08	2	17399	20	15	0	0.196201	10.2024	52			0	trafE KO	3.46667	2.6
54606	C08	2	17399	18	14	0	0.201264	4.22654	21			0	trafE KO	1.5	1.16667
54606	C08	2	17399	20	17	0	0.217499	6.52496	30			0	trafE KO	1.76471	1.5
54606	C08	2	17399	20	13	0	0.190062	4.9416	26			0	trafE KO	2	1.3
54606	C08	2	17399	21	15	0	0.166508	4.16269	25			0	trafE KO	1.66667	1.19048
54606	C08	2	17399	20	15	0	0.188556	5.65667	30			0	trafE KO	2	1.5
54606	C08	2	17399	18	14	0	0.192026	4.99268	26			0	trafE KO	1.85714	1.44444
54606	C08	2	17399	20	15	0	0.171281	4.96714	29			0	trafE KO	1.93333	1.45
54606	C08	2	17399	20	13	0	0.192557	4.81391	25			0	trafE KO	1.92308	1.25
54606	C08	2	17399	20	14	0	0.186215	4.46915	24			0	trafE KO	1.71429	1.2
54606	C08	2	17399	20	16	0	0.194818	6.81865	35			0	trafE KO	2.1875	1.75
54606	C08	2	17399	19	16	0	0.169519	4.91606	29			0	trafE KO	1.8125	1.52632
54606	C09	1	17399	40	2	0	0.133162	0.932137	7			0		3.5	0.175
54606	C09	1	17399	43	6	0	0.131338	0.919368	7			0		1.16667	0.162791
54606	C09	1	17399	46	6	0	0.140459	0.842754	6			0		1	0.130435
54606	C09	1	17399	46	12	0	0.144388	1.87704	13			0		1.08333	0.282609
54606	C09	1	17399	52	9	0	0.177605	1.95366	11			0		1.22222	0.211538
54606	C09	1	17399	51	9	0	0.166979	2.17073	13			0		1.44444	0.254902
54606	C09	1	17399	53	6	0	0.169645	1.18752	7			0		1.16667	0.132075
54606	C09	1	17399	48	10	0	0.130244	1.30244	10			0		1	0.208333
54606	C09	1	17399	50	7	0	0.187988	3.38379	18			0		2.57143	0.36
54606	C09	1	17399	45	6	0	0.161741	1.94089	12			0		2	0.266667
54606	C09	1	17399	43	2	0	0.153228	0.459684	3			0		1.5	0.0697674
54606	C09	1	17399	44	4	0	0.172382	0.689526	4			0		1	0.0909091
54606	C09	1	17399	48	5	0	0.18177	3.0901	17			0		3.4	0.354167
54606	C09	2	17399	48	3	0	0.18132	0.906599	5			0		1.66667	0.104167
54606	C09	2	17399	51	5	0	0.222181	1.1109	5			0		1	0.0980392
54606	C09	2	17399	58	3	0	0.161741	0.485222	3			0		1	0.0517241
54606	C09	2	17399	59	4	0	0.153228	0.612912	4			0		1	0.0677966
54606	C09	2	17399	59	6	0	0.198629	1.78766	9			0		1.5	0.152542
54606	C09	2	17399	69	2	0	0.114921	0.229842	2			0		1	0.0289855
54606	C09	2	17399	66	5	0	0.157484	0.944906	6			0		1.2	0.0909091
54606	C09	2	17399	70	3	0	0.134074	0.804447	6			0		2	0.0857143
54606	C09	2	17399	68	4	0	0.125562	0.753371	6			0		1.5	0.0882353
54606	C09	2	17399	68	5	0	0.191535	2.29842	12			0		2.4	0.176471
54606	C09	2	17399	70	3	0	0.165997	1.32798	8			0		2.66667	0.114286
54606	C09	2	17399	71	7	0	0.174837	2.27288	13			0		1.85714	0.183099
54606	C09	2	17399	44	1	0	0.114921	0.114921	1			0		1	0.0227273
54606	C10	1	17399	22	21	0	0.205137	18.8726	92			0	trafE KO	4.38095	4.18182
54606	C10	1	17399	23	22	0	0.233686	21.7328	93			0	trafE KO	4.22727	4.04348
54606	C10	1	17399	23	21	0	0.25123	20.0984	80			0	trafE KO	3.80952	3.47826
54606	C10	1	17399	23	21	0	0.229142	16.7274	73			0	trafE KO	3.47619	3.17391
54606	C10	1	17399	23	19	0	0.233389	21.005	90			0	trafE KO	4.73684	3.91304
54606	C10	1	17399	23	22	0	0.238063	17.3786	73			0	trafE KO	3.31818	3.17391
54606	C10	1	17399	24	18	1	0.241517	16.9062	70	1.04706	1.04706	1	trafE KO	3.73684	2.95833
54606	C10	1	17399	24	22	0	0.236141	17.7106	75			0	trafE KO	3.40909	3.125
54606	C10	1	17399	23	18	0	0.247855	13.8799	56			0	trafE KO	3.11111	2.43478
54606	C10	1	17399	24	17	0	0.22062	11.9135	54			0	trafE KO	3.17647	2.25
54606	C10	1	17399	25	19	1	0.2144	9.21922	43	1.34075	1.34075	1	trafE KO	2.2	1.76
54606	C10	1	17399	23	17	0	0.211916	11.0196	52			0	trafE KO	3.05882	2.26087
54606	C10	1	17399	23	20	0	0.194675	11.8752	61			0	trafE KO	3.05	2.65217
54606	C10	2	17399	31	23	2	0.222006	29.3049	132	2.4708	4.9416	2	trafE KO	5.36	4.32258
54606	C10	2	17399	26	23	0	0.24548	21.8478	89			0	trafE KO	3.86957	3.42308
54606	C10	2	17399	25	21	0	0.217384	17.8255	82			0	trafE KO	3.90476	3.28
54606	C10	2	17399	27	20	0	0.226568	17.6723	78			0	trafE KO	3.9	2.88889
54606	C10	2	17399	29	25	0	0.207028	15.5271	75			0	trafE KO	3	2.58621
54606	C10	2	17399	27	22	0	0.254183	16.2677	64			0	trafE KO	2.90909	2.37037
54606	C10	2	17399	25	18	0	0.23179	13.6756	59			0	trafE KO	3.27778	2.36
54606	C10	2	17399	25	24	0	0.222981	14.9397	67			0	trafE KO	2.79167	2.68
54606	C10	2	17399	29	24	0	0.216413	12.5519	58			0	trafE KO	2.41667	2
54606	C10	2	17399	30	17	0	0.238591	12.8839	54			0	trafE KO	3.17647	1.8
54606	C10	2	17399	31	24	0	0.186975	10.4706	56			0	trafE KO	2.33333	1.80645
54606	C10	2	17399	29	21	0	0.212593	12.1178	57			0	trafE KO	2.71429	1.96552
54606	C10	2	17399	30	19	0	0.206347	10.3174	50			0	trafE KO	2.63158	1.66667
54606	D08	1	17399	97	97	5	0.211924	13.1393	62	1.73658	1.73658	1	trafE KO	3.70588	0.649485
54606	D08	1	17399	103	103	67	0.226689	18.3618	81			0	trafE KO	5.0625	0.786408
54606	D08	1	17399	109	109	96	0.216541	10.394	48			0	trafE KO	3.2	0.440367
54606	D08	1	17399	112	112	99	0.226469	12.0029	53			0	trafE KO	3.78571	0.473214
54606	D08	1	17399	113	113	85	0.217438	7.61032	35			0	trafE KO	2.5	0.309735
54606	D08	1	17399	106	106	91	0.192696	8.47862	44			0	trafE KO	3.14286	0.415094
54606	D08	1	17399	110	110	65	0.188097	4.89053	26			0	trafE KO	2	0.236364
54606	D08	1	17399	110	110	52	0.180701	5.96312	33			0	trafE KO	2.2	0.3
54606	D08	1	17399	109	109	48	0.180087	5.22252	29			0	trafE KO	2.41667	0.266055
54606	D08	1	17399	104	103	24	0.151562	3.48594	23			0	trafE KO	1.76923	0.221154
54606	D08	1	17399	109	109	19	0.169479	3.72855	22			0	trafE KO	1.83333	0.201835
54606	D08	1	17399	110	110	16	0.187157	6.5505	35			0	trafE KO	1.94444	0.318182
54606	D08	1	17399	105	105	9	0.194523	9.1426	47			0	trafE KO	2.76471	0.447619
54606	D08	2	17399	91	90	7	0.270011	12.9605	48			0	trafE KO	6	0.527473
54606	D08	2	17399	106	106	63	0.181745	5.45236	30	0.740602	0.740602	1	trafE KO	3.1	0.292453
54606	D08	2	17399	100	100	43	0.254219	8.38923	33			0	trafE KO	3.3	0.33
54606	D08	2	17399	109	109	80	0.228285	9.35968	41	0.663988	0.663988	1	trafE KO	3.5	0.385321
54606	D08	2	17399	104	104	70	0.294884	9.43629	32	0.663988	0.663988	1	trafE KO	3	0.317308
54606	D08	2	17399	105	104	55	0.211789	6.14189	29			0	trafE KO	3.22222	0.27619
54606	D08	2	17399	110	109	46	0.194437	4.27761	22			0	trafE KO	3.14286	0.2
54606	D08	2	17399	104	104	72	0.260168	8.32539	32			0	trafE KO	4	0.307692
54606	D08	2	17399	105	104	70	0.258173	8.26154	32			0	trafE KO	2.90909	0.304762
54606	D08	2	17399	110	109	29	0.196264	5.29913	27			0	trafE KO	3	0.245455
54606	D08	2	17399	107	106	21	0.196551	5.50344	28			0	trafE KO	4	0.261682
54606	D08	2	17399	108	108	15	0.194195	4.66068	24			0	trafE KO	2.66667	0.222222
54606	D08	2	17399	110	107	17	0.186624	7.27833	39			0	trafE KO	3	0.354545
54606	D10	1	17399	71	71	33	0.174703	3.84347	22			0	wt	2	0.309859
54606	D10	1	17399	76	76	49	0.183326	2.56657	14			0	wt	2.8	0.184211
54606	D10	1	17399	79	79	68	0.215796	2.15796	10			0	wt	1.25	0.126582
54606	D10	1	17399	81	81	67	0.167593	1.34075	8			0	wt	1.33333	0.0987654
54606	D10	1	17399	82	82	52	0.185487	3.52424	19			0	wt	1.9	0.231707
54606	D10	1	17399	81	81	61	0.151525	2.27288	15			0	wt	1.36364	0.185185
54606	D10	1	17399	77	77	46	0.14958	2.09412	14			0	wt	1.4	0.181818
54606	D10	1	17399	77	77	36	0.131946	0.791678	6			0	wt	1	0.0779221
54606	D10	1	17399	80	80	32	0.161086	2.09412	13			0	wt	1.625	0.1625
54606	D10	1	17399	76	76	20	0.196095	2.74533	14			0	wt	2.33333	0.184211
54606	D10	1	17399	78	78	16	0.169189	2.03027	12			0	wt	1.71429	0.153846
54606	D10	1	17399	81	81	9	0.171255	2.91133	17			0	wt	2.125	0.209877
54606	D10	1	17399	76	76	5	0.179564	2.87303	16			0	wt	2.28571	0.210526
54606	D10	2	17399	86	86	47	0.158336	0.791678	5			0	wt	1	0.0581395
54606	D10	2	17399	90	90	62	0.133365	1.20029	9			0	wt	1.5	0.1
54606	D10	2	17399	96	96	75	0.175574	1.40459	8			0	wt	1.33333	0.0833333
54606	D10	2	17399	96	96	83	0.125866	0.881061	7			0	wt	1.16667	0.0729167
54606	D10	2	17399	100	100	80	0.187279	1.12367	6			0	wt	1	0.06
54606	D10	2	17399	97	97	73	0.135816	1.49397	11			0	wt	1.57143	0.113402
54606	D10	2	17399	97	97	64	0.188799	2.64318	14			0	wt	1.55556	0.14433
54606	D10	2	17399	96	96	48	0.144715	1.30244	9			0	wt	1.8	0.09375
54606	D10	2	17399	100	99	44	0.159613	1.59613	10			0	wt	1.11111	0.1
54606	D10	2	17399	100	100	17	0.161741	2.42611	15			0	wt	1.15385	0.15
54606	D10	2	17399	98	98	35	0.169828	1.69828	10			0	wt	1.42857	0.102041
54606	D10	2	17399	100	99	17	0.146134	1.31521	9			0	wt	1.28571	0.09
54606	D10	2	17399	98	97	15	0.185151	1.8515	10			0	wt	1.42857	0.102041
54606	E08	1	17399	57	48	4
54606	E08	1	17399	56	56	13
54606	E08	1	17399	60	60	14
54606	E08	1	17399	61	59	15
54606	E08	1	17399	63	63	14
54606	E08	1	17399	59	58	11
54606	E08	1	17399	61	59	12
54606	E08	1	17399	60	58	5
54606	E08	1	17399	61	58	9
54606	E08	1	17399	60	56	4
54606	E08	1	17399	56	54	4
54606	E08	1	17399	57	53	2
54606	E08	1	17399	57	50	1
54606	E08	2	17399	65	59	4
54606	E08	2	17399	69	69	15
54606	E08	2	17399	65	64	13
54606	E08	2	17399	62	62	11
54606	E08	2	17399	66	65	12
54606	E08	2	17399	69	69	11
54606	E08	2	17399	73	73	12
54606	E08	2	17399	67	65	6
54606	E08	2	17399	67	64	3
54606	E08	2	17399	68	64	1
54606	E08	2	17399	66	61	0
54606	E08	2	17399	67	65	7
54606	E08	2	17399	69	64	0
54606	E09	1	17399	119	117	38
54606	E09	1	17399	118	118	60
54606	E09	1	17399	135	135	84
54606	E09	1	17399	134	134	91
54606	E09	1	17399	139	138	86
54606	E09	1	17399	135	135	90
54606	E09	1	17399	143	142	83
54606	E09	1	17399	147	143	64
54606	E09	1	17399	148	145	57
54606	E09	1	17399	151	145	36
54606	E09	1	17399	145	144	32
54606	E09	1	17399	140	132	29
54606	E09	1	17399	105	102	7
54606	E09	2	17399	128	120	24
54606	E09	2	17399	104	102	5
54606	E09	2	17399	132	131	46
54606	E09	2	17399	121	121	30
54606	E09	2	17399	130	129	61
54606	E09	2	17399	126	126	72
54606	E09	2	17399	137	136	62
54606	E09	2	17399	130	128	65
54606	E09	2	17399	130	127	54
54606	E09	2	17399	137	134	46
54606	E09	2	17399	133	130	37
54606	E09	2	17399	134	130	25
54606	E09	2	17399	135	132	29
54606	E10	1	17399	55	55	2
54606	E10	1	17399	62	62	13
54606	E10	1	17399	59	59	14
54606	E10	1	17399	58	58	9
54606	E10	1	17399	58	58	19
54606	E10	1	17399	58	58	10
54606	E10	1	17399	55	55	9
54606	E10	1	17399	57	57	3
54606	E10	1	17399	52	52	5
54606	E10	1	17399	51	48	2
54606	E10	1	17399	53	53	2
54606	E10	1	17399	53	51	6
54606	E10	1	17399	54	52	1
54606	E10	2	17399	48	47	7
54606	E10	2	17399	48	48	11
54606	E10	2	17399	52	52	21
54606	E10	2	17399	55	55	25
54606	E10	2	17399	49	49	10
54606	E10	2	17399	47	47	10
54606	E10	2	17399	49	49	11
54606	E10	2	17399	50	50	9
54606	E10	2	17399	45	45	5
54606	E10	2	17399	49	48	4
54606	E10	2	17399	45	45	3
54606	E10	2	17399	49	48	4
54606	E10	2	17399	43	40	0
54606	F08	1	17399	28	1	0
54606	F08	1	17399	38	6	0
54606	F08	1	17399	40	9	0
54606	F08	1	17399	40	4	0
54606	F08	1	17399	38	4	0
54606	F08	1	17399	42	4	0
54606	F08	1	17399	41	5	0
54606	F08	1	17399	41	6	0
54606	F08	1	17399	40	3	0
54606	F08	1	17399	44	5	0
54606	F08	1	17399	43	4	0
54606	F08	1	17399	44	5	0
54606	F08	1	17399	43	5	0
54606	F08	2	17399	39	5	0
54606	F08	2	17399	42	2	0
54606	F08	2	17399	52	8	0
54606	F08	2	17399	62	7	0
54606	F08	2	17399	61	10	0
54606	F08	2	17399	63	9	0
54606	F08	2	17399	64	4	0
54606	F08	2	17399	60	9	0
54606	F08	2	17399	67	9	0
54606	F08	2	17399	67	9	0
54606	F08	2	17399	68	12	0
54606	F08	2	17399	70	10	0
54606	F08	2	17399	64	7	0
54606	F09	1	17399	20	17	0
54606	F09	1	17399	18	16	0
54606	F09	1	17399	17	15	0
54606	F09	1	17399	15	14	0
54606	F09	1	17399	16	14	0
54606	F09	1	17399	16	14	0
54606	F09	1	17399	16	13	0
54606	F09	1	17399	18	15	0
54606	F09	1	17399	18	12	0
54606	F09	1	17399	17	13	0
54606	F09	1	17399	20	12	0
54606	F09	1	17399	21	18	0
54606	F09	1	17399	22	17	0
54606	F09	2	17399	11	8	0
54606	F09	2	17399	11	10	0
54606	F09	2	17399	14	10	0
54606	F09	2	17399	12	11	1
54606	F09	2	17399	13	10	1
54606	F09	2	17399	11	9	0
54606	F09	2	17399	11	7	0
54606	F09	2	17399	11	8	0
54606	F09	2	17399	13	11	0
54606	F09	2	17399	14	9	0
54606	F09	2	17399	11	7	0
54606	F09	2	17399	17	9	0
54606	F09	2	17399	16	13	0
54606	F10	1	17399	35	1	0
54606	F10	1	17399	40	5	0
54606	F10	1	17399	45	6	0
54606	F10	1	17399	47	6	0
54606	F10	1	17399	46	5	0
54606	F10	1	17399	51	4	0
54606	F10	1	17399	55	9	0
54606	F10	1	17399	51	3	0
54606	F10	1	17399	52	3	0
54606	F10	1	17399	51	1	0
54606	F10	1	17399	54	5	0
54606	F10	1	17399	56	6	0
54606	F10	1	17399	56	6	0
54606	F10	2	17399	36	1	0
54606	F10	2	17399	37	3	0
54606	F10	2	17399	35	3	0
54606	F10	2	17399	38	4	0
54606	F10	2	17399	35	5	0
54606	F10	2	17399	36	3	0
54606	F10	2	17399	37	3	0
54606	F10	2	17399	38	5	0
54606	F10	2	17399	38	3	0
54606	F10	2	17399	42	2	0
54606	F10	2	17399	40	1	0
54606	F10	2	17399	40	4	0
54606	F10	2	17399	40	2	0
54606	G08	1	17399	54	37	0
54606	G08	1	17399	63	54	0
54606	G08	1	17399	62	13	0
54606	G08	1	17399	57	35	0
54606	G08	1	17399	57	31	0
54606	G08	1	17399	59	35	0
54606	G08	1	17399	58	45	0
54606	G08	1	17399	65	53	0
54606	G08	1	17399	63	47	0
54606	G08	1	17399	59	54	0
54606	G08	1	17399	62	47	0
54606	G08	1	17399	61	50	0
54606	G08	1	17399	63	56	0
54606	G08	2	17399	59	23	0
54606	G08	2	17399	55	26	0
54606	G08	2	17399	55	8	0
54606	G08	2	17399	70	34	0
54606	G08	2	17399	66	45	0
54606	G08	2	17399	65	48	0
54606	G08	2	17399	67	53	0
54606	G08	2	17399	63	53	0
54606	G08	2	17399	68	57	0
54606	G08	2	17399	69	51	0
54606	G08	2	17399	69	52	0
54606	G08	2	17399	68	53	0
54606	G08	2	17399	64	47	0
54606	G09	1	17399	23	11	0
54606	G09	1	17399	18	5	0
54606	G09	1	17399	16	8	0
54606	G09	1	17399	20	6	0
54606	G09	1	17399	21	10	0
54606	G09	1	17399	22	11	0
54606	G09	1	17399	22	10	0
54606	G09	1	17399	22	6	0
54606	G09	1	17399	20	8	0
54606	G09	1	17399	20	6	0
54606	G09	1	17399	20	7	0
54606	G09	1	17399	22	8	0
54606	G09	1	17399	20	7	0
54606	G09	2	17399	18	5	0
54606	G09	2	17399	20	6	0
54606	G09	2	17399	18	6	0
54606	G09	2	17399	21	6	0
54606	G09	2	17399	22	6	0
54606	G09	2	17399	21	7	0
54606	G09	2	17399	21	9	0
54606	G09	2	17399	23	5	0
54606	G09	2	17399	22	9	0
54606	G09	2	17399	22	13	0
54606	G09	2	17399	22	7	0
54606	G09	2	17399	23	7	0
54606	G09	2	17399	21	7	0
54606	G10	1	17399	30	10	0
54606	G10	1	17399	26	9	0
54606	G10	1	17399	34	16	0
54606	G10	1	17399	31	11	0
54606	G10	1	17399	29	15	0
54606	G10	1	17399	31	12	0
54606	G10	1	17399	32	18	0
54606	G10	1	17399	35	19	0
54606	G10	1	17399	35	23	0
54606	G10	1	17399	32	10	0
54606	G10	1	17399	34	12	0
54606	G10	1	17399	36	15	0
54606	G10	1	17399	35	14	0
54606	G10	2	17399	67	17	0
54606	G10	2	17399	70	26	0
54606	G10	2	17399	71	37	0
54606	G10	2	17399	76	44	0
54606	G10	2	17399	74	18	0
54606	G10	2	17399	70	31	0
54606	G10	2	17399	73	45	0
54606	G10	2	17399	67	39	0
54606	G10	2	17399	70	42	0
54606	G10	2	17399	73	29	0
54606	G10	2	17399	72	31	0
54606	G10	2	17399	69	31	0
54606	G10	2	17399	76	27	0
