# Supplementary material for: A TRAF-like E3 ubiquitin ligase TrafE coordinates ESCRT and autophagy in endolysosomal damage response and cell-autonomous immunity to Mycobacterium marinum
Source: eLife. 2023 Apr 18;12:e85727. doi: 10.7554/eLife.85727 (PMC10181826; doi:10.7554/eLife.85727)
Supplement: Figure 10—source data 2. [file elife-85727-fig10-data2.xlsx]

## Sheet: 2022.12.07_segmantation_Vps32
Plate ID	Well Name	Site ID	Time Point	MEASUREMENT SET ID	Cell: All Dicty_FITC_Features Count_Sum (Lyudmil)	Cell: Vps32 dots_Area_Average (Lyudmil)	Cell: VPS32 dot dicty_Features Count_Sum (Lyudmil)	Cell: VPS32 big dots_Features Count_Sum (Lyudmil)	Cell: VPS32 dots_Area_Sum (Lyudmil)	Cell: VPS32 dots_Features Count_Sum (Lyudmil)	Cell: VPS32 big dots_Area_Average (Lyudmil)	Cell: VPS32 big dots_Area_Sum (Lyudmil)	Cell: VPS32 big dots_Features Count_Sum_1 (Lyudmil)	Strain	Well Name	Norma nb dots
54604	D08	1	1	17400	95	0.209765	80	4	66.7053	318	0.89383	4.46915	5	trafE KO	D08	0.894737
54604	D08	2	1	17400	97	0.188034	76	1	34.9743	186	0.791678	0.791678	1	trafE KO	D08	0.793814
54604	D09	1	1	17400	0		0	0		0			0	wt	D09	#DIV/0!
54604	D09	2	1	17400	0		0	0		0			0	wt	D09	#DIV/0!
54604	D10	1	1	17400	69	0.206632	55	2	39.6733	192	0.927881	5.56728	6	trafE KO	D10	0.884058
54604	D10	2	1	17400	86	0.19729	66	1	42.0228	213	0.472453	0.472453	1	trafE KO	D10	0.77907
54604	E08	1	1	17400	63	0.277572	47	5	51.906	187	1.02036	11.224	11	wt	E08	0.920635
54604	E08	2	1	17400	74	0.297144	58	7	68.046	229	1.02791	10.279	10	wt	E08	0.918919
54604	E09	1	1	17400	104	0.241792	96	5	128.15	530	0.80909	8.89999	11	trafE KO	E09	1.02885
54604	E09	2	1	17400	125	0.247217	120	14	177.502	718	0.746987	16.4337	22	trafE KO	E09	1.136
54604	E10	1	1	17400	60	0.251446	48	2	46.5175	185	0.612912	1.22582	2	wt	E10	0.833333
54604	E10	2	1	17400	51	0.257638	42	2	37.8729	147	0.81977	4.09885	5	wt	E10	0.921569
54606	D08	1	1	17401	99	0.265973	99	6	316.773	1191	0.804447	10.4578	13	trafE KO	D08	1.13131
54606	D08	1	2	17401	106	0.421508	106	74	697.596	1655	1.08368	204.815	189	trafE KO	D08	2.78302
54606	D08	1	3	17401	106	0.464627	106	98	829.359	1785	1.13048	341.405	302	trafE KO	D08	3.84906
54606	D08	1	4	17401	109	0.458252	109	99	784.527	1712	1.089	328.878	302	trafE KO	D08	3.77064
54606	D08	1	5	17401	112	0.454492	112	103	814.905	1793	1.03687	327.653	316	trafE KO	D08	3.82143
54606	D08	1	6	17401	114	0.432597	114	99	659.71	1525	0.957624	239.406	250	trafE KO	D08	3.19298
54606	D08	1	7	17401	112	0.405821	112	86	594.933	1466	0.860591	166.955	194	trafE KO	D08	2.73214
54606	D08	1	8	17401	116	0.377691	116	72	554.072	1467	0.860511	110.145	128	trafE KO	D08	2.10345
54606	D08	1	9	17401	114	0.363048	114	70	483.217	1331	0.792014	90.2896	114	trafE KO	D08	2
54606	D08	1	10	17401	111	0.343403	110	44	432.001	1258	0.766552	47.5262	62	trafE KO	D08	1.54955
54606	D08	1	11	17401	112	0.33345	112	30	371.463	1114	0.786244	36.9535	47	trafE KO	D08	1.41964
54606	D08	1	12	17401	112	0.310226	112	25	344.661	1111	0.779308	24.9379	32	trafE KO	D08	1.28571
54606	D08	1	13	17401	114	0.297096	114	16	292.64	985	0.729177	13.8544	19	trafE KO	D08	1.16667
54606	D08	2	1	17401	92	0.268691	91	7	291.261	1084	0.848558	9.33414	11	trafE KO	D08	1.1087
54606	D08	2	2	17401	101	0.376559	101	50	568.604	1510	1.08464	114.972	106	trafE KO	D08	2.0495
54606	D08	2	3	17401	105	0.420429	105	71	657.131	1563	1.13085	217.124	192	trafE KO	D08	2.82857
54606	D08	2	4	17401	112	0.429664	112	87	697.775	1624	1.11863	271.826	243	trafE KO	D08	3.16964
54606	D08	2	5	17401	108	0.4317	108	84	664.818	1540	1.14054	277.151	243	trafE KO	D08	3.25
54606	D08	2	6	17401	108	0.420799	108	85	594.589	1413	1.00472	209.986	209	trafE KO	D08	2.93519
54606	D08	2	7	17401	106	0.394142	105	79	515.931	1309	1.01885	180.337	177	trafE KO	D08	2.66038
54606	D08	2	8	17401	108	0.386374	107	73	464.421	1202	0.96166	135.594	141	trafE KO	D08	2.2963
54606	D08	2	9	17401	111	0.363376	109	59	420.79	1158	0.79045	82.2068	104	trafE KO	D08	1.91892
54606	D08	2	10	17401	112	0.343374	111	38	366.036	1066	0.884253	49.5182	56	trafE KO	D08	1.49107
54606	D08	2	11	17401	110	0.330649	109	34	345.197	1044	0.853782	37.5664	44	trafE KO	D08	1.39091
54606	D08	2	12	17401	113	0.310925	113	26	305.639	983	0.796382	30.2625	38	trafE KO	D08	1.33628
54606	D08	2	13	17401	112	0.317676	109	21	282.731	890	0.988415	26.6872	27	trafE KO	D08	1.21429
54606	D09	1	1	17401	0		0	0		0			0	wt	D09	#DIV/0!
54606	D09	1	2	17401	0		0	0		0			0	wt	D09	#DIV/0!
54606	D09	1	3	17401	0		0	0		0			0	wt	D09	#DIV/0!
54606	D09	1	4	17401	0		0	0		0			0	wt	D09	#DIV/0!
54606	D09	1	5	17401	0		0	0		0			0	wt	D09	#DIV/0!
54606	D09	1	6	17401	0		0	0		0			0	wt	D09	#DIV/0!
54606	D09	1	7	17401	0		0	0		0			0	wt	D09	#DIV/0!
54606	D09	1	8	17401	0		0	0		0			0	wt	D09	#DIV/0!
54606	D09	1	9	17401	0		0	0		0			0	wt	D09	#DIV/0!
54606	D09	1	10	17401	0		0	0		0			0	wt	D09	#DIV/0!
54606	D09	1	11	17401	0		0	0		0			0	wt	D09	#DIV/0!
54606	D09	1	12	17401	0		0	0		0			0	wt	D09	#DIV/0!
54606	D09	1	13	17401	0		0	0		0			0	wt	D09	#DIV/0!
54606	D09	2	1	17401	0		0	0		0			0	wt	D09	#DIV/0!
54606	D09	2	2	17401	0		0	0		0			0	wt	D09	#DIV/0!
54606	D09	2	3	17401	0		0	0		0			0	wt	D09	#DIV/0!
54606	D09	2	4	17401	0		0	0		0			0	wt	D09	#DIV/0!
54606	D09	2	5	17401	0		0	0		0			0	wt	D09	#DIV/0!
54606	D09	2	6	17401	0		0	0		0			0	wt	D09	#DIV/0!
54606	D09	2	7	17401	0		0	0		0			0	wt	D09	#DIV/0!
54606	D09	2	8	17401	0		0	0		0			0	wt	D09	#DIV/0!
54606	D09	2	9	17401	0		0	0		0			0	wt	D09	#DIV/0!
54606	D09	2	10	17401	0		0	0		0			0	wt	D09	#DIV/0!
54606	D09	2	11	17401	0		0	0		0			0	wt	D09	#DIV/0!
54606	D09	2	12	17401	0		0	0		0			0	wt	D09	#DIV/0!
54606	D09	2	13	17401	0		0	0		0			0	wt	D09	#DIV/0!
54606	D10	1	1	17401	71	0.375867	71	39	460.437	1225	0.968601	93.9543	97	trafE KO	D10	2.3662
54606	D10	1	2	17401	79	0.434988	79	59	494.582	1137	1.14921	190.769	166	trafE KO	D10	3.10127
54606	D10	1	3	17401	79	0.458458	79	70	568.029	1239	1.14114	229.37	201	trafE KO	D10	3.5443
54606	D10	1	4	17401	80	0.456008	80	71	611.507	1341	1.15168	249.915	217	trafE KO	D10	3.7125
54606	D10	1	5	17401	80	0.434513	80	68	529.671	1219	0.99507	195.034	196	trafE KO	D10	3.45
54606	D10	1	6	17401	82	0.417275	82	64	493.637	1183	0.979843	141.097	144	trafE KO	D10	2.7561
54606	D10	1	7	17401	80	0.3914	80	59	445.804	1139	0.885202	98.2575	111	trafE KO	D10	2.3875
54606	D10	1	8	17401	78	0.37309	78	50	401.445	1076	0.824995	71.7746	87	trafE KO	D10	2.11538
54606	D10	1	9	17401	81	0.376364	81	42	381.257	1013	0.862846	58.6736	68	trafE KO	D10	1.83951
54606	D10	1	10	17401	79	0.335196	79	32	319.442	953	0.800384	35.2169	44	trafE KO	D10	1.55696
54606	D10	1	11	17401	79	0.326867	79	24	303.66	929	0.762689	28.2195	37	trafE KO	D10	1.46835
54606	D10	1	12	17401	81	0.311948	81	13	256.734	823	0.886169	17.7234	20	trafE KO	D10	1.24691
54606	D10	1	13	17401	79	0.299183	79	7	230.072	769	0.695911	5.56728	8	trafE KO	D10	1.10127
54606	D10	2	1	17401	85	0.393821	85	56	587.974	1493	1.02649	134.47	131	trafE KO	D10	2.54118
54606	D10	2	2	17401	91	0.435574	91	69	603.706	1386	1.14669	244.245	213	trafE KO	D10	3.34066
54606	D10	2	3	17401	97	0.474366	97	83	655.573	1382	1.17857	279.322	237	trafE KO	D10	3.4433
54606	D10	2	4	17401	98	0.471242	98	89	770.009	1634	1.15542	348.938	302	trafE KO	D10	4.08163
54606	D10	2	5	17401	101	0.447666	101	92	632.104	1412	1.01008	243.428	241	trafE KO	D10	3.38614
54606	D10	2	6	17401	100	0.416345	100	82	587.463	1411	0.946694	189.339	200	trafE KO	D10	3
54606	D10	2	7	17401	100	0.411604	100	78	561.427	1364	0.966875	155.667	161	trafE KO	D10	2.61
54606	D10	2	8	17401	100	0.387888	100	60	493.394	1272	0.898512	107.821	120	trafE KO	D10	2.2
54606	D10	2	9	17401	101	0.37455	101	59	462.57	1235	0.777855	84.7862	109	trafE KO	D10	2.07921
54606	D10	2	10	17401	102	0.347037	102	47	415.056	1196	0.869078	56.4901	65	trafE KO	D10	1.63725
54606	D10	2	11	17401	102	0.326809	101	28	356.549	1091	0.756751	25.7295	34	trafE KO	D10	1.32353
54606	D10	2	12	17401	105	0.324337	105	25	338.608	1044	0.784894	25.1166	32	trafE KO	D10	1.30476
54606	D10	2	13	17401	104	0.306469	103	24	299.114	976	0.75205	21.8095	29	trafE KO	D10	1.26923
54606	E08	1	1	17401	64	0.263424	52	6	79.0273	300	0.829985	8.29985	10	wt	E08	0.96875
54606	E08	1	2	17401	63	0.333067	62	15	237.81	714	0.781747	28.1429	36	wt	E08	1.55556
54606	E08	1	3	17401	61	0.344638	61	19	245.727	713	0.907845	37.2216	41	wt	E08	1.67213
54606	E08	1	4	17401	65	0.34136	63	24	248.51	728	0.719557	38.8561	54	wt	E08	1.8
54606	E08	1	5	17401	66	0.340608	64	20	243.875	716	0.881669	37.0301	42	wt	E08	1.60606
54606	E08	1	6	17401	63	0.331363	61	15	214.724	648	0.845119	22.8182	27	wt	E08	1.39683
54606	E08	1	7	17401	66	0.322352	64	20	204.049	633	0.893418	27.696	31	wt	E08	1.43939
54606	E08	1	8	17401	65	0.325007	60	13	172.254	530	0.697826	13.9565	20	wt	E08	1.23077
54606	E08	1	9	17401	63	0.301433	61	10	154.032	511	0.709171	9.21922	13	wt	E08	1.1746
54606	E08	1	10	17401	64	0.308843	60	6	137.126	444	0.744858	4.46915	6	wt	E08	1.03125
54606	E08	1	11	17401	65	0.295129	63	8	125.43	425	0.620573	6.20573	10	wt	E08	1.12308
54606	E08	1	12	17401	66	0.275908	60	2	93.5329	339	0.834241	2.50272	3	wt	E08	0.954545
54606	E08	1	13	17401	61	0.28506	53	1	85.2331	299	0.957675	0.957675	1	wt	E08	0.885246
54606	E08	2	1	17401	71	0.271327	64	6	124.268	458	1.10543	7.73801	7	wt	E08	1
54606	E08	2	2	17401	74	0.31747	74	26	300.327	946	0.873182	41.0396	47	wt	E08	1.63514
54606	E08	2	3	17401	71	0.33447	69	20	296.675	887	0.976403	43.9381	45	wt	E08	1.60563
54606	E08	2	4	17401	71	0.341147	71	13	292.704	858	1.07973	36.7109	34	wt	E08	1.47887
54606	E08	2	5	17401	72	0.343753	71	20	295.628	860	0.814963	27.7087	34	wt	E08	1.45833
54606	E08	2	6	17401	77	0.325878	77	16	270.805	831	0.893443	29.4836	33	wt	E08	1.42857
54606	E08	2	7	17401	76	0.31966	76	18	262.76	822	0.704056	20.4176	29	wt	E08	1.38158
54606	E08	2	8	17401	72	0.306061	71	14	227.71	744	0.810554	18.6427	23	wt	E08	1.30556
54606	E08	2	9	17401	72	0.298096	71	8	190.782	640	0.765158	9.94705	13	wt	E08	1.16667
54606	E08	2	10	17401	73	0.282667	70	4	171.296	606	0.66034	4.62238	7	wt	E08	1.05479
54606	E08	2	11	17401	72	0.26717	68	2	146.409	548	0.804447	1.60889	2	wt	E08	0.972222
54606	E08	2	12	17401	74	0.252556	71	0	109.609	434			0	wt	E08	0.959459
54606	E08	2	13	17401	74	0.256643	65	2	93.418	364	0.561836	1.68551	3	wt	E08	0.918919
54606	E09	1	1	17401	119	0.268838	115	10	323.95	1205	1.00237	16.0379	16	trafE KO	E09	1.10084
54606	E09	1	2	17401	138	0.353257	136	47	644.694	1825	1.05842	96.3166	91	trafE KO	E09	1.64493
54606	E09	1	3	17401	134	0.407138	133	77	852.548	2094	1.07866	234.069	217	trafE KO	E09	2.61194
54606	E09	1	4	17401	143	0.42209	143	94	959.833	2274	1.1216	366.764	327	trafE KO	E09	3.28671
54606	E09	1	5	17401	148	0.419759	148	98	957.471	2281	1.09538	426.102	389	trafE KO	E09	3.62838
54606	E09	1	6	17401	154	0.411156	154	100	904.543	2200	1.06456	370.467	348	trafE KO	E09	3.25974
54606	E09	1	7	17401	158	0.397561	157	100	813.807	2047	1.05243	279.948	266	trafE KO	E09	2.67722
54606	E09	1	8	17401	162	0.380448	160	96	715.243	1880	0.998169	215.605	216	trafE KO	E09	2.32099
54606	E09	1	9	17401	165	0.360444	160	84	614.917	1706	0.850324	142.004	167	trafE KO	E09	1.98182
54606	E09	1	10	17401	165	0.341302	160	73	527.653	1546	0.786148	99.8408	127	trafE KO	E09	1.73939
54606	E09	1	11	17401	164	0.344176	156	56	457.066	1328	0.761884	73.1408	96	trafE KO	E09	1.53659
54606	E09	1	12	17401	166	0.325624	161	43	424.288	1303	0.827308	51.2931	62	trafE KO	E09	1.34337
54606	E09	1	13	17401	160	0.326126	151	41	378.958	1162	0.888106	51.5101	58	trafE KO	E09	1.30625
54606	E09	2	1	17401	121	0.261819	118	7	274.125	1047	0.922372	15.6803	17	trafE KO	E09	1.1157
54606	E09	2	2	17401	134	0.337487	133	41	582.164	1725	0.919511	81.8365	89	trafE KO	E09	1.65672
54606	E09	2	3	17401	145	0.37235	143	62	686.985	1845	0.924611	139.616	151	trafE KO	E09	2.02759
54606	E09	2	4	17401	148	0.387476	145	68	825.324	2130	1.08123	236.788	219	trafE KO	E09	2.45946
54606	E09	2	5	17401	144	0.395016	143	75	827.163	2094	1.08733	268.57	247	trafE KO	E09	2.70833
54606	E09	2	6	17401	148	0.392623	146	76	740.487	1886	1.0796	258.023	239	trafE KO	E09	2.60135
54606	E09	2	7	17401	141	0.37793	139	73	593.35	1570	1.00298	186.555	186	trafE KO	E09	2.30496
54606	E09	2	8	17401	156	0.364274	148	70	513.263	1409	0.956153	144.379	151	trafE KO	E09	1.91667
54606	E09	2	9	17401	153	0.343017	145	58	458.956	1338	0.933438	100.811	108	trafE KO	E09	1.65359
54606	E09	2	10	17401	155	0.320574	149	52	382.444	1193	0.892872	71.4298	80	trafE KO	E09	1.47742
54606	E09	2	11	17401	152	0.324979	147	36	338.953	1043	0.951085	58.9672	62	trafE KO	E09	1.375
54606	E09	2	12	17401	151	0.322735	145	37	318.216	986	0.853588	56.3368	66	trafE KO	E09	1.39735
54606	E09	2	13	17401	149	0.311153	138	36	309.597	995	0.798906	42.342	53	trafE KO	E09	1.28188
54606	E10	1	1	17401	60	0.271272	60	7	150.827	556	0.869569	8.69569	10	wt	E10	1.16667
54606	E10	1	2	17401	64	0.332094	64	14	211.212	636	0.98449	29.5347	30	wt	E10	1.46875
54606	E10	1	3	17401	64	0.32658	64	16	225.667	691	0.855147	29.075	34	wt	E10	1.53125
54606	E10	1	4	17401	63	0.356171	63	24	260.717	732	0.909272	39.0987	43	wt	E10	1.68254
54606	E10	1	5	17401	60	0.334717	60	12	227.607	680	0.701715	15.4377	22	wt	E10	1.36667
54606	E10	1	6	17401	63	0.32537	63	12	217.022	667	0.980659	14.7099	15	wt	E10	1.2381
54606	E10	1	7	17401	60	0.342306	59	13	190.322	556	0.809767	19.4344	24	wt	E10	1.38333
54606	E10	1	8	17401	62	0.327761	62	7	180.924	552	0.689526	8.96384	13	wt	E10	1.20968
54606	E10	1	9	17401	58	0.313181	58	11	158.783	507	0.750367	12.7562	17	wt	E10	1.2931
54606	E10	1	10	17401	59	0.31047	58	5	158.029	509	0.558998	5.03099	9	wt	E10	1.13559
54606	E10	1	11	17401	62	0.29698	60	6	122.059	411	0.731481	5.12037	7	wt	E10	1.08065
54606	E10	1	12	17401	62	0.272154	59	2	105.868	389	0.84701	2.54103	3	wt	E10	1
54606	E10	1	13	17401	62	0.258485	59	2	94.6055	366	0.9747	2.9241	3	wt	E10	1
54606	E10	2	1	17401	49	0.310141	48	9	152.59	492	0.814212	13.8416	17	wt	E10	1.32653
54606	E10	2	2	17401	55	0.358559	55	17	218.363	609	0.731128	22.665	31	wt	E10	1.56364
54606	E10	2	3	17401	56	0.377105	56	27	263.974	700	0.934582	43.9254	47	wt	E10	1.83929
54606	E10	2	4	17401	58	0.374746	58	31	312.164	833	0.955972	57.3583	60	wt	E10	2.03448
54606	E10	2	5	17401	52	0.364169	52	17	220.687	606	0.724242	23.1757	32	wt	E10	1.61538
54606	E10	2	6	17401	53	0.353196	53	20	208.033	589	0.75061	27.7726	37	wt	E10	1.69811
54606	E10	2	7	17401	52	0.33579	52	13	198.788	592	0.84442	19.4216	23	wt	E10	1.44231
54606	E10	2	8	17401	56	0.321006	56	15	188.751	588	0.668631	14.7099	22	wt	E10	1.39286
54606	E10	2	9	17401	53	0.321353	53	12	175.459	546	0.604399	9.06599	15	wt	E10	1.28302
54606	E10	2	10	17401	54	0.295997	54	7	148.887	503	0.750533	6.7548	9	wt	E10	1.16667
54606	E10	2	11	17401	54	0.299936	53	5	127.473	425	0.81977	4.09885	5	wt	E10	1.07407
54606	E10	2	12	17401	52	0.278966	49	4	87.5953	314	0.715064	2.86026	4	wt	E10	1.01923
54606	E10	2	13	17401	51	0.271884	46	3	79.9339	294	0.570349	1.71105	3	wt	E10	0.960784
