# Supplementary material for: A TRAF-like E3 ubiquitin ligase TrafE coordinates ESCRT and autophagy in endolysosomal damage response and cell-autonomous immunity to Mycobacterium marinum
Source: eLife. 2023 Apr 18;12:e85727. doi: 10.7554/eLife.85727 (PMC10181826; doi:10.7554/eLife.85727)
Supplement: Figure 11—figure supplement 1—source data 1. [file elife-85727-fig11-figsupp1-data1.xlsx]

## Sheet: Sheet1
time	strain_laser	dot_nb	bio_rep
0	LLOMe_90x1 - E_V4_dsRed_SorMC_Sorb.Project Maximum Z_XY1637760564_Z0_T00_C1.tif	19	1
1	LLOMe_90x1 - E_V4_dsRed_SorMC_Sorb.Project Maximum Z_XY1637760564_Z0_T00_C1.tif	18	1
2	LLOMe_90x1 - E_V4_dsRed_SorMC_Sorb.Project Maximum Z_XY1637760564_Z0_T00_C1.tif	18	1
3	LLOMe_90x1 - E_V4_dsRed_SorMC_Sorb.Project Maximum Z_XY1637760564_Z0_T00_C1.tif	15	1
4	LLOMe_90x1 - E_V4_dsRed_SorMC_Sorb.Project Maximum Z_XY1637760564_Z0_T00_C1.tif	15	1
5	LLOMe_90x1 - E_V4_dsRed_SorMC_Sorb.Project Maximum Z_XY1637760564_Z0_T00_C1.tif	11	1
6	LLOMe_90x1 - E_V4_dsRed_SorMC_Sorb.Project Maximum Z_XY1637760564_Z0_T00_C1.tif	21	1
7	LLOMe_90x1 - E_V4_dsRed_SorMC_Sorb.Project Maximum Z_XY1637760564_Z0_T00_C1.tif	29	1
8	LLOMe_90x1 - E_V4_dsRed_SorMC_Sorb.Project Maximum Z_XY1637760564_Z0_T00_C1.tif	42	1
9	LLOMe_90x1 - E_V4_dsRed_SorMC_Sorb.Project Maximum Z_XY1637760564_Z0_T00_C1.tif	58	1
10	LLOMe_90x1 - E_V4_dsRed_SorMC_Sorb.Project Maximum Z_XY1637760564_Z0_T00_C1.tif	65	1
11	LLOMe_90x1 - E_V4_dsRed_SorMC_Sorb.Project Maximum Z_XY1637760564_Z0_T00_C1.tif	49	1
12	LLOMe_90x1 - E_V4_dsRed_SorMC_Sorb.Project Maximum Z_XY1637760564_Z0_T00_C1.tif	55	1
13	LLOMe_90x1 - E_V4_dsRed_SorMC_Sorb.Project Maximum Z_XY1637760564_Z0_T00_C1.tif	66	1
14	LLOMe_90x1 - E_V4_dsRed_SorMC_Sorb.Project Maximum Z_XY1637760564_Z0_T00_C1.tif	57	1
15	LLOMe_90x1 - E_V4_dsRed_SorMC_Sorb.Project Maximum Z_XY1637760564_Z0_T00_C1.tif	58	1
16	LLOMe_90x1 - E_V4_dsRed_SorMC_Sorb.Project Maximum Z_XY1637760564_Z0_T00_C1.tif	54	1
17	LLOMe_90x1 - E_V4_dsRed_SorMC_Sorb.Project Maximum Z_XY1637760564_Z0_T00_C1.tif	50	1
18	LLOMe_90x1 - E_V4_dsRed_SorMC_Sorb.Project Maximum Z_XY1637760564_Z0_T00_C1.tif	65	1
19	LLOMe_90x1 - E_V4_dsRed_SorMC_Sorb.Project Maximum Z_XY1637760564_Z0_T00_C1.tif	63	1
20	LLOMe_90x1 - E_V4_dsRed_SorMC_Sorb.Project Maximum Z_XY1637760564_Z0_T00_C1.tif	55	1
21	LLOMe_90x1 - E_V4_dsRed_SorMC_Sorb.Project Maximum Z_XY1637760564_Z0_T00_C1.tif	66	1
22	LLOMe_90x1 - E_V4_dsRed_SorMC_Sorb.Project Maximum Z_XY1637760564_Z0_T00_C1.tif	66	1
23	LLOMe_90x1 - E_V4_dsRed_SorMC_Sorb.Project Maximum Z_XY1637760564_Z0_T00_C1.tif	69	1
24	LLOMe_90x1 - E_V4_dsRed_SorMC_Sorb.Project Maximum Z_XY1637760564_Z0_T00_C1.tif	65	1
25	LLOMe_90x1 - E_V4_dsRed_SorMC_Sorb.Project Maximum Z_XY1637760564_Z0_T00_C1.tif	73	1
26	LLOMe_90x1 - E_V4_dsRed_SorMC_Sorb.Project Maximum Z_XY1637760564_Z0_T00_C1.tif	72	1
27	LLOMe_90x1 - E_V4_dsRed_SorMC_Sorb.Project Maximum Z_XY1637760564_Z0_T00_C1.tif	65	1
28	LLOMe_90x1 - E_V4_dsRed_SorMC_Sorb.Project Maximum Z_XY1637760564_Z0_T00_C1.tif	59	1
29	LLOMe_90x1 - E_V4_dsRed_SorMC_Sorb.Project Maximum Z_XY1637760564_Z0_T00_C1.tif	54	1
30	LLOMe_90x1 - E_V4_dsRed_SorMC_Sorb.Project Maximum Z_XY1637760564_Z0_T00_C1.tif	53	1
31	LLOMe_90x1 - E_V4_dsRed_SorMC_Sorb.Project Maximum Z_XY1637760564_Z0_T00_C1.tif	58	1
32	LLOMe_90x1 - E_V4_dsRed_SorMC_Sorb.Project Maximum Z_XY1637760564_Z0_T00_C1.tif	62	1
33	LLOMe_90x1 - E_V4_dsRed_SorMC_Sorb.Project Maximum Z_XY1637760564_Z0_T00_C1.tif	55	1
34	LLOMe_90x1 - E_V4_dsRed_SorMC_Sorb.Project Maximum Z_XY1637760564_Z0_T00_C1.tif	70	1
35	LLOMe_90x1 - E_V4_dsRed_SorMC_Sorb.Project Maximum Z_XY1637760564_Z0_T00_C1.tif	84	1
36	LLOMe_90x1 - E_V4_dsRed_SorMC_Sorb.Project Maximum Z_XY1637760564_Z0_T00_C1.tif	71	1
37	LLOMe_90x1 - E_V4_dsRed_SorMC_Sorb.Project Maximum Z_XY1637760564_Z0_T00_C1.tif	61	1
38	LLOMe_90x1 - E_V4_dsRed_SorMC_Sorb.Project Maximum Z_XY1637760564_Z0_T00_C1.tif	61	1
39	LLOMe_90x1 - E_V4_dsRed_SorMC_Sorb.Project Maximum Z_XY1637760564_Z0_T00_C1.tif	64	1
40	LLOMe_90x1 - E_V4_dsRed_SorMC_Sorb.Project Maximum Z_XY1637760564_Z0_T00_C1.tif	63	1
41	LLOMe_90x1 - E_V4_dsRed_SorMC_Sorb.Project Maximum Z_XY1637760564_Z0_T00_C1.tif	63	1
42	LLOMe_90x1 - E_V4_dsRed_SorMC_Sorb.Project Maximum Z_XY1637760564_Z0_T00_C1.tif	71	1
43	LLOMe_90x1 - E_V4_dsRed_SorMC_Sorb.Project Maximum Z_XY1637760564_Z0_T00_C1.tif	79	1
44	LLOMe_90x1 - E_V4_dsRed_SorMC_Sorb.Project Maximum Z_XY1637760564_Z0_T00_C1.tif	72	1
45	LLOMe_90x1 - E_V4_dsRed_SorMC_Sorb.Project Maximum Z_XY1637760564_Z0_T00_C1.tif	80	1
46	LLOMe_90x1 - E_V4_dsRed_SorMC_Sorb.Project Maximum Z_XY1637760564_Z0_T00_C1.tif	78	1
47	LLOMe_90x1 - E_V4_dsRed_SorMC_Sorb.Project Maximum Z_XY1637760564_Z0_T00_C1.tif	87	1
48	LLOMe_90x1 - E_V4_dsRed_SorMC_Sorb.Project Maximum Z_XY1637760564_Z0_T00_C1.tif	84	1
49	LLOMe_90x1 - E_V4_dsRed_SorMC_Sorb.Project Maximum Z_XY1637760564_Z0_T00_C1.tif	80	1
50	LLOMe_90x1 - E_V4_dsRed_SorMC_Sorb.Project Maximum Z_XY1637760564_Z0_T00_C1.tif	81	1
51	LLOMe_90x1 - E_V4_dsRed_SorMC_Sorb.Project Maximum Z_XY1637760564_Z0_T00_C1.tif	65	1
52	LLOMe_90x1 - E_V4_dsRed_SorMC_Sorb.Project Maximum Z_XY1637760564_Z0_T00_C1.tif	91	1
53	LLOMe_90x1 - E_V4_dsRed_SorMC_Sorb.Project Maximum Z_XY1637760564_Z0_T00_C1.tif	84	1
54	LLOMe_90x1 - E_V4_dsRed_SorMC_Sorb.Project Maximum Z_XY1637760564_Z0_T00_C1.tif	85	1
55	LLOMe_90x1 - E_V4_dsRed_SorMC_Sorb.Project Maximum Z_XY1637760564_Z0_T00_C1.tif	90	1
56	LLOMe_90x1 - E_V4_dsRed_SorMC_Sorb.Project Maximum Z_XY1637760564_Z0_T00_C1.tif	82	1
57	LLOMe_90x1 - E_V4_dsRed_SorMC_Sorb.Project Maximum Z_XY1637760564_Z0_T00_C1.tif	72	1
58	LLOMe_90x1 - E_V4_dsRed_SorMC_Sorb.Project Maximum Z_XY1637760564_Z0_T00_C1.tif	90	1
59	LLOMe_90x1 - E_V4_dsRed_SorMC_Sorb.Project Maximum Z_XY1637760564_Z0_T00_C1.tif	95	1
60	LLOMe_90x1 - E_V4_dsRed_SorMC_Sorb.Project Maximum Z_XY1637760564_Z0_T00_C1.tif	97	1
61	LLOMe_90x1 - E_V4_dsRed_SorMC_Sorb.Project Maximum Z_XY1637760564_Z0_T00_C1.tif	100	1
62	LLOMe_90x1 - E_V4_dsRed_SorMC_Sorb.Project Maximum Z_XY1637760564_Z0_T00_C1.tif	95	1
63	LLOMe_90x1 - E_V4_dsRed_SorMC_Sorb.Project Maximum Z_XY1637760564_Z0_T00_C1.tif	99	1
64	LLOMe_90x1 - E_V4_dsRed_SorMC_Sorb.Project Maximum Z_XY1637760564_Z0_T00_C1.tif	85	1
65	LLOMe_90x1 - E_V4_dsRed_SorMC_Sorb.Project Maximum Z_XY1637760564_Z0_T00_C1.tif	91	1
66	LLOMe_90x1 - E_V4_dsRed_SorMC_Sorb.Project Maximum Z_XY1637760564_Z0_T00_C1.tif	84	1
67	LLOMe_90x1 - E_V4_dsRed_SorMC_Sorb.Project Maximum Z_XY1637760564_Z0_T00_C1.tif	94	1
68	LLOMe_90x1 - E_V4_dsRed_SorMC_Sorb.Project Maximum Z_XY1637760564_Z0_T00_C1.tif	101	1
69	LLOMe_90x1 - E_V4_dsRed_SorMC_Sorb.Project Maximum Z_XY1637760564_Z0_T00_C1.tif	105	1
70	LLOMe_90x1 - E_V4_dsRed_SorMC_Sorb.Project Maximum Z_XY1637760564_Z0_T00_C1.tif	88	1
71	LLOMe_90x1 - E_V4_dsRed_SorMC_Sorb.Project Maximum Z_XY1637760564_Z0_T00_C1.tif	103	1
72	LLOMe_90x1 - E_V4_dsRed_SorMC_Sorb.Project Maximum Z_XY1637760564_Z0_T00_C1.tif	70	1
73	LLOMe_90x1 - E_V4_dsRed_SorMC_Sorb.Project Maximum Z_XY1637760564_Z0_T00_C1.tif	89	1
74	LLOMe_90x1 - E_V4_dsRed_SorMC_Sorb.Project Maximum Z_XY1637760564_Z0_T00_C1.tif	79	1
75	LLOMe_90x1 - E_V4_dsRed_SorMC_Sorb.Project Maximum Z_XY1637760564_Z0_T00_C1.tif	82	1
76	LLOMe_90x1 - E_V4_dsRed_SorMC_Sorb.Project Maximum Z_XY1637760564_Z0_T00_C1.tif	89	1
77	LLOMe_90x1 - E_V4_dsRed_SorMC_Sorb.Project Maximum Z_XY1637760564_Z0_T00_C1.tif	84	1
78	LLOMe_90x1 - E_V4_dsRed_SorMC_Sorb.Project Maximum Z_XY1637760564_Z0_T00_C1.tif	98	1
79	LLOMe_90x1 - E_V4_dsRed_SorMC_Sorb.Project Maximum Z_XY1637760564_Z0_T00_C1.tif	78	1
80	LLOMe_90x1 - E_V4_dsRed_SorMC_Sorb.Project Maximum Z_XY1637760564_Z0_T00_C1.tif	89	1
81	LLOMe_90x1 - E_V4_dsRed_SorMC_Sorb.Project Maximum Z_XY1637760564_Z0_T00_C1.tif	81	1
82	LLOMe_90x1 - E_V4_dsRed_SorMC_Sorb.Project Maximum Z_XY1637760564_Z0_T00_C1.tif	75	1
83	LLOMe_90x1 - E_V4_dsRed_SorMC_Sorb.Project Maximum Z_XY1637760564_Z0_T00_C1.tif	81	1
84	LLOMe_90x1 - E_V4_dsRed_SorMC_Sorb.Project Maximum Z_XY1637760564_Z0_T00_C1.tif	85	1
85	LLOMe_90x1 - E_V4_dsRed_SorMC_Sorb.Project Maximum Z_XY1637760564_Z0_T00_C1.tif	88	1
86	LLOMe_90x1 - E_V4_dsRed_SorMC_Sorb.Project Maximum Z_XY1637760564_Z0_T00_C1.tif	80	1
87	LLOMe_90x1 - E_V4_dsRed_SorMC_Sorb.Project Maximum Z_XY1637760564_Z0_T00_C1.tif	74	1
88	LLOMe_90x1 - E_V4_dsRed_SorMC_Sorb.Project Maximum Z_XY1637760564_Z0_T00_C1.tif	84	1
89	LLOMe_90x1 - E_V4_dsRed_SorMC_Sorb.Project Maximum Z_XY1637760564_Z0_T00_C1.tif	78	1
90	LLOMe_90x1 - E_V4_dsRed_SorMC_Sorb.Project Maximum Z_XY1637760564_Z0_T00_C1.tif	72	1
0	LLOMe_90x1 - E_V4_dsRed_SorMC_Sorb.Project Maximum Z_XY1637760564_Z0_T00_C2.tif	0	1
1	LLOMe_90x1 - E_V4_dsRed_SorMC_Sorb.Project Maximum Z_XY1637760564_Z0_T00_C2.tif	9	1
2	LLOMe_90x1 - E_V4_dsRed_SorMC_Sorb.Project Maximum Z_XY1637760564_Z0_T00_C2.tif	12	1
3	LLOMe_90x1 - E_V4_dsRed_SorMC_Sorb.Project Maximum Z_XY1637760564_Z0_T00_C2.tif	6	1
4	LLOMe_190x1 - E_V4_dsRed_SorMC_Sorb.Project Maximum Z_XY1637760564_Z0_T00_C2.tif	3	1
5	LLOMe_90x1 - E_V4_dsRed_SorMC_Sorb.Project Maximum Z_XY1637760564_Z0_T00_C2.tif	10	1
6	LLOMe_90x1 - E_V4_dsRed_SorMC_Sorb.Project Maximum Z_XY1637760564_Z0_T00_C2.tif	6	1
7	LLOMe_90x1 - E_V4_dsRed_SorMC_Sorb.Project Maximum Z_XY1637760564_Z0_T00_C2.tif	5	1
8	LLOMe_90x1 - E_V4_dsRed_SorMC_Sorb.Project Maximum Z_XY1637760564_Z0_T00_C2.tif	10	1
9	LLOMe_90x1 - E_V4_dsRed_SorMC_Sorb.Project Maximum Z_XY1637760564_Z0_T00_C2.tif	8	1
10	LLOMe_90x1 - E_V4_dsRed_SorMC_Sorb.Project Maximum Z_XY1637760564_Z0_T00_C2.tif	6	1
11	LLOMe_90x1 - E_V4_dsRed_SorMC_Sorb.Project Maximum Z_XY1637760564_Z0_T00_C2.tif	16	1
12	LLOMe_90x1 - E_V4_dsRed_SorMC_Sorb.Project Maximum Z_XY1637760564_Z0_T00_C2.tif	18	1
13	LLOMe_90x1 - E_V4_dsRed_SorMC_Sorb.Project Maximum Z_XY1637760564_Z0_T00_C2.tif	20	1
14	LLOMe_90x1 - E_V4_dsRed_SorMC_Sorb.Project Maximum Z_XY1637760564_Z0_T00_C2.tif	36	1
15	LLOMe_90x1 - E_V4_dsRed_SorMC_Sorb.Project Maximum Z_XY1637760564_Z0_T00_C2.tif	32	1
16	LLOMe_90x1 - E_V4_dsRed_SorMC_Sorb.Project Maximum Z_XY1637760564_Z0_T00_C2.tif	32	1
17	LLOMe_90x1 - E_V4_dsRed_SorMC_Sorb.Project Maximum Z_XY1637760564_Z0_T00_C2.tif	35	1
18	LLOMe_90x1 - E_V4_dsRed_SorMC_Sorb.Project Maximum Z_XY1637760564_Z0_T00_C2.tif	34	1
19	LLOMe_90x1 - E_V4_dsRed_SorMC_Sorb.Project Maximum Z_XY1637760564_Z0_T00_C2.tif	35	1
20	LLOMe_90x1 - E_V4_dsRed_SorMC_Sorb.Project Maximum Z_XY1637760564_Z0_T00_C2.tif	39	1
21	LLOMe_90x1 - E_V4_dsRed_SorMC_Sorb.Project Maximum Z_XY1637760564_Z0_T00_C2.tif	38	1
22	LLOMe_90x1 - E_V4_dsRed_SorMC_Sorb.Project Maximum Z_XY1637760564_Z0_T00_C2.tif	30	1
23	LLOMe_90x1 - E_V4_dsRed_SorMC_Sorb.Project Maximum Z_XY1637760564_Z0_T00_C2.tif	41	1
24	LLOMe_90x1 - E_V4_dsRed_SorMC_Sorb.Project Maximum Z_XY1637760564_Z0_T00_C2.tif	48	1
25	LLOMe_90x1 - E_V4_dsRed_SorMC_Sorb.Project Maximum Z_XY1637760564_Z0_T00_C2.tif	39	1
26	LLOMe_90x1 - E_V4_dsRed_SorMC_Sorb.Project Maximum Z_XY1637760564_Z0_T00_C2.tif	40	1
27	LLOMe_90x1 - E_V4_dsRed_SorMC_Sorb.Project Maximum Z_XY1637760564_Z0_T00_C2.tif	47	1
28	LLOMe_90x1 - E_V4_dsRed_SorMC_Sorb.Project Maximum Z_XY1637760564_Z0_T00_C2.tif	39	1
29	LLOMe_90x1 - E_V4_dsRed_SorMC_Sorb.Project Maximum Z_XY1637760564_Z0_T00_C2.tif	48	1
30	LLOMe_90x1 - E_V4_dsRed_SorMC_Sorb.Project Maximum Z_XY1637760564_Z0_T00_C2.tif	46	1
31	LLOMe_90x1 - E_V4_dsRed_SorMC_Sorb.Project Maximum Z_XY1637760564_Z0_T00_C2.tif	43	1
32	LLOMe_90x1 - E_V4_dsRed_SorMC_Sorb.Project Maximum Z_XY1637760564_Z0_T00_C2.tif	38	1
33	LLOMe_90x1 - E_V4_dsRed_SorMC_Sorb.Project Maximum Z_XY1637760564_Z0_T00_C2.tif	49	1
34	LLOMe_90x1 - E_V4_dsRed_SorMC_Sorb.Project Maximum Z_XY1637760564_Z0_T00_C2.tif	46	1
35	LLOMe_90x1 - E_V4_dsRed_SorMC_Sorb.Project Maximum Z_XY1637760564_Z0_T00_C2.tif	45	1
36	LLOMe_90x1 - E_V4_dsRed_SorMC_Sorb.Project Maximum Z_XY1637760564_Z0_T00_C2.tif	47	1
37	LLOMe_90x1 - E_V4_dsRed_SorMC_Sorb.Project Maximum Z_XY1637760564_Z0_T00_C2.tif	49	1
38	LLOMe_90x1 - E_V4_dsRed_SorMC_Sorb.Project Maximum Z_XY1637760564_Z0_T00_C2.tif	50	1
39	LLOMe_90x1 - E_V4_dsRed_SorMC_Sorb.Project Maximum Z_XY1637760564_Z0_T00_C2.tif	42	1
40	LLOMe_90x1 - E_V4_dsRed_SorMC_Sorb.Project Maximum Z_XY1637760564_Z0_T00_C2.tif	42	1
41	LLOMe_90x1 - E_V4_dsRed_SorMC_Sorb.Project Maximum Z_XY1637760564_Z0_T00_C2.tif	40	1
42	LLOMe_90x1 - E_V4_dsRed_SorMC_Sorb.Project Maximum Z_XY1637760564_Z0_T00_C2.tif	50	1
43	LLOMe_90x1 - E_V4_dsRed_SorMC_Sorb.Project Maximum Z_XY1637760564_Z0_T00_C2.tif	48	1
44	LLOMe_90x1 - E_V4_dsRed_SorMC_Sorb.Project Maximum Z_XY1637760564_Z0_T00_C2.tif	56	1
45	LLOMe_90x1 - E_V4_dsRed_SorMC_Sorb.Project Maximum Z_XY1637760564_Z0_T00_C2.tif	55	1
46	LLOMe_90x1 - E_V4_dsRed_SorMC_Sorb.Project Maximum Z_XY1637760564_Z0_T00_C2.tif	45	1
47	LLOMe_90x1 - E_V4_dsRed_SorMC_Sorb.Project Maximum Z_XY1637760564_Z0_T00_C2.tif	57	1
48	LLOMe_90x1 - E_V4_dsRed_SorMC_Sorb.Project Maximum Z_XY1637760564_Z0_T00_C2.tif	61	1
49	LLOMe_90x1 - E_V4_dsRed_SorMC_Sorb.Project Maximum Z_XY1637760564_Z0_T00_C2.tif	58	1
50	LLOMe_90x1 - E_V4_dsRed_SorMC_Sorb.Project Maximum Z_XY1637760564_Z0_T00_C2.tif	49	1
51	LLOMe_90x1 - E_V4_dsRed_SorMC_Sorb.Project Maximum Z_XY1637760564_Z0_T00_C2.tif	46	1
52	LLOMe_90x1 - E_V4_dsRed_SorMC_Sorb.Project Maximum Z_XY1637760564_Z0_T00_C2.tif	55	1
53	LLOMe_90x1 - E_V4_dsRed_SorMC_Sorb.Project Maximum Z_XY1637760564_Z0_T00_C2.tif	52	1
54	LLOMe_90x1 - E_V4_dsRed_SorMC_Sorb.Project Maximum Z_XY1637760564_Z0_T00_C2.tif	57	1
55	LLOMe_90x1 - E_V4_dsRed_SorMC_Sorb.Project Maximum Z_XY1637760564_Z0_T00_C2.tif	65	1
56	LLOMe_90x1 - E_V4_dsRed_SorMC_Sorb.Project Maximum Z_XY1637760564_Z0_T00_C2.tif	59	1
57	LLOMe_90x1 - E_V4_dsRed_SorMC_Sorb.Project Maximum Z_XY1637760564_Z0_T00_C2.tif	49	1
58	LLOMe_90x1 - E_V4_dsRed_SorMC_Sorb.Project Maximum Z_XY1637760564_Z0_T00_C2.tif	63	1
59	LLOMe_90x1 - E_V4_dsRed_SorMC_Sorb.Project Maximum Z_XY1637760564_Z0_T00_C2.tif	60	1
60	LLOMe_90x1 - E_V4_dsRed_SorMC_Sorb.Project Maximum Z_XY1637760564_Z0_T00_C2.tif	67	1
61	LLOMe_90x1 - E_V4_dsRed_SorMC_Sorb.Project Maximum Z_XY1637760564_Z0_T00_C2.tif	67	1
62	LLOMe_90x1 - E_V4_dsRed_SorMC_Sorb.Project Maximum Z_XY1637760564_Z0_T00_C2.tif	67	1
63	LLOMe_90x1 - E_V4_dsRed_SorMC_Sorb.Project Maximum Z_XY1637760564_Z0_T00_C2.tif	72	1
64	LLOMe_90x1 - E_V4_dsRed_SorMC_Sorb.Project Maximum Z_XY1637760564_Z0_T00_C2.tif	50	1
65	LLOMe_90x1 - E_V4_dsRed_SorMC_Sorb.Project Maximum Z_XY1637760564_Z0_T00_C2.tif	59	1
66	LLOMe_90x1 - E_V4_dsRed_SorMC_Sorb.Project Maximum Z_XY1637760564_Z0_T00_C2.tif	52	1
67	LLOMe_90x1 - E_V4_dsRed_SorMC_Sorb.Project Maximum Z_XY1637760564_Z0_T00_C2.tif	49	1
68	LLOMe_90x1 - E_V4_dsRed_SorMC_Sorb.Project Maximum Z_XY1637760564_Z0_T00_C2.tif	52	1
69	LLOMe_90x1 - E_V4_dsRed_SorMC_Sorb.Project Maximum Z_XY1637760564_Z0_T00_C2.tif	54	1
70	LLOMe_90x1 - E_V4_dsRed_SorMC_Sorb.Project Maximum Z_XY1637760564_Z0_T00_C2.tif	51	1
71	LLOMe_90x1 - E_V4_dsRed_SorMC_Sorb.Project Maximum Z_XY1637760564_Z0_T00_C2.tif	58	1
72	LLOMe_90x1 - E_V4_dsRed_SorMC_Sorb.Project Maximum Z_XY1637760564_Z0_T00_C2.tif	52	1
73	LLOMe_90x1 - E_V4_dsRed_SorMC_Sorb.Project Maximum Z_XY1637760564_Z0_T00_C2.tif	51	1
74	LLOMe_90x1 - E_V4_dsRed_SorMC_Sorb.Project Maximum Z_XY1637760564_Z0_T00_C2.tif	61	1
75	LLOMe_90x1 - E_V4_dsRed_SorMC_Sorb.Project Maximum Z_XY1637760564_Z0_T00_C2.tif	65	1
76	LLOMe_90x1 - E_V4_dsRed_SorMC_Sorb.Project Maximum Z_XY1637760564_Z0_T00_C2.tif	55	1
77	LLOMe_90x1 - E_V4_dsRed_SorMC_Sorb.Project Maximum Z_XY1637760564_Z0_T00_C2.tif	57	1
78	LLOMe_90x1 - E_V4_dsRed_SorMC_Sorb.Project Maximum Z_XY1637760564_Z0_T00_C2.tif	63	1
79	LLOMe_90x1 - E_V4_dsRed_SorMC_Sorb.Project Maximum Z_XY1637760564_Z0_T00_C2.tif	61	1
80	LLOMe_90x1 - E_V4_dsRed_SorMC_Sorb.Project Maximum Z_XY1637760564_Z0_T00_C2.tif	53	1
81	LLOMe_90x1 - E_V4_dsRed_SorMC_Sorb.Project Maximum Z_XY1637760564_Z0_T00_C2.tif	46	1
82	LLOMe_90x1 - E_V4_dsRed_SorMC_Sorb.Project Maximum Z_XY1637760564_Z0_T00_C2.tif	61	1
83	LLOMe_90x1 - E_V4_dsRed_SorMC_Sorb.Project Maximum Z_XY1637760564_Z0_T00_C2.tif	69	1
84	LLOMe_90x1 - E_V4_dsRed_SorMC_Sorb.Project Maximum Z_XY1637760564_Z0_T00_C2.tif	55	1
85	LLOMe_90x1 - E_V4_dsRed_SorMC_Sorb.Project Maximum Z_XY1637760564_Z0_T00_C2.tif	47	1
86	LLOMe_90x1 - E_V4_dsRed_SorMC_Sorb.Project Maximum Z_XY1637760564_Z0_T00_C2.tif	62	1
87	LLOMe_90x1 - E_V4_dsRed_SorMC_Sorb.Project Maximum Z_XY1637760564_Z0_T00_C2.tif	55	1
88	LLOMe_90x1 - E_V4_dsRed_SorMC_Sorb.Project Maximum Z_XY1637760564_Z0_T00_C2.tif	56	1
89	LLOMe_90x1 - E_V4_dsRed_SorMC_Sorb.Project Maximum Z_XY1637760564_Z0_T00_C2.tif	63	1
90	LLOMe_90x1 - E_V4_dsRed_SorMC_Sorb.Project Maximum Z_XY1637760564_Z0_T00_C2.tif	57	1
0	LLOMe_90x1 - E_V4_dsRed_SorMC_Sorb - 1.Project Maximum Z_XY1637760565_Z0_T00_C1.tif	3	2
1	LLOMe_90x1 - E_V4_dsRed_SorMC_Sorb - 1.Project Maximum Z_XY1637760565_Z0_T00_C1.tif	1	2
2	LLOMe_90x1 - E_V4_dsRed_SorMC_Sorb - 1.Project Maximum Z_XY1637760565_Z0_T00_C1.tif	2	2
3	LLOMe_90x1 - E_V4_dsRed_SorMC_Sorb - 1.Project Maximum Z_XY1637760565_Z0_T00_C1.tif	1	2
4	LLOMe_90x1 - E_V4_dsRed_SorMC_Sorb - 1.Project Maximum Z_XY1637760565_Z0_T00_C1.tif	0	2
5	LLOMe_90x1 - E_V4_dsRed_SorMC_Sorb - 1.Project Maximum Z_XY1637760565_Z0_T00_C1.tif	1	2
6	LLOMe_90x1 - E_V4_dsRed_SorMC_Sorb - 1.Project Maximum Z_XY1637760565_Z0_T00_C1.tif	2	2
7	LLOMe_90x1 - E_V4_dsRed_SorMC_Sorb - 1.Project Maximum Z_XY1637760565_Z0_T00_C1.tif	3	2
8	LLOMe_90x1 - E_V4_dsRed_SorMC_Sorb - 1.Project Maximum Z_XY1637760565_Z0_T00_C1.tif	3	2
9	LLOMe_90x1 - E_V4_dsRed_SorMC_Sorb - 1.Project Maximum Z_XY1637760565_Z0_T00_C1.tif	3	2
10	LLOMe_90x1 - E_V4_dsRed_SorMC_Sorb - 1.Project Maximum Z_XY1637760565_Z0_T00_C1.tif	7	2
11	LLOMe_90x1 - E_V4_dsRed_SorMC_Sorb - 1.Project Maximum Z_XY1637760565_Z0_T00_C1.tif	9	2
12	LLOMe_90x1 - E_V4_dsRed_SorMC_Sorb - 1.Project Maximum Z_XY1637760565_Z0_T00_C1.tif	16	2
13	LLOMe_90x1 - E_V4_dsRed_SorMC_Sorb - 1.Project Maximum Z_XY1637760565_Z0_T00_C1.tif	12	2
14	LLOMe_90x1 - E_V4_dsRed_SorMC_Sorb - 1.Project Maximum Z_XY1637760565_Z0_T00_C1.tif	16	2
15	LLOMe_90x1 - E_V4_dsRed_SorMC_Sorb - 1.Project Maximum Z_XY1637760565_Z0_T00_C1.tif	13	2
16	LLOMe_90x1 - E_V4_dsRed_SorMC_Sorb - 1.Project Maximum Z_XY1637760565_Z0_T00_C1.tif	11	2
17	LLOMe_90x1 - E_V4_dsRed_SorMC_Sorb - 1.Project Maximum Z_XY1637760565_Z0_T00_C1.tif	8	2
18	LLOMe_90x1 - E_V4_dsRed_SorMC_Sorb - 1.Project Maximum Z_XY1637760565_Z0_T00_C1.tif	17	2
19	LLOMe_90x1 - E_V4_dsRed_SorMC_Sorb - 1.Project Maximum Z_XY1637760565_Z0_T00_C1.tif	16	2
20	LLOMe_90x1 - E_V4_dsRed_SorMC_Sorb - 1.Project Maximum Z_XY1637760565_Z0_T00_C1.tif	17	2
21	LLOMe_90x1 - E_V4_dsRed_SorMC_Sorb - 1.Project Maximum Z_XY1637760565_Z0_T00_C1.tif	9	2
22	LLOMe_90x1 - E_V4_dsRed_SorMC_Sorb - 1.Project Maximum Z_XY1637760565_Z0_T00_C1.tif	14	2
23	LLOMe_90x1 - E_V4_dsRed_SorMC_Sorb - 1.Project Maximum Z_XY1637760565_Z0_T00_C1.tif	14	2
24	LLOMe_90x1 - E_V4_dsRed_SorMC_Sorb - 1.Project Maximum Z_XY1637760565_Z0_T00_C1.tif	15	2
25	LLOMe_90x1 - E_V4_dsRed_SorMC_Sorb - 1.Project Maximum Z_XY1637760565_Z0_T00_C1.tif	12	2
26	LLOMe_90x1 - E_V4_dsRed_SorMC_Sorb - 1.Project Maximum Z_XY1637760565_Z0_T00_C1.tif	15	2
27	LLOMe_90x1 - E_V4_dsRed_SorMC_Sorb - 1.Project Maximum Z_XY1637760565_Z0_T00_C1.tif	19	2
28	LLOMe_90x1 - E_V4_dsRed_SorMC_Sorb - 1.Project Maximum Z_XY1637760565_Z0_T00_C1.tif	22	2
29	LLOMe_90x1 - E_V4_dsRed_SorMC_Sorb - 1.Project Maximum Z_XY1637760565_Z0_T00_C1.tif	13	2
30	LLOMe_90x1 - E_V4_dsRed_SorMC_Sorb - 1.Project Maximum Z_XY1637760565_Z0_T00_C1.tif	24	2
31	LLOMe_90x1 - E_V4_dsRed_SorMC_Sorb - 1.Project Maximum Z_XY1637760565_Z0_T00_C1.tif	17	2
32	LLOMe_90x1 - E_V4_dsRed_SorMC_Sorb - 1.Project Maximum Z_XY1637760565_Z0_T00_C1.tif	20	2
33	LLOMe_90x1 - E_V4_dsRed_SorMC_Sorb - 1.Project Maximum Z_XY1637760565_Z0_T00_C1.tif	21	2
34	LLOMe_90x1 - E_V4_dsRed_SorMC_Sorb - 1.Project Maximum Z_XY1637760565_Z0_T00_C1.tif	23	2
35	LLOMe_90x1 - E_V4_dsRed_SorMC_Sorb - 1.Project Maximum Z_XY1637760565_Z0_T00_C1.tif	12	2
36	LLOMe_90x1 - E_V4_dsRed_SorMC_Sorb - 1.Project Maximum Z_XY1637760565_Z0_T00_C1.tif	19	2
37	LLOMe_90x1 - E_V4_dsRed_SorMC_Sorb - 1.Project Maximum Z_XY1637760565_Z0_T00_C1.tif	19	2
38	LLOMe_90x1 - E_V4_dsRed_SorMC_Sorb - 1.Project Maximum Z_XY1637760565_Z0_T00_C1.tif	20	2
39	LLOMe_90x1 - E_V4_dsRed_SorMC_Sorb - 1.Project Maximum Z_XY1637760565_Z0_T00_C1.tif	20	2
40	LLOMe_90x1 - E_V4_dsRed_SorMC_Sorb - 1.Project Maximum Z_XY1637760565_Z0_T00_C1.tif	17	2
41	LLOMe_90x1 - E_V4_dsRed_SorMC_Sorb - 1.Project Maximum Z_XY1637760565_Z0_T00_C1.tif	20	2
42	LLOMe_90x1 - E_V4_dsRed_SorMC_Sorb - 1.Project Maximum Z_XY1637760565_Z0_T00_C1.tif	25	2
43	LLOMe_90x1 - E_V4_dsRed_SorMC_Sorb - 1.Project Maximum Z_XY1637760565_Z0_T00_C1.tif	17	2
44	LLOMe_90x1 - E_V4_dsRed_SorMC_Sorb - 1.Project Maximum Z_XY1637760565_Z0_T00_C1.tif	22	2
45	LLOMe_90x1 - E_V4_dsRed_SorMC_Sorb - 1.Project Maximum Z_XY1637760565_Z0_T00_C1.tif	14	2
46	LLOMe_90x1 - E_V4_dsRed_SorMC_Sorb - 1.Project Maximum Z_XY1637760565_Z0_T00_C1.tif	19	2
47	LLOMe_90x1 - E_V4_dsRed_SorMC_Sorb - 1.Project Maximum Z_XY1637760565_Z0_T00_C1.tif	14	2
48	LLOMe_90x1 - E_V4_dsRed_SorMC_Sorb - 1.Project Maximum Z_XY1637760565_Z0_T00_C1.tif	19	2
49	LLOMe_90x1 - E_V4_dsRed_SorMC_Sorb - 1.Project Maximum Z_XY1637760565_Z0_T00_C1.tif	17	2
50	LLOMe_90x1 - E_V4_dsRed_SorMC_Sorb - 1.Project Maximum Z_XY1637760565_Z0_T00_C1.tif	20	2
51	LLOMe_90x1 - E_V4_dsRed_SorMC_Sorb - 1.Project Maximum Z_XY1637760565_Z0_T00_C1.tif	19	2
52	LLOMe_90x1 - E_V4_dsRed_SorMC_Sorb - 1.Project Maximum Z_XY1637760565_Z0_T00_C1.tif	18	2
53	LLOMe_90x1 - E_V4_dsRed_SorMC_Sorb - 1.Project Maximum Z_XY1637760565_Z0_T00_C1.tif	24	2
54	LLOMe_90x1 - E_V4_dsRed_SorMC_Sorb - 1.Project Maximum Z_XY1637760565_Z0_T00_C1.tif	23	2
55	LLOMe_90x1 - E_V4_dsRed_SorMC_Sorb - 1.Project Maximum Z_XY1637760565_Z0_T00_C1.tif	21	2
56	LLOMe_90x1 - E_V4_dsRed_SorMC_Sorb - 1.Project Maximum Z_XY1637760565_Z0_T00_C1.tif	20	2
57	LLOMe_90x1 - E_V4_dsRed_SorMC_Sorb - 1.Project Maximum Z_XY1637760565_Z0_T00_C1.tif	20	2
58	LLOMe_90x1 - E_V4_dsRed_SorMC_Sorb - 1.Project Maximum Z_XY1637760565_Z0_T00_C1.tif	23	2
59	LLOMe_90x1 - E_V4_dsRed_SorMC_Sorb - 1.Project Maximum Z_XY1637760565_Z0_T00_C1.tif	18	2
60	LLOMe_90x1 - E_V4_dsRed_SorMC_Sorb - 1.Project Maximum Z_XY1637760565_Z0_T00_C1.tif	23	2
61	LLOMe_90x1 - E_V4_dsRed_SorMC_Sorb - 1.Project Maximum Z_XY1637760565_Z0_T00_C1.tif	30	2
62	LLOMe_90x1 - E_V4_dsRed_SorMC_Sorb - 1.Project Maximum Z_XY1637760565_Z0_T00_C1.tif	25	2
63	LLOMe_90x1 - E_V4_dsRed_SorMC_Sorb - 1.Project Maximum Z_XY1637760565_Z0_T00_C1.tif	22	2
64	LLOMe_90x1 - E_V4_dsRed_SorMC_Sorb - 1.Project Maximum Z_XY1637760565_Z0_T00_C1.tif	23	2
65	LLOMe_90x1 - E_V4_dsRed_SorMC_Sorb - 1.Project Maximum Z_XY1637760565_Z0_T00_C1.tif	22	2
66	LLOMe_90x1 - E_V4_dsRed_SorMC_Sorb - 1.Project Maximum Z_XY1637760565_Z0_T00_C1.tif	29	2
67	LLOMe_90x1 - E_V4_dsRed_SorMC_Sorb - 1.Project Maximum Z_XY1637760565_Z0_T00_C1.tif	21	2
68	LLOMe_90x1 - E_V4_dsRed_SorMC_Sorb - 1.Project Maximum Z_XY1637760565_Z0_T00_C1.tif	21	2
69	LLOMe_90x1 - E_V4_dsRed_SorMC_Sorb - 1.Project Maximum Z_XY1637760565_Z0_T00_C1.tif	18	2
70	LLOMe_90x1 - E_V4_dsRed_SorMC_Sorb - 1.Project Maximum Z_XY1637760565_Z0_T00_C1.tif	18	2
71	LLOMe_90x1 - E_V4_dsRed_SorMC_Sorb - 1.Project Maximum Z_XY1637760565_Z0_T00_C1.tif	25	2
72	LLOMe_90x1 - E_V4_dsRed_SorMC_Sorb - 1.Project Maximum Z_XY1637760565_Z0_T00_C1.tif	29	2
73	LLOMe_90x1 - E_V4_dsRed_SorMC_Sorb - 1.Project Maximum Z_XY1637760565_Z0_T00_C1.tif	25	2
74	LLOMe_90x1 - E_V4_dsRed_SorMC_Sorb - 1.Project Maximum Z_XY1637760565_Z0_T00_C1.tif	18	2
75	LLOMe_90x1 - E_V4_dsRed_SorMC_Sorb - 1.Project Maximum Z_XY1637760565_Z0_T00_C1.tif	21	2
76	LLOMe_90x1 - E_V4_dsRed_SorMC_Sorb - 1.Project Maximum Z_XY1637760565_Z0_T00_C1.tif	17	2
77	LLOMe_90x1 - E_V4_dsRed_SorMC_Sorb - 1.Project Maximum Z_XY1637760565_Z0_T00_C1.tif	25	2
78	LLOMe_90x1 - E_V4_dsRed_SorMC_Sorb - 1.Project Maximum Z_XY1637760565_Z0_T00_C1.tif	22	2
79	LLOMe_90x1 - E_V4_dsRed_SorMC_Sorb - 1.Project Maximum Z_XY1637760565_Z0_T00_C1.tif	28	2
80	LLOMe_90x1 - E_V4_dsRed_SorMC_Sorb - 1.Project Maximum Z_XY1637760565_Z0_T00_C1.tif	16	2
81	LLOMe_90x1 - E_V4_dsRed_SorMC_Sorb - 1.Project Maximum Z_XY1637760565_Z0_T00_C1.tif	19	2
82	LLOMe_90x1 - E_V4_dsRed_SorMC_Sorb - 1.Project Maximum Z_XY1637760565_Z0_T00_C1.tif	21	2
83	LLOMe_90x1 - E_V4_dsRed_SorMC_Sorb - 1.Project Maximum Z_XY1637760565_Z0_T00_C1.tif	18	2
84	LLOMe_90x1 - E_V4_dsRed_SorMC_Sorb - 1.Project Maximum Z_XY1637760565_Z0_T00_C1.tif	27	2
85	LLOMe_90x1 - E_V4_dsRed_SorMC_Sorb - 1.Project Maximum Z_XY1637760565_Z0_T00_C1.tif	17	2
86	LLOMe_90x1 - E_V4_dsRed_SorMC_Sorb - 1.Project Maximum Z_XY1637760565_Z0_T00_C1.tif	19	2
87	LLOMe_90x1 - E_V4_dsRed_SorMC_Sorb - 1.Project Maximum Z_XY1637760565_Z0_T00_C1.tif	20	2
88	LLOMe_90x1 - E_V4_dsRed_SorMC_Sorb - 1.Project Maximum Z_XY1637760565_Z0_T00_C1.tif	21	2
89	LLOMe_90x1 - E_V4_dsRed_SorMC_Sorb - 1.Project Maximum Z_XY1637760565_Z0_T00_C1.tif	20	2
90	LLOMe_90x1 - E_V4_dsRed_SorMC_Sorb - 1.Project Maximum Z_XY1637760565_Z0_T00_C1.tif	23	2
0	LLOMe_90x1 - E_V4_dsRed_SorMC_Sorb - 1.Project Maximum Z_XY1637760565_Z0_T00_C2.tif	7	2
1	LLOMe_90x1 - E_V4_dsRed_SorMC_Sorb - 1.Project Maximum Z_XY1637760565_Z0_T00_C2.tif	19	2
2	LLOMe_90x1 - E_V4_dsRed_SorMC_Sorb - 1.Project Maximum Z_XY1637760565_Z0_T00_C2.tif	21	2
3	LLOMe_90x1 - E_V4_dsRed_SorMC_Sorb - 1.Project Maximum Z_XY1637760565_Z0_T00_C2.tif	21	2
4	LLOMe_90x1 - E_V4_dsRed_SorMC_Sorb - 1.Project Maximum Z_XY1637760565_Z0_T00_C2.tif	13	2
5	LLOMe_90x1 - E_V4_dsRed_SorMC_Sorb - 1.Project Maximum Z_XY1637760565_Z0_T00_C2.tif	14	2
6	LLOMe_90x1 - E_V4_dsRed_SorMC_Sorb - 1.Project Maximum Z_XY1637760565_Z0_T00_C2.tif	13	2
7	LLOMe_90x1 - E_V4_dsRed_SorMC_Sorb - 1.Project Maximum Z_XY1637760565_Z0_T00_C2.tif	12	2
8	LLOMe_90x1 - E_V4_dsRed_SorMC_Sorb - 1.Project Maximum Z_XY1637760565_Z0_T00_C2.tif	13	2
9	LLOMe_90x1 - E_V4_dsRed_SorMC_Sorb - 1.Project Maximum Z_XY1637760565_Z0_T00_C2.tif	12	2
10	LLOMe_90x1 - E_V4_dsRed_SorMC_Sorb - 1.Project Maximum Z_XY1637760565_Z0_T00_C2.tif	18	2
11	LLOMe_90x1 - E_V4_dsRed_SorMC_Sorb - 1.Project Maximum Z_XY1637760565_Z0_T00_C2.tif	21	2
12	LLOMe_90x1 - E_V4_dsRed_SorMC_Sorb - 1.Project Maximum Z_XY1637760565_Z0_T00_C2.tif	21	2
13	LLOMe_90x1 - E_V4_dsRed_SorMC_Sorb - 1.Project Maximum Z_XY1637760565_Z0_T00_C2.tif	21	2
14	LLOMe_90x1 - E_V4_dsRed_SorMC_Sorb - 1.Project Maximum Z_XY1637760565_Z0_T00_C2.tif	35	2
15	LLOMe_90x1 - E_V4_dsRed_SorMC_Sorb - 1.Project Maximum Z_XY1637760565_Z0_T00_C2.tif	27	2
16	LLOMe_90x1 - E_V4_dsRed_SorMC_Sorb - 1.Project Maximum Z_XY1637760565_Z0_T00_C2.tif	38	2
17	LLOMe_90x1 - E_V4_dsRed_SorMC_Sorb - 1.Project Maximum Z_XY1637760565_Z0_T00_C2.tif	39	2
18	LLOMe_90x1 - E_V4_dsRed_SorMC_Sorb - 1.Project Maximum Z_XY1637760565_Z0_T00_C2.tif	29	2
19	LLOMe_90x1 - E_V4_dsRed_SorMC_Sorb - 1.Project Maximum Z_XY1637760565_Z0_T00_C2.tif	51	2
20	LLOMe_90x1 - E_V4_dsRed_SorMC_Sorb - 1.Project Maximum Z_XY1637760565_Z0_T00_C2.tif	63	2
21	LLOMe_90x1 - E_V4_dsRed_SorMC_Sorb - 1.Project Maximum Z_XY1637760565_Z0_T00_C2.tif	45	2
22	LLOMe_90x1 - E_V4_dsRed_SorMC_Sorb - 1.Project Maximum Z_XY1637760565_Z0_T00_C2.tif	50	2
23	LLOMe_90x1 - E_V4_dsRed_SorMC_Sorb - 1.Project Maximum Z_XY1637760565_Z0_T00_C2.tif	52	2
24	LLOMe_90x1 - E_V4_dsRed_SorMC_Sorb - 1.Project Maximum Z_XY1637760565_Z0_T00_C2.tif	53	2
25	LLOMe_90x1 - E_V4_dsRed_SorMC_Sorb - 1.Project Maximum Z_XY1637760565_Z0_T00_C2.tif	51	2
26	LLOMe_90x1 - E_V4_dsRed_SorMC_Sorb - 1.Project Maximum Z_XY1637760565_Z0_T00_C2.tif	51	2
27	LLOMe_90x1 - E_V4_dsRed_SorMC_Sorb - 1.Project Maximum Z_XY1637760565_Z0_T00_C2.tif	52	2
28	LLOMe_90x1 - E_V4_dsRed_SorMC_Sorb - 1.Project Maximum Z_XY1637760565_Z0_T00_C2.tif	57	2
29	LLOMe_90x1 - E_V4_dsRed_SorMC_Sorb - 1.Project Maximum Z_XY1637760565_Z0_T00_C2.tif	50	2
30	LLOMe_90x1 - E_V4_dsRed_SorMC_Sorb - 1.Project Maximum Z_XY1637760565_Z0_T00_C2.tif	49	2
31	LLOMe_90x1 - E_V4_dsRed_SorMC_Sorb - 1.Project Maximum Z_XY1637760565_Z0_T00_C2.tif	56	2
32	LLOMe_90x1 - E_V4_dsRed_SorMC_Sorb - 1.Project Maximum Z_XY1637760565_Z0_T00_C2.tif	49	2
33	LLOMe_90x1 - E_V4_dsRed_SorMC_Sorb - 1.Project Maximum Z_XY1637760565_Z0_T00_C2.tif	51	2
34	LLOMe_90x1 - E_V4_dsRed_SorMC_Sorb - 1.Project Maximum Z_XY1637760565_Z0_T00_C2.tif	51	2
35	LLOMe_90x1 - E_V4_dsRed_SorMC_Sorb - 1.Project Maximum Z_XY1637760565_Z0_T00_C2.tif	47	2
36	LLOMe_90x1 - E_V4_dsRed_SorMC_Sorb - 1.Project Maximum Z_XY1637760565_Z0_T00_C2.tif	43	2
37	LLOMe_90x1 - E_V4_dsRed_SorMC_Sorb - 1.Project Maximum Z_XY1637760565_Z0_T00_C2.tif	48	2
38	LLOMe_90x1 - E_V4_dsRed_SorMC_Sorb - 1.Project Maximum Z_XY1637760565_Z0_T00_C2.tif	48	2
39	LLOMe_90x1 - E_V4_dsRed_SorMC_Sorb - 1.Project Maximum Z_XY1637760565_Z0_T00_C2.tif	43	2
40	LLOMe_90x1 - E_V4_dsRed_SorMC_Sorb - 1.Project Maximum Z_XY1637760565_Z0_T00_C2.tif	47	2
41	LLOMe_90x1 - E_V4_dsRed_SorMC_Sorb - 1.Project Maximum Z_XY1637760565_Z0_T00_C2.tif	52	2
42	LLOMe_90x1 - E_V4_dsRed_SorMC_Sorb - 1.Project Maximum Z_XY1637760565_Z0_T00_C2.tif	44	2
43	LLOMe_90x1 - E_V4_dsRed_SorMC_Sorb - 1.Project Maximum Z_XY1637760565_Z0_T00_C2.tif	48	2
44	LLOMe_90x1 - E_V4_dsRed_SorMC_Sorb - 1.Project Maximum Z_XY1637760565_Z0_T00_C2.tif	60	2
45	LLOMe_90x1 - E_V4_dsRed_SorMC_Sorb - 1.Project Maximum Z_XY1637760565_Z0_T00_C2.tif	53	2
46	LLOMe_90x1 - E_V4_dsRed_SorMC_Sorb - 1.Project Maximum Z_XY1637760565_Z0_T00_C2.tif	60	2
47	LLOMe_90x1 - E_V4_dsRed_SorMC_Sorb - 1.Project Maximum Z_XY1637760565_Z0_T00_C2.tif	56	2
48	LLOMe_90x1 - E_V4_dsRed_SorMC_Sorb - 1.Project Maximum Z_XY1637760565_Z0_T00_C2.tif	63	2
49	LLOMe_90x1 - E_V4_dsRed_SorMC_Sorb - 1.Project Maximum Z_XY1637760565_Z0_T00_C2.tif	49	2
50	LLOMe_90x1 - E_V4_dsRed_SorMC_Sorb - 1.Project Maximum Z_XY1637760565_Z0_T00_C2.tif	51	2
51	LLOMe_90x1 - E_V4_dsRed_SorMC_Sorb - 1.Project Maximum Z_XY1637760565_Z0_T00_C2.tif	46	2
52	LLOMe_90x1 - E_V4_dsRed_SorMC_Sorb - 1.Project Maximum Z_XY1637760565_Z0_T00_C2.tif	67	2
53	LLOMe_90x1 - E_V4_dsRed_SorMC_Sorb - 1.Project Maximum Z_XY1637760565_Z0_T00_C2.tif	57	2
54	LLOMe_90x1 - E_V4_dsRed_SorMC_Sorb - 1.Project Maximum Z_XY1637760565_Z0_T00_C2.tif	56	2
55	LLOMe_90x1 - E_V4_dsRed_SorMC_Sorb - 1.Project Maximum Z_XY1637760565_Z0_T00_C2.tif	63	2
56	LLOMe_90x1 - E_V4_dsRed_SorMC_Sorb - 1.Project Maximum Z_XY1637760565_Z0_T00_C2.tif	49	2
57	LLOMe_90x1 - E_V4_dsRed_SorMC_Sorb - 1.Project Maximum Z_XY1637760565_Z0_T00_C2.tif	56	2
58	LLOMe_90x1 - E_V4_dsRed_SorMC_Sorb - 1.Project Maximum Z_XY1637760565_Z0_T00_C2.tif	56	2
59	LLOMe_90x1 - E_V4_dsRed_SorMC_Sorb - 1.Project Maximum Z_XY1637760565_Z0_T00_C2.tif	50	2
60	LLOMe_90x1 - E_V4_dsRed_SorMC_Sorb - 1.Project Maximum Z_XY1637760565_Z0_T00_C2.tif	54	2
61	LLOMe_90x1 - E_V4_dsRed_SorMC_Sorb - 1.Project Maximum Z_XY1637760565_Z0_T00_C2.tif	49	2
62	LLOMe_90x1 - E_V4_dsRed_SorMC_Sorb - 1.Project Maximum Z_XY1637760565_Z0_T00_C2.tif	47	2
63	LLOMe_90x1 - E_V4_dsRed_SorMC_Sorb - 1.Project Maximum Z_XY1637760565_Z0_T00_C2.tif	48	2
64	LLOMe_90x1 - E_V4_dsRed_SorMC_Sorb - 1.Project Maximum Z_XY1637760565_Z0_T00_C2.tif	48	2
65	LLOMe_90x1 - E_V4_dsRed_SorMC_Sorb - 1.Project Maximum Z_XY1637760565_Z0_T00_C2.tif	53	2
66	LLOMe_90x1 - E_V4_dsRed_SorMC_Sorb - 1.Project Maximum Z_XY1637760565_Z0_T00_C2.tif	54	2
67	LLOMe_90x1 - E_V4_dsRed_SorMC_Sorb - 1.Project Maximum Z_XY1637760565_Z0_T00_C2.tif	40	2
68	LLOMe_90x1 - E_V4_dsRed_SorMC_Sorb - 1.Project Maximum Z_XY1637760565_Z0_T00_C2.tif	39	2
69	LLOMe_90x1 - E_V4_dsRed_SorMC_Sorb - 1.Project Maximum Z_XY1637760565_Z0_T00_C2.tif	46	2
70	LLOMe_90x1 - E_V4_dsRed_SorMC_Sorb - 1.Project Maximum Z_XY1637760565_Z0_T00_C2.tif	49	2
71	LLOMe_90x1 - E_V4_dsRed_SorMC_Sorb - 1.Project Maximum Z_XY1637760565_Z0_T00_C2.tif	45	2
72	LLOMe_90x1 - E_V4_dsRed_SorMC_Sorb - 1.Project Maximum Z_XY1637760565_Z0_T00_C2.tif	55	2
73	LLOMe_90x1 - E_V4_dsRed_SorMC_Sorb - 1.Project Maximum Z_XY1637760565_Z0_T00_C2.tif	52	2
74	LLOMe_90x1 - E_V4_dsRed_SorMC_Sorb - 1.Project Maximum Z_XY1637760565_Z0_T00_C2.tif	54	2
75	LLOMe_90x1 - E_V4_dsRed_SorMC_Sorb - 1.Project Maximum Z_XY1637760565_Z0_T00_C2.tif	50	2
76	LLOMe_90x1 - E_V4_dsRed_SorMC_Sorb - 1.Project Maximum Z_XY1637760565_Z0_T00_C2.tif	43	2
77	LLOMe_90x1 - E_V4_dsRed_SorMC_Sorb - 1.Project Maximum Z_XY1637760565_Z0_T00_C2.tif	48	2
78	LLOMe_90x1 - E_V4_dsRed_SorMC_Sorb - 1.Project Maximum Z_XY1637760565_Z0_T00_C2.tif	51	2
79	LLOMe_90x1 - E_V4_dsRed_SorMC_Sorb - 1.Project Maximum Z_XY1637760565_Z0_T00_C2.tif	59	2
80	LLOMe_90x1 - E_V4_dsRed_SorMC_Sorb - 1.Project Maximum Z_XY1637760565_Z0_T00_C2.tif	45	2
81	LLOMe_90x1 - E_V4_dsRed_SorMC_Sorb - 1.Project Maximum Z_XY1637760565_Z0_T00_C2.tif	61	2
82	LLOMe_90x1 - E_V4_dsRed_SorMC_Sorb - 1.Project Maximum Z_XY1637760565_Z0_T00_C2.tif	55	2
83	LLOMe_90x1 - E_V4_dsRed_SorMC_Sorb - 1.Project Maximum Z_XY1637760565_Z0_T00_C2.tif	52	2
84	LLOMe_90x1 - E_V4_dsRed_SorMC_Sorb - 1.Project Maximum Z_XY1637760565_Z0_T00_C2.tif	46	2
85	LLOMe_90x1 - E_V4_dsRed_SorMC_Sorb - 1.Project Maximum Z_XY1637760565_Z0_T00_C2.tif	53	2
86	LLOMe_90x1 - E_V4_dsRed_SorMC_Sorb - 1.Project Maximum Z_XY1637760565_Z0_T00_C2.tif	54	2
87	LLOMe_90x1 - E_V4_dsRed_SorMC_Sorb - 1.Project Maximum Z_XY1637760565_Z0_T00_C2.tif	45	2
88	LLOMe_90x1 - E_V4_dsRed_SorMC_Sorb - 1.Project Maximum Z_XY1637760565_Z0_T00_C2.tif	53	2
89	LLOMe_90x1 - E_V4_dsRed_SorMC_Sorb - 1.Project Maximum Z_XY1637760565_Z0_T00_C2.tif	62	2
90	LLOMe_90x1 - E_V4_dsRed_SorMC_Sorb - 1.Project Maximum Z_XY1637760565_Z0_T00_C2.tif	62	2
0	LLOMe_90x1 - E_V4_dsRed_E_HL5c - 1.Project Maximum Z_XY1637760563_Z0_T00_C1.tif	29	3
1	LLOMe_90x1 - E_V4_dsRed_E_HL5c - 1.Project Maximum Z_XY1637760563_Z0_T00_C1.tif	32	3
2	LLOMe_90x1 - E_V4_dsRed_E_HL5c - 1.Project Maximum Z_XY1637760563_Z0_T00_C1.tif	28	3
3	LLOMe_90x1 - E_V4_dsRed_E_HL5c - 1.Project Maximum Z_XY1637760563_Z0_T00_C1.tif	24	3
4	LLOMe_90x1 - E_V4_dsRed_E_HL5c - 1.Project Maximum Z_XY1637760563_Z0_T00_C1.tif	28	3
5	LLOMe_90x1 - E_V4_dsRed_E_HL5c - 1.Project Maximum Z_XY1637760563_Z0_T00_C1.tif	36	3
6	LLOMe_90x1 - E_V4_dsRed_E_HL5c - 1.Project Maximum Z_XY1637760563_Z0_T00_C1.tif	24	3
7	LLOMe_90x1 - E_V4_dsRed_E_HL5c - 1.Project Maximum Z_XY1637760563_Z0_T00_C1.tif	37	3
8	LLOMe_90x1 - E_V4_dsRed_E_HL5c - 1.Project Maximum Z_XY1637760563_Z0_T00_C1.tif	50	3
9	LLOMe_90x1 - E_V4_dsRed_E_HL5c - 1.Project Maximum Z_XY1637760563_Z0_T00_C1.tif	53	3
10	LLOMe_90x1 - E_V4_dsRed_E_HL5c - 1.Project Maximum Z_XY1637760563_Z0_T00_C1.tif	66	3
11	LLOMe_90x1 - E_V4_dsRed_E_HL5c - 1.Project Maximum Z_XY1637760563_Z0_T00_C1.tif	78	3
12	LLOMe_90x1 - E_V4_dsRed_E_HL5c - 1.Project Maximum Z_XY1637760563_Z0_T00_C1.tif	47	3
13	LLOMe_90x1 - E_V4_dsRed_E_HL5c - 1.Project Maximum Z_XY1637760563_Z0_T00_C1.tif	62	3
14	LLOMe_90x1 - E_V4_dsRed_E_HL5c - 1.Project Maximum Z_XY1637760563_Z0_T00_C1.tif	70	3
15	LLOMe_90x1 - E_V4_dsRed_E_HL5c - 1.Project Maximum Z_XY1637760563_Z0_T00_C1.tif	88	3
16	LLOMe_90x1 - E_V4_dsRed_E_HL5c - 1.Project Maximum Z_XY1637760563_Z0_T00_C1.tif	67	3
17	LLOMe_90x1 - E_V4_dsRed_E_HL5c - 1.Project Maximum Z_XY1637760563_Z0_T00_C1.tif	64	3
18	LLOMe_90x1 - E_V4_dsRed_E_HL5c - 1.Project Maximum Z_XY1637760563_Z0_T00_C1.tif	69	3
19	LLOMe_90x1 - E_V4_dsRed_E_HL5c - 1.Project Maximum Z_XY1637760563_Z0_T00_C1.tif	72	3
20	LLOMe_90x1 - E_V4_dsRed_E_HL5c - 1.Project Maximum Z_XY1637760563_Z0_T00_C1.tif	78	3
21	LLOMe_90x1 - E_V4_dsRed_E_HL5c - 1.Project Maximum Z_XY1637760563_Z0_T00_C1.tif	74	3
22	LLOMe_90x1 - E_V4_dsRed_E_HL5c - 1.Project Maximum Z_XY1637760563_Z0_T00_C1.tif	76	3
23	LLOMe_90x1 - E_V4_dsRed_E_HL5c - 1.Project Maximum Z_XY1637760563_Z0_T00_C1.tif	61	3
24	LLOMe_90x1 - E_V4_dsRed_E_HL5c - 1.Project Maximum Z_XY1637760563_Z0_T00_C1.tif	56	3
25	LLOMe_90x1 - E_V4_dsRed_E_HL5c - 1.Project Maximum Z_XY1637760563_Z0_T00_C1.tif	59	3
26	LLOMe_90x1 - E_V4_dsRed_E_HL5c - 1.Project Maximum Z_XY1637760563_Z0_T00_C1.tif	63	3
27	LLOMe_90x1 - E_V4_dsRed_E_HL5c - 1.Project Maximum Z_XY1637760563_Z0_T00_C1.tif	56	3
28	LLOMe_90x1 - E_V4_dsRed_E_HL5c - 1.Project Maximum Z_XY1637760563_Z0_T00_C1.tif	56	3
29	LLOMe_90x1 - E_V4_dsRed_E_HL5c - 1.Project Maximum Z_XY1637760563_Z0_T00_C1.tif	41	3
30	LLOMe_90x1 - E_V4_dsRed_E_HL5c - 1.Project Maximum Z_XY1637760563_Z0_T00_C1.tif	47	3
31	LLOMe_90x1 - E_V4_dsRed_E_HL5c - 1.Project Maximum Z_XY1637760563_Z0_T00_C1.tif	61	3
32	LLOMe_90x1 - E_V4_dsRed_E_HL5c - 1.Project Maximum Z_XY1637760563_Z0_T00_C1.tif	51	3
33	LLOMe_90x1 - E_V4_dsRed_E_HL5c - 1.Project Maximum Z_XY1637760563_Z0_T00_C1.tif	50	3
34	LLOMe_90x1 - E_V4_dsRed_E_HL5c - 1.Project Maximum Z_XY1637760563_Z0_T00_C1.tif	56	3
35	LLOMe_90x1 - E_V4_dsRed_E_HL5c - 1.Project Maximum Z_XY1637760563_Z0_T00_C1.tif	58	3
36	LLOMe_90x1 - E_V4_dsRed_E_HL5c - 1.Project Maximum Z_XY1637760563_Z0_T00_C1.tif	43	3
37	LLOMe_90x1 - E_V4_dsRed_E_HL5c - 1.Project Maximum Z_XY1637760563_Z0_T00_C1.tif	50	3
38	LLOMe_90x1 - E_V4_dsRed_E_HL5c - 1.Project Maximum Z_XY1637760563_Z0_T00_C1.tif	49	3
39	LLOMe_90x1 - E_V4_dsRed_E_HL5c - 1.Project Maximum Z_XY1637760563_Z0_T00_C1.tif	56	3
40	LLOMe_90x1 - E_V4_dsRed_E_HL5c - 1.Project Maximum Z_XY1637760563_Z0_T00_C1.tif	45	3
41	LLOMe_90x1 - E_V4_dsRed_E_HL5c - 1.Project Maximum Z_XY1637760563_Z0_T00_C1.tif	45	3
42	LLOMe_90x1 - E_V4_dsRed_E_HL5c - 1.Project Maximum Z_XY1637760563_Z0_T00_C1.tif	40	3
43	LLOMe_90x1 - E_V4_dsRed_E_HL5c - 1.Project Maximum Z_XY1637760563_Z0_T00_C1.tif	52	3
44	LLOMe_90x1 - E_V4_dsRed_E_HL5c - 1.Project Maximum Z_XY1637760563_Z0_T00_C1.tif	48	3
45	LLOMe_90x1 - E_V4_dsRed_E_HL5c - 1.Project Maximum Z_XY1637760563_Z0_T00_C1.tif	52	3
46	LLOMe_90x1 - E_V4_dsRed_E_HL5c - 1.Project Maximum Z_XY1637760563_Z0_T00_C1.tif	49	3
47	LLOMe_90x1 - E_V4_dsRed_E_HL5c - 1.Project Maximum Z_XY1637760563_Z0_T00_C1.tif	49	3
48	LLOMe_90x1 - E_V4_dsRed_E_HL5c - 1.Project Maximum Z_XY1637760563_Z0_T00_C1.tif	49	3
49	LLOMe_90x1 - E_V4_dsRed_E_HL5c - 1.Project Maximum Z_XY1637760563_Z0_T00_C1.tif	54	3
50	LLOMe_90x1 - E_V4_dsRed_E_HL5c - 1.Project Maximum Z_XY1637760563_Z0_T00_C1.tif	49	3
51	LLOMe_90x1 - E_V4_dsRed_E_HL5c - 1.Project Maximum Z_XY1637760563_Z0_T00_C1.tif	56	3
52	LLOMe_90x1 - E_V4_dsRed_E_HL5c - 1.Project Maximum Z_XY1637760563_Z0_T00_C1.tif	48	3
53	LLOMe_90x1 - E_V4_dsRed_E_HL5c - 1.Project Maximum Z_XY1637760563_Z0_T00_C1.tif	53	3
54	LLOMe_90x1 - E_V4_dsRed_E_HL5c - 1.Project Maximum Z_XY1637760563_Z0_T00_C1.tif	51	3
55	LLOMe_90x1 - E_V4_dsRed_E_HL5c - 1.Project Maximum Z_XY1637760563_Z0_T00_C1.tif	49	3
56	LLOMe_90x1 - E_V4_dsRed_E_HL5c - 1.Project Maximum Z_XY1637760563_Z0_T00_C1.tif	43	3
57	LLOMe_90x1 - E_V4_dsRed_E_HL5c - 1.Project Maximum Z_XY1637760563_Z0_T00_C1.tif	48	3
58	LLOMe_90x1 - E_V4_dsRed_E_HL5c - 1.Project Maximum Z_XY1637760563_Z0_T00_C1.tif	38	3
59	LLOMe_90x1 - E_V4_dsRed_E_HL5c - 1.Project Maximum Z_XY1637760563_Z0_T00_C1.tif	59	3
60	LLOMe_90x1 - E_V4_dsRed_E_HL5c - 1.Project Maximum Z_XY1637760563_Z0_T00_C1.tif	48	3
61	LLOMe_90x1 - E_V4_dsRed_E_HL5c - 1.Project Maximum Z_XY1637760563_Z0_T00_C1.tif	37	3
62	LLOMe_90x1 - E_V4_dsRed_E_HL5c - 1.Project Maximum Z_XY1637760563_Z0_T00_C1.tif	39	3
63	LLOMe_90x1 - E_V4_dsRed_E_HL5c - 1.Project Maximum Z_XY1637760563_Z0_T00_C1.tif	40	3
64	LLOMe_90x1 - E_V4_dsRed_E_HL5c - 1.Project Maximum Z_XY1637760563_Z0_T00_C1.tif	50	3
65	LLOMe_90x1 - E_V4_dsRed_E_HL5c - 1.Project Maximum Z_XY1637760563_Z0_T00_C1.tif	47	3
66	LLOMe_90x1 - E_V4_dsRed_E_HL5c - 1.Project Maximum Z_XY1637760563_Z0_T00_C1.tif	41	3
67	LLOMe_90x1 - E_V4_dsRed_E_HL5c - 1.Project Maximum Z_XY1637760563_Z0_T00_C1.tif	44	3
68	LLOMe_90x1 - E_V4_dsRed_E_HL5c - 1.Project Maximum Z_XY1637760563_Z0_T00_C1.tif	39	3
69	LLOMe_90x1 - E_V4_dsRed_E_HL5c - 1.Project Maximum Z_XY1637760563_Z0_T00_C1.tif	37	3
70	LLOMe_90x1 - E_V4_dsRed_E_HL5c - 1.Project Maximum Z_XY1637760563_Z0_T00_C1.tif	39	3
71	LLOMe_90x1 - E_V4_dsRed_E_HL5c - 1.Project Maximum Z_XY1637760563_Z0_T00_C1.tif	41	3
72	LLOMe_90x1 - E_V4_dsRed_E_HL5c - 1.Project Maximum Z_XY1637760563_Z0_T00_C1.tif	49	3
73	LLOMe_90x1 - E_V4_dsRed_E_HL5c - 1.Project Maximum Z_XY1637760563_Z0_T00_C1.tif	33	3
74	LLOMe_90x1 - E_V4_dsRed_E_HL5c - 1.Project Maximum Z_XY1637760563_Z0_T00_C1.tif	39	3
75	LLOMe_90x1 - E_V4_dsRed_E_HL5c - 1.Project Maximum Z_XY1637760563_Z0_T00_C1.tif	46	3
76	LLOMe_90x1 - E_V4_dsRed_E_HL5c - 1.Project Maximum Z_XY1637760563_Z0_T00_C1.tif	40	3
77	LLOMe_90x1 - E_V4_dsRed_E_HL5c - 1.Project Maximum Z_XY1637760563_Z0_T00_C1.tif	49	3
78	LLOMe_90x1 - E_V4_dsRed_E_HL5c - 1.Project Maximum Z_XY1637760563_Z0_T00_C1.tif	43	3
79	LLOMe_90x1 - E_V4_dsRed_E_HL5c - 1.Project Maximum Z_XY1637760563_Z0_T00_C1.tif	38	3
80	LLOMe_90x1 - E_V4_dsRed_E_HL5c - 1.Project Maximum Z_XY1637760563_Z0_T00_C1.tif	46	3
81	LLOMe_90x1 - E_V4_dsRed_E_HL5c - 1.Project Maximum Z_XY1637760563_Z0_T00_C1.tif	41	3
82	LLOMe_90x1 - E_V4_dsRed_E_HL5c - 1.Project Maximum Z_XY1637760563_Z0_T00_C1.tif	46	3
83	LLOMe_90x1 - E_V4_dsRed_E_HL5c - 1.Project Maximum Z_XY1637760563_Z0_T00_C1.tif	46	3
84	LLOMe_90x1 - E_V4_dsRed_E_HL5c - 1.Project Maximum Z_XY1637760563_Z0_T00_C1.tif	55	3
85	LLOMe_90x1 - E_V4_dsRed_E_HL5c - 1.Project Maximum Z_XY1637760563_Z0_T00_C1.tif	32	3
86	LLOMe_90x1 - E_V4_dsRed_E_HL5c - 1.Project Maximum Z_XY1637760563_Z0_T00_C1.tif	42	3
87	LLOMe_90x1 - E_V4_dsRed_E_HL5c - 1.Project Maximum Z_XY1637760563_Z0_T00_C1.tif	63	3
88	LLOMe_90x1 - E_V4_dsRed_E_HL5c - 1.Project Maximum Z_XY1637760563_Z0_T00_C1.tif	44	3
89	LLOMe_90x1 - E_V4_dsRed_E_HL5c - 1.Project Maximum Z_XY1637760563_Z0_T00_C1.tif	53	3
90	LLOMe_90x1 - E_V4_dsRed_E_HL5c - 1.Project Maximum Z_XY1637760563_Z0_T00_C1.tif	50	3
0	LLOMe_90x1 - E_V4_dsRed_E_HL5c - 1.Project Maximum Z_XY1637760563_Z0_T00_C2.tif	18	3
1	LLOMe_90x1 - E_V4_dsRed_E_HL5c - 1.Project Maximum Z_XY1637760563_Z0_T00_C2.tif	14	3
2	LLOMe_90x1 - E_V4_dsRed_E_HL5c - 1.Project Maximum Z_XY1637760563_Z0_T00_C2.tif	18	3
3	LLOMe_90x1 - E_V4_dsRed_E_HL5c - 1.Project Maximum Z_XY1637760563_Z0_T00_C2.tif	17	3
4	LLOMe_90x1 - E_V4_dsRed_E_HL5c - 1.Project Maximum Z_XY1637760563_Z0_T00_C2.tif	28	3
5	LLOMe_90x1 - E_V4_dsRed_E_HL5c - 1.Project Maximum Z_XY1637760563_Z0_T00_C2.tif	28	3
6	LLOMe_90x1 - E_V4_dsRed_E_HL5c - 1.Project Maximum Z_XY1637760563_Z0_T00_C2.tif	26	3
7	LLOMe_90x1 - E_V4_dsRed_E_HL5c - 1.Project Maximum Z_XY1637760563_Z0_T00_C2.tif	37	3
8	LLOMe_90x1 - E_V4_dsRed_E_HL5c - 1.Project Maximum Z_XY1637760563_Z0_T00_C2.tif	45	3
9	LLOMe_90x1 - E_V4_dsRed_E_HL5c - 1.Project Maximum Z_XY1637760563_Z0_T00_C2.tif	34	3
10	LLOMe_90x1 - E_V4_dsRed_E_HL5c - 1.Project Maximum Z_XY1637760563_Z0_T00_C2.tif	41	3
11	LLOMe_90x1 - E_V4_dsRed_E_HL5c - 1.Project Maximum Z_XY1637760563_Z0_T00_C2.tif	43	3
12	LLOMe_90x1 - E_V4_dsRed_E_HL5c - 1.Project Maximum Z_XY1637760563_Z0_T00_C2.tif	30	3
13	LLOMe_90x1 - E_V4_dsRed_E_HL5c - 1.Project Maximum Z_XY1637760563_Z0_T00_C2.tif	33	3
14	LLOMe_90x1 - E_V4_dsRed_E_HL5c - 1.Project Maximum Z_XY1637760563_Z0_T00_C2.tif	34	3
15	LLOMe_90x1 - E_V4_dsRed_E_HL5c - 1.Project Maximum Z_XY1637760563_Z0_T00_C2.tif	42	3
16	LLOMe_90x1 - E_V4_dsRed_E_HL5c - 1.Project Maximum Z_XY1637760563_Z0_T00_C2.tif	41	3
17	LLOMe_90x1 - E_V4_dsRed_E_HL5c - 1.Project Maximum Z_XY1637760563_Z0_T00_C2.tif	38	3
18	LLOMe_90x1 - E_V4_dsRed_E_HL5c - 1.Project Maximum Z_XY1637760563_Z0_T00_C2.tif	42	3
19	LLOMe_90x1 - E_V4_dsRed_E_HL5c - 1.Project Maximum Z_XY1637760563_Z0_T00_C2.tif	36	3
20	LLOMe_90x1 - E_V4_dsRed_E_HL5c - 1.Project Maximum Z_XY1637760563_Z0_T00_C2.tif	45	3
21	LLOMe_90x1 - E_V4_dsRed_E_HL5c - 1.Project Maximum Z_XY1637760563_Z0_T00_C2.tif	44	3
22	LLOMe_90x1 - E_V4_dsRed_E_HL5c - 1.Project Maximum Z_XY1637760563_Z0_T00_C2.tif	47	3
23	LLOMe_90x1 - E_V4_dsRed_E_HL5c - 1.Project Maximum Z_XY1637760563_Z0_T00_C2.tif	45	3
24	LLOMe_90x1 - E_V4_dsRed_E_HL5c - 1.Project Maximum Z_XY1637760563_Z0_T00_C2.tif	34	3
25	LLOMe_90x1 - E_V4_dsRed_E_HL5c - 1.Project Maximum Z_XY1637760563_Z0_T00_C2.tif	29	3
26	LLOMe_90x1 - E_V4_dsRed_E_HL5c - 1.Project Maximum Z_XY1637760563_Z0_T00_C2.tif	33	3
27	LLOMe_90x1 - E_V4_dsRed_E_HL5c - 1.Project Maximum Z_XY1637760563_Z0_T00_C2.tif	44	3
28	LLOMe_90x1 - E_V4_dsRed_E_HL5c - 1.Project Maximum Z_XY1637760563_Z0_T00_C2.tif	37	3
29	LLOMe_90x1 - E_V4_dsRed_E_HL5c - 1.Project Maximum Z_XY1637760563_Z0_T00_C2.tif	31	3
30	LLOMe_90x1 - E_V4_dsRed_E_HL5c - 1.Project Maximum Z_XY1637760563_Z0_T00_C2.tif	42	3
31	LLOMe_90x1 - E_V4_dsRed_E_HL5c - 1.Project Maximum Z_XY1637760563_Z0_T00_C2.tif	36	3
32	LLOMe_90x1 - E_V4_dsRed_E_HL5c - 1.Project Maximum Z_XY1637760563_Z0_T00_C2.tif	29	3
33	LLOMe_90x1 - E_V4_dsRed_E_HL5c - 1.Project Maximum Z_XY1637760563_Z0_T00_C2.tif	40	3
34	LLOMe_90x1 - E_V4_dsRed_E_HL5c - 1.Project Maximum Z_XY1637760563_Z0_T00_C2.tif	30	3
35	LLOMe_90x1 - E_V4_dsRed_E_HL5c - 1.Project Maximum Z_XY1637760563_Z0_T00_C2.tif	30	3
36	LLOMe_90x1 - E_V4_dsRed_E_HL5c - 1.Project Maximum Z_XY1637760563_Z0_T00_C2.tif	41	3
37	LLOMe_90x1 - E_V4_dsRed_E_HL5c - 1.Project Maximum Z_XY1637760563_Z0_T00_C2.tif	37	3
38	LLOMe_90x1 - E_V4_dsRed_E_HL5c - 1.Project Maximum Z_XY1637760563_Z0_T00_C2.tif	39	3
39	LLOMe_90x1 - E_V4_dsRed_E_HL5c - 1.Project Maximum Z_XY1637760563_Z0_T00_C2.tif	32	3
40	LLOMe_90x1 - E_V4_dsRed_E_HL5c - 1.Project Maximum Z_XY1637760563_Z0_T00_C2.tif	27	3
41	LLOMe_90x1 - E_V4_dsRed_E_HL5c - 1.Project Maximum Z_XY1637760563_Z0_T00_C2.tif	42	3
42	LLOMe_90x1 - E_V4_dsRed_E_HL5c - 1.Project Maximum Z_XY1637760563_Z0_T00_C2.tif	34	3
43	LLOMe_90x1 - E_V4_dsRed_E_HL5c - 1.Project Maximum Z_XY1637760563_Z0_T00_C2.tif	38	3
44	LLOMe_90x1 - E_V4_dsRed_E_HL5c - 1.Project Maximum Z_XY1637760563_Z0_T00_C2.tif	38	3
45	LLOMe_90x1 - E_V4_dsRed_E_HL5c - 1.Project Maximum Z_XY1637760563_Z0_T00_C2.tif	43	3
46	LLOMe_90x1 - E_V4_dsRed_E_HL5c - 1.Project Maximum Z_XY1637760563_Z0_T00_C2.tif	37	3
47	LLOMe_90x1 - E_V4_dsRed_E_HL5c - 1.Project Maximum Z_XY1637760563_Z0_T00_C2.tif	37	3
48	LLOMe_90x1 - E_V4_dsRed_E_HL5c - 1.Project Maximum Z_XY1637760563_Z0_T00_C2.tif	36	3
49	LLOMe_90x1 - E_V4_dsRed_E_HL5c - 1.Project Maximum Z_XY1637760563_Z0_T00_C2.tif	46	3
50	LLOMe_90x1 - E_V4_dsRed_E_HL5c - 1.Project Maximum Z_XY1637760563_Z0_T00_C2.tif	42	3
51	LLOMe_90x1 - E_V4_dsRed_E_HL5c - 1.Project Maximum Z_XY1637760563_Z0_T00_C2.tif	41	3
52	LLOMe_90x1 - E_V4_dsRed_E_HL5c - 1.Project Maximum Z_XY1637760563_Z0_T00_C2.tif	37	3
53	LLOMe_90x1 - E_V4_dsRed_E_HL5c - 1.Project Maximum Z_XY1637760563_Z0_T00_C2.tif	50	3
54	LLOMe_90x1 - E_V4_dsRed_E_HL5c - 1.Project Maximum Z_XY1637760563_Z0_T00_C2.tif	45	3
55	LLOMe_90x1 - E_V4_dsRed_E_HL5c - 1.Project Maximum Z_XY1637760563_Z0_T00_C2.tif	50	3
56	LLOMe_90x1 - E_V4_dsRed_E_HL5c - 1.Project Maximum Z_XY1637760563_Z0_T00_C2.tif	51	3
57	LLOMe_90x1 - E_V4_dsRed_E_HL5c - 1.Project Maximum Z_XY1637760563_Z0_T00_C2.tif	58	3
58	LLOMe_90x1 - E_V4_dsRed_E_HL5c - 1.Project Maximum Z_XY1637760563_Z0_T00_C2.tif	60	3
59	LLOMe_90x1 - E_V4_dsRed_E_HL5c - 1.Project Maximum Z_XY1637760563_Z0_T00_C2.tif	54	3
60	LLOMe_90x1 - E_V4_dsRed_E_HL5c - 1.Project Maximum Z_XY1637760563_Z0_T00_C2.tif	56	3
61	LLOMe_90x1 - E_V4_dsRed_E_HL5c - 1.Project Maximum Z_XY1637760563_Z0_T00_C2.tif	46	3
62	LLOMe_90x1 - E_V4_dsRed_E_HL5c - 1.Project Maximum Z_XY1637760563_Z0_T00_C2.tif	58	3
63	LLOMe_90x1 - E_V4_dsRed_E_HL5c - 1.Project Maximum Z_XY1637760563_Z0_T00_C2.tif	40	3
64	LLOMe_90x1 - E_V4_dsRed_E_HL5c - 1.Project Maximum Z_XY1637760563_Z0_T00_C2.tif	45	3
65	LLOMe_90x1 - E_V4_dsRed_E_HL5c - 1.Project Maximum Z_XY1637760563_Z0_T00_C2.tif	57	3
66	LLOMe_90x1 - E_V4_dsRed_E_HL5c - 1.Project Maximum Z_XY1637760563_Z0_T00_C2.tif	45	3
67	LLOMe_90x1 - E_V4_dsRed_E_HL5c - 1.Project Maximum Z_XY1637760563_Z0_T00_C2.tif	44	3
68	LLOMe_90x1 - E_V4_dsRed_E_HL5c - 1.Project Maximum Z_XY1637760563_Z0_T00_C2.tif	53	3
69	LLOMe_90x1 - E_V4_dsRed_E_HL5c - 1.Project Maximum Z_XY1637760563_Z0_T00_C2.tif	54	3
70	LLOMe_90x1 - E_V4_dsRed_E_HL5c - 1.Project Maximum Z_XY1637760563_Z0_T00_C2.tif	64	3
71	LLOMe_90x1 - E_V4_dsRed_E_HL5c - 1.Project Maximum Z_XY1637760563_Z0_T00_C2.tif	55	3
72	LLOMe_90x1 - E_V4_dsRed_E_HL5c - 1.Project Maximum Z_XY1637760563_Z0_T00_C2.tif	54	3
73	LLOMe_90x1 - E_V4_dsRed_E_HL5c - 1.Project Maximum Z_XY1637760563_Z0_T00_C2.tif	61	3
74	LLOMe_90x1 - E_V4_dsRed_E_HL5c - 1.Project Maximum Z_XY1637760563_Z0_T00_C2.tif	53	3
75	LLOMe_90x1 - E_V4_dsRed_E_HL5c - 1.Project Maximum Z_XY1637760563_Z0_T00_C2.tif	71	3
76	LLOMe_90x1 - E_V4_dsRed_E_HL5c - 1.Project Maximum Z_XY1637760563_Z0_T00_C2.tif	66	3
77	LLOMe_90x1 - E_V4_dsRed_E_HL5c - 1.Project Maximum Z_XY1637760563_Z0_T00_C2.tif	68	3
78	LLOMe_90x1 - E_V4_dsRed_E_HL5c - 1.Project Maximum Z_XY1637760563_Z0_T00_C2.tif	70	3
79	LLOMe_90x1 - E_V4_dsRed_E_HL5c - 1.Project Maximum Z_XY1637760563_Z0_T00_C2.tif	70	3
80	LLOMe_90x1 - E_V4_dsRed_E_HL5c - 1.Project Maximum Z_XY1637760563_Z0_T00_C2.tif	65	3
81	LLOMe_90x1 - E_V4_dsRed_E_HL5c - 1.Project Maximum Z_XY1637760563_Z0_T00_C2.tif	62	3
82	LLOMe_90x1 - E_V4_dsRed_E_HL5c - 1.Project Maximum Z_XY1637760563_Z0_T00_C2.tif	72	3
83	LLOMe_90x1 - E_V4_dsRed_E_HL5c - 1.Project Maximum Z_XY1637760563_Z0_T00_C2.tif	62	3
84	LLOMe_90x1 - E_V4_dsRed_E_HL5c - 1.Project Maximum Z_XY1637760563_Z0_T00_C2.tif	69	3
85	LLOMe_90x1 - E_V4_dsRed_E_HL5c - 1.Project Maximum Z_XY1637760563_Z0_T00_C2.tif	73	3
86	LLOMe_90x1 - E_V4_dsRed_E_HL5c - 1.Project Maximum Z_XY1637760563_Z0_T00_C2.tif	73	3
87	LLOMe_90x1 - E_V4_dsRed_E_HL5c - 1.Project Maximum Z_XY1637760563_Z0_T00_C2.tif	79	3
88	LLOMe_90x1 - E_V4_dsRed_E_HL5c - 1.Project Maximum Z_XY1637760563_Z0_T00_C2.tif	72	3
89	LLOMe_90x1 - E_V4_dsRed_E_HL5c - 1.Project Maximum Z_XY1637760563_Z0_T00_C2.tif	64	3
90	LLOMe_90x1 - E_V4_dsRed_E_HL5c - 1.Project Maximum Z_XY1637760563_Z0_T00_C2.tif	81	3
