# Supplementary material for: A TRAF-like E3 ubiquitin ligase TrafE coordinates ESCRT and autophagy in endolysosomal damage response and cell-autonomous immunity to Mycobacterium marinum
Source: eLife. 2023 Apr 18;12:e85727. doi: 10.7554/eLife.85727 (PMC10181826; doi:10.7554/eLife.85727)
Supplement: Figure 11—source data 1. [file elife-85727-fig11-data1.xlsx]

## Sheet: VPS4 t0
Plate ID	Well Name	Site ID	MEASUREMENT SET ID	All Dicty_FITC_Features Count_Sum.Total (Lyudmil)	Vps32 positive Dicty_Features Count_Sum.Total (Lyudmil)	Vps32 dotsFeatures Count_Sum.Total (Lyudmil)	Cell: All Dicty_FITC_Features Count_Sum (Lyudmil)	Cell: Vps32 positive Dicty_Features Count_Sum (Lyudmil)	Cell: Vps32 dots_Area_Average (Lyudmil)	Cell: Vps32 dotsArea_Sum (Lyudmil)	Cell: Vps32 dotsFeatures Count_Sum (Lyudmil)	Cell: Vps32 positive dicty_Area_Average (Lyudmil)	Well Name	Site ID	Strain	Average nb of structures
54604	B09	1	16835				88	20	0.125368	2.7581	22	137.361	B09	1	wt	0.25
54604	B09	2	16835				86	29	0.133881	4.41807	33	160.056	B09	2	wt	0.383721
54604	C09	1	16835				64	4	0.114921	0.459684	4	139.977	C09	1	trafE KO	0.0625
54604	C09	2	16835				87	5	0.165997	0.829985	5	93.9773	C09	2	trafE KO	0.0574713
54604	F08	1	16835				58	6	0.28639	2.00473	7	103.059	F08	1	trafE KO	0.12069
54604	F08	2	16835				64	7	0.137267	1.09813	8	143.826	F08	2	trafE KO	0.125
54604	F10	1	16835				59	3	0.114921	0.344763	3	97.138	F10	1	trafE KO	0.0508475
54604	F10	2	16835				46	7	0.124498	0.995982	8	124.554	F10	2	trafE KO	0.173913
54604	G08	1	16835				59	11	0.143235	3.2944	23	166.557	G08	1	wt	0.389831
54604	G08	2	16835				59	19	0.125136	3.1284	25	162.508	G08	2	wt	0.423729
54604	G10	1	16835				29	5	0.134074	0.804447	6	117.791	G10	1	wt	0.206897
54604	G10	2	16835				71	22	0.135257	3.65193	27	144.813	G10	2	wt	0.380282
54606	B09	1	16836				81	9	0.147424	1.62166	11	154.411	B09	1	wt	0.135802
54606	B09	1	16836				79	28	0.145102	4.78838	33	135.448	B09	1	wt	0.417722
54606	B09	1	16836				84	18	0.15476	3.86901	25	155.031	B09	1	wt	0.297619
54606	B09	1	16836				84	28	0.173054	6.57604	38	140.397	B09	1	wt	0.452381
54606	B09	1	16836				88	41	0.161814	9.38522	58	124.267	B09	1	wt	0.659091
54606	B09	1	16836				85	36	0.168888	8.95107	53	112.516	B09	1	wt	0.623529
54606	B09	1	16836				87	47	0.166544	11.6581	70	116.684	B09	1	wt	0.804598
54606	B09	1	16836				82	49	0.178621	15.7186	88	140.096	B09	1	wt	1.07317
54606	B09	1	16836				88	47	0.183453	14.4928	79	115.459	B09	1	wt	0.897727
54606	B09	1	16836				87	51	0.191905	13.2415	69	112.702	B09	1	wt	0.793103
54606	B09	1	16836				84	40	0.185657	11.6964	63	115.392	B09	1	wt	0.75
54606	B09	1	16836				82	41	0.169588	10.8537	64	115.857	B09	1	wt	0.780488
54606	B09	1	16836				84	42	0.174235	10.8026	62	111.7	B09	1	wt	0.738095
54606	B09	2	16836				89	23	0.128163	3.4604	27	142.013	B09	2	wt	0.303371
54606	B09	2	16836				92	28	0.137176	4.80114	35	137.781	B09	2	wt	0.380435
54606	B09	2	16836				97	38	0.159754	7.18895	45	139.925	B09	2	wt	0.463918
54606	B09	2	16836				100	39	0.163296	8.49138	52	119.84	B09	2	wt	0.52
54606	B09	2	16836				100	47	0.188718	12.8328	68	120.281	B09	2	wt	0.68
54606	B09	2	16836				101	50	0.196239	14.9142	76	113.362	B09	2	wt	0.752475
54606	B09	2	16836				103	58	0.185731	16.3443	88	114.345	B09	2	wt	0.854369
54606	B09	2	16836				99	61	0.183096	21.0561	115	112.207	B09	2	wt	1.16162
54606	B09	2	16836				98	51	0.18494	16.8295	91	114.989	B09	2	wt	0.928571
54606	B09	2	16836				97	46	0.184542	15.5016	84	112.612	B09	2	wt	0.865979
54606	B09	2	16836				105	51	0.186863	15.3228	82	103.948	B09	2	wt	0.780952
54606	B09	2	16836				104	46	0.184982	14.0587	76	101.942	B09	2	wt	0.730769
54606	B09	2	16836				103	33	0.151455	5.45236	36	128.32	B09	2	wt	0.349515
54606	F08	1	16836				61	6	0.200656	1.40459	7	107.555	F08	1	trafE KO	0.114754
54606	F08	1	16836				56	12	0.147908	1.77489	12	115.856	F08	1	trafE KO	0.214286
54606	F08	1	16836				54	5	0.137267	1.09813	8	82.9193	F08	1	trafE KO	0.148148
54606	F08	1	16836				57	6	0.17451	2.09412	12	104.382	F08	1	trafE KO	0.210526
54606	F08	1	16836				55	5	0.178766	1.78766	10	127.81	F08	1	trafE KO	0.181818
54606	F08	1	16836				56	6	0.164401	1.31521	8	89.1	F08	1	trafE KO	0.142857
54606	F08	1	16836				59	10	0.152246	1.9792	13	98.1323	F08	1	trafE KO	0.220339
54606	F08	1	16836				61	3	0.134074	0.804447	6	84.2456	F08	1	trafE KO	0.0983607
54606	F08	1	16836				60	5	0.194482	2.52826	13	86.035	F08	1	trafE KO	0.216667
54606	F08	1	16836				60	6	0.183554	2.93687	16	89.0127	F08	1	trafE KO	0.266667
54606	F08	1	16836				59	6	0.159613	2.23457	14	85.9162	F08	1	trafE KO	0.237288
54606	F08	1	16836				59	7	0.193276	4.25208	22	91.2309	F08	1	trafE KO	0.372881
54606	F08	1	16836				57	4	0.339655	1.69828	5	110.107	F08	1	trafE KO	0.0877193
54606	F08	2	16836				81	15	0.157011	4.23931	27	88.7386	F08	2	trafE KO	0.333333
54606	F08	2	16836				80	10	0.139851	2.93687	21	82.2502	F08	2	trafE KO	0.2625
54606	F08	2	16836				83	11	0.174123	5.74605	33	80.6014	F08	2	trafE KO	0.39759
54606	F08	2	16836				68	9	0.119177	1.0726	9	105.557	F08	2	trafE KO	0.132353
54606	F08	2	16836				68	3	0.171105	0.855523	5	79.2231	F08	2	trafE KO	0.0735294
54606	F08	2	16836				74	14	0.145717	2.47719	17	98.4928	F08	2	trafE KO	0.22973
54606	F08	2	16836				73	13	0.179564	2.87303	16	99.9881	F08	2	trafE KO	0.219178
54606	F08	2	16836				72	10	0.159121	2.06858	13	106.147	F08	2	trafE KO	0.180556
54606	F08	2	16836				73	11	0.143941	1.58336	11	112.443	F08	2	trafE KO	0.150685
54606	F08	2	16836				77	10	0.135139	1.62166	12	98.2306	F08	2	trafE KO	0.155844
54606	F08	2	16836				75	11	0.161741	1.94089	12	88.3475	F08	2	trafE KO	0.16
54606	F08	2	16836				75	6	0.141736	1.41736	10	106.634	F08	2	trafE KO	0.133333
54606	F08	2	16836				82	11	0.167274	3.34548	20	87.788	F08	2	trafE KO	0.243902
54606	F10	1	16836				53	3	0.17451	0.523529	3	78.108	F10	1	trafE KO	0.0566038
54606	F10	1	16836				55	7	0.143651	1.14921	8	110.596	F10	1	trafE KO	0.145455
54606	F10	1	16836				53	8	0.144715	1.30244	9	116.741	F10	1	trafE KO	0.169811
54606	F10	1	16836				55	8	0.147553	1.32798	9	98.8799	F10	1	trafE KO	0.163636
54606	F10	1	16836				59	6	0.206432	1.23859	6	93.1052	F10	1	trafE KO	0.101695
54606	F10	1	16836				57	4	0.134074	0.536298	4	94.098	F10	1	trafE KO	0.0701754
54606	F10	1	16836				58	9	0.149397	1.49397	10	96.4471	F10	1	trafE KO	0.172414
54606	F10	1	16836				52	3	0.12769	0.38307	3	82.0876	F10	1	trafE KO	0.0576923
54606	F10	1	16836				57	3	0.114921	0.344763	3	79.2997	F10	1	trafE KO	0.0526316
54606	F10	1	16836				60	2	0.114921	0.229842	2	95.6526	F10	1	trafE KO	0.0333333
54606	F10	1	16836				60	7	0.147553	1.32798	9	78.4236	F10	1	trafE KO	0.15
54606	F10	1	16836				59	5	0.150674	0.753371	5	82.3269	F10	1	trafE KO	0.0847458
54606	F10	1	16836				60	9	0.15671	1.72382	11	85.9084	F10	1	trafE KO	0.183333
54606	F10	2	16836				49	2	0.185151	0.370301	2	141.085	F10	2	trafE KO	0.0408163
54606	F10	2	16836				43	4	0.114921	0.459684	4	167.37	F10	2	trafE KO	0.0930233
54606	F10	2	16836				49	4	0.150036	0.600143	4	127.224	F10	2	trafE KO	0.0816327
54606	F10	2	16836				49	5	0.150674	0.753371	5	124.148	F10	2	trafE KO	0.102041
54606	F10	2	16836				47	7	0.146134	1.31521	9	97.4421	F10	2	trafE KO	0.191489
54606	F10	2	16836				49	4	0.130882	0.523529	4	86.7717	F10	2	trafE KO	0.0816327
54606	F10	2	16836				52	4	0.137905	0.689526	5	82.3537	F10	2	trafE KO	0.0961538
54606	F10	2	16836				50	7	0.12769	0.89383	7	98.7208	F10	2	trafE KO	0.14
54606	F10	2	16836				49	3	0.130882	0.523529	4	86.8249	F10	2	trafE KO	0.0816327
54606	F10	2	16836				51	2	0.114921	0.229842	2	100.358	F10	2	trafE KO	0.0392157
54606	F10	2	16836				52	1	0.114921	0.114921	1	91.6431	F10	2	trafE KO	0.0192308
54606	F10	2	16836				49	4	0.124498	0.497991	4	90.9855	F10	2	trafE KO	0.0816327
54606	F10	2	16836				51	3	0.114921	0.459684	4	102.267	F10	2	trafE KO	0.0784314
54606	G08	1	16836				63	13	0.146507	2.78364	19	120.844	G08	1	wt	0.301587
54606	G08	1	16836				57	30	0.160943	7.72525	48	136.634	G08	1	wt	0.842105
54606	G08	1	16836				60	40	0.176182	14.7993	84	117.181	G08	1	wt	1.4
54606	G08	1	16836				59	44	0.183725	18.9237	103	110.003	G08	1	wt	1.74576
54606	G08	1	16836				59	35	0.153008	8.87445	58	137.588	G08	1	wt	0.983051
54606	G08	1	16836				59	33	0.174837	11.3644	65	107.925	G08	1	wt	1.10169
54606	G08	1	16836				60	51	0.183318	21.0816	115	101.02	G08	1	wt	1.91667
54606	G08	1	16836				65	54	0.192434	27.3257	142	106.109	G08	1	wt	2.18462
54606	G08	1	16836				64	49	0.184177	21.7328	118	102.886	G08	1	wt	1.84375
54606	G08	1	16836				60	56	0.206819	27.3001	132	103.013	G08	1	wt	2.2
54606	G08	1	16836				64	47	0.19219	22.4862	117	102.094	G08	1	wt	1.82812
54606	G08	1	16836				63	52	0.19762	29.4453	149	100.438	G08	1	wt	2.36508
54606	G08	1	16836				65	58	0.191885	28.0152	146	97.438	G08	1	wt	2.24615
54606	G08	2	16836				60	10	0.118403	1.30244	11	179.685	G08	2	wt	0.183333
54606	G08	2	16836				58	29	0.168551	7.58479	45	152.067	G08	2	wt	0.775862
54606	G08	2	16836				70	37	0.168835	10.6366	63	122.67	G08	2	wt	0.9
54606	G08	2	16836				68	48	0.168551	14.3268	85	117.655	G08	2	wt	1.25
54606	G08	2	16836				70	54	0.189367	20.0729	106	117.816	G08	2	wt	1.51429
54606	G08	2	16836				66	52	0.189804	22.3968	118	115.547	G08	2	wt	1.78788
54606	G08	2	16836				69	56	0.183965	25.7551	140	108.415	G08	2	wt	2.02899
54606	G08	2	16836				69	53	0.192256	23.8397	124	111.52	G08	2	wt	1.7971
54606	G08	2	16836				70	51	0.196839	25.5891	130	118	G08	2	wt	1.85714
54606	G08	2	16836				69	60	0.191107	28.4749	149	121.145	G08	2	wt	2.15942
54606	G08	2	16836				57	27	0.149087	5.51621	37	160.201	G08	2	wt	0.649123
54606	G08	2	16836				71	55	0.196884	29.1389	148	106.487	G08	2	wt	2.08451
54606	G08	2	16836				69	50	0.204601	26.3935	129	109.311	G08	2	wt	1.86957
54606	G09	1	16836				21	5	0.183677	2.3878	13	94.9554	G09	1	trafE KO	0.619048
54606	G09	1	16836				20	10	0.198984	2.3878	12	107.247	G09	1	trafE KO	0.6
54606	G09	1	16836				22	6	0.167593	1.34075	8	104.395	G09	1	trafE KO	0.363636
54606	G09	1	16836				24	10	0.185487	3.52424	19	93.6849	G09	1	trafE KO	0.791667
54606	G09	1	16836				25	6	0.140459	0.983213	7	87.1697	G09	1	trafE KO	0.28
54606	G09	1	16836				22	11	0.151525	2.27288	15	101.474	G09	1	trafE KO	0.681818
54606	G09	1	16836				24	10	0.14958	2.09412	14	98.3736	G09	1	trafE KO	0.583333
54606	G09	1	16836				21	8	0.162349	2.27288	14	104.739	G09	1	trafE KO	0.666667
54606	G09	1	16836				23	6	0.190684	2.86026	15	104.98	G09	1	trafE KO	0.652174
54606	G09	1	16836				21	7	0.169189	2.03027	12	86.9751	G09	1	trafE KO	0.571429
54606	G09	1	16836				24	8	0.171255	2.91133	17	88.2545	G09	1	trafE KO	0.708333
54606	G09	1	16836				20	7	0.166748	2.83472	17	100.018	G09	1	trafE KO	0.85
54606	G09	1	16836				24	12	0.172382	3.79239	22	89.6011	G09	1	trafE KO	0.916667
54606	G09	2	16836				23	6	0.136977	1.50674	11	110.516	G09	2	trafE KO	0.478261
54606	G09	2	16836				24	8	0.155356	1.86427	12	88.2354	G09	2	trafE KO	0.5
54606	G09	2	16836				22	7	0.168835	1.51951	9	88.7227	G09	2	trafE KO	0.409091
54606	G09	2	16836				21	6	0.125866	0.881061	7	94.0926	G09	2	trafE KO	0.333333
54606	G09	2	16836				22	6	0.187279	1.12367	6	88.5254	G09	2	trafE KO	0.272727
54606	G09	2	16836				23	7	0.135816	1.49397	11	94.912	G09	2	trafE KO	0.478261
54606	G09	2	16836				24	7	0.146263	1.60889	11	88.978	G09	2	trafE KO	0.458333
54606	G09	2	16836				23	10	0.186427	2.79641	15	89.065	G09	2	trafE KO	0.652174
54606	G09	2	16836				22	9	0.159613	1.59613	10	93.2463	G09	2	trafE KO	0.454545
54606	G09	2	16836				22	13	0.161741	2.42611	15	89.0942	G09	2	trafE KO	0.681818
54606	G09	2	16836				22	7	0.169828	1.69828	10	98.2447	G09	2	trafE KO	0.454545
54606	G09	2	16836				23	7	0.146134	1.31521	9	86.3476	G09	2	trafE KO	0.391304
54606	G09	2	16836				21	7	0.164836	1.8132	11	93.5658	G09	2	trafE KO	0.52381
54606	G10	1	16836				29	9	0.141441	1.83874	13	125.691	G10	1	wt	0.448276
54606	G10	1	16836				30	9	0.147335	1.91535	13	123.764	G10	1	wt	0.433333
54606	G10	1	16836				33	16	0.15054	2.86026	19	117.138	G10	1	wt	0.575758
54606	G10	1	16836				35	12	0.164781	3.4604	21	119.106	G10	1	wt	0.6
54606	G10	1	16836				33	19	0.168468	5.22252	31	118.578	G10	1	wt	0.939394
54606	G10	1	16836				33	16	0.184914	4.99268	27	121.337	G10	1	wt	0.818182
54606	G10	1	16836				34	13	0.149342	3.43486	23	117.518	G10	1	wt	0.676471
54606	G10	1	16836				35	19	0.168362	4.54576	27	105.95	G10	1	wt	0.771429
54606	G10	1	16836				33	10	0.2351	3.9967	17	123.103	G10	1	wt	0.515152
54606	G10	1	16836				36	23	0.178766	5.72051	32	102.777	G10	1	wt	0.888889
54606	G10	1	16836				36	16	0.166373	5.65667	34	108.473	G10	1	wt	0.944444
54606	G10	1	16836				34	12	0.197583	3.75409	19	92.156	G10	1	wt	0.558824
54606	G10	1	16836				34	14	0.17468	4.367	25	104.141	G10	1	wt	0.735294
54606	G10	2	16836				71	19	0.12711	2.79641	22	155.877	G10	2	wt	0.309859
54606	G10	2	16836				73	25	0.178766	6.25681	35	129.864	G10	2	wt	0.479452
54606	G10	2	16836				70	17	0.147424	3.24333	22	131.832	G10	2	wt	0.314286
54606	G10	2	16836				75	31	0.167627	7.87847	47	127.942	G10	2	wt	0.626667
54606	G10	2	16836				77	38	0.168262	10.4323	62	117.42	G10	2	wt	0.805195
54606	G10	2	16836				79	49	0.175406	13.3308	76	111.25	G10	2	wt	0.962025
54606	G10	2	16836				72	45	0.207496	16.5997	80	133.337	G10	2	wt	1.11111
54606	G10	2	16836				71	45	0.169508	13.5607	80	131.095	G10	2	wt	1.12676
54606	G10	2	16836				70	44	0.189893	13.2925	70	130.097	G10	2	wt	1
54606	G10	2	16836				78	31	0.185151	11.4793	62	126.513	G10	2	wt	0.794872
54606	G10	2	16836				76	34	0.190033	9.69167	51	113.854	G10	2	wt	0.671053
54606	G10	2	16836				75	34	0.166238	8.81061	53	119.119	G10	2	wt	0.706667
54606	G10	2	16836				75	29	0.164694	8.07001	49	118.469	G10	2	wt	0.653333
