# Supplementary material for: A TRAF-like E3 ubiquitin ligase TrafE coordinates ESCRT and autophagy in endolysosomal damage response and cell-autonomous immunity to Mycobacterium marinum
Source: eLife. 2023 Apr 18;12:e85727. doi: 10.7554/eLife.85727 (PMC10181826; doi:10.7554/eLife.85727)
Supplement: Figure 12—source data 1. [file elife-85727-fig12-data1.xlsx]

## Sheet: Sheet1
strain	condition	cell_nb	GFP_dots _nb	K63_Ub_dot_nb	norma_GFP	norma_Ub
wt	ctr	4	11	2	2.75	0.5
wt	ctr	4	5	3	1.25	0.75
wt	ctr	5	7	2	1.4	0.4
wt	ctr	5	8	6	1.6	1.2
wt	LLOMe	21	87	46	4.14286	2.19048
wt	LLOMe	22	97	55	4.40909	2.5
wt	LLOMe	19	127	55	6.68421	2.89474
wt	LLOMe	19	143	70	7.52632	3.68421
atg1 KO	ctr	29	28	0	0.965517	0
atg1 KO	ctr	31	29	0	0.935484	0
atg1 KO	ctr	30	24	1	0.8	0.0333333
atg1 KO	ctr	36	29	3	0.805556	0.0833333
atg1 KO	LLOMe	46	274	315	5.95652	6.84783
atg1 KO	LLOMe	45	276	319	6.13333	7.08889
atg1 KO	LLOMe	45	267	324	5.93333	7.2
atg1 KO	LLOMe	43	272	314	6.32558	7.30233
trafE KO	ctr	33	85	3	2.57576	0.0909091
trafE KO	ctr	34	104	7	3.05882	0.205882
trafE KO	ctr	34	96	5	2.82353	0.147059
trafE KO	ctr	34	114	2	3.35294	0.0588235
trafE KO	LLOMe	17	256	0	15.0588	0
trafE KO	LLOMe	18	315	0	17.5	0
trafE KO	LLOMe	18	319	1	17.7222	0.0555556
trafE KO	LLOMe	18	338	1	18.7778	0.0555556
