# Supplementary material for: A TRAF-like E3 ubiquitin ligase TrafE coordinates ESCRT and autophagy in endolysosomal damage response and cell-autonomous immunity to Mycobacterium marinum
Source: eLife journal article supplement (doi:10.7554/elife.85727), 2023-04-18
Supplement: supp [file elife_poa_e85727_Figure_12_figure_supplement_1.pdf › elife_poa_e85727_Figure_12_figure_supplement_1.pdf]

|        |             |     |                                                                |     |
|--------|-------------|-----|----------------------------------------------------------------|-----|
| Q8WUM4 | PDC6I_HUMAN | 409 | SGDTVPQSILTKSRSVIEQGGIQTVDQLIKELPELLQRNREILDESRLRLDDEEATDNDL   | 468 |
| Q9WU78 | PDC6I_MOUSE | 409 | SGDTVPQSILTKSTSVVEQGGIQTVDQLIKELPELLQRNREILEESRLRLDDEEATDNDL   | 468 |
| Q9QZA2 | PDC6I_RAT   | 414 | SGDTVPQSILTKSTAVVEQGGIQTVDQLIKELPELLQRNREILEESRLRLDDEEATDNDL   | 473 |
| Q9W6C5 | PDC6I_XENLA | 408 | SGDSIPQSILNKSKTVIEQGGIQTIGQLIRDLPELLQRNKEILEESLKFLDDEEATDNDL   | 467 |
| Q8T7K0 | ALIX_DICDI  | 402 | D-VGVFPVALKEKMNVVTNEQGVSNITRLLENIQQLSDEDSAICLSAGNLLKKEEDEDNLM  | 460 |
| O88522 | NEMO_MOUSE  | 1   | -----erhareklvekkeylq-----                                     | 16  |
|        |             |     | .. : ..                                                        |     |
| Q8WUM4 | PDC6I_HUMAN | 469 | RAKFKERWQRTPSNELYKPLRAEGTNFRTVLDKAVQADGQVKECYQSHRDTIVLLCKPEP   | 528 |
| Q9WU78 | PDC6I_MOUSE | 469 | RAKFKDRWQRTPSNDLYKPLRAEGAKFRAVLDKAVQADGQVKERYQSHRDTIALLLCKPEP  | 528 |
| Q9QZA2 | PDC6I_RAT   | 474 | RAKFKDRWQRTPSNDLYKPLRAEGAKFRAVLDKAVQADGQVKERYQSHRDTIALLLCKPEP  | 533 |
| Q9W6C5 | PDC6I_XENLA | 468 | KAKFKDRWQRTPSTELYKPLRSEGSNFRNVLDKAIGADAVVKERYQSHREAIIVLLCKPEA  | 527 |
| Q8T7K0 | ALIX_DICDI  | 461 | RATYGAQWHRTPSYTLTANLTQDYAKYTSHLQHSTKSDSFIRKKFEDHKNSIQELENQT-   | 519 |
| O88522 | NEMO_MOUSE  | 17  | -----                                                          | 16  |
| Q8WUM4 | PDC6I_HUMAN | 529 | ELNAAIPSANPAKTMQGSEVVNVLSLLSNLDEVKKEREGLENDLKSVMF--DMTSKFLLT   | 586 |
| Q9WU78 | PDC6I_MOUSE | 529 | ELNAAIPSANPAKTMQGSEVVSVLSLLSNLDEIKKERESENDLKSVMF--DMTSKFLLT    | 586 |
| Q9QZA2 | PDC6I_RAT   | 534 | ELNAAIPSANPAKTMQGSEVVNVLSLLSNLDEIKKEREGLENDLKSVMF--DMTSKFLLT   | 591 |
| Q9W6C5 | PDC6I_XENLA | 528 | ELNAAIPSANPAKTMQGSEVVTVLSLLNKLDMMKKEREQLENDIKSVMF--DMTTKFLLT   | 585 |
| Q8T7K0 | ALIX_DICDI  | 520 | EIIALLPTNNLPSG--KIAETASLTVLMNDLDALMANRESIAEKLKNLCKKDDITLKLSS   | 577 |
| O88522 | NEMO_MOUSE  | 17  | -----                                                          | 16  |
| Q8WUM4 | PDC6I_HUMAN | 587 | ALAQDGVINEEALSVTELDREVYGGGLTTKVQESLKKQEGLLKNIQVSHOEFSKMKQSNNEA | 646 |
| Q9WU78 | PDC6I_MOUSE | 587 | ALAQDGVINEEALSVTELDRIYGGGLTSKVQESLKKQEGLLKNIQVSHOEFSKMKQSNNEA  | 646 |
| Q9QZA2 | PDC6I_RAT   | 592 | ALAQDGVINEEALSVTELDRIYGGGLTTKVQESLKKQEGLLKNIQVSHOEFSKMKQSNSEA  | 651 |
| Q9W6C5 | PDC6I_XENLA | 586 | ALAQDGAVNEEAISVTELDQIYGSYTYKQENLKKQEDLLNNIQSAHOEFSKMKQSNSEA    | 645 |
| Q8T7K0 | ALIX_DICDI  | 578 | PQKDKS-----LIYAEETQKYEPLQMSLNESFLKQOKLIEDIRKENEKETNQ--KSKQG    | 629 |
| O88522 | NEMO_MOUSE  | 17  | -----eqleqlarelnklkvq----                                      | 32  |
|        |             |     | :::: :*::                                                      |     |
