# Supplementary figures and images for: A TRAF-like E3 ubiquitin ligase TrafE coordinates ESCRT and autophagy in endolysosomal damage response and cell-autonomous immunity to Mycobacterium marinum
Source: eLife journal article supplement (doi:10.7554/elife.85727), 2023-04-18

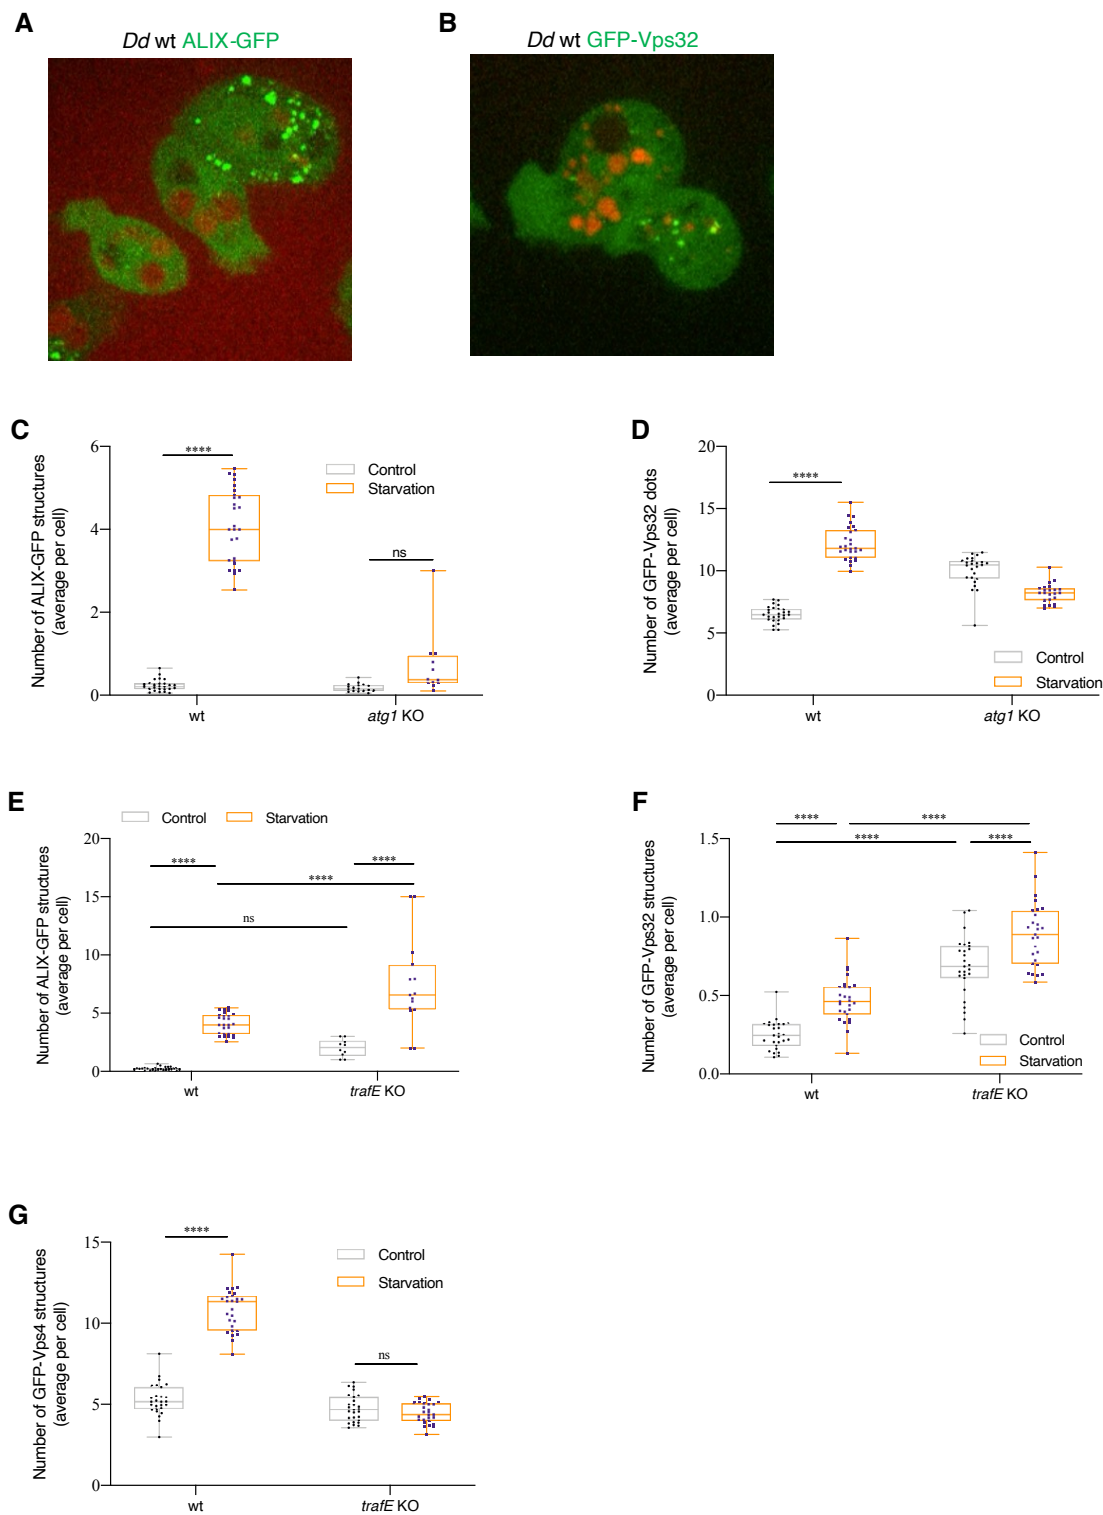

Supplement: supp [file elife_poa_e85727_Figure_10_figure_supplement_1.pdf › elife_poa_e85727_Figure_10_figure_supplement_1.pdf]

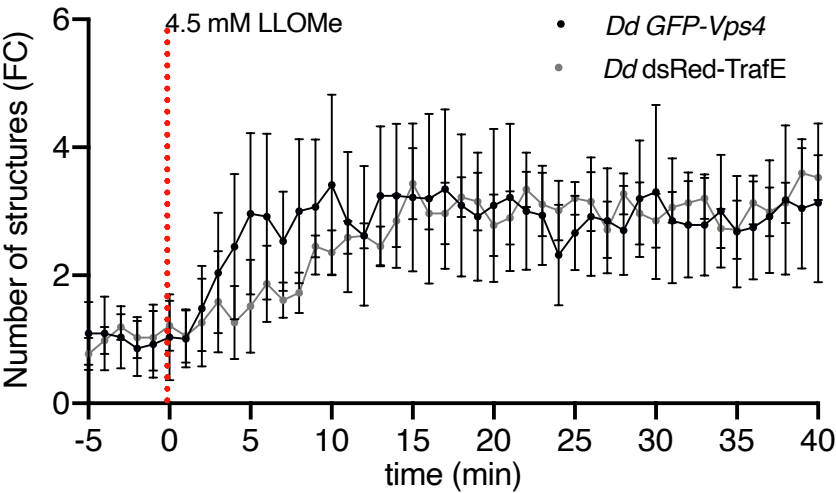

Supplement: supp [file elife_poa_e85727_Figure_11_figure_supplement_1.pdf › elife_poa_e85727_Figure_11_figure_supplement_1.pdf]

**A**

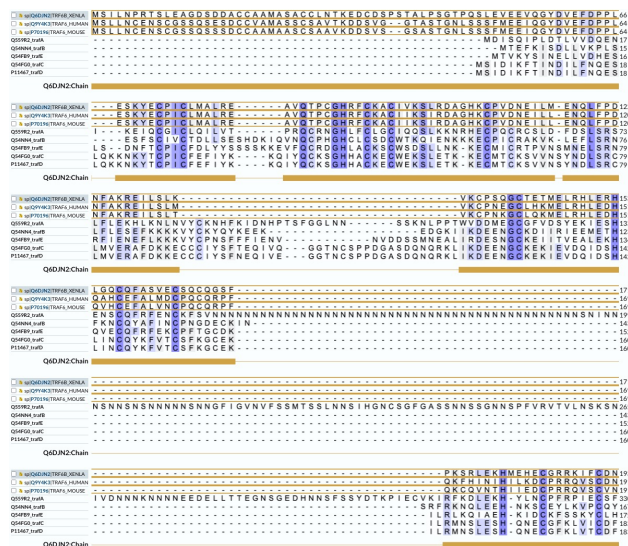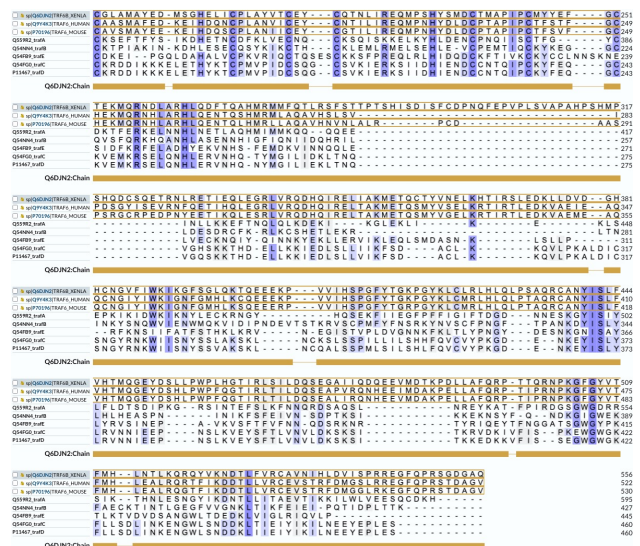

**B**

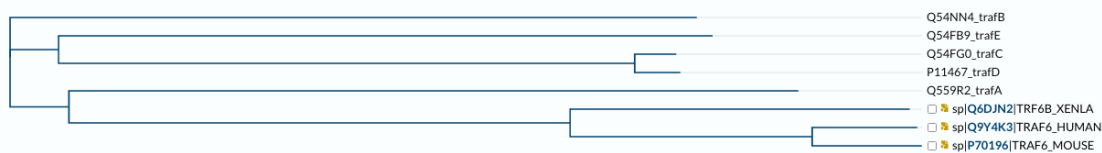

**C**

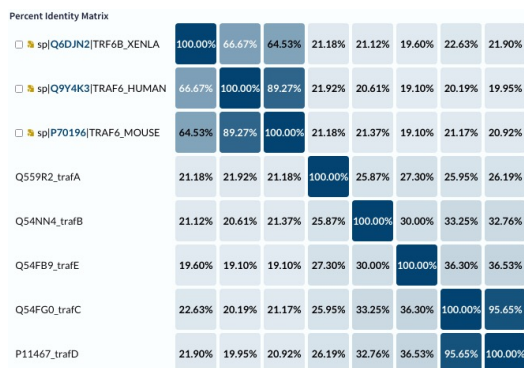

D

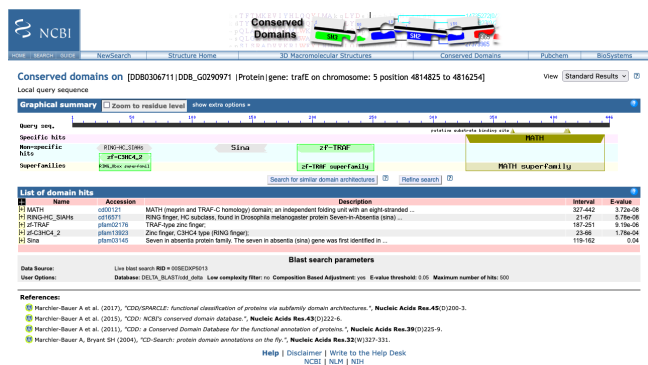

# E

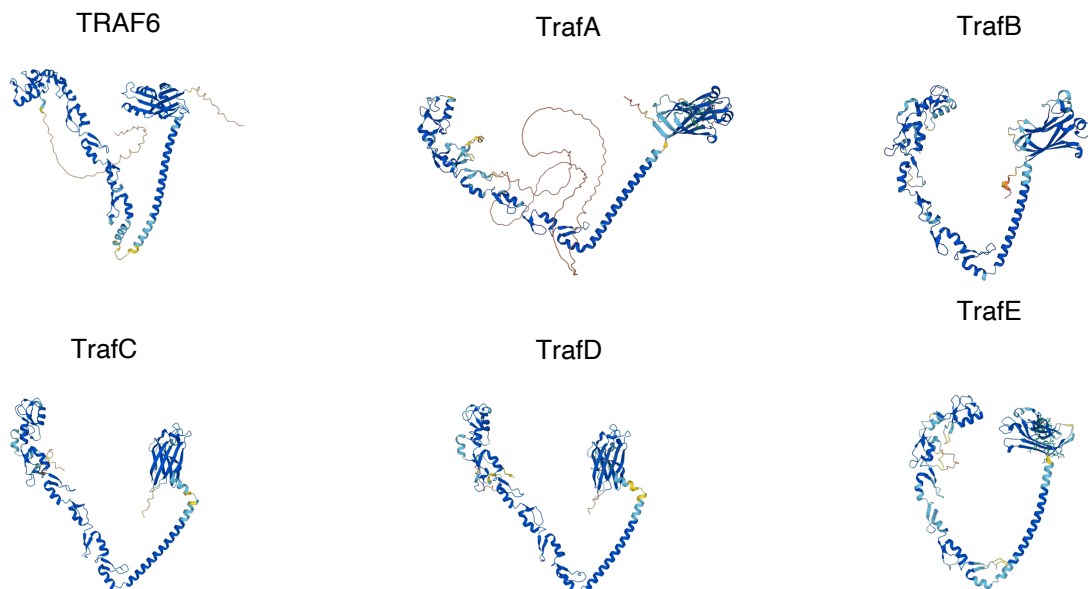

Supplement: supp [file elife_poa_e85727_Figure_1_figure_supplement_1.pdf › elife_poa_e85727_Figure_1_figure_supplement_1.pdf]

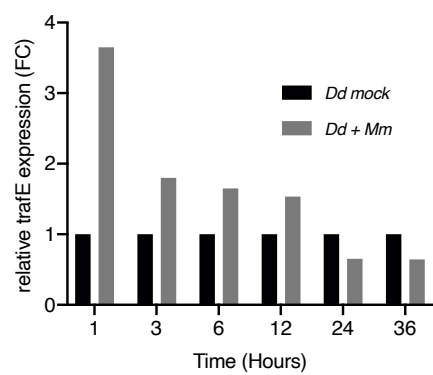

Supplement: supp [file elife_poa_e85727_Figure_1_figure_supplement_2.pdf › elife_poa_e85727_Figure_1_figure_supplement_2.pdf]

**A**

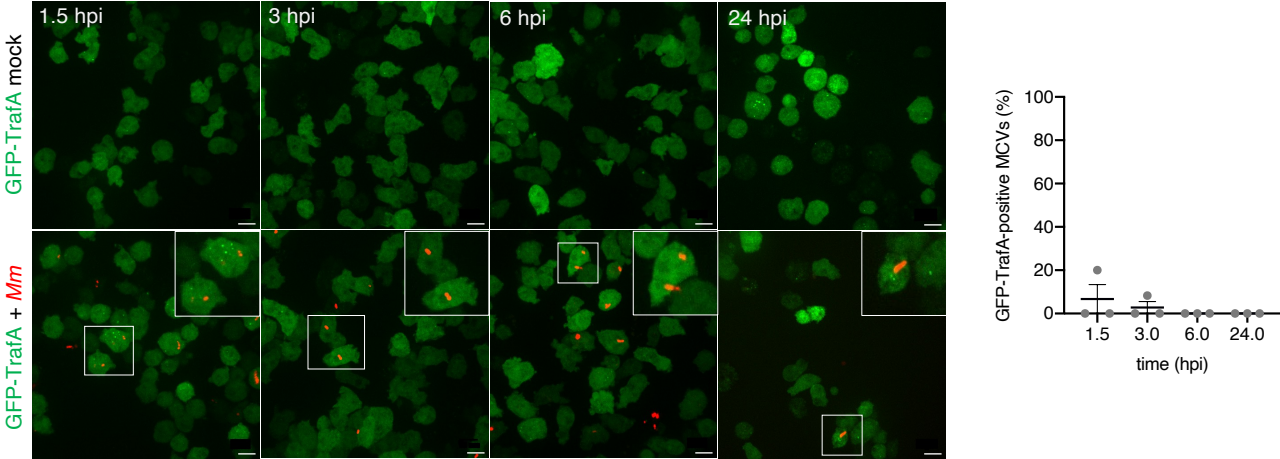

**B**

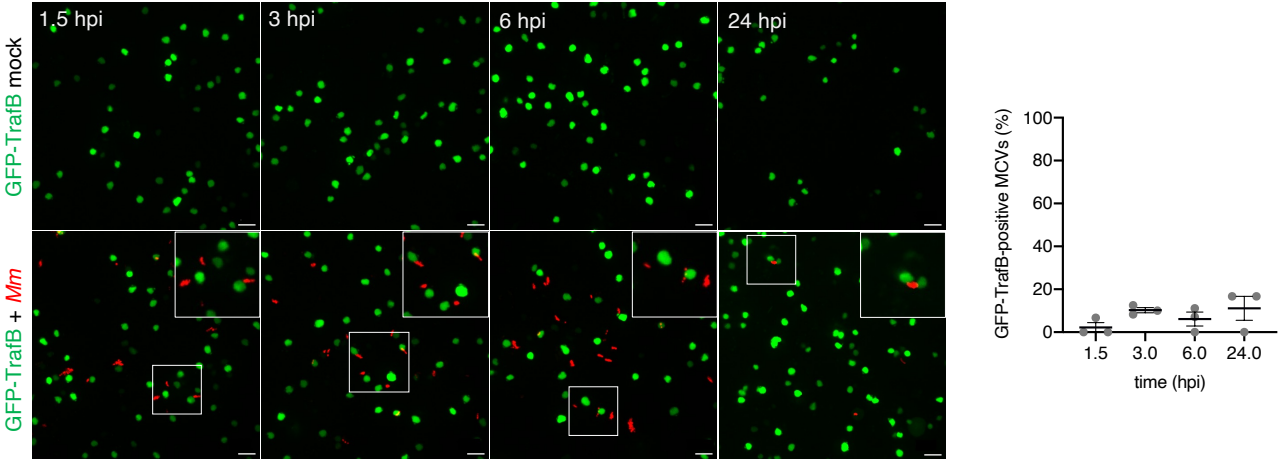

**C**

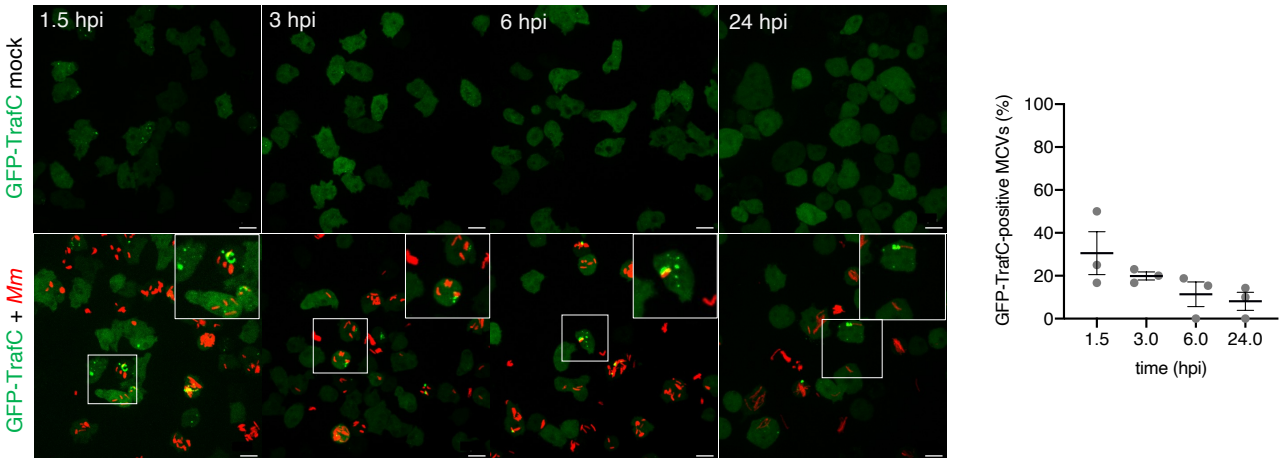

**D**

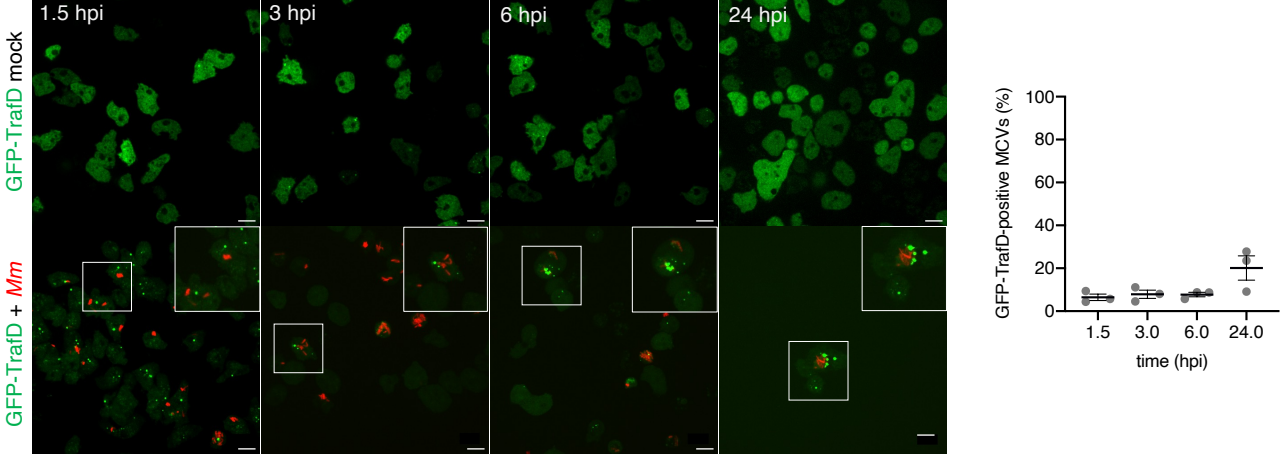

Supplement: supp [file elife_poa_e85727_Figure_1_figure_supplement_3.pdf › elife_poa_e85727_Figure_1_figure_supplement_3.pdf]

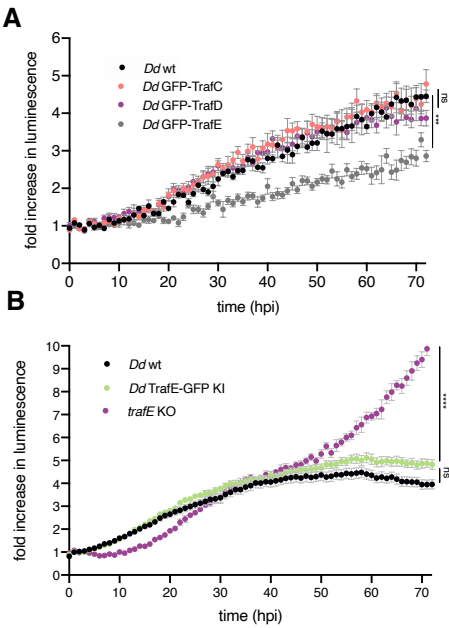

Supplement: supp [file elife_poa_e85727_Figure_1_figure_supplement_4.pdf › elife_poa_e85727_Figure_1_figure_supplement_4.pdf]

A

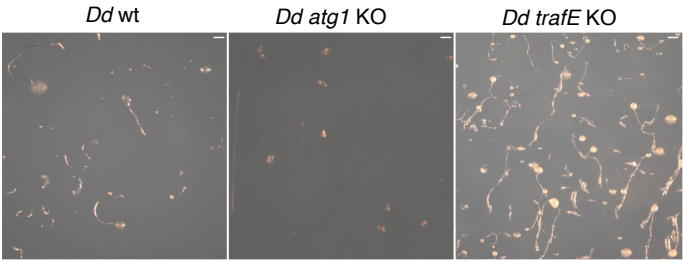

B

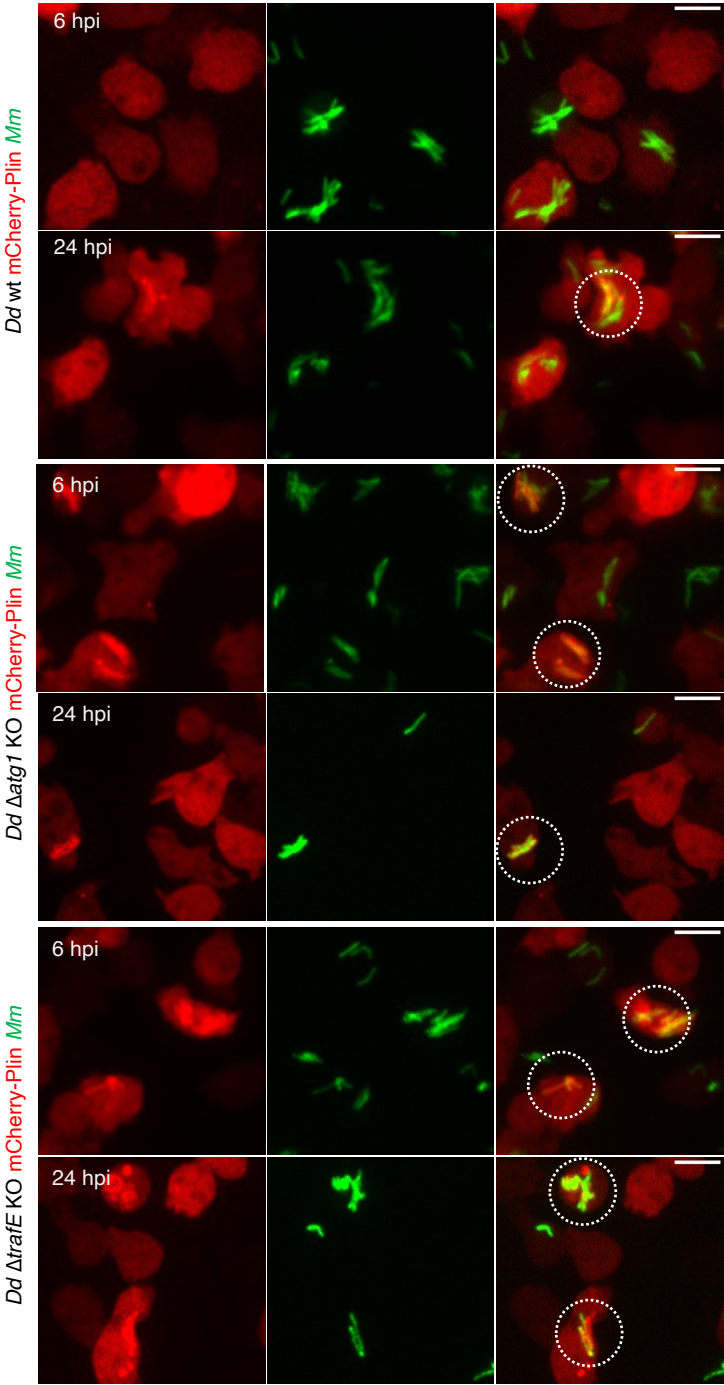

Supplement: supp [file elife_poa_e85727_Figure_2_figure_supplement_1.pdf › elife_poa_e85727_Figure_2_figure_supplement_1.pdf]

A

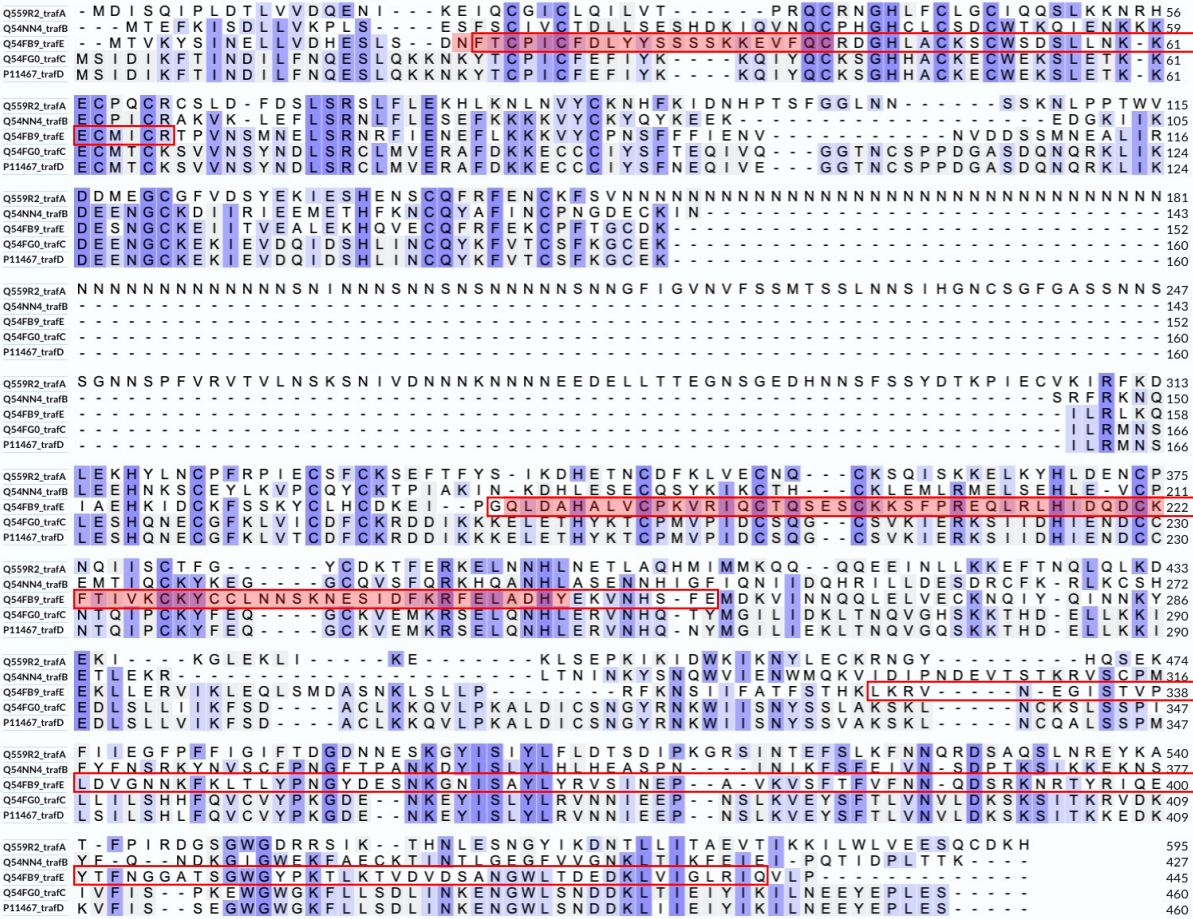

B

| Gene name | RING                    | TRAF                        | MATH    |
|-----------|-------------------------|-----------------------------|---------|
| trafA     | 9-149                   | 326-410                     | 451-578 |
| trafB     | 5-100                   | 122-236                     | 312-417 |
| trafC     | 8-91                    | 127-255                     | 328-450 |
| trafD     | 8-91                    | 127-255                     | 319-456 |
| trafE     | 21-67 ( $\Delta$ 20-43) | 182-260 ( $\Delta$ 184-252) | 327-442 |

Supplement: supp [file elife_poa_e85727_Figure_5_figure_supplement_1.pdf › elife_poa_e85727_Figure_5_figure_supplement_1.pdf]
